# Supplementary material for: Genome-wide association study reveals quantitative trait loci for waterlogging-triggered adventitious roots and aerenchyma formation in common wheat
Source: Front Plant Sci. 2022 Nov 23;13:1066752. doi: 10.3389/fpls.2022.1066752 (PMC9727299; doi:10.3389/fpls.2022.1066752)
Supplement: Supplementary file 1 [file DataSheet_1.xlsx]

## Sheet: S1-trait
Table S1 Aerenchyma formation and root survival scores under waterlogged conditions
Genotype	Aerenchyma fromation	Root survival - Glasshouse trial 1	Root survival - Glasshouse trial 2	Root survival - Outdoor tank trial
073/44	2.58	10	10	7
19401	2.25	9	10	4
19720	2.5	7	8	6
92FS-16	2.5	6	5	4
AEGYLOPS14257	2.67	5	7	7
AFGHANISTAN7	2.17	4	7	3
AHGAF	1.08	5	7	5
ALBIDUM24	0.17	6	9	5
Al-wheat	2.08	4	8	7
ARTEMOVKA	2.5	3	5	6
AUS19392	1.83	3	5	5
AUS19393	3.25	9	6	6
AUS19394	2.83	4	9	4
AUS19395	4	5	7	7
AUS19396	0.67	6	9	8
AUS19397	2.25	4	6	8
AUS19398	3.08	7	9	4
AUS19399	1.83	7	9	4
AUS19400	2.5	9	10	5
AUS19402	3.75	5	9	5
AUS19403	2.92	10	10	6
AUS19719	1.83	10	7	6
B-T-17	3	10	10	7
B-T-35	1.5	-	10	9
B-T-38	1.92	10	10	9
B-T-51	3.17	9	8	7
BUKOVINKA	3.08	10	10	9
CAZ53	1.67	9	10	9
E.M.S.SUMMIT70-8	1.17	10	8	8
EXITOB	2.58	10	10	7
FERRUGINEUM	1.33	10	9	6
FRETES	3.42	5	9	6
FRETES	2.58	5	7	6
FRETES	0.67	8	8	5
Glover	2.92	4	9	6
H-001	3.25	6	10	8
H-002	1.33	5	8	6
H-003	3.5	4	7	-
H-004	0.67	6	8	4
H-005	0.83	6	10	6
H-006	1.17	10	10	7
H-007	3.33	9	9	7
H-008	1.5	7	9	4
H-009	0.67	10	9	8
H-010	2.67	8	6	5
H-011	3.17	7	5	6
H-012	2.67	9	7	8
H-013	1.33	4	10	6
H-014	1.17	-	-	-
H-015	1.33	4	8	5
H-016	1.67	4	9	7
H-017	0.67	6	10	7
H-019	3.17	3	6	6
H-020	3.33	2	5	5
H-021	1.17	1	8	4
H-022	2	1	8	4
H-023	2.67	6	4	3
H-024	1.67	3	9	3
H-025	0.67	6	6	6
H-027	1.54	-	-	-
H-028	2.67	1	8	7
H-030	1	2	8	6
H-031	2.67	2	6	6
H-033	1.83	1	9	5
H-034	1.11	4	10	6
H-037	0.83	5	9	5
H-038	3.83	10	9	6
H-039	3.33	8	6	5
H-040	2.33	6	6	6
H-041	1.33	3	6	5
H-042	2.67	4	8	5
H-043	1.92	9	8	4
H-044	3.5	4	9	6
H-045	1	4	8	4
H-046	1	3	7	6
H-047	1.83	3	8	5
H-048	0.67	3	7	6
H-049	1.56	4	8	7
H-051	3	4	5	6
H-052	1	5	8	5
H-053	2.17	6	9	4
H-054	2	3	7	3
H-055	0.67	4	7	4
H-056	1.61	5	7	3
H-057	3.67	4	9	5
H-058	1.17	3	9	6
H-059	1.42	2	9	7
H-060	0.83	3	9	6
H-061	3.17	4	10	5
H-062	1.17	5	7	5
H-063	2.08	6	8	5
H-064	2.53	7	7	5
H-065	1.42	6	7	7
H-066	1.33	5	9	7
H-067	1.67	-	-	8
H-068	2.83	8	9	8
H-069	1.92	4	10	9
H-070	2.5	6	9	6
H-071	3.33	4	8	5
H-073	2.33	3	6	4
H-074	0.67	3	7	3
H-075	3.33	9	10	7
H-076	0.83	4	5	5
H-077	2.08	6	6	8
H-078	1.33	3	9	4
H-079	1.5	5	8	5
H-080	0.58	6	7	4
H-081	1.33	10	10	5
H-082	3.16	9	10	8
H-083	0.92	10	10	9
H-084	0.67	7	10	4
H-085	2.33	4	9	6
H-086	0.5	6	9	5
H-087	1.33	9	9	8
H-088	1.83	8	9	6
H-089	2.25	9	10	4
H-090	2.75	7	7	4
H-091	3.33	6	9	6
H-092	2.92	4	5	6
H-093	3.25	3	7	5
H-094	2	5	9	6
H-095	2.92	4	6	5
H-096	3.08	3	6	6
H-097	0.33	4	5	7
H-098	1.92	4	10	6
H-099	2.33	5	7	6
H-100	2	3	7	5
H-101	3.33	4	8	7
H-102	1.67	5	10	6
H-103	1.33	5	7	6
H-104	2.33	6	10	6
H-105	1.5	5	9	4
H-106	2.83	5	9	5
H-107	3.33	6	9	3
H-108	2.33	9	8	6
H-109	0.83	7	9	6
H-110	3.16	8	9	4
H-111	2.67	6	7	5
H-112	1.17	5	8	4
H-113	1.92	5	7	4
H-114	2.33	3	6	3
H-115	1.67	6	6	3
H-116	1.17	6	7	7
H-117	1.58	6	8	6
H-118	1.78	4	8	5
H-119	3	4	7	3
H-120	1.5	5	9	6
H-121	1.17	5	8	6
H-122	2.33	-	-	-
H-125	1	4	8	5
H-126	3.42	10	10	5
H-127	0.75	6	10	6
H-129	3.17	7	10	6
H-130	3	6	10	3
H-131	2.67	6	9	4
H-132	2	10	10	7
H-133	0.83	7	7	4
H-135	1.42	9	7	5
H-136	3.33	8	9	3
H-137	3.33	10	10	8
H-138	2.75	7	9	6
H-141	1.67	6	6	6
H-142	2.83	4	9	7
H-143	0.92	4	6	4
H-144	2.92	10	7	5
H-145	2.5	8	6	6
H-146	2.17	5	5	6
H-147	1.75	10	9	6
H-148	2.75	10	10	5
H-149	3	6	9	5
H-150	3	9	8	5
H-151	2.17	7	9	4
H-152	3.33	10	9	3
H-153	1.67	10	10	5
H-154	1	9	8	4
H-157	1.33	6	10	4
H-159	1.64	5	9	5
H-160	1.67	7	9	5
H-161	3.5	6	10	5
H-163	1.08	7	9	6
H-164	3	3	5	4
H-165	2.83	5	7	4
H-167	1.5	5	6	6
H-168	2.5	5	6	4
H-169	2.25	10	10	3
H-170	1.33	7	8	4
H-171	3.58	4	5	4
H-172	2.83	5	8	4
H-176	2.17	4	8	4
H-177	3	5	7	4
H-178	0.58	7	7	6
H-179	1.25	10	9	4
H-180	3.25	5	10	6
H-181	3.33	10	8	5
H-183	3.42	10	10	6
H-184	2.92	6	10	4
H-185	2.08	7	10	6
H-186	2.25	7	10	7
H-187	1.33	10	8	6
H-189	3.08	5	8	6
H-191	3	10	5	7
H-192	2.5	10	7	6
H-193	1.67	8	7	5
H-194	0.83	6	9	7
H-195	0.33	7	8	5
H-196	1.33	10	5	4
H-197	0.83	6	5	3
H-199	2.83	10	10	5
H-200	3.33	7	9	6
H-201	2.67	10	7	5
H-202	3	9	5	5
H-203	1.5	6	5	5
H-204	2.42	4	6	4
H-205	3.08	3	6	5
H-207	0.67	4	8	6
H-208	1.75	9	9	7
H-209	4	4	9	7
H-210	1.42	10	5	6
H-211	3.17	6	6	7
H-212	2.04	9	8	5
H-213	2.08	5	-	-
H-214	2.67	8	9	7
H-215	1.25	7	10	7
H-216	3.33	7	4	5
H-217	3	6	6	5
H-218	0	6	5	7
H-220	0.83	7	5	6
H-221	1	4	5	6
H-222	2.21	6	6	5
H-223	3.08	10	6	4
H-224	2.83	10	10	7
H-225	3	5	6	8
H-227	2.17	4	7	5
H-228	3.25	6	5	5
H-229	0.33	10	6	6
H-230	2.11	7	5	5
H-231	2.92	6	8	5
H-232	3.25	8	8	7
H-233	1.67	4	9	7
H-234	2.17	5	8	6
H-235	1.17	10	6	7
H-236	1.33	9	10	6
H-237	2.5	10	8	5
H-238	3.67	6	7	6
H-239	3	9	7	3
H-240	2.92	8	8	3
H-241	3.33	7	5	4
H-242	3.75	6	8	4
H-243	2.67	6	4	3
H-246	1.92	9	7	6
H-247	2.83	9	8	8
H-249	2.33	10	10	9
H-250	3	10	10	7
H-251	0	10	9	9
H-252	1.67	8	10	9
H-253	1.33	10	10	8
Hartog	2.5	7	7	6
HB88I-172	1.34	7	10	7
IG43428	3.42	9	10	9
KARAGAN	1	-	10	8
KAZAKHSTANSKAJA126	2.92	9	6	6
KHARCHIA65	2.58	8	9	6
KOPARA73	3.34	9	8	6
KORDCLPLUS	2.92	10	10	8
KZYL-SARK	3.5	7	7	6
LU26S	1.5	9	9	8
Mac	1	7	8	7
MAHONDEMIAS	3	7	8	5
NAJAH	1.08	9	8	8
NAPOSTA	2.25	10	7	6
ONOHOISKAJA4	3.17	10	10	7
PALESTINE8	2.33	10	10	5
PI178012	2.5	10	8	7
PI178704	1.75	7	7	5
PI180988	2.92	8	10	6
PI264952	3	9	10	6
POBEDA	3	9	8	6
PretoAmarelo	2.58	10	10	-
Revenue	3.33	10	10	8
SEAGULL	1.25	10	10	8
SELOFHOURANI27	3.34	8	10	6
SELOFHOURANI27	3.5	10	10	-
SKALA	2.5	10	10	6
SOCIEDADNACION	1.58	9	10	6
SONNENWEIZEN	1.17	10	10	8
SURHAK5688	3.42	-	10	9
SURHAKMESTNYJ	2.5	-	-	7
SW9550101	1.42	6	8	4
SW9550192	2.06	10	10	5
SW9550213	1.17	-	10	4
SW9550292	2.33	10	9	4
TAJAZNAJA4	2	9	8	2
TURCICUM1	2.33	-	-	-
VYS	0.92	10	10	-
W5013EY-11-1	1	9	10	7
W5228HZ-1	2.92	10	10	6
W5924DT-34	2.83	9	10	6
wheat-2HBYDV	2.75	7	10	7
WL-wheat	2.67	6	9	3
X-165	*	7	6	4
X-253	2	10	8	7
X-254	3	10	10	8
X-255	1	-	-	-
X-256	0	4	7	6
X-257	1	6	8	4
X-258	2.33	-	-	5
X-259	*	2	10	8
X-26	1	10	10	7
X-260	3	8	7	3
X-261	2.67	5	7	4
X-262	1	10	-	6
X-A	2.67	8	10	7
X-B	2.33	10	10	8
X-C	2.33	8	10	9
X-D	3.33	-	8	3
X-E	3	-	-	-
X-F	0.33	-	5	6
Yang17	2.75	-	8	5
Yannong15	2.58	-	10	6
Yannong19	2.42	-	9	3
YRODY1006	2.67	-	10	4
Yu-01	0.71	-	10	5
Yu-02	2	-	7	4
Yu-03	2.42	-	5	3
Yu-04	1.83	-	9	7
Yu-05	2.42	-	8	4
Yu-06	2.42	-	10	2
Yu-07	3.33	-	10	3
Yu-08	3	-	10	3
Yu-09	2.25	-	10	5
Yu-10	3.17	-	8	4
Yu-11	3	-	8	5
Yu-12	3.17	-	6	4
Yu-13	2.67	-	7	7
ZHONG4	1.42	-	10	7

## Sheet: S2-SNP
Table S2 Genotypic data
Marker	073/44	19401	19720	92FS-16	AEGYLOPS14257	AFGHANISTAN7	AHGAF	ALBIDUM24	Al-wheat	ARTEMOVKA	AUS19392	AUS19393	AUS19394	AUS19395	AUS19396	AUS19397	AUS19398	AUS19399	AUS19400	AUS19402	AUS19403	AUS19719	B-T-17	B-T-35	B-T-38	B-T-51	BUKOVINKA	CAZ53	E.M.S.SUMMIT70-8	EXITOB	FERRUGINEUM	FRETES	FRETES	FRETES	Glover	H-001	H-002	H-003	H-004	H-005	H-006	H-007	H-008	H-009	H-010	H-011	H-012	H-013	H-014
IWB24001	b	b	a	a	a	b	b	a	b	b	b	b	b	a	b	a	a	a	a	a	b	b	a	a	a	b	b	b	a	b	b	b	b	b	b	a	a	b	b	b	b	b	a	b	b	b	b	b	a
IWB7232	b	a	b	b	b	b	b	b	b	b	b	b	b	b	b	b	b	b	b	b	b	b	b	a	a	b	b	b	b	a	b	b	b	b	b	b	b	b	b	b	b	b	b	b	b	b	b	b	b
IWB24379	a	a	b	a	a	a	a	a	a	a	b	b	a	a	a	a	a	a	a	a	b	a	a	b	b	a	a	b	a	a	a	a	b	b	a	a	b	a	b	b	b	b	a	b	b	b	b	a	b
IWA140	b	b	b	b	b	b	b	b	b	b	b	b	a	b	b	b	b	b	b	b	b	b	b	b	b	b	b	b	b	b	b	b	b	b	b	b	a	b	b	b	b	b	b	b	b	b	b	b	b
IWB22279	b	a	a	a	a	a	a	a	a	a	a	a	a	a	a	a	a	a	a	a	a	a	a	a	a	a	a	a	a	a	a	a	a	a	a	a	a	a	a	a	a	a	a	a	a	a	a	a	a
IWB68807	b	a	b	b	a	a	a	b	b	a	a	b	b	b	b	b	b	b	b	b	b	b	b	b	b	b	b	b	b	b	b	b	b	b	a	b	a	a	b	b	b	b	b	a	b	b	b	b	b
IWA8137	a	b	a	a	b	b	b	a	a	a	a	b	a	a	a	a	b	b	b	a	a	a	b	a	a	a	a	a	a	a	a	a	a	a	a	a	a	a	a	a	a	a	a	a	a	a	a	a	a
IWB24968	a	b	a	a	a	a	a	a	b	b	a	a	b	a	a	a	a	a	a	a	a	b	a	a	a	a	a	a	a	a	b	a	a	a	b	b	a	a	a	a	a	a	a	a	a	a	a	a	a
IWA3625	b	a	b	b	b	b	b	b	a	a	b	b	a	b	b	b	b	b	b	b	b	a	b	b	b	b	b	b	b	b	a	b	b	b	a	a	a	b	b	b	b	b	b	b	b	b	b	b	b
IWB61301	a	a	b	a	a	a	a	b	a	a	a	a	a	a	b	a	a	a	a	b	a	a	a	b	a	b	b	a	a	b	a	a	a	a	a	a	a	b	a	a	a	a	b	a	a	a	a	b	a
IWB74584	b	b	b	a	b	b	b	a	a	b	b	b	b	b	b	a	b	b	a	a	a	b	a	a	b	a	a	a	a	b	a	b	b	b	b	b	b	b	b	b	a	b	b	a	a	b	a	b	b
IWB63190	b	b	b	b	b	b	b	a	b	b	b	b	b	b	b	b	b	b	b	b	b	b	a	b	b	b	b	b	b	b	a	b	b	b	b	b	b	b	b	b	b	b	b	b	b	b	b	b	a
IWA4318	a	b	b	a	a	b	b	b	b	b	b	b	a	b	a	b	a	a	a	b	a	b	a	a	b	b	b	a	b	b	a	a	a	a	b	b	b	a	a	a	a	a	a	a	a	a	a	a	a
IWA4355	b	b	b	a	a	a	a	a	b	b	b	b	a	a	a	a	a	a	a	b	b	b	a	a	b	b	a	b	a	b	b	b	b	b	b	b	b	b	b	b	b	b	b	b	b	b	b	a	b
IWB59530	a	a	a	b	b	b	b	a	a	a	b	b	b	b	a	b	a	a	b	a	a	b	a	a	a	a	a	a	b	a	b	a	b	b	b	a	a	b	b	a	b	a	a	b	b	b	b	a	b
IWA842	b	b	b	b	b	b	b	b	b	b	a	b	b	b	a	b	b	b	b	b	b	b	b	b	b	b	b	b	b	b	b	b	b	b	b	b	b	b	b	b	b	a	b	b	b	b	a	b	b
IWB53766	b	b	b	b	b	b	b	b	b	b	b	b	b	b	b	b	b	b	b	a	b	b	a	b	b	b	b	b	b	a	b	b	a	a	b	b	b	b	b	b	b	b	b	b	b	b	b	b	b
IWB62731	a	a	b	b	b	b	b	b	b	b	b	b	b	b	a	b	b	b	b	b	b	b	b	a	a	b	b	b	b	b	a	a	a	a	b	b	b	b	b	b	b	b	b	b	b	b	b	b	b
IWB40094	b	b	b	b	b	b	b	a	b	b	a	a	b	b	b	b	b	b	b	b	b	b	a	b	a	b	b	b	b	b	b	b	b	b	a	b	a	b	b	b	b	b	b	b	b	b	b	b	b
IWB49467	a	a	a	a	a	a	a	b	a	a	a	a	a	a	a	a	a	a	a	a	a	b	b	a	a	a	a	a	a	a	a	a	a	a	a	a	a	b	a	a	a	a	a	a	a	a	a	a	a
IWB35833	a	b	a	a	a	a	a	a	a	a	a	a	a	a	a	a	a	a	a	a	a	a	a	b	b	a	a	a	a	b	a	a	a	a	a	a	a	a	a	a	a	a	a	a	a	a	a	a	a
IWB64154	b	b	a	b	b	a	a	a	b	b	a	a	a	a	a	a	b	b	b	b	a	a	b	a	b	b	b	a	a	b	a	a	a	a	b	a	a	a	a	a	a	a	b	a	a	b	a	b	b
IWB60070	a	b	a	a	b	b	b	b	a	b	a	a	a	b	a	a	b	b	b	a	a	b	a	a	a	a	a	a	b	a	b	a	a	a	b	a	a	a	a	a	a	a	a	a	a	a	a	a	a
IWB51225	a	b	a	a	b	a	a	b	b	a	b	a	b	a	b	b	b	b	b	b	b	b	b	b	b	b	b	b	a	b	b	b	b	b	b	b	b	b	b	b	b	b	b	b	b	b	b	b	b
IWA696	b	a	a	b	b	a	a	b	b	b	a	b	b	b	a	b	b	b	b	a	b	b	b	b	b	b	a	b	b	b	a	a	a	a	b	a	a	b	b	b	b	b	a	a	b	a	b	a	a
IWB73945	b	a	b	a	b	a	a	a	b	b	a	a	b	a	b	-	b	b	a	b	b	b	a	a	a	a	a	a	b	a	b	b	b	b	a	b	a	b	b	b	b	b	b	b	b	b	b	b	a
IWB75028	b	b	b	b	b	b	b	b	b	b	b	a	b	a	b	b	b	b	b	b	a	b	b	a	b	a	b	a	a	b	a	b	a	a	b	a	b	b	b	a	a	b	b	b	a	a	b	b	b
IWB13336	b	b	b	b	b	b	b	b	b	b	b	b	b	b	b	b	b	b	b	b	b	b	b	b	b	b	b	b	b	b	a	a	a	a	b	a	a	a	a	b	b	b	b	b	a	b	a	b	a
IWB64596	b	b	b	b	b	b	b	b	b	b	b	b	b	b	b	b	b	b	b	b	b	b	b	b	b	b	b	b	b	b	a	b	b	b	b	b	b	a	b	b	b	b	b	b	b	a	b	b	b
IWB7161	a	b	a	a	a	b	b	a	b	b	b	a	a	a	b	a	a	a	a	b	b	b	b	b	a	a	a	b	a	a	b	a	a	a	b	b	b	b	a	b	b	a	a	a	b	b	b	b	b
IWB45877	b	a	a	a	a	a	a	a	a	a	a	a	a	a	a	a	a	a	a	a	a	a	a	a	b	a	a	a	a	b	a	b	b	b	a	a	a	a	a	a	a	a	a	a	a	a	a	a	a
IWB7914	b	b	a	b	a	a	a	b	b	b	b	a	a	a	a	b	a	a	a	b	a	b	a	a	a	a	a	a	a	a	b	a	a	a	b	b	b	b	b	b	b	b	a	b	b	b	b	a	b
IWB46201	a	a	b	b	a	a	a	b	a	b	b	b	b	b	a	b	b	b	a	b	a	b	b	b	b	b	a	b	a	b	a	b	b	b	b	b	b	b	a	a	b	a	b	b	b	b	b	b	b
IWB38771	a	b	b	b	b	b	b	b	b	b	a	b	b	b	a	b	b	b	b	b	b	b	b	a	a	b	b	b	b	b	b	b	b	b	b	b	b	b	a	a	b	b	a	b	a	a	b	a	b
IWB66885	a	b	a	b	a	b	b	a	a	a	b	a	a	b	a	b	b	b	a	a	a	a	a	b	a	a	a	a	a	a	a	a	a	a	a	a	a	b	a	a	a	a	a	a	a	a	b	a	a
IWB9381	a	a	b	a	a	a	a	a	b	a	a	b	b	a	b	a	a	a	a	b	b	b	b	a	b	a	a	b	b	b	b	b	b	b	a	b	a	b	b	b	b	b	b	b	b	b	b	b	b
IWA5141	a	a	b	a	b	b	b	b	b	a	a	a	b	b	b	a	a	a	a	b	b	b	b	b	b	b	b	b	b	a	b	b	b	b	b	b	b	b	b	b	b	b	b	b	b	b	b	b	b
IWB24314	b	b	a	a	a	a	a	a	a	b	b	a	b	a	a	a	b	b	b	b	b	b	b	a	b	b	b	a	a	b	b	b	b	b	b	b	b	b	a	b	b	b	a	b	b	b	b	b	b
IWB36267	a	a	a	b	a	b	b	a	b	b	a	a	b	a	b	b	b	b	a	b	b	b	a	b	a	b	b	b	b	b	b	a	a	a	b	b	b	b	b	b	b	b	b	a	b	a	b	b	b
IWB59762	a	b	b	b	b	b	b	b	b	b	b	a	b	b	b	b	b	b	b	b	b	b	b	b	a	b	a	b	b	a	a	b	b	b	b	b	b	b	b	b	b	b	a	b	b	b	b	a	b
IWB16884	b	b	b	b	b	b	b	b	b	b	b	b	b	b	b	b	b	b	b	b	b	b	b	b	b	b	b	b	b	b	b	b	b	b	b	b	b	b	b	b	b	b	b	b	b	b	b	b	b
IWB27344	a	a	b	b	b	b	b	b	b	a	a	b	a	b	b	b	a	a	a	a	a	a	a	b	a	a	a	b	b	a	a	a	a	a	a	a	a	a	b	a	a	a	b	a	a	a	a	a	a
IWB55525	b	a	a	a	a	a	a	a	a	a	a	a	a	a	a	a	a	a	a	a	a	a	b	b	a	b	b	a	a	b	a	a	a	a	a	a	a	b	a	a	a	a	a	a	a	a	a	a	a
IWB62606	b	b	b	b	b	b	b	a	b	b	b	b	a	b	b	b	b	b	b	b	b	b	b	b	b	b	b	b	b	b	b	b	b	b	b	a	b	b	b	b	b	b	b	b	b	b	b	b	b
IWB48533	b	b	b	b	b	b	b	b	b	b	a	b	b	b	b	b	b	b	b	b	b	a	b	b	b	b	b	b	b	b	b	b	b	b	b	a	a	b	b	b	b	b	b	b	b	b	b	b	b
IWB19788	b	a	b	b	b	b	b	b	a	b	b	b	b	b	b	b	b	b	b	b	b	b	b	b	b	b	a	b	b	b	b	b	b	b	a	b	b	b	b	b	b	b	b	b	b	b	b	b	b
IWA6026	a	a	a	a	a	a	a	b	b	a	a	a	b	a	a	a	a	a	a	b	a	b	b	a	a	a	b	b	b	b	a	b	b	b	a	b	a	a	a	a	a	b	a	a	a	a	b	b	b
IWB27206	b	b	b	b	b	b	b	a	b	b	b	b	b	b	b	b	b	b	b	b	b	b	b	b	a	b	a	b	b	b	b	b	b	b	b	b	b	b	b	b	b	b	b	b	b	b	b	b	b
IWB63191	a	a	a	a	a	a	a	a	a	a	a	a	a	b	a	a	a	a	a	a	a	a	a	b	a	a	a	a	b	a	a	a	a	a	a	b	a	a	a	a	a	a	b	a	a	a	a	a	a
IWA7259	b	a	a	a	a	b	b	a	a	a	a	a	b	a	a	a	a	a	a	b	a	b	a	a	a	a	b	a	b	a	a	a	a	a	b	b	a	a	b	b	b	b	a	b	b	b	b	a	a
IWB55652	b	b	b	b	b	b	b	b	a	b	b	b	b	b	b	b	b	b	b	b	b	b	a	a	b	a	a	b	b	b	b	b	b	b	b	b	a	b	b	b	b	b	b	b	b	b	b	b	b
IWB68776	a	a	b	b	a	a	a	a	b	a	a	b	a	b	b	a	a	a	b	a	b	a	b	a	a	a	a	a	b	a	b	a	a	a	a	b	a	b	a	a	a	b	b	a	a	a	b	b	b
IWB55956	b	a	b	a	b	b	b	a	a	a	a	b	b	b	b	a	b	b	b	a	b	a	a	b	b	a	b	b	b	b	b	b	b	b	a	a	b	a	b	b	b	b	b	b	b	b	b	a	a
IWA7595	a	b	a	b	b	b	b	a	b	b	b	a	a	a	a	b	b	b	b	b	a	b	a	a	a	a	a	b	b	a	b	a	a	a	b	a	b	b	a	b	b	b	a	b	b	b	a	b	b
IWB69438	b	a	b	b	b	b	b	b	b	b	b	b	b	b	b	b	b	b	b	b	b	b	b	b	b	a	b	b	b	b	b	b	b	b	b	b	b	b	b	a	b	b	b	b	b	b	b	b	b
IWA1366	b	a	b	b	b	b	b	b	a	b	b	b	b	b	b	b	b	b	b	b	b	b	a	b	b	a	a	b	b	a	b	b	b	b	a	a	a	b	b	b	b	b	b	b	b	b	b	b	a
IWB34845	a	a	b	b	b	b	b	b	b	b	b	b	b	b	a	b	b	b	b	b	b	a	b	b	b	b	b	b	b	b	b	a	b	b	a	b	b	b	b	b	b	b	b	b	b	b	b	b	b
IWB45424	a	a	a	a	a	a	a	b	a	a	a	a	a	a	a	a	a	a	a	a	a	a	a	a	a	a	a	a	a	a	a	a	a	a	a	a	a	a	a	a	a	a	a	a	a	a	a	a	a
IWB34609	a	b	a	a	b	a	a	b	b	b	a	a	a	a	b	b	a	a	b	a	a	a	a	a	a	a	b	a	a	a	a	a	a	a	b	a	a	a	a	a	a	a	b	a	a	b	a	b	a
IWB65728	a	a	a	a	a	a	a	a	a	a	a	b	b	a	a	a	a	a	a	a	a	b	b	a	a	a	b	a	a	b	a	a	a	a	a	a	a	a	a	a	a	a	a	a	a	a	a	a	b
IWB43651	b	a	a	a	a	a	a	a	a	a	a	b	b	b	a	a	a	a	a	a	a	b	a	b	a	b	a	a	a	a	a	b	b	b	a	a	b	a	a	a	a	a	a	a	a	a	a	a	b
IWA558	a	b	a	a	a	a	a	a	a	b	b	a	a	a	a	a	a	a	a	a	a	a	a	a	b	a	a	a	a	b	a	b	b	b	a	b	b	a	a	a	a	a	a	a	a	a	a	a	a
IWB59451	a	b	b	b	b	b	b	a	b	b	b	a	b	a	b	b	b	b	b	b	b	a	b	b	b	b	b	b	b	b	b	a	b	b	b	b	b	b	b	b	b	b	b	b	b	b	b	b	b
IWA6461	b	a	b	b	a	a	a	a	a	b	a	a	a	b	a	a	a	a	b	a	a	b	a	b	b	b	a	b	a	a	a	a	a	a	a	a	a	a	b	a	a	b	a	b	b	b	a	b	b
IWB34690	b	b	b	b	b	a	a	a	b	a	a	a	b	b	a	a	b	b	b	a	b	b	b	b	a	b	a	a	b	b	b	a	a	a	b	a	a	b	a	a	a	a	a	a	a	a	a	b	a
IWB43972	a	a	b	a	a	a	a	a	b	a	a	b	a	a	a	a	a	a	a	a	a	b	a	a	b	b	a	a	a	b	b	a	a	a	a	a	a	a	a	a	a	a	a	a	a	a	a	b	b
IWB34578	a	a	b	b	b	b	a	a	a	a	a	a	a	b	b	a	b	b	a	b	a	a	b	a	a	a	a	a	a	b	a	a	a	a	a	b	b	a	a	a	a	a	a	a	a	a	a	a	a
IWB37671	b	a	b	b	b	a	a	a	a	a	a	a	b	b	b	a	b	b	b	b	b	b	b	a	a	b	b	a	b	b	b	b	b	b	a	a	a	b	b	b	b	b	b	b	b	b	b	b	b
IWA6523	b	b	a	b	a	a	a	a	a	b	a	a	a	a	a	a	a	a	a	b	a	a	a	a	a	b	a	b	a	b	a	b	b	b	a	a	b	b	a	a	a	a	a	a	a	b	a	a	a
IWB43405	a	b	a	b	b	b	b	b	a	b	b	a	b	b	a	b	b	b	b	b	b	a	b	b	b	b	b	b	b	b	a	a	a	a	b	b	b	b	b	b	b	b	a	b	b	b	b	a	b
IWB52869	a	b	a	a	a	a	a	b	b	a	a	a	a	a	a	a	a	a	a	a	a	a	b	b	b	b	b	a	b	a	b	b	b	b	b	b	b	b	a	a	a	a	b	a	a	a	a	b	b
IWA5394	b	a	b	b	b	b	b	a	a	b	b	b	b	b	b	b	b	b	b	b	b	b	a	a	a	a	a	b	a	b	a	a	a	a	a	a	a	a	b	b	b	b	a	b	b	b	b	a	a
IWB3848	b	b	b	b	a	a	a	a	b	b	a	b	b	a	b	a	a	a	a	b	b	b	b	a	a	b	a	b	a	a	b	a	a	a	b	b	b	b	b	b	b	a	b	a	b	b	b	b	b
IWA3905	b	a	a	b	b	a	a	a	a	a	a	a	b	a	b	a	b	b	b	a	b	a	b	b	a	a	a	b	a	a	b	b	b	b	a	a	a	b	b	b	b	b	b	b	b	b	b	b	b
IWB22717	a	b	a	a	a	b	b	b	b	b	b	b	a	a	a	b	a	a	a	a	a	a	a	b	b	a	a	b	a	a	a	a	a	a	b	b	b	a	a	a	a	a	a	a	a	a	a	a	a
IWB43740	b	b	b	b	b	a	a	a	a	a	a	a	a	a	b	a	b	b	a	b	a	b	a	b	a	a	b	a	a	a	b	b	b	b	b	a	a	a	a	a	a	a	b	a	a	a	a	b	b
IWB69455	b	b	a	a	a	b	b	b	b	b	a	a	a	a	b	b	a	a	a	a	a	b	a	a	b	a	a	b	a	a	b	a	a	a	b	b	a	b	b	b	b	a	a	b	b	b	b	a	a
IWB9074	b	a	b	a	a	b	b	a	b	b	b	a	b	b	b	b	b	b	a	b	b	a	a	a	b	b	b	b	a	b	b	b	b	b	b	b	b	a	b	a	b	b	a	b	a	b	b	b	b
IWB40065	b	b	b	b	b	b	b	b	a	b	b	b	b	a	a	b	b	b	b	b	b	b	a	a	b	b	b	b	b	b	b	b	b	b	a	a	b	b	b	a	b	b	b	b	b	b	b	b	a
IWB22443	b	b	b	b	b	b	b	b	b	b	b	b	b	b	b	b	b	b	b	b	b	b	b	b	b	b	b	b	a	b	b	b	b	b	b	b	b	b	b	b	b	b	b	b	b	b	b	b	b
IWB55566	a	a	b	a	b	b	b	a	b	b	b	a	a	b	a	a	a	a	b	b	b	b	b	a	b	a	b	b	b	b	b	b	b	b	b	b	a	b	b	b	b	b	a	b	b	b	b	b	b
IWB74922	b	a	a	a	a	a	a	b	b	a	a	b	b	b	b	a	a	a	a	b	b	b	b	b	a	b	a	b	b	b	b	b	b	b	a	b	a	b	b	b	b	b	b	b	b	b	b	b	a
IWB21869	a	b	a	b	b	b	a	b	b	a	b	a	b	b	b	a	a	a	a	b	b	b	b	b	b	b	b	b	a	b	a	a	a	a	b	b	b	b	b	b	b	b	b	b	b	b	b	b	b
IWB22089	b	b	b	a	b	b	b	b	a	a	b	a	b	b	a	a	a	a	a	b	a	a	a	a	a	a	b	a	b	a	b	a	b	a	a	b	a	b	a	a	a	b	a	b	a	b	b	a	a
IWA4949	a	a	a	b	a	b	b	a	a	a	a	a	a	a	a	b	b	b	b	b	a	a	a	a	a	b	a	a	a	a	a	a	b	b	a	a	a	a	a	a	a	a	b	a	a	a	a	b	b
IWB32974	a	b	a	b	b	a	a	a	a	b	a	a	a	a	a	b	b	b	b	a	a	b	b	a	a	b	b	a	a	a	a	a	a	a	b	b	b	b	b	b	b	a	a	a	a	a	a	a	a
IWA1049	a	b	b	b	b	b	b	b	b	b	b	a	b	b	b	b	b	b	b	b	a	a	b	a	b	b	a	b	b	b	b	b	b	b	b	b	b	b	a	b	b	b	b	b	b	b	a	b	b
IWB6165	b	b	b	b	b	a	a	a	b	b	a	a	a	b	a	b	b	b	b	b	b	b	b	a	b	b	b	b	b	a	a	b	b	b	b	b	b	b	b	b	b	b	a	b	b	a	b	a	b
IWA2933	a	a	a	a	a	a	a	b	a	a	a	a	b	a	a	a	a	a	a	a	a	a	b	b	a	a	a	a	a	b	a	a	a	a	a	a	a	a	a	a	a	a	a	a	a	a	a	a	a
IWB25592	b	a	b	a	a	a	a	a	a	b	b	a	b	a	b	a	a	a	a	b	b	b	b	b	a	a	b	b	a	b	b	b	b	b	a	a	a	b	b	b	b	b	b	b	b	a	b	a	b
IWB5378	b	b	b	b	b	b	b	b	b	b	b	a	a	b	b	b	b	b	b	a	b	a	a	b	a	b	b	b	b	a	b	b	b	b	b	b	a	b	b	b	b	b	b	b	b	a	b	b	b
IWB24128	b	b	b	b	b	b	b	a	b	a	b	a	b	b	a	b	b	b	b	b	b	a	b	a	b	a	b	b	b	b	b	a	b	b	a	a	a	a	b	b	b	b	b	b	b	b	b	a	a
IWA1632	b	a	b	b	a	b	b	b	b	b	b	a	a	b	b	b	b	b	a	b	b	a	a	b	b	b	b	a	a	a	a	b	b	b	a	b	a	a	b	b	a	a	b	a	b	b	a	b	b
IWB59306	a	b	a	a	a	a	a	a	a	b	b	a	a	a	a	a	a	a	b	a	a	b	b	a	a	a	a	a	a	a	b	a	a	a	a	b	a	a	a	a	a	a	a	a	a	a	a	a	a
IWB60019	a	a	a	a	a	b	b	a	a	a	a	b	a	b	b	a	a	a	a	b	b	b	b	a	a	b	b	b	b	b	a	b	b	b	b	b	b	b	b	b	b	b	b	b	b	b	b	b	b
IWB10199	a	a	b	b	b	b	b	b	b	b	a	b	a	b	a	b	a	a	b	b	a	a	b	b	b	b	b	a	b	b	a	a	a	a	b	a	b	a	a	a	a	a	b	a	b	a	b	b	b
IWA7056	b	b	a	a	a	b	b	b	a	b	b	b	b	a	b	a	b	b	a	a	b	b	b	b	b	a	a	b	b	b	b	a	b	b	b	b	a	b	b	b	b	b	a	b	b	b	b	a	a
IWB60101	b	b	a	b	b	b	b	b	b	b	b	b	b	b	b	b	b	b	b	b	b	a	a	a	a	b	b	b	b	a	b	b	b	b	b	b	b	a	a	b	b	b	b	b	b	b	b	b	a
IWB46921	a	a	b	b	a	b	b	b	b	a	a	b	b	a	b	b	b	b	b	b	b	b	a	b	b	b	b	b	a	b	a	a	a	a	a	b	b	b	b	b	b	b	b	b	b	b	b	b	a
IWB54808	b	b	b	b	b	b	b	b	b	b	b	b	b	b	b	b	b	b	b	b	b	b	b	b	b	b	b	b	b	b	a	b	b	b	b	b	b	b	b	b	b	b	b	b	b	b	b	b	b
IWB59676	a	b	b	a	a	b	b	b	b	b	b	b	a	b	b	a	b	b	b	b	b	a	b	b	b	a	b	a	a	a	b	a	a	a	b	b	b	a	b	b	b	a	b	a	a	b	b	b	b
IWB2626	b	a	a	a	a	a	a	a	a	a	a	a	a	a	a	a	a	a	a	b	a	a	a	a	a	a	a	b	a	a	a	b	b	b	a	a	a	a	b	a	a	a	a	b	b	a	a	a	a
IWB38869	a	b	b	b	b	b	b	a	a	b	b	b	a	b	b	b	b	b	b	b	b	b	b	a	a	b	b	b	b	b	a	b	b	b	b	a	a	b	b	b	b	b	b	b	b	b	b	b	b
IWB47762	b	b	a	a	a	a	a	b	b	a	a	a	a	a	b	a	a	a	a	a	a	a	a	b	b	a	a	a	a	a	a	b	b	b	a	a	a	a	a	a	a	a	a	a	a	a	a	a	a
IWB12655	b	a	a	b	b	b	b	a	b	b	a	b	a	b	a	b	b	b	b	b	b	b	a	b	a	b	b	b	b	a	b	b	b	b	a	a	a	b	b	b	b	b	b	b	b	b	b	a	a
IWB996	b	b	b	a	a	a	a	b	b	a	b	a	b	b	b	a	a	a	a	b	b	b	b	a	b	b	a	b	b	b	b	b	b	b	b	b	b	b	b	b	b	b	b	b	b	b	b	b	b
IWB53451	b	a	a	a	a	a	a	a	b	a	a	a	b	b	a	a	a	a	a	a	a	b	b	b	b	a	a	a	b	b	a	a	a	a	a	b	a	a	a	a	a	a	a	a	a	a	a	a	a
IWB7759	b	a	a	b	a	a	a	a	a	a	a	a	b	b	a	a	a	a	b	a	a	a	a	a	b	b	a	b	b	b	b	a	a	a	a	b	b	a	b	b	b	a	b	b	b	b	a	a	b
IWA6475	b	a	a	a	b	b	b	a	a	b	b	b	b	a	b	a	b	b	b	a	b	a	b	a	a	b	a	b	b	a	a	b	b	b	a	a	b	a	b	b	b	b	a	b	b	b	b	a	a
IWA2513	a	a	b	a	a	a	a	a	b	a	b	a	a	a	b	a	a	a	a	a	a	b	a	a	a	b	a	a	b	a	a	a	a	a	b	b	b	b	a	a	a	a	b	a	a	a	a	a	b
IWA8075	a	b	b	a	a	a	a	a	b	a	b	a	a	b	a	a	b	b	a	a	a	a	a	a	a	a	b	b	b	a	a	a	a	a	b	a	a	a	a	a	a	a	a	a	a	a	a	b	a
IWB35112	b	b	b	b	b	b	b	b	b	b	b	b	b	b	b	b	b	b	b	b	b	b	b	b	b	a	b	b	b	b	b	b	b	b	b	b	b	b	b	b	b	b	b	b	b	b	b	b	b
IWB15255	a	a	a	a	a	a	a	a	a	a	a	a	a	a	a	a	a	a	a	a	a	a	a	a	a	a	a	a	a	a	a	a	a	a	a	a	a	a	a	a	a	a	a	a	a	a	a	a	a
IWB57014	a	a	a	b	a	b	b	b	b	a	b	a	a	a	b	b	b	b	a	a	b	b	a	a	a	b	a	a	a	a	a	a	a	a	a	a	b	a	a	a	a	a	a	a	a	a	a	a	a
IWA275	b	a	b	b	b	b	b	a	b	b	b	b	a	a	b	a	b	b	b	b	a	a	a	a	b	b	a	a	a	a	a	b	b	b	a	a	a	a	a	a	a	a	a	a	a	a	a	a	a
IWA1353	a	b	b	a	a	a	a	b	b	a	a	a	b	a	b	a	a	a	a	b	b	b	b	b	a	b	b	b	a	a	a	a	a	a	b	a	a	b	b	a	b	a	b	a	b	b	b	a	a
IWB29152	a	a	b	b	b	b	b	b	b	b	b	a	b	a	b	b	b	b	b	b	b	a	b	b	b	a	a	b	b	b	b	b	b	b	a	a	b	b	b	a	b	b	b	b	b	b	b	b	b
IWA7828	b	b	b	b	b	b	b	a	b	b	b	b	b	a	b	b	b	b	b	b	b	a	b	b	b	a	b	a	a	b	a	b	b	b	b	b	b	b	b	b	b	b	b	b	b	b	b	b	b
IWB65607	a	b	a	a	a	a	a	b	b	a	b	a	b	a	b	a	a	a	a	b	b	b	b	b	b	b	b	b	a	b	b	b	b	b	b	b	b	b	b	b	b	b	b	b	b	b	b	b	b
IWB30161	b	a	a	b	b	a	a	b	a	b	b	a	a	a	a	b	b	b	b	a	b	a	a	a	b	a	a	a	a	b	b	a	a	a	a	a	a	a	a	a	b	a	a	a	b	b	a	a	a
IWB47132	a	a	a	b	b	b	b	b	a	b	b	a	b	a	a	b	b	b	b	a	b	a	a	a	b	a	a	a	a	b	b	a	a	a	a	a	b	b	b	b	b	b	b	b	b	b	b	a	b
IWB26466	a	b	a	a	a	b	b	a	a	a	a	a	b	a	a	a	a	a	a	b	b	b	a	b	b	a	a	b	a	b	b	a	a	a	a	a	a	a	b	b	b	b	b	b	b	b	b	a	a
IWB11427	b	b	a	a	b	a	a	b	b	a	b	a	a	b	b	b	b	b	b	b	b	b	a	a	a	b	b	b	b	b	b	b	b	b	b	b	a	b	b	b	b	b	b	b	b	b	b	b	b
IWB4355	b	a	a	b	b	a	a	b	a	b	b	a	b	a	a	b	b	b	b	b	b	a	a	a	b	a	a	a	a	b	b	a	a	a	a	b	b	a	b	b	b	b	b	b	b	b	b	a	b
IWB24089	a	b	a	b	a	a	a	a	b	a	b	b	b	a	a	a	a	a	a	b	b	b	b	b	b	a	a	b	a	a	a	a	a	a	b	a	b	b	b	a	b	a	a	b	b	b	a	a	a
IWB31756	b	a	a	b	b	a	a	b	a	b	b	a	b	a	a	b	b	b	b	b	b	a	a	a	b	a	a	b	a	b	b	b	b	b	a	b	b	a	b	b	b	b	b	b	b	b	b	a	a
IWB71887	a	a	a	a	a	a	a	a	a	a	a	a	a	a	a	a	a	a	a	a	b	a	a	a	a	a	a	a	a	a	b	a	a	a	a	a	a	a	b	b	b	a	b	b	b	b	a	a	a
IWA2221	a	b	a	a	a	a	a	a	b	a	a	a	b	a	a	a	a	a	a	a	b	a	a	b	a	b	a	b	a	a	b	a	a	a	b	a	b	a	b	b	b	b	b	b	b	b	b	a	a
IWB16228	-	b	b	a	a	b	b	a	b	b	a	b	b	a	a	a	a	a	a	b	b	b	b	b	b	a	b	b	a	b	a	b	b	b	b	b	b	b	b	b	b	b	b	b	b	b	b	a	a
IWB25932	a	b	b	a	b	b	b	b	a	b	b	b	a	b	a	a	b	b	b	a	b	b	a	b	b	a	b	b	b	a	b	a	b	b	b	a	b	a	b	b	b	b	a	b	b	b	b	a	b
IWB50050	b	b	b	a	a	b	b	a	b	a	a	b	a	b	b	a	a	a	a	a	a	b	b	b	b	b	b	b	b	b	a	b	b	b	b	a	a	b	a	a	a	a	a	a	a	a	a	b	a
IWB11877	b	a	b	b	b	b	b	b	b	b	b	b	b	b	b	b	b	b	b	b	b	b	b	a	a	b	b	b	b	a	b	b	b	b	b	b	b	b	b	b	b	b	b	b	b	b	b	b	b
IWB14749	b	a	b	b	b	b	b	b	a	b	b	b	a	b	b	b	b	b	b	a	b	b	b	b	b	a	b	b	b	b	b	b	b	b	b	a	a	b	b	b	b	b	b	b	b	b	b	a	a
IWB57634	b	a	b	b	a	b	b	a	a	b	a	b	a	b	a	a	a	a	a	a	a	a	a	a	a	a	a	a	b	a	a	a	a	a	a	a	a	a	a	b	a	b	a	a	a	a	a	a	a
IWB25239	a	a	b	b	b	a	a	b	a	b	b	a	b	a	b	b	b	b	b	a	b	a	b	a	a	a	a	b	a	a	b	b	b	b	a	a	b	b	b	b	b	b	b	b	b	b	b	b	b
IWA188	b	b	b	a	a	a	a	a	b	a	a	b	b	b	b	a	a	a	a	b	b	b	b	b	b	b	b	b	b	b	b	b	b	b	b	b	b	a	b	b	b	b	b	b	b	b	b	b	a
IWA8392	a	b	b	a	a	b	b	a	b	a	a	b	a	b	b	a	a	a	a	a	a	b	b	b	a	b	b	a	b	a	a	b	b	b	b	a	a	b	a	a	a	a	a	a	a	a	a	b	b
IWB51889	a	a	b	a	a	a	a	a	a	a	a	a	b	a	b	a	a	a	a	a	b	a	a	a	a	a	a	b	a	a	b	a	a	a	a	a	b	b	b	b	b	b	b	b	b	b	b	b	b
IWB35143	b	b	b	b	b	b	b	a	b	b	b	b	b	b	a	b	b	b	b	b	a	b	a	a	b	b	b	a	b	b	b	b	b	b	b	b	a	a	a	b	a	b	b	a	a	b	a	b	b
IWB4839	a	a	a	a	a	a	a	b	a	b	b	a	a	a	a	a	a	a	a	a	b	a	a	a	b	a	a	a	a	b	a	b	b	b	a	b	b	a	a	a	a	a	a	a	a	a	a	a	a
IWB1242	a	b	a	a	a	a	a	a	b	a	b	b	a	a	a	a	a	a	a	b	a	a	b	a	a	b	a	a	a	b	a	a	a	a	b	a	b	a	a	a	a	a	a	a	a	b	a	a	b
IWB49423	-	b	a	a	a	a	b	a	a	b	a	a	a	a	a	a	a	a	a	a	a	a	a	b	b	a	a	a	a	b	a	a	a	a	a	a	a	a	a	a	a	a	a	a	a	a	a	a	a
IWA7533	a	b	a	a	a	b	b	b	b	a	a	b	b	a	a	a	a	a	a	a	b	b	a	a	b	a	b	b	a	b	a	b	b	b	b	b	b	a	b	b	b	b	b	b	b	b	b	a	b
IWB72589	b	b	b	b	b	b	b	b	b	b	b	b	b	b	b	b	b	b	b	b	b	b	b	b	b	b	b	b	b	b	b	a	a	a	b	b	b	b	b	b	b	b	b	b	b	b	b	b	b
IWB13911	b	a	b	b	a	b	b	b	a	b	b	b	b	b	a	b	a	a	-	a	b	b	b	b	b	b	a	b	b	b	a	a	a	a	b	b	b	b	b	b	b	b	a	b	b	b	b	a	a
IWB67348	b	a	b	a	a	a	a	a	b	a	a	b	a	a	b	a	a	a	a	a	b	b	a	a	b	a	b	b	a	b	a	b	b	b	b	a	a	a	b	a	a	b	a	a	b	a	b	a	a
IWB65422	a	b	b	a	a	a	a	a	b	a	a	a	a	a	a	a	a	a	a	a	a	a	a	b	-	b	b	a	a	a	a	b	b	b	a	a	a	a	a	a	a	a	b	a	a	a	a	b	b
IWB5767	b	b	b	a	a	a	a	b	b	b	b	a	a	a	a	a	a	a	a	a	a	b	b	b	a	a	a	b	a	b	b	a	a	a	b	a	b	b	a	a	a	b	a	b	a	b	b	a	b
IWB59938	b	a	b	b	b	b	b	b	a	b	a	a	b	b	b	b	b	b	b	a	b	b	a	b	b	a	b	b	b	a	b	b	b	b	a	b	a	b	b	b	b	b	b	b	b	a	b	b	a
IWB28070	b	b	b	b	b	a	a	b	b	a	b	b	a	b	a	b	a	a	a	b	b	b	b	b	b	a	a	b	b	b	b	a	b	b	b	b	b	b	b	b	b	b	b	b	b	b	b	b	b
IWB43854	b	a	a	a	a	a	a	b	b	a	a	a	a	a	a	a	a	a	a	a	a	a	b	b	a	b	a	a	a	a	a	a	a	a	b	a	b	a	a	a	a	a	a	a	a	a	a	a	a
IWB52134	b	b	a	b	b	b	b	b	a	b	b	a	a	b	b	b	b	b	b	a	b	a	a	b	a	b	b	b	b	b	b	a	a	a	b	a	b	a	b	b	b	b	b	a	b	a	b	a	a
IWB40021	b	a	b	a	b	b	b	a	a	a	a	b	b	b	b	a	a	a	b	b	b	a	a	a	a	b	b	b	b	b	b	b	b	b	a	b	a	b	b	b	b	b	b	b	b	b	b	b	a
IWB36583	a	a	a	a	a	a	a	a	a	a	a	a	b	a	a	a	a	a	a	a	b	a	b	a	a	b	b	a	a	a	b	a	a	a	a	b	a	a	b	b	b	b	b	b	a	b	b	a	b
IWA8478	a	a	b	b	a	b	b	a	a	b	b	a	a	a	b	b	b	b	b	a	a	a	a	a	a	a	b	a	a	b	a	b	b	b	b	a	b	a	b	a	b	a	b	a	a	a	b	b	a
IWB34673	a	b	b	a	a	a	a	a	b	a	a	b	b	b	b	a	a	a	a	b	b	b	b	b	b	b	a	a	a	a	a	b	b	b	a	b	a	a	a	a	a	b	b	a	a	a	a	a	b
IWB32120	a	b	a	a	a	a	a	a	a	a	a	a	a	a	a	a	a	a	a	a	a	a	a	a	a	b	a	a	a	a	b	a	a	a	a	b	b	a	a	a	a	a	a	a	a	a	a	a	a
IWB43278	a	b	a	a	b	b	b	b	a	b	a	a	a	a	a	a	a	a	a	a	a	b	a	b	b	b	a	b	a	a	a	a	a	a	b	b	b	a	a	a	a	a	a	a	a	a	a	a	a
IWB24454	a	a	b	b	b	b	b	b	a	b	b	b	b	b	b	b	b	b	b	a	a	a	b	b	b	b	b	a	b	a	b	b	b	b	a	b	b	a	b	b	b	b	b	b	b	b	b	b	b
IWA5392	-	a	b	a	a	b	b	b	b	b	b	b	a	a	a	a	a	a	a	b	b	b	b	b	b	b	a	b	b	b	a	b	b	b	b	b	b	a	b	b	b	b	b	b	b	b	b	b	a
IWB63879	b	b	b	b	b	b	b	b	b	b	b	b	b	b	b	b	b	b	b	a	b	b	b	b	a	b	b	b	b	a	b	b	b	b	b	a	b	b	b	b	b	b	a	b	b	b	b	a	b
IWB66390	b	a	a	a	a	a	a	a	a	a	a	a	a	a	a	a	a	a	a	a	a	a	a	a	a	a	a	a	a	a	a	a	a	a	a	a	-	a	a	a	a	a	a	a	a	a	a	a	a
IWB62175	b	b	b	a	a	b	b	a	b	a	a	a	b	a	b	a	a	a	a	a	b	b	b	a	b	b	a	b	a	b	b	b	b	b	b	a	a	b	a	b	b	b	a	b	b	b	b	a	a
IWB8330	a	a	a	b	b	b	b	a	a	b	a	b	b	b	a	b	b	b	b	a	a	a	a	b	a	b	a	a	a	b	a	b	b	b	a	a	a	a	a	a	a	a	b	a	a	a	a	b	b
IWB17205	b	a	a	a	a	b	b	a	a	b	a	b	a	b	a	a	b	b	b	a	a	a	a	a	a	b	a	a	a	b	a	b	b	b	a	a	a	a	a	a	a	a	a	a	a	a	a	a	a
IWB27825	b	a	b	b	b	b	b	b	b	b	b	b	b	b	b	b	b	b	b	b	b	b	b	a	a	b	b	b	b	a	b	b	b	b	b	b	b	b	b	b	b	b	b	b	b	b	b	b	b
IWB7112	a	b	a	b	b	b	b	a	b	a	b	a	b	b	b	b	b	b	b	a	b	b	b	a	b	a	a	b	b	b	b	b	b	b	a	b	b	b	b	b	b	a	b	b	b	b	b	b	b
IWB72278	a	a	b	a	a	a	a	a	a	a	a	b	a	b	b	a	a	a	a	b	b	a	b	b	a	b	b	b	a	a	b	b	b	b	a	b	b	a	a	b	b	b	b	b	b	b	a	b	b
IWB4581	b	a	b	a	a	a	a	a	a	b	b	a	a	a	a	a	a	a	a	a	a	b	a	a	b	a	b	b	a	a	a	b	b	b	b	a	a	b	a	a	b	b	a	b	a	a	b	a	b
IWB29747	a	b	a	a	b	b	b	a	a	b	b	a	a	a	a	a	a	a	a	a	a	a	a	a	a	a	a	a	a	a	a	a	a	a	b	a	b	b	a	a	a	a	a	b	a	a	a	a	a
IWA1879	b	b	b	b	a	b	b	a	b	b	b	a	a	a	a	a	b	b	b	a	a	a	a	a	a	a	b	a	a	b	a	a	a	a	a	a	a	a	a	a	a	a	b	a	a	a	a	b	a
IWB50017	b	b	a	b	b	b	b	b	b	b	a	b	b	b	b	b	b	b	b	b	b	a	a	a	b	b	a	b	b	b	b	b	b	b	a	a	a	b	b	b	b	b	b	b	b	b	b	b	a
IWB12478	b	a	b	b	b	b	b	b	a	b	b	b	b	b	b	b	b	b	b	b	b	a	b	b	b	b	b	b	b	b	b	b	b	b	a	a	b	b	b	b	b	b	b	b	b	b	b	a	a
IWB6077	b	a	a	a	b	b	b	a	a	a	a	b	b	b	b	a	b	b	b	a	b	a	a	a	b	a	b	b	b	b	b	b	b	b	a	a	b	b	b	b	b	b	b	b	b	b	b	a	b
IWB70678	a	a	a	a	a	a	a	a	a	a	a	a	a	a	a	a	a	a	a	a	a	a	a	a	a	a	a	b	a	a	a	a	b	b	a	a	a	a	a	a	a	a	a	b	b	b	a	a	a
IWB38609	b	a	a	a	a	a	a	b	b	a	a	a	a	a	b	a	a	a	a	a	a	a	a	a	a	a	b	a	b	a	a	b	b	b	a	b	a	a	a	a	a	a	a	a	a	a	a	b	b
IWB49118	b	a	b	a	a	a	a	a	a	a	a	b	a	b	b	a	a	a	a	b	a	a	a	a	a	a	a	b	a	a	a	a	b	b	a	a	a	b	b	b	b	b	a	b	b	b	b	a	b
IWB35608	a	a	b	b	b	b	b	a	b	b	b	b	a	b	b	b	b	b	b	a	b	b	b	a	a	a	a	a	a	a	a	b	b	b	a	b	b	a	b	b	b	b	a	b	a	b	a	b	b
IWA2492	b	b	a	a	a	a	a	b	b	a	a	a	a	a	b	a	a	a	a	b	b	a	a	b	b	a	b	b	b	a	b	a	a	a	b	a	a	b	b	b	b	b	b	b	b	b	b	a	a
IWB9786	a	a	b	b	b	b	b	a	a	a	b	b	a	b	a	b	b	b	b	b	a	b	a	a	b	a	b	b	b	a	a	b	b	b	a	b	b	b	a	b	a	a	a	a	a	a	a	b	b
IWB49639	b	b	a	a	a	a	a	b	a	a	a	a	b	a	a	a	a	a	a	b	a	a	b	b	b	b	b	b	b	b	b	a	b	b	b	a	a	a	a	a	a	a	b	a	a	a	a	a	b
IWB968	b	a	a	a	a	a	a	b	a	a	a	a	a	a	a	a	a	a	a	a	b	a	a	b	b	b	b	a	b	a	b	a	a	a	a	a	a	b	b	b	b	b	b	b	b	b	b	a	a
IWA5387	a	a	b	b	b	b	b	b	a	a	a	b	a	b	b	b	b	b	b	a	a	a	a	a	b	b	a	a	a	a	a	a	a	a	a	a	a	a	a	a	a	a	a	a	a	a	a	a	a
IWA4841	b	b	b	b	b	a	a	b	b	b	b	b	b	a	b	b	b	b	b	b	b	b	b	b	b	b	b	b	b	b	b	b	b	b	b	b	b	b	b	b	b	b	b	b	b	b	b	b	b
IWB47989	a	a	a	a	b	a	a	a	a	a	a	b	b	a	b	b	a	a	a	a	b	b	b	a	b	b	a	b	b	a	b	b	b	b	b	b	b	b	b	b	b	b	a	b	b	b	b	a	a
IWB27279	b	b	a	a	a	a	a	b	b	a	a	b	b	b	a	b	b	b	b	a	b	b	b	b	b	b	b	a	a	a	b	b	b	b	b	a	a	b	b	b	b	b	a	b	b	a	b	a	a
IWB25922	a	a	b	a	a	b	b	b	a	b	a	a	a	a	b	a	a	a	a	b	a	b	a	a	a	a	a	b	b	b	a	a	a	a	b	b	b	a	a	a	a	a	b	a	a	b	a	b	a
IWB38582	a	b	b	b	b	b	b	b	b	b	b	b	b	b	b	b	b	b	b	b	b	b	b	a	b	b	a	b	b	b	b	a	a	a	b	b	a	b	b	b	b	b	b	b	b	b	b	b	b
IWA4340	b	a	b	a	a	a	a	a	b	a	a	b	b	b	b	a	a	a	a	a	a	b	b	b	b	b	b	a	b	b	a	b	b	b	a	a	b	a	b	a	b	a	a	a	a	a	b	b	a
IWB25872	a	a	b	b	a	b	b	b	b	b	b	b	b	b	a	b	a	a	a	b	b	b	a	b	b	b	b	b	b	b	a	b	b	b	b	b	b	b	b	b	b	b	a	b	b	b	b	b	b
IWB52364	a	a	a	a	a	a	a	b	a	a	a	a	a	a	a	a	a	a	a	a	a	a	a	a	a	a	a	a	a	a	a	a	a	a	a	a	a	a	a	a	a	a	a	a	a	a	a	a	a
IWB42954	a	a	b	a	b	a	a	a	a	b	b	a	a	a	b	a	b	b	a	a	a	b	b	a	a	a	a	a	b	a	a	b	a	a	b	a	b	b	a	a	a	a	b	a	a	a	a	a	a
IWB25147	b	b	b	b	b	b	b	b	b	b	b	b	b	b	b	b	b	b	b	a	b	b	b	b	b	b	b	a	a	a	b	b	b	b	a	b	b	a	b	b	b	b	b	b	b	b	b	b	b
IWB47162	a	a	a	a	a	a	a	a	a	a	a	a	a	a	a	a	a	a	a	b	b	a	a	a	a	a	a	b	a	b	a	a	a	a	a	b	b	a	a	a	a	b	a	b	a	a	b	a	a
IWB57527	a	a	a	a	a	a	a	a	a	a	a	a	a	a	a	b	a	a	a	a	a	a	a	a	a	a	a	a	a	a	a	b	b	b	a	a	a	a	a	a	a	a	a	a	a	a	a	a	a
IWA3074	b	b	b	b	b	b	b	a	a	b	a	b	b	b	b	b	b	b	b	b	b	b	b	b	b	b	b	b	b	b	b	b	b	b	a	b	b	a	b	b	b	b	b	b	b	b	b	b	b
IWA7080	b	b	b	a	a	a	a	a	a	a	a	a	a	a	a	a	b	b	a	a	b	a	a	a	a	b	b	a	b	a	a	a	a	a	a	b	a	a	b	a	a	a	a	a	a	a	a	a	a
IWB38110	b	a	b	b	b	b	b	b	b	a	a	b	a	a	a	b	b	b	b	b	b	b	a	a	a	a	a	b	a	b	a	b	a	a	b	a	b	b	b	b	b	b	b	b	b	b	b	a	a
IWA5897	a	b	a	b	b	b	b	b	b	a	a	b	a	a	a	b	a	a	b	b	a	b	a	a	a	a	a	b	a	b	a	b	a	a	b	a	b	b	a	b	b	b	b	b	b	b	b	a	a
IWB9582	b	a	b	b	a	b	b	b	b	b	b	a	a	b	b	b	b	b	b	b	b	a	a	a	b	b	a	b	b	a	a	b	b	b	b	b	a	b	b	b	b	b	b	b	b	b	b	b	a
IWA3981	a	b	a	a	a	a	a	a	a	a	a	a	a	a	a	a	a	a	a	a	a	a	a	a	b	a	a	a	a	a	a	a	a	a	a	a	a	a	a	a	a	a	a	a	a	a	a	a	a
IWB12343	b	a	a	a	b	b	b	a	a	b	b	a	b	b	a	a	b	b	b	a	b	b	a	a	a	a	b	b	a	b	b	b	a	a	a	a	a	a	b	b	b	b	a	b	b	b	b	a	a
IWB8266	a	a	b	a	a	a	a	b	b	a	a	b	b	b	a	a	a	a	a	a	b	a	b	b	b	a	a	b	a	a	a	a	a	a	a	b	a	b	b	a	b	a	a	a	a	a	b	b	b
IWB52109	b	a	b	b	b	b	b	a	a	b	b	b	b	b	b	b	b	b	b	b	b	b	b	a	a	a	b	b	b	b	b	b	b	b	a	a	a	a	b	b	b	b	a	b	b	b	b	b	a
IWB3498	b	a	b	b	b	a	a	a	a	b	a	a	b	b	b	b	b	b	b	b	b	b	b	a	a	b	b	b	b	b	b	b	b	b	a	b	a	b	b	b	b	b	b	b	b	b	b	b	b
IWA4734	b	a	b	b	b	b	b	b	b	b	b	b	a	b	b	b	b	b	b	a	a	b	b	b	b	a	a	a	b	b	a	b	b	b	a	a	a	b	b	a	a	a	b	a	a	b	b	b	a
IWB36274	b	b	a	a	a	a	a	a	a	a	a	b	a	b	a	a	a	a	a	b	b	a	a	a	a	b	a	b	b	a	a	a	a	a	b	b	b	a	b	b	b	a	b	b	a	a	a	b	b
IWB23028	a	b	b	a	b	a	a	a	b	a	a	a	a	a	b	b	a	a	a	b	b	b	a	b	b	b	b	b	b	a	a	b	a	a	b	b	b	b	b	a	a	a	b	b	b	b	b	b	a
IWA5726	b	a	b	a	a	a	a	a	b	a	a	b	a	a	b	b	a	a	a	a	a	b	a	a	a	a	a	a	a	a	b	b	b	b	a	a	a	a	a	a	a	a	b	a	a	a	a	b	a
IWA2101	a	a	b	a	a	a	a	b	b	a	a	b	a	a	b	b	a	a	b	a	a	a	a	a	a	a	a	a	a	a	a	a	a	a	a	a	a	a	a	a	a	a	a	a	a	a	a	a	a
IWB46287	a	b	a	a	a	b	b	b	b	b	b	b	a	a	a	b	a	a	a	a	a	a	a	b	b	a	a	b	a	a	a	a	a	a	b	b	b	a	a	a	a	a	a	a	a	a	a	a	a
IWA4051	b	a	a	b	a	a	a	a	b	a	a	a	b	a	b	a	a	a	a	b	a	b	b	a	a	b	a	b	a	a	b	a	a	a	a	b	a	b	a	b	b	a	b	a	b	b	a	b	a
IWB29746	b	b	b	a	b	a	b	b	b	b	b	b	b	b	b	b	a	a	a	a	a	a	b	a	b	b	b	a	b	b	b	b	b	b	b	b	b	b	a	b	b	a	b	a	a	a	a	b	b
IWB10092	b	b	b	a	a	b	b	a	a	b	b	a	a	a	b	a	a	a	a	a	a	b	a	a	a	a	a	a	a	a	b	b	b	b	-	a	a	b	a	b	a	a	b	b	b	b	a	b	a
IWB47861	a	a	b	b	a	b	b	b	a	b	b	b	a	a	b	b	a	a	a	b	b	a	a	a	b	b	b	b	b	a	b	b	b	b	a	b	b	a	b	b	b	b	b	b	b	b	b	b	b
IWA6682	b	a	a	b	a	a	a	b	a	a	a	a	a	a	a	b	b	b	b	a	a	a	b	a	a	a	a	b	a	b	a	b	b	b	a	a	a	b	b	b	b	b	a	b	b	a	b	a	b
IWA7565	b	b	a	b	b	b	b	a	a	b	b	a	a	b	b	b	b	b	b	b	a	b	a	a	a	b	b	a	b	b	b	b	b	b	b	a	b	a	a	b	a	b	b	a	a	b	a	a	a
IWA1686	b	b	b	a	b	a	a	b	b	b	a	b	b	b	a	b	b	b	b	b	b	b	b	b	b	b	b	b	a	a	b	a	a	a	b	b	b	b	b	b	b	b	b	b	b	b	b	b	a
IWB17202	a	a	a	a	a	a	a	a	a	a	a	a	a	a	a	a	a	a	a	a	a	a	a	a	a	a	a	a	a	a	a	a	a	a	a	a	a	a	a	a	a	a	a	a	a	a	a	a	a
IWB34927	a	a	a	a	a	a	a	b	a	a	a	a	a	a	a	a	a	a	a	a	a	b	a	a	a	a	a	a	a	a	b	a	a	a	b	a	a	a	a	a	a	b	a	b	a	a	a	a	a
IWB541	b	b	b	a	a	a	a	a	b	b	b	a	b	a	b	a	a	a	a	a	b	b	a	a	a	b	a	b	a	a	b	b	b	b	b	b	b	b	b	b	b	b	b	b	b	a	b	b	b
IWB39570	b	b	b	a	a	a	a	b	b	a	a	b	b	b	b	a	b	b	a	a	b	b	b	b	b	a	a	b	b	b	b	a	b	b	b	a	a	b	b	a	a	a	b	a	a	b	b	a	b
IWB25845	b	b	b	b	b	b	b	b	b	b	b	b	b	b	b	b	b	b	b	b	b	b	b	b	b	b	b	b	b	b	b	b	b	b	b	b	b	b	b	b	b	b	b	b	b	b	b	b	a
IWB55565	b	b	b	a	a	a	a	b	b	a	b	b	b	b	b	b	a	a	a	b	b	b	b	b	a	b	a	b	b	a	b	b	b	b	b	b	b	b	b	b	b	b	a	b	b	b	b	b	a
IWB11342	a	a	a	a	a	a	a	a	a	a	a	a	a	a	a	a	a	a	a	a	a	a	a	b	a	a	a	a	a	a	b	a	a	a	a	a	a	a	a	a	a	a	a	a	a	a	a	a	a
IWB63558	b	a	b	b	b	b	b	b	b	b	a	b	a	b	b	b	b	b	b	b	b	b	b	b	b	b	b	b	b	b	b	b	b	b	a	b	a	b	b	b	b	b	a	b	b	a	b	b	a
IWB37548	a	b	a	b	a	b	b	b	a	b	b	b	a	a	a	b	a	a	a	a	a	a	a	b	b	b	b	a	a	a	a	a	a	a	b	a	b	a	a	a	a	a	a	a	a	a	a	a	a
IWB39469	b	a	a	b	b	a	a	b	a	b	a	a	a	a	b	b	b	b	b	a	a	a	a	b	a	b	b	a	a	b	a	a	a	a	b	a	b	a	a	a	a	b	a	a	a	a	a	b	a
IWB65358	a	a	b	a	a	b	b	a	a	a	a	b	b	b	a	a	b	b	a	a	b	a	b	b	b	b	b	a	a	b	b	b	b	b	a	b	b	a	b	b	b	a	b	a	a	b	b	b	a
IWA2099	b	b	b	b	b	b	b	b	b	a	b	b	b	b	b	b	b	b	b	b	b	b	b	b	b	b	b	b	b	b	b	b	b	b	b	b	b	b	a	a	a	b	b	b	a	a	b	b	b
IWA8087	a	a	a	b	b	a	a	b	a	a	a	a	b	a	a	b	a	a	b	a	a	a	b	b	a	a	a	a	a	a	b	a	a	a	a	a	a	a	a	a	a	a	a	a	a	a	a	a	a
IWB49013	b	a	a	b	b	b	b	a	a	a	a	a	a	b	a	b	b	b	b	a	a	a	b	b	a	b	a	a	b	a	a	b	b	b	a	a	a	a	a	a	a	a	a	a	a	b	a	b	a
IWB33567	b	b	b	b	b	b	b	b	a	b	b	a	b	b	b	b	b	b	b	b	a	a	b	b	b	b	b	b	b	b	b	a	a	a	b	b	b	b	a	a	a	a	b	a	b	b	a	b	b
IWB74471	b	b	b	b	b	b	b	b	b	b	b	a	b	b	b	b	b	b	b	b	a	a	b	b	b	b	b	b	b	b	b	b	b	b	b	b	b	b	a	a	a	b	b	b	a	a	a	b	b
IWB73469	-	b	b	b	b	b	b	b	b	b	b	b	b	b	b	b	b	b	b	b	b	b	b	b	a	b	b	b	b	b	a	b	b	b	b	b	b	b	b	b	-	b	b	b	b	b	b	b	b
IWB8079	b	a	a	a	a	a	a	a	b	a	a	b	b	a	a	a	a	a	a	a	a	b	a	a	a	a	b	a	a	a	a	b	b	b	a	a	a	a	a	a	a	a	a	a	a	a	a	a	a
IWB44471	a	b	b	a	a	a	a	b	b	b	b	b	b	a	b	a	a	a	a	b	b	b	a	a	b	a	b	b	a	b	b	a	a	a	b	b	b	b	b	b	b	b	b	b	b	a	b	a	b
IWB33838	b	b	b	b	b	b	b	a	a	b	b	a	a	b	a	b	b	b	b	b	b	b	b	b	a	b	b	b	b	b	b	a	a	a	a	b	a	a	b	b	b	b	a	b	b	b	b	b	b
IWB12289	b	a	b	a	a	a	a	a	a	a	a	a	b	a	a	a	a	a	a	a	a	a	a	b	a	a	a	a	a	a	a	a	a	a	a	a	a	a	a	a	a	a	b	a	a	a	a	a	a
IWB51313	a	b	a	a	a	b	b	a	a	a	b	a	a	b	a	a	b	b	a	a	a	a	a	a	b	b	a	a	b	b	a	a	a	a	b	a	a	a	a	a	a	a	a	a	a	a	a	a	a
IWA8060	b	b	b	b	b	b	b	b	b	a	a	b	b	b	b	b	b	b	b	a	b	b	a	b	b	a	a	a	b	b	b	b	b	b	b	a	a	b	a	a	a	a	a	a	a	a	a	b	a
IWA7954	a	a	a	b	b	a	a	b	b	a	a	a	b	a	a	b	a	a	b	b	b	a	b	b	a	a	a	b	a	a	b	a	a	a	a	a	b	a	b	b	b	b	a	b	b	b	b	b	b
IWB24380	b	b	b	b	b	b	b	a	b	b	b	b	a	b	b	b	b	b	b	b	a	b	a	b	b	b	a	a	b	b	b	a	b	b	a	a	a	a	b	b	b	a	b	a	b	b	a	b	b
IWB59702	b	a	a	a	a	a	a	b	b	a	a	b	b	b	a	a	a	a	a	a	b	b	a	a	a	a	a	b	a	a	a	b	b	b	a	a	a	a	b	b	b	b	a	b	b	b	b	a	a
IWB36957	b	a	b	a	a	a	a	a	a	b	b	a	b	a	b	a	a	a	a	b	b	b	b	b	b	a	b	b	a	b	b	b	b	b	a	a	a	b	b	b	b	b	b	b	b	b	b	b	b
IWB23104	b	b	b	b	b	b	b	a	b	a	a	b	b	b	b	b	b	b	b	b	b	b	b	a	b	a	a	b	b	b	b	b	b	b	a	a	b	b	b	b	b	b	b	b	b	a	b	b	b
IWA7887	b	b	b	a	a	b	b	a	b	b	b	b	a	b	b	a	b	b	a	b	b	b	a	a	b	b	b	b	b	b	a	b	b	b	b	b	b	b	b	b	b	b	b	b	b	b	b	b	b
IWA7847	b	a	a	a	a	a	a	b	b	a	a	a	b	b	a	a	a	a	a	a	b	b	b	a	a	a	a	a	a	a	a	b	b	b	a	a	b	a	b	b	b	a	a	b	b	b	b	a	a
IWB65773	a	b	b	b	b	b	b	a	a	b	b	b	a	a	b	b	b	b	b	b	a	a	a	b	b	b	b	b	b	b	b	a	a	a	b	b	a	b	a	a	a	b	b	a	a	a	a	b	b
IWA214	a	a	a	a	b	a	a	a	a	a	a	b	a	a	a	a	a	a	b	b	b	a	b	a	a	a	a	b	a	a	b	a	a	a	a	a	b	b	b	b	b	b	a	b	b	a	b	a	a
IWA8191	b	a	b	a	a	a	a	b	b	a	b	a	a	b	b	a	a	a	a	b	b	a	a	a	b	a	a	b	b	a	b	b	b	b	a	a	a	a	b	b	b	b	a	b	b	a	b	a	b
IWB22663	b	a	b	a	a	a	a	b	b	a	b	a	b	b	b	a	a	a	a	b	b	a	a	a	b	a	a	b	a	a	b	b	b	b	a	a	a	a	b	b	b	b	a	b	b	a	b	a	a
IWB71603	a	a	a	a	a	a	a	b	a	a	b	a	a	a	a	a	a	a	a	a	a	a	a	a	a	a	a	b	a	a	b	b	b	b	a	a	a	a	a	b	b	a	a	a	a	a	a	a	a
IWA3526	b	b	b	b	b	b	b	a	b	b	b	b	a	b	b	b	b	b	b	b	b	a	b	b	b	b	b	b	b	b	b	b	b	b	b	b	b	b	b	b	b	b	b	b	a	b	b	b	b
IWB22095	b	b	b	b	b	b	b	b	b	b	a	b	b	b	b	b	a	a	b	b	a	b	b	b	b	b	b	b	b	b	b	b	b	b	b	b	b	a	b	b	b	b	b	b	b	b	a	b	b
IWB63290	b	a	a	a	a	a	a	a	a	a	a	a	a	b	a	a	a	a	a	a	a	a	b	a	a	a	a	a	a	a	a	b	a	a	a	a	a	a	a	a	a	a	a	a	a	a	a	a	a
IWB9849	a	b	a	a	a	a	a	a	a	a	a	a	a	a	a	a	a	a	a	a	a	a	b	b	a	a	a	a	a	a	a	a	a	a	a	a	b	a	a	a	a	a	a	a	a	a	a	a	a
IWB66246	b	b	a	b	b	b	b	b	b	b	b	b	a	b	b	b	b	b	b	b	b	b	b	a	b	b	b	b	b	a	b	b	b	b	b	b	b	b	b	b	b	b	b	b	b	b	b	b	b
IWB45294	b	b	b	b	b	b	b	b	b	b	b	b	b	b	b	b	b	b	b	b	b	b	b	b	b	b	b	b	b	b	b	b	b	b	b	b	b	b	b	b	b	b	b	b	b	b	b	b	b
IWA7397	a	b	a	a	b	a	a	a	a	b	b	a	a	a	a	a	a	a	a	a	a	a	b	a	a	a	a	a	b	a	b	a	b	b	b	a	a	a	a	a	a	a	a	a	a	a	a	a	b
IWA8177	b	a	a	b	b	b	b	b	b	a	a	b	b	a	b	b	b	b	b	a	b	b	b	b	b	b	b	b	a	a	a	b	a	a	b	a	a	a	a	b	b	b	b	b	b	b	b	b	a
IWB21952	b	b	b	b	b	b	b	b	b	b	b	a	a	a	b	b	b	b	b	b	b	a	b	b	b	b	a	b	b	b	b	b	b	b	b	b	b	b	b	b	b	b	b	b	b	b	b	b	a
IWB43702	b	b	b	a	b	b	b	b	b	a	a	b	b	a	a	b	b	b	b	a	b	b	b	a	b	a	a	a	b	b	b	a	a	a	b	a	a	b	b	b	b	b	b	b	b	a	a	a	b
IWB37585	b	a	b	a	a	a	a	a	a	a	a	a	a	b	b	a	a	a	a	b	a	b	a	a	a	b	a	b	b	b	a	b	b	b	a	b	b	a	b	b	b	a	a	b	b	a	a	b	a
IWB21994	b	b	a	a	a	b	b	a	a	b	b	a	b	b	a	a	a	a	a	b	b	a	a	b	b	b	b	a	b	a	b	b	b	b	a	a	b	a	a	a	a	b	a	a	a	a	b	a	b
IWB35787	a	a	a	a	a	a	a	a	a	a	a	a	a	a	a	a	a	a	a	a	b	b	a	a	a	a	a	a	a	a	a	a	a	a	b	a	a	b	b	b	b	a	a	a	b	a	a	a	a
IWB55919	a	a	a	b	b	a	a	a	a	a	a	b	a	b	a	b	a	a	b	a	a	a	b	a	b	a	a	a	b	a	a	b	a	a	a	a	a	a	a	a	a	a	a	a	a	a	a	-	a
IWB42459	a	b	a	a	a	a	a	b	a	a	b	a	a	a	a	a	a	a	a	a	a	a	a	a	b	a	a	a	a	b	a	a	a	a	b	a	a	a	a	a	a	a	a	a	a	a	a	a	a
IWB50233	a	a	a	a	a	a	a	a	b	a	a	a	b	a	a	a	a	a	a	b	a	a	a	b	a	b	b	b	a	a	a	a	a	a	a	a	a	a	a	a	a	a	a	a	a	a	a	b	a
IWA834	a	a	a	a	a	b	b	a	a	a	a	a	a	a	a	a	a	a	a	b	a	b	a	a	a	a	a	a	a	b	b	b	b	b	a	b	a	a	a	a	a	a	b	a	a	b	a	b	a
IWB44832	b	a	a	a	a	a	a	a	a	a	a	a	b	a	a	a	a	a	a	a	a	a	a	a	b	b	a	b	a	b	a	a	a	a	a	a	a	b	a	b	b	b	a	b	b	b	b	a	a
IWB35606	b	b	a	b	b	b	b	a	a	b	b	b	a	a	a	b	b	b	b	b	b	a	a	a	a	b	b	b	a	b	a	b	b	b	b	a	a	b	b	b	b	b	a	b	b	b	b	a	a
IWB30564	b	a	a	a	a	a	a	a	a	a	a	b	a	a	a	a	a	a	a	a	a	a	a	a	a	b	a	a	a	a	a	b	b	b	a	a	a	a	b	a	a	a	a	b	a	a	b	a	a
IWB6290	b	b	b	a	b	b	b	b	b	b	b	b	b	a	b	b	b	b	a	a	b	a	b	b	b	b	b	b	b	a	a	b	b	b	b	b	b	b	b	a	b	b	b	b	b	a	a	b	a
IWB27761	b	a	a	b	a	a	a	a	b	b	b	a	a	b	b	a	a	a	a	b	a	a	a	b	b	b	b	b	a	b	a	b	b	b	b	b	b	a	a	a	a	a	a	a	a	b	b	b	a
IWB27696	a	b	a	b	b	b	b	b	a	b	b	b	b	a	a	b	b	b	b	a	b	b	b	b	b	b	b	a	b	b	b	a	b	b	b	b	b	b	a	b	b	b	b	b	b	b	b	b	b
IWB29365	a	a	b	a	a	a	a	a	a	a	a	a	a	a	b	a	a	a	a	a	a	a	b	a	a	b	a	a	a	a	a	a	a	a	a	a	a	a	a	a	a	a	b	a	a	a	a	a	a
IWA7200	b	b	b	b	b	b	b	b	b	b	a	b	b	b	a	b	b	b	b	b	b	a	b	b	b	b	b	b	b	b	b	b	b	b	a	a	a	a	b	b	b	b	a	b	b	b	b	b	b
IWB23319	b	b	b	b	b	b	b	b	b	b	b	b	b	a	b	b	b	b	b	b	b	b	b	b	b	b	b	b	b	b	b	b	b	b	b	b	b	b	b	b	b	b	a	b	b	a	b	b	b
IWA418	a	b	a	a	a	a	a	a	a	b	b	a	a	a	a	a	a	a	a	a	a	a	b	a	a	a	a	a	a	a	a	b	b	b	a	a	a	a	b	b	a	b	a	b	b	a	a	a	a
IWB6064	a	a	a	a	a	b	b	b	b	b	b	b	b	a	a	a	a	a	a	b	b	b	b	b	b	b	a	b	a	b	b	b	b	b	b	a	b	b	b	b	b	b	a	b	b	b	b	a	a
IWB27037	a	b	a	a	a	b	a	b	a	b	a	a	a	b	a	b	a	a	b	a	a	b	b	b	a	b	a	a	b	a	b	b	a	a	a	a	b	a	a	a	b	b	a	b	b	b	a	a	a
IWB23042	a	b	b	b	a	b	b	b	b	b	b	b	b	b	b	b	a	a	b	b	b	b	b	b	b	b	b	b	b	a	b	b	b	b	b	b	b	b	a	a	b	b	b	b	a	b	a	b	a
IWB53745	a	b	a	a	a	b	b	a	a	a	a	a	b	a	a	a	a	a	a	a	a	b	a	b	b	a	a	a	a	b	b	a	a	a	a	a	a	a	a	a	a	a	a	a	a	b	a	a	a
IWB42465	b	b	a	b	b	a	a	b	a	b	a	b	a	b	a	b	b	b	b	b	a	b	b	b	b	b	b	b	b	b	b	b	b	b	b	a	b	b	b	a	a	b	a	a	a	a	a	b	b
IWA490	a	b	a	a	a	a	a	a	b	a	b	a	a	a	a	a	a	a	a	a	a	b	a	a	a	a	a	a	a	b	a	a	a	a	b	a	a	b	a	a	a	a	a	a	a	a	a	a	a
IWA2703	b	a	a	a	a	a	a	b	b	b	b	b	a	b	b	a	a	a	a	a	b	b	b	a	b	b	b	b	a	b	b	b	b	b	b	b	b	a	b	b	b	b	b	b	b	b	b	b	b
IWB24480	b	b	a	a	a	a	a	a	a	a	a	b	a	a	b	a	a	a	a	a	b	a	a	b	a	b	a	b	a	b	b	b	b	b	b	b	a	b	b	b	b	b	a	b	b	b	b	a	a
IWB11437	b	a	a	b	b	b	b	b	b	a	b	a	a	b	a	b	b	b	b	a	b	b	a	a	b	a	b	b	b	b	a	a	a	a	b	a	a	a	a	b	b	b	b	b	a	b	a	a	a
IWB47546	a	a	a	b	b	a	a	a	b	b	b	a	a	a	a	b	b	b	b	b	a	a	a	a	b	a	b	a	b	-	a	a	a	a	b	a	b	a	a	a	a	a	a	a	a	a	a	b	a
IWA2784	b	b	a	a	a	b	b	a	b	b	b	b	b	a	b	a	a	a	a	b	b	b	a	a	a	b	a	b	b	b	b	b	b	b	b	a	a	b	b	b	b	b	a	b	b	b	b	b	a
IWB1415	a	b	a	a	a	a	a	a	a	b	a	b	a	a	a	a	a	a	a	b	b	b	a	a	a	b	b	a	a	a	a	b	a	a	b	a	b	b	b	b	b	b	a	b	b	b	b	b	b
IWB71872	a	b	a	b	b	b	b	b	b	b	b	b	b	b	b	b	b	b	b	b	b	b	a	b	b	b	b	b	b	b	b	a	a	a	b	b	b	b	b	b	b	b	b	b	b	b	b	a	a
IWB36034	a	b	b	a	a	a	a	a	a	a	a	a	b	b	b	a	a	a	b	b	b	b	b	b	b	b	b	b	b	b	b	a	a	a	a	b	b	b	b	b	b	b	b	b	b	b	b	b	b
IWA4797	b	a	b	a	b	b	b	b	a	b	a	a	a	b	b	b	b	b	b	b	b	a	a	a	a	b	b	b	b	b	b	b	b	b	a	b	a	a	b	b	b	b	b	b	b	b	b	b	b
IWB40316	b	b	b	b	b	b	b	b	b	b	b	b	a	b	b	b	b	b	b	a	b	b	b	b	b	b	b	a	b	b	b	b	b	b	b	a	a	b	b	b	b	a	b	b	b	b	a	b	b
IWB7186	a	a	b	b	b	b	b	b	b	b	b	b	b	b	b	b	b	b	b	b	b	b	b	a	a	b	b	b	b	a	b	b	b	b	b	b	b	a	b	a	a	b	a	a	a	a	b	b	b
IWA7504	a	a	b	a	a	b	b	a	a	a	a	b	b	b	b	a	a	a	a	b	b	b	a	a	a	a	a	a	b	a	b	b	b	b	a	b	b	a	b	a	a	b	a	a	a	a	b	b	a
IWB56410	a	b	b	b	b	b	b	a	a	a	a	a	a	a	b	a	b	b	b	a	a	b	a	b	a	b	b	a	a	a	a	a	a	a	b	a	a	b	a	a	a	a	a	a	a	a	a	a	a
IWB21167	a	b	b	a	a	b	b	b	b	b	b	a	b	b	b	a	a	a	a	b	b	b	b	b	b	b	b	b	a	b	b	b	b	b	b	b	b	b	b	b	b	b	b	b	b	b	b	b	b
IWB43083	b	b	b	a	a	b	b	b	a	a	a	b	b	b	b	a	a	a	a	a	b	b	b	b	b	b	a	b	a	b	b	b	b	b	a	b	a	b	b	b	b	a	b	a	b	b	b	a	b
IWB47894	-	b	b	a	a	b	b	a	b	a	a	b	b	b	b	a	a	a	a	b	b	b	b	b	b	b	b	a	b	b	b	b	b	b	b	b	b	a	b	a	a	b	a	a	a	a	b	b	b
IWB42357	b	b	b	b	b	b	b	a	b	b	b	b	a	b	a	b	b	b	b	b	b	b	b	b	a	a	b	b	a	b	b	b	b	b	b	b	a	b	b	b	b	b	b	b	b	b	b	b	a
IWB63712	a	a	a	b	a	a	a	a	a	a	b	b	b	a	a	b	a	a	a	b	b	a	a	b	a	b	b	b	a	a	b	b	a	a	a	a	b	b	b	a	b	b	b	b	b	b	b	b	b
IWB2222	b	a	a	a	a	b	b	a	a	a	a	b	a	b	b	a	a	a	a	a	a	b	a	a	b	a	a	b	b	-	a	a	a	a	a	a	a	a	a	a	b	a	a	a	b	a	b	b	a
IWB36553	b	b	a	b	a	a	a	b	b	b	b	a	b	a	b	a	a	a	a	a	b	a	b	b	b	b	b	b	a	b	b	b	b	b	b	b	b	b	b	a	b	a	b	b	b	b	b	b	b
IWB77	a	a	a	a	a	a	a	a	a	a	a	b	a	a	b	a	a	a	a	a	a	a	a	a	a	b	a	a	a	a	a	a	b	b	b	a	a	a	a	a	a	a	a	a	a	-	a	a	a
IWB42917	a	a	a	b	b	b	b	a	a	a	b	a	a	b	a	b	b	b	b	a	a	b	b	a	a	a	b	a	b	a	a	a	a	a	a	b	a	a	a	a	a	a	a	a	a	a	a	b	a
IWB69597	b	b	a	a	a	a	a	a	a	b	a	a	a	b	a	a	a	a	a	b	b	b	b	b	b	b	b	a	a	b	a	a	a	a	b	a	a	a	a	a	a	b	a	a	a	a	b	b	a
IWB60722	a	b	a	b	a	a	a	b	b	b	b	a	b	a	a	b	a	a	a	b	b	b	a	a	a	a	a	a	a	b	b	a	a	a	b	b	b	b	b	b	b	b	a	b	b	b	b	a	b
IWB42109	a	a	b	a	a	a	a	a	a	b	a	a	a	a	b	a	a	a	a	a	a	a	b	b	b	a	a	a	b	b	a	a	a	a	a	a	a	a	a	a	a	a	a	a	a	a	b	a	a
IWB62674	-	a	b	b	b	b	b	b	b	b	b	b	b	b	b	b	b	b	b	a	b	b	b	b	b	b	a	b	b	b	b	b	b	b	b	b	a	b	b	b	b	b	b	a	b	b	b	a	a
IWB39439	b	b	b	b	b	b	b	b	a	b	b	b	b	b	b	b	b	b	b	b	b	b	b	b	b	a	b	b	b	b	b	b	b	b	a	b	b	b	b	b	b	b	b	b	b	b	b	b	b
IWB40676	b	b	b	a	a	b	b	b	b	a	b	-	b	a	b	a	a	a	a	a	b	a	b	b	b	b	a	b	b	b	b	b	b	b	a	b	b	b	a	b	a	a	b	a	a	a	b	b	b
IWB65748	a	a	b	a	a	a	a	a	a	a	a	a	a	a	a	a	a	a	a	a	a	a	a	a	a	a	a	a	a	b	a	a	a	a	a	b	a	a	a	a	a	a	b	a	a	a	a	a	a
IWA2317	b	b	b	a	a	b	b	a	a	b	b	b	b	b	b	a	a	a	b	b	b	a	a	a	b	b	b	b	b	-	b	b	b	b	b	b	b	b	b	b	b	b	b	b	b	b	b	b	b
IWB73615	a	a	b	a	a	a	a	a	a	a	b	b	a	a	a	a	a	a	a	a	a	a	a	b	b	a	b	a	a	a	a	b	a	a	a	a	a	a	a	a	a	a	a	a	a	a	a	a	b
IWB43011	b	a	b	a	b	b	b	a	a	a	a	b	b	b	b	a	b	b	b	a	a	a	b	b	b	b	b	b	b	b	a	b	b	b	a	a	a	a	a	a	a	a	b	a	a	a	a	b	a
IWB2986	a	a	b	b	b	b	b	b	a	b	b	b	a	b	b	b	b	b	b	b	b	b	a	a	b	a	b	b	b	a	a	b	b	b	b	a	a	b	b	b	b	b	b	b	b	b	b	b	a
IWB2685	b	a	b	b	b	b	b	b	a	b	b	b	a	b	b	b	b	b	b	b	b	b	a	a	b	a	b	b	b	a	a	b	b	b	b	a	a	b	b	b	b	b	b	b	b	b	b	b	a
IWB34732	-	b	a	b	b	b	b	b	b	b	b	b	b	b	b	b	b	b	b	b	a	b	b	b	b	b	b	b	b	b	a	b	b	b	b	b	b	b	b	a	b	b	a	b	b	b	b	b	b
IWB44277	a	a	a	a	a	a	a	a	b	a	a	a	b	a	a	a	a	a	a	b	b	a	b	a	a	a	a	b	a	b	a	b	b	b	a	b	b	b	b	b	b	a	a	b	b	b	b	a	b
IWB32177	b	a	b	b	b	b	b	b	a	b	b	b	a	b	b	b	b	b	b	b	b	b	a	a	b	a	b	b	b	a	a	b	b	b	b	a	a	b	b	b	b	b	b	b	b	b	b	b	a
IWB8772	b	b	a	b	a	b	b	b	a	b	b	a	b	b	b	b	b	b	a	a	a	b	a	a	b	b	a	b	b	a	a	a	a	a	b	a	b	a	b	b	b	b	b	b	b	b	b	a	a
IWA6474	b	a	a	b	b	b	b	b	a	b	b	a	a	a	a	b	b	b	b	a	a	a	a	a	a	a	b	b	b	b	b	a	-	a	b	a	b	b	b	b	b	a	a	b	b	b	b	b	a
IWB31124	b	a	a	a	a	a	a	a	b	a	a	a	b	a	a	a	a	a	a	a	a	a	b	b	a	a	a	a	a	b	b	a	a	a	a	a	b	a	a	a	a	a	a	a	a	a	a	a	b
IWB26823	a	a	a	a	a	b	b	a	b	b	a	a	a	a	a	a	b	b	a	a	a	a	b	b	b	a	a	b	a	a	a	a	a	a	b	a	b	b	a	a	a	a	a	a	a	a	b	a	b
IWB65565	b	b	a	b	a	b	b	b	b	b	b	a	b	b	b	b	b	b	a	b	a	b	b	a	b	a	a	a	a	b	a	a	a	a	b	b	b	b	b	b	b	b	b	a	b	a	b	b	b
IWB10507	b	b	a	b	a	b	b	b	b	b	b	b	b	b	a	b	b	b	b	a	b	b	b	b	b	b	b	a	b	b	b	a	a	a	b	b	b	b	a	b	a	b	a	a	a	b	a	a	b
IWB44694	b	b	b	b	b	b	b	b	b	b	b	b	b	b	b	b	b	b	b	b	b	b	b	b	b	b	b	b	b	b	b	b	b	b	a	b	b	a	b	b	b	b	b	b	b	b	b	b	b
IWB5274	a	b	b	b	b	b	b	b	b	b	b	b	b	b	b	b	b	b	b	a	a	b	b	b	b	b	b	a	a	a	a	b	b	b	b	a	b	b	a	a	a	a	a	a	a	a	a	a	b
IWA3839	b	b	b	b	b	b	b	a	b	b	b	b	b	a	b	b	b	b	b	b	b	b	b	b	b	b	b	b	b	b	b	b	b	b	b	b	b	b	b	b	b	b	a	b	b	b	b	a	b
IWB15066	a	b	b	a	a	b	b	b	b	b	b	b	b	b	a	a	a	a	a	b	b	b	b	b	b	b	a	b	a	b	a	b	b	b	b	b	b	b	b	b	b	b	a	b	b	b	b	a	a
IWA4789	b	b	b	a	a	a	a	b	b	b	b	b	a	b	b	b	a	a	a	b	b	b	b	b	b	b	b	b	b	b	b	b	b	b	b	a	b	b	b	b	b	b	b	b	b	b	b	b	b
IWB26791	a	b	b	b	b	b	b	b	b	b	b	a	a	b	b	b	b	b	b	b	b	b	a	b	b	b	b	b	b	b	b	b	b	b	b	b	b	b	b	b	b	b	b	b	b	b	b	b	b
IWB2310	a	b	b	b	b	b	b	b	b	b	b	a	b	b	b	b	b	b	b	b	b	b	a	a	b	b	b	b	b	b	b	b	b	b	b	b	b	b	b	b	b	b	b	b	b	b	b	b	b
IWB4070	b	a	a	a	a	a	a	a	b	a	a	a	a	a	a	a	a	a	a	a	b	a	a	a	a	a	a	b	a	a	b	a	a	a	a	a	a	a	b	a	a	b	a	b	a	a	b	a	a
IWB61723	a	b	a	a	a	a	a	a	a	a	a	a	a	a	a	a	a	a	a	a	a	a	a	a	a	a	a	a	a	b	a	a	a	a	a	a	a	a	a	a	a	a	a	a	a	a	a	a	a
IWB36271	a	b	a	a	a	a	a	a	a	a	a	a	a	a	b	a	a	a	a	a	a	a	a	a	a	a	b	a	a	a	a	a	a	a	a	a	a	a	a	a	a	a	b	a	a	a	a	a	a
IWA4118	a	a	a	a	a	a	a	a	a	a	b	a	a	a	a	a	a	a	a	a	a	b	a	a	a	a	a	a	a	a	b	a	a	a	a	b	b	a	a	a	a	a	a	a	a	a	a	a	a
IWB42519	-	a	b	a	a	a	a	a	b	a	b	b	a	a	a	a	a	a	a	a	b	b	b	a	a	a	a	a	a	a	b	b	b	b	a	a	a	a	b	a	a	b	b	b	a	b	a	a	a
IWB49863	b	b	b	b	b	b	b	b	a	b	b	a	b	a	b	b	b	b	b	a	b	b	b	b	b	a	a	b	a	b	a	b	b	b	b	b	a	b	b	b	b	b	b	b	b	b	b	a	b
IWA7736	-	b	b	b	b	b	b	b	b	a	b	a	a	b	b	b	b	b	b	b	b	a	b	b	b	b	a	b	a	a	b	a	b	b	a	a	a	a	b	a	b	b	a	b	b	b	b	b	a
IWB75041	a	b	b	b	a	a	a	a	b	a	a	a	a	b	a	a	a	a	b	b	a	a	a	b	a	a	a	a	a	b	b	a	a	a	b	a	a	b	a	a	a	a	a	a	a	b	a	b	a
IWB59950	b	b	b	b	b	b	b	a	b	b	b	b	a	b	b	b	b	b	b	b	b	b	b	b	b	b	b	b	b	b	b	a	a	a	b	-	b	b	b	b	b	b	b	b	b	b	b	b	b
IWB45657	a	b	a	a	a	a	a	a	a	a	a	a	a	b	a	a	a	a	a	a	a	a	b	b	a	a	a	a	a	a	a	a	a	a	a	a	a	a	a	a	a	a	a	a	a	a	a	a	a
IWB39924	a	a	b	a	a	a	a	a	b	a	a	a	a	a	a	a	a	a	a	a	b	a	a	a	b	a	b	b	a	a	b	a	a	a	a	a	a	a	b	a	a	b	a	b	a	b	a	a	a
IWB61830	a	b	a	a	a	b	b	b	b	b	b	b	b	b	b	a	a	a	b	b	b	b	b	a	b	a	a	b	b	a	b	a	a	a	b	b	b	b	b	b	b	b	b	b	b	b	b	a	b
IWB35998	b	b	b	a	a	a	a	b	b	a	b	a	a	a	b	a	a	a	a	b	b	b	b	a	b	a	b	b	b	b	b	a	a	a	b	b	b	b	b	b	b	b	a	b	b	b	b	a	a
IWB6461	b	b	a	b	b	b	b	b	b	b	b	a	b	a	b	b	b	b	b	b	b	b	b	b	b	a	b	b	b	a	a	a	a	a	b	b	b	a	b	b	b	b	b	b	b	b	b	b	b
IWB22684	b	b	b	a	b	a	a	b	a	a	b	b	a	b	a	a	a	a	b	a	a	a	b	a	b	a	a	a	a	a	a	b	b	b	a	a	a	a	a	a	a	a	a	b	a	b	a	a	a
IWB24452	b	b	b	b	b	b	b	b	b	b	a	b	b	b	b	b	b	b	b	b	b	b	b	b	b	b	b	b	b	b	b	b	b	b	b	b	b	b	b	b	b	b	b	b	b	b	b	b	b
IWB2943	-	b	b	b	a	b	b	a	b	a	a	a	b	a	b	b	b	b	b	b	a	a	a	a	a	b	a	a	a	a	b	b	a	a	b	a	a	b	b	b	b	b	b	b	b	b	b	b	b
IWB35540	b	a	a	b	b	b	b	b	b	b	b	b	b	b	b	b	b	b	b	a	b	b	b	b	a	b	b	b	b	b	b	b	b	b	a	b	b	b	b	b	b	b	b	b	b	b	b	a	b
IWB54547	a	b	a	a	a	b	b	b	a	a	a	a	a	b	a	a	a	a	a	a	a	a	a	b	b	b	a	a	a	a	a	a	a	a	a	a	a	a	a	a	a	a	a	a	a	a	a	a	a
IWB16032	b	a	b	a	a	b	b	b	b	b	b	a	a	a	a	a	a	a	a	a	a	a	a	a	a	a	a	a	a	a	a	b	b	b	a	b	b	a	a	a	a	a	a	a	a	a	a	a	b
IWB8706	b	b	b	b	b	b	b	b	a	a	b	a	a	b	b	b	b	b	b	b	b	a	a	a	a	b	b	b	b	a	b	a	a	a	b	b	a	b	a	a	b	a	a	b	a	a	a	a	a
IWA6302	b	a	b	b	b	b	b	a	b	a	b	a	b	b	b	b	b	b	b	a	b	b	b	b	b	b	a	b	a	a	b	b	b	b	a	a	a	b	b	b	b	b	b	b	b	a	b	b	b
IWB23583	a	a	a	a	b	a	a	b	a	a	a	a	b	a	a	b	b	b	a	a	a	a	a	a	a	a	a	a	a	a	a	a	a	a	a	b	a	a	a	a	a	a	a	a	a	a	a	a	a
IWB38921	a	b	b	b	b	b	b	b	b	b	b	a	a	b	b	b	b	b	b	b	a	a	b	a	b	b	a	b	a	b	b	a	a	a	b	a	b	a	b	b	a	b	a	b	b	a	a	b	a
IWB11270	-	b	a	b	b	a	a	a	b	b	b	b	b	b	b	b	b	b	b	b	a	b	b	b	b	a	b	b	b	b	b	b	b	b	a	b	a	b	a	b	b	b	a	b	b	b	a	b	b
IWB57247	a	b	b	a	a	a	a	a	a	a	a	a	b	a	a	a	b	b	a	a	a	b	b	b	a	a	b	b	b	a	a	a	b	b	b	b	b	b	b	b	b	b	b	b	b	b	b	a	b
IWA4269	b	b	b	b	b	a	a	b	b	a	b	b	b	a	b	b	b	b	b	b	b	b	b	b	b	b	b	b	b	b	b	b	b	b	b	b	b	b	b	b	b	b	b	b	b	b	b	b	b
IWB54978	b	b	b	b	a	b	b	b	b	b	b	b	b	b	b	b	a	a	a	b	b	b	b	b	b	b	b	a	b	b	b	b	b	b	b	b	b	b	b	a	b	b	a	a	a	b	b	b	b
IWB69999	a	a	b	b	b	b	b	a	a	b	b	b	b	b	b	b	b	b	b	b	b	b	b	b	a	a	b	b	b	a	b	a	a	a	a	b	b	a	a	a	a	b	a	a	a	a	a	b	a
IWA2886	a	b	a	a	a	a	a	a	a	a	a	a	a	a	a	a	a	a	a	a	a	b	a	a	b	a	a	a	b	a	a	b	a	a	b	a	a	a	a	a	a	a	a	a	a	a	a	a	a
IWB48913	b	b	b	b	a	b	b	b	b	b	b	a	a	b	a	a	b	b	b	b	a	a	a	b	a	a	b	a	a	b	a	a	a	a	a	a	a	a	a	a	a	a	b	a	a	a	a	b	b
IWA2037	b	b	b	a	a	a	a	a	b	b	a	a	b	b	b	a	a	a	b	a	b	a	b	b	b	b	b	b	b	b	a	b	b	b	b	a	b	a	b	b	b	b	b	b	b	b	b	b	a
IWB54440	b	a	a	a	b	b	b	a	a	a	a	b	b	b	b	a	b	b	b	a	b	a	a	b	b	a	b	b	b	b	b	b	b	b	a	a	a	b	b	b	b	b	b	b	b	b	b	a	b
IWA6158	b	b	b	a	a	b	b	a	a	a	a	b	b	b	b	a	a	a	a	a	b	a	b	b	b	b	b	a	a	b	b	b	b	b	a	b	b	b	b	b	b	b	b	b	-	b	b	b	b
IWA2763	b	b	a	a	a	a	a	a	b	b	b	a	b	a	a	a	a	a	a	b	b	b	b	b	a	a	b	b	b	b	b	b	b	b	b	b	b	b	b	b	b	b	b	b	b	b	b	b	b
IWA5969	b	a	a	b	b	b	b	b	b	b	b	b	b	b	b	b	b	b	b	b	b	b	a	a	a	a	b	b	b	a	b	a	a	a	b	b	a	b	b	b	b	b	b	b	b	b	b	b	a
IWB8515	a	a	b	a	b	b	b	a	a	a	a	b	b	b	b	a	b	b	b	a	b	a	a	a	b	a	a	b	b	b	b	b	b	b	a	a	b	b	b	b	b	b	b	b	b	a	b	a	a
IWB58359	-	b	a	b	b	a	a	b	b	b	b	b	a	a	a	b	b	b	b	b	a	b	a	a	a	a	a	a	b	a	a	a	a	a	b	a	a	a	a	a	a	a	a	a	a	a	a	a	a
IWB58918	a	a	a	a	a	b	b	a	a	b	a	a	a	b	a	a	a	a	a	a	a	a	a	a	a	a	a	a	a	a	a	a	a	a	a	a	a	a	a	a	a	a	a	a	a	a	a	a	a
IWB23258	b	b	b	b	b	b	b	b	b	b	b	b	a	b	b	b	b	b	b	b	b	b	b	b	b	b	b	b	a	b	b	b	b	b	b	b	b	b	b	b	b	a	b	b	a	b	a	b	b
IWB35610	a	b	b	a	b	a	a	a	b	a	a	b	a	a	b	b	a	a	a	a	b	b	b	b	b	b	b	b	b	a	b	b	b	b	b	b	b	b	b	b	b	b	b	b	b	b	b	b	a
IWB22606	a	a	b	b	b	a	a	b	b	a	b	b	a	a	b	b	b	b	b	b	b	b	a	a	b	a	b	b	b	a	b	b	b	b	b	b	b	b	b	b	b	b	b	b	b	b	b	b	b
IWB31017	a	b	-	a	b	b	b	b	a	b	b	b	b	a	a	b	a	a	b	a	a	b	a	a	a	a	a	a	a	a	b	a	a	a	b	b	b	a	a	a	a	a	a	a	a	a	a	b	b
IWB51093	b	b	a	b	b	b	b	a	a	a	a	b	a	b	a	b	b	b	b	a	a	a	a	b	b	a	b	a	b	b	a	b	b	b	a	b	a	a	a	a	a	a	a	a	a	a	a	a	b
IWB42890	a	b	a	a	a	a	a	a	b	a	a	a	a	a	a	a	a	a	a	a	a	b	b	a	a	b	b	a	a	a	a	a	a	a	b	a	b	b	a	a	a	a	a	a	a	a	a	a	a
IWB65503	b	a	a	a	b	b	b	a	b	a	a	a	a	b	a	a	b	b	a	a	a	b	b	a	a	b	b	a	a	a	a	a	a	a	b	a	b	b	a	a	a	a	a	a	a	a	a	a	a
IWB41434	b	b	b	b	b	a	a	b	b	b	b	a	a	b	b	b	b	b	b	b	b	b	b	b	b	b	b	a	b	b	b	a	a	a	-	b	b	b	a	a	a	a	a	a	a	a	a	b	b
IWA3198	a	a	b	b	b	a	a	a	a	a	a	a	a	b	a	b	a	a	a	b	a	a	a	b	a	a	a	a	a	b	b	a	b	b	a	b	a	a	a	a	a	a	b	a	a	a	a	b	b
IWA211	b	a	a	a	a	a	a	b	a	a	a	a	a	a	a	a	a	a	a	a	b	a	a	b	b	b	b	a	b	a	a	a	a	a	a	a	a	a	b	b	b	b	b	b	a	b	a	a	a
IWB49980	b	b	b	a	a	b	b	b	a	a	a	b	b	b	b	a	a	a	a	b	b	a	a	b	b	b	b	b	b	b	b	b	b	b	b	a	a	b	b	b	b	b	b	b	b	b	b	a	a
IWB11894	a	b	b	b	b	a	a	a	a	a	b	a	a	b	b	b	b	b	b	a	b	b	b	b	a	a	a	a	b	a	b	b	b	b	b	b	b	b	b	b	b	b	b	b	b	b	b	b	b
IWA1999	b	a	b	b	b	b	b	b	b	b	b	b	a	b	b	b	b	b	b	b	a	a	b	b	b	b	b	b	a	b	b	a	b	b	a	b	b	b	b	b	b	b	b	b	b	b	b	b	b
IWB14885	b	b	a	b	a	a	a	b	b	b	b	a	a	a	a	b	a	a	a	b	a	b	b	b	a	b	a	a	a	a	a	b	b	b	b	b	b	b	a	a	a	a	a	a	a	a	a	b	b
IWB72700	b	b	a	a	a	a	a	b	b	a	b	a	a	a	a	a	a	a	a	b	a	a	b	a	a	b	a	a	a	a	a	a	a	a	b	a	b	b	a	a	a	a	a	a	a	a	a	a	b
IWB54481	a	a	a	a	a	a	a	b	a	a	a	a	a	a	a	a	a	a	a	b	a	a	a	a	a	a	a	a	a	a	a	a	a	a	a	a	a	a	b	b	a	b	b	b	b	b	b	a	b
IWA7905	b	a	a	a	a	b	b	b	a	a	a	b	b	a	a	a	a	a	a	a	a	a	a	a	a	b	a	a	a	b	a	b	b	b	a	a	a	a	a	a	a	a	a	a	a	a	a	a	a
IWB13522	a	a	b	a	a	a	a	b	b	b	b	b	a	b	b	a	a	a	a	b	a	a	b	b	b	a	a	b	b	a	b	b	b	b	a	b	b	a	b	b	b	b	a	b	b	b	b	b	b
IWA6777	b	a	b	b	b	b	b	b	a	b	b	a	a	a	b	a	a	a	a	b	a	b	a	a	a	a	a	b	b	b	a	a	a	a	b	b	b	a	a	a	a	a	b	a	a	b	a	b	a
IWB1821	b	b	b	b	b	b	b	b	b	b	b	b	b	b	b	b	b	b	b	b	b	b	b	b	b	b	a	b	b	b	b	a	a	a	b	b	b	b	b	b	b	b	b	b	b	b	b	b	b
IWB74099	b	b	b	b	b	b	b	b	b	b	b	b	b	b	b	b	b	b	b	b	b	b	b	b	b	b	b	b	b	b	b	b	b	b	b	b	b	a	b	b	b	b	b	b	b	b	b	b	a
IWB53481	a	b	b	a	b	b	a	b	b	b	a	b	b	b	b	a	b	b	b	b	b	b	b	b	b	b	b	b	b	b	b	a	a	a	b	b	b	b	b	b	b	a	b	b	b	b	b	b	b
IWB34796	a	a	a	a	a	a	a	b	a	a	a	a	a	a	a	a	a	a	a	a	a	a	a	b	b	a	b	a	a	a	a	a	a	a	a	b	a	a	a	a	a	a	a	a	a	a	a	b	a
IWA236	b	b	b	b	b	b	b	a	b	b	b	b	b	b	b	b	b	b	b	b	b	b	b	b	b	b	b	b	b	b	b	b	b	b	b	b	b	b	b	b	b	b	b	b	b	b	b	b	b
IWB8217	b	a	a	b	b	b	b	a	b	b	b	b	b	b	a	b	b	b	b	a	b	b	b	b	b	b	a	a	b	b	a	b	b	b	a	a	b	b	a	a	a	a	a	a	a	a	b	a	b
IWB3336	b	a	b	a	a	a	a	b	b	b	b	b	b	b	b	a	a	a	b	b	b	b	b	b	b	b	b	b	b	b	b	b	b	b	b	b	b	b	b	-	b	b	b	b	b	b	b	b	b
IWB16977	a	b	a	b	a	b	b	b	b	a	a	b	b	b	a	b	a	a	b	b	b	a	a	b	a	a	b	b	a	a	b	a	a	a	a	b	a	a	b	b	b	b	a	b	b	b	b	b	b
IWA4425	b	a	b	a	a	a	a	b	b	b	b	a	a	a	a	a	a	a	a	b	a	a	b	a	a	b	a	b	a	b	a	b	b	b	b	a	a	b	b	a	b	a	a	b	b	b	b	b	b
IWB32544	b	b	b	a	a	a	a	a	b	a	b	b	a	b	b	a	a	a	a	b	b	b	b	b	b	a	b	a	a	b	b	a	a	a	b	a	b	b	a	a	b	b	a	b	b	a	a	b	a
IWB36596	b	a	a	a	a	a	a	a	a	a	a	a	a	b	b	a	b	b	a	a	a	b	b	a	b	b	a	a	b	a	b	a	a	a	a	b	a	a	b	b	b	a	b	b	a	a	a	a	b
IWB45291	b	a	b	a	a	b	a	b	a	a	a	a	a	a	a	b	a	a	a	a	a	a	a	a	a	a	a	a	a	a	a	b	b	b	a	a	a	a	a	a	b	b	a	b	a	a	b	a	a
IWA3042	b	b	b	b	b	a	a	b	b	b	b	a	a	a	b	b	b	b	b	b	b	a	b	a	a	a	a	a	b	b	b	b	b	b	b	b	a	a	a	b	b	a	b	a	a	a	b	a	a
IWB43659	a	b	a	b	b	b	b	a	b	b	b	b	b	b	b	b	b	b	b	b	b	b	b	b	b	b	b	b	b	b	b	a	b	b	b	b	b	b	b	b	b	b	b	b	b	b	b	b	b
IWA54	a	a	a	b	a	b	a	a	b	b	a	b	b	b	b	a	a	a	b	b	b	a	b	b	b	a	b	b	a	b	b	a	a	a	b	a	b	b	b	b	b	b	b	b	b	b	b	b	b
IWB9	b	b	b	a	a	a	a	a	b	a	a	b	b	a	a	a	a	a	a	b	b	b	a	a	b	b	b	b	b	b	a	b	b	b	b	a	b	b	a	b	b	b	a	b	b	b	b	a	b
IWB8239	a	b	a	a	a	b	b	b	b	a	a	b	a	b	b	a	b	b	a	b	b	b	b	b	b	a	b	a	a	a	b	a	a	a	a	b	b	a	a	a	a	a	b	a	a	a	a	b	b
IWA835	b	b	a	a	a	b	b	b	b	b	b	b	b	a	b	a	a	a	a	a	b	b	a	b	a	b	b	b	a	a	b	b	b	b	b	b	a	a	b	b	b	b	a	b	b	b	b	b	b
IWA2354	a	a	b	a	a	a	a	a	b	a	a	b	b	a	a	a	a	a	a	a	b	a	a	a	b	a	a	b	a	a	a	a	a	a	a	a	a	a	b	a	b	a	a	b	b	a	b	b	b
IWA2120	b	b	b	b	b	b	b	b	b	b	b	b	b	b	b	b	b	b	b	a	b	b	b	b	b	a	b	b	b	a	a	b	b	b	a	a	a	b	b	b	b	b	b	b	b	a	b	b	b
IWA5621	b	a	b	a	b	b	b	a	a	b	b	b	b	b	b	a	b	b	b	b	a	a	b	b	a	b	a	b	a	b	a	b	b	b	a	a	a	a	a	a	a	a	b	a	a	a	a	b	a
IWB62203	b	b	a	b	b	b	b	a	b	b	b	b	b	b	a	b	b	b	b	a	b	b	b	b	b	a	a	b	b	a	b	b	b	b	b	b	b	a	b	b	b	b	a	b	b	b	b	a	b
IWB62493	b	b	a	a	a	b	b	b	b	b	b	b	b	a	a	b	a	a	a	a	b	b	b	b	b	b	a	b	a	a	b	a	a	a	b	b	b	b	b	b	b	b	a	b	b	b	b	a	a
IWB60594	a	b	a	b	b	b	b	b	a	b	b	a	b	b	a	b	b	b	b	b	b	a	b	b	b	b	b	b	b	b	a	a	a	a	b	b	b	b	b	b	b	b	a	b	b	b	b	a	b
IWB61548	b	a	a	b	b	b	b	b	a	b	b	a	a	a	a	a	b	b	b	a	b	a	b	b	a	a	a	a	a	a	a	b	b	b	a	a	a	b	a	a	a	a	a	a	a	a	a	a	a
IWA5517	a	a	a	b	a	b	a	a	a	a	a	a	a	a	a	a	b	b	b	b	b	b	a	b	a	a	a	b	a	a	a	a	a	a	a	a	a	a	b	a	a	b	a	b	b	b	b	a	a
IWA8118	b	a	b	a	a	a	a	a	b	a	a	b	a	a	b	a	a	a	a	a	a	b	a	a	a	a	a	a	a	a	b	b	b	b	a	a	a	a	a	a	a	a	b	a	a	a	a	b	a
IWB63903	-	b	a	b	a	b	b	b	b	a	b	a	a	a	a	a	b	b	b	a	a	b	b	b	b	a	a	a	a	b	b	a	a	a	b	a	b	b	a	a	a	a	a	a	a	a	a	a	b
IWA5670	a	a	a	a	a	a	a	a	a	b	a	a	a	a	a	b	a	a	a	b	a	a	a	a	a	a	a	b	a	a	a	a	a	a	a	b	a	a	a	a	a	a	a	a	a	a	a	a	a
IWA2610	b	b	b	a	a	a	a	a	b	a	a	a	a	b	b	a	a	a	a	a	a	a	a	a	b	b	a	a	a	a	a	b	b	b	b	b	b	a	a	a	a	a	a	a	a	a	a	a	b
IWB42078	a	b	a	a	b	b	a	b	b	a	a	b	b	b	a	a	b	b	b	b	a	b	b	b	b	b	b	b	b	b	b	b	b	b	b	b	b	b	a	b	b	a	b	a	a	a	a	b	b
IWB8807	b	b	b	b	b	b	b	b	b	b	b	a	a	b	b	b	b	b	b	a	a	b	b	b	b	b	a	a	b	b	b	b	b	b	b	b	b	a	a	a	a	b	b	b	b	a	b	b	a
IWB12027	b	b	b	b	a	b	b	b	b	b	b	b	a	a	b	b	a	a	a	a	a	b	b	a	a	b	b	a	a	a	b	a	a	a	b	b	b	a	a	b	a	a	b	a	a	a	a	b	b
IWB28312	a	a	a	b	b	b	a	a	a	a	a	a	a	b	a	a	a	a	a	b	a	a	b	a	a	a	a	a	a	b	a	b	b	b	a	b	a	a	a	a	a	a	a	a	a	a	a	a	a
IWA7372	b	b	b	b	a	a	b	b	b	b	b	b	b	b	b	b	a	a	a	a	b	a	b	b	b	b	b	a	b	b	b	b	b	b	b	b	b	b	b	b	b	b	b	b	b	b	b	b	b
IWB11392	b	b	b	b	b	b	b	b	b	a	a	b	b	a	b	b	b	b	b	b	a	a	b	b	b	b	b	a	b	b	b	a	a	a	b	b	b	b	a	b	b	b	b	b	b	b	b	b	b
IWB54375	a	a	a	b	b	b	a	b	a	a	b	b	a	b	a	b	b	b	b	b	a	a	b	b	a	b	a	a	a	b	b	b	b	b	a	b	a	a	a	a	a	a	a	a	a	a	a	a	b
IWB12740	a	b	b	a	a	a	b	a	b	b	b	b	b	a	b	a	a	a	a	a	a	a	a	a	b	b	b	a	b	b	a	a	a	a	b	b	b	a	a	b	b	a	b	a	a	a	a	b	a
IWA4634	a	b	a	a	a	b	a	a	b	a	a	a	b	a	a	a	a	a	a	a	b	b	b	a	a	b	a	a	a	a	b	a	a	a	b	a	b	b	a	a	a	a	a	b	a	a	a	a	a
IWB65661	-	a	a	a	a	a	a	b	a	a	a	a	b	a	a	a	a	a	a	a	b	a	a	a	a	a	a	b	a	a	b	a	a	a	a	a	a	a	b	b	b	a	b	b	b	b	a	a	a
IWA1569	b	a	b	a	a	b	b	a	a	b	b	a	b	b	a	a	a	a	a	a	a	a	a	a	a	b	a	a	a	a	a	b	b	b	b	b	a	a	b	b	b	b	a	b	a	a	a	a	a
IWA2093	a	a	a	a	a	b	b	a	a	a	a	a	a	b	a	a	a	a	a	a	a	a	a	a	a	a	a	a	a	a	a	a	a	a	a	a	a	a	a	a	a	a	a	a	a	a	a	a	a
IWB40787	b	a	a	a	a	b	a	a	a	a	a	a	a	a	a	a	a	a	a	a	a	a	a	a	a	a	a	a	a	a	a	a	a	a	a	a	a	a	a	a	a	a	a	a	a	a	a	a	a
IWB49676	b	a	a	a	a	a	a	b	a	a	a	a	a	a	a	a	a	a	a	a	a	a	a	a	a	a	a	a	a	a	a	a	a	a	a	a	a	a	a	a	a	b	a	a	a	b	a	a	a
IWB24805	a	a	a	a	a	a	a	a	a	a	a	a	a	a	a	a	a	a	a	a	b	a	a	a	a	a	a	a	a	a	a	a	a	a	a	a	a	a	a	a	b	a	a	a	a	a	b	a	a
IWB52905	b	a	b	b	b	b	b	b	b	b	b	b	b	b	b	b	b	b	b	b	b	b	a	a	a	a	b	a	b	b	b	b	b	b	a	b	a	a	b	b	b	b	b	b	b	b	b	b	a
IWB28729	b	a	a	a	a	a	a	a	a	a	a	a	a	a	a	a	a	a	a	a	a	a	a	a	a	a	a	a	a	a	a	a	a	a	a	a	a	a	a	a	a	a	a	a	a	a	a	a	a
IWB33925	b	b	b	b	b	b	b	b	b	b	b	a	b	b	b	b	b	b	b	b	a	b	b	b	b	b	b	b	b	b	b	b	b	b	b	b	b	b	a	b	a	b	b	b	b	b	b	b	b
IWB14018	b	b	b	b	b	b	b	b	b	b	b	b	b	b	b	b	b	b	b	b	b	b	b	b	b	b	b	b	b	b	a	b	b	b	a	b	a	b	b	b	b	b	b	b	b	b	b	b	b
IWB23818	a	a	a	b	b	b	b	b	a	a	a	b	b	a	b	b	a	a	b	b	b	a	b	b	a	a	b	b	a	b	b	a	a	a	a	b	a	a	b	b	b	b	b	b	b	b	b	b	b
IWB7281	b	a	b	a	b	a	a	a	b	a	a	b	b	b	b	a	a	a	a	b	a	b	a	a	b	b	b	a	b	b	b	b	b	b	a	a	a	a	a	a	a	a	b	a	a	b	a	b	b
IWB66118	b	b	b	b	b	b	b	b	b	b	b	b	a	b	b	b	b	b	b	b	b	b	b	b	b	b	b	b	b	b	a	b	b	b	b	b	b	b	b	b	b	b	b	b	b	b	b	b	b
IWA7974	a	a	a	b	b	a	a	b	a	b	-	a	a	a	a	b	b	b	b	a	b	b	b	a	a	b	b	a	a	-	a	a	a	a	b	b	b	a	b	b	b	a	a	b	b	a	a	a	a
IWB31535	a	a	a	a	a	a	a	a	a	a	-	a	a	a	b	a	a	a	a	a	a	a	a	a	a	a	a	a	a	a	a	a	a	a	a	a	a	a	a	a	a	b	a	a	a	a	b	a	a
IWB7284	b	b	b	b	b	b	b	a	b	b	b	b	b	b	b	b	b	b	b	b	b	b	b	b	b	b	b	b	b	b	b	b	b	b	b	b	b	b	b	b	b	b	b	b	b	b	b	b	b
IWA1545	a	a	b	a	a	a	a	a	b	a	a	a	a	b	a	a	a	a	a	a	a	a	a	a	b	a	a	a	a	a	a	b	b	b	a	a	a	a	a	a	a	a	a	a	a	a	a	a	a
IWA6811	b	b	b	b	b	b	b	a	b	a	a	b	b	a	b	b	b	b	b	b	a	b	b	b	b	b	a	a	b	b	b	b	b	b	a	a	b	a	a	a	a	a	b	a	a	b	a	b	a
IWB53703	a	a	a	a	a	b	b	a	b	a	a	a	b	a	b	a	a	a	a	a	a	a	b	b	a	a	a	a	a	a	a	b	b	b	a	a	a	a	a	b	b	a	a	a	a	a	a	a	b
IWB22878	b	b	b	a	a	b	b	a	b	a	a	b	b	b	b	a	a	a	a	a	a	a	a	b	b	a	a	a	a	b	a	b	b	b	a	a	a	a	a	a	a	a	a	a	a	b	a	b	b
IWB41585	a	a	b	a	b	a	a	a	a	a	a	a	a	b	b	a	a	a	a	a	b	a	a	b	a	a	a	a	b	a	a	a	a	a	a	a	a	a	a	a	a	a	a	a	a	a	b	a	a
IWB36646	b	a	b	a	a	b	b	b	b	a	b	b	a	b	a	a	a	a	a	a	b	a	a	a	b	a	a	a	a	a	b	b	b	b	a	a	a	a	a	a	a	a	a	a	a	b	b	a	a
IWB55718	b	a	b	a	a	b	b	b	b	a	b	b	b	a	a	a	a	a	a	a	b	a	a	b	a	a	a	a	b	b	b	b	b	b	a	a	a	a	a	a	a	a	b	a	a	b	b	b	a
IWB74420	a	a	a	a	a	a	a	b	b	a	a	a	b	a	a	a	a	a	a	a	a	a	b	a	a	a	a	a	a	a	a	a	a	a	a	b	b	a	a	a	a	a	a	a	a	a	a	a	a
IWB33770	b	b	b	b	b	a	a	b	b	b	b	a	a	a	a	b	b	b	b	a	b	b	a	a	b	b	b	b	b	a	a	b	b	b	b	b	b	b	b	b	b	b	a	b	b	a	b	a	a
IWB42344	b	b	b	b	b	b	b	a	b	b	b	a	a	b	b	b	b	b	b	b	b	b	b	b	b	b	b	a	b	b	b	b	a	a	a	a	a	a	b	b	b	b	b	b	b	b	b	b	b
IWA4112	b	b	b	b	b	b	b	b	b	b	b	b	b	a	b	b	b	b	b	a	b	b	a	b	b	b	b	b	b	b	b	b	a	a	b	b	b	b	b	b	b	b	a	b	b	b	b	a	b
IWB71551	b	a	b	b	b	b	b	b	a	a	a	a	b	a	a	b	b	b	b	a	a	a	a	a	a	a	a	a	a	b	a	b	b	b	a	a	a	a	a	a	a	a	a	a	a	b	b	b	a
IWB11021	b	a	b	a	a	b	b	b	b	a	b	b	b	b	b	a	a	a	a	b	b	a	a	b	b	a	a	b	b	b	b	b	b	b	a	a	a	a	b	b	b	b	a	b	b	b	b	b	b
IWB28803	b	b	b	b	b	b	b	b	a	b	a	b	a	b	a	b	b	b	b	b	a	b	b	-	a	b	b	b	b	b	a	b	b	b	b	a	b	a	b	b	b	b	b	b	b	b	b	b	a
IWA7452	b	b	a	b	b	b	b	b	a	b	b	b	b	b	a	b	b	b	b	a	a	b	b	a	b	b	b	a	a	b	b	b	b	b	b	b	b	b	a	a	a	b	a	a	a	b	a	a	a
IWB43368	-	a	b	a	a	a	a	a	a	a	a	a	b	a	b	a	a	a	a	b	a	b	b	b	a	b	a	a	a	a	a	b	b	b	a	a	b	a	a	a	a	a	b	a	a	b	a	b	a
IWB59264	a	b	a	a	b	a	a	a	a	a	a	b	b	a	a	a	a	a	b	a	a	b	b	a	a	a	a	b	b	b	b	a	a	a	b	a	b	b	a	a	a	b	a	b	a	a	a	a	a
IWA6247	a	b	a	b	a	b	b	a	a	b	b	a	a	a	a	b	b	b	b	b	b	b	b	b	a	a	a	b	a	a	a	a	a	a	b	b	b	b	b	b	b	b	a	b	b	b	b	b	b
IWB20143	b	b	b	b	b	b	b	a	b	b	b	b	b	b	b	b	b	b	b	b	b	b	b	b	b	a	b	b	b	b	b	b	b	b	a	a	a	b	b	b	b	b	b	b	b	b	b	a	a
IWB30765	a	a	a	a	a	a	a	a	a	a	a	a	a	a	b	a	a	a	a	a	a	b	a	a	a	a	b	a	a	a	a	a	a	a	a	b	a	a	a	a	a	a	a	a	a	a	a	b	a
IWA4612	-	a	a	a	a	a	a	a	a	a	a	b	a	a	a	a	a	a	a	a	a	a	a	a	a	a	a	a	a	a	a	a	a	a	a	a	a	a	a	a	a	a	a	a	a	a	a	a	a
IWB6123	b	a	b	b	b	a	a	a	b	b	a	b	b	b	a	b	b	b	b	b	b	b	b	b	b	b	a	b	b	b	a	a	a	a	b	b	a	b	b	b	b	b	b	b	b	a	b	b	b
IWB65197	b	a	b	a	a	a	a	b	a	a	b	a	a	a	a	a	a	a	a	a	a	a	a	a	b	a	b	a	a	a	a	a	a	a	a	b	a	a	a	a	a	a	a	a	a	b	a	a	b
IWB35405	b	a	b	b	b	b	b	b	b	a	a	b	b	b	b	b	b	b	b	b	b	a	b	b	b	b	b	b	a	a	a	b	b	b	a	a	a	b	b	b	b	b	b	b	b	b	b	b	a
IWB71941	b	b	a	a	a	a	a	b	a	a	a	b	a	a	b	a	b	b	a	b	a	a	a	a	a	a	a	b	b	a	a	a	a	a	a	a	a	a	a	a	a	a	a	b	a	a	a	a	a
IWB14050	b	a	a	b	b	b	b	b	b	b	b	b	b	b	a	b	b	b	b	b	a	b	b	a	a	b	b	a	b	a	a	b	b	b	b	a	b	b	b	b	b	a	a	a	b	a	b	a	a
IWA4728	a	b	b	b	b	b	b	b	a	b	b	a	a	a	b	b	b	b	b	b	b	a	b	a	a	b	a	b	b	b	b	a	a	a	a	b	b	a	b	a	a	a	b	b	a	b	b	b	a
IWB46972	b	b	a	a	a	a	a	b	b	a	a	b	b	b	b	a	b	b	a	b	a	b	a	b	b	a	b	b	b	a	a	b	b	b	b	a	a	b	a	b	b	b	a	b	b	a	a	a	b
IWB63948	a	a	a	a	a	a	a	a	a	a	a	b	b	b	a	a	b	b	a	b	a	b	a	a	a	a	b	b	b	a	a	a	a	a	b	a	a	b	a	b	b	b	a	b	b	a	a	a	b
IWB8647	a	b	b	a	a	a	a	a	a	a	b	a	a	a	b	a	a	a	a	a	b	a	a	b	b	a	a	b	a	b	b	b	b	b	b	b	b	a	a	a	a	b	b	b	a	b	a	b	b
IWA476	b	b	a	b	b	b	b	b	b	b	b	b	b	a	a	b	b	b	b	b	b	a	a	b	b	b	b	b	a	b	a	b	b	b	b	b	b	b	b	b	b	b	a	b	b	b	b	a	b
IWB53344	a	b	a	b	b	b	b	a	a	b	b	a	a	a	a	b	b	b	b	a	a	a	a	a	a	b	b	a	a	b	a	a	a	a	b	a	a	a	a	a	a	a	a	a	a	a	a	a	a
IWA277	a	b	b	b	b	b	b	a	b	b	b	b	a	a	b	b	b	b	b	b	a	b	b	b	b	b	b	a	b	a	a	b	b	b	b	b	b	a	b	b	b	a	b	a	a	b	a	b	b
IWB62820	a	a	b	b	b	b	b	b	b	b	b	b	b	b	b	b	b	b	b	a	b	b	b	a	b	b	b	a	b	b	b	a	a	a	b	b	b	a	a	a	a	b	b	a	a	b	b	b	b
IWA7083	a	b	a	b	b	b	b	b	b	b	b	b	b	a	b	b	b	b	b	a	b	a	b	b	b	b	b	a	a	a	b	a	a	a	b	b	b	b	a	b	b	b	b	a	b	b	b	a	b
IWA635	a	a	b	a	a	a	a	a	a	a	a	a	a	b	b	a	a	a	a	a	a	b	b	a	a	a	a	a	b	a	b	a	a	a	a	a	a	a	a	a	a	a	b	a	a	a	a	b	a
IWB58968	b	a	a	a	a	a	a	a	a	a	a	a	a	b	a	a	a	a	a	b	b	a	a	a	a	b	b	b	b	a	a	a	b	b	a	b	b	a	b	b	b	b	a	b	b	b	b	a	a
IWA5434	a	a	b	a	a	a	a	b	b	a	a	a	b	b	b	a	a	a	a	b	b	b	b	a	b	a	a	b	b	a	b	a	a	a	a	b	b	b	b	b	b	b	b	b	b	b	b	b	b
IWA7053	a	a	a	a	a	a	a	a	a	a	a	a	a	b	b	a	a	a	a	a	a	b	a	a	a	b	a	a	a	b	b	b	b	b	b	b	a	b	b	a	b	a	b	b	b	a	a	a	a
IWB12020	b	b	a	b	b	a	a	a	a	b	b	b	b	b	b	b	b	b	b	b	b	b	a	b	b	b	b	b	a	a	b	b	b	b	b	b	b	b	b	b	b	b	b	b	b	b	b	b	a
IWB63518	b	a	a	a	a	a	a	a	a	a	a	a	a	a	a	a	a	a	a	b	a	a	a	b	b	a	a	b	a	a	a	b	b	b	a	a	a	b	a	b	b	b	a	b	b	a	a	a	a
IWB29819	a	a	a	a	a	a	a	b	a	a	a	a	b	a	a	b	b	b	b	a	a	a	a	a	a	a	a	a	a	a	a	a	a	a	a	a	a	a	a	b	a	a	b	a	a	a	a	a	a
IWA7942	b	a	b	b	b	b	b	b	b	b	b	b	b	a	a	a	b	b	b	b	b	a	b	b	b	b	b	b	a	a	b	b	b	b	a	a	b	b	b	b	b	b	b	b	b	b	b	a	b
IWB72925	a	a	b	b	b	b	b	b	b	a	a	b	b	b	b	b	b	b	b	a	b	b	b	b	b	b	a	b	b	b	b	b	b	b	a	b	b	b	b	b	b	b	b	b	b	b	b	b	a
IWB451	a	b	a	b	b	b	b	b	b	a	a	b	b	a	b	b	b	b	b	b	b	a	b	b	b	b	b	b	a	b	b	b	b	b	a	b	b	b	b	b	b	b	b	b	b	b	b	b	a
IWB7803	b	b	a	a	a	a	a	a	a	a	a	b	a	a	b	a	a	a	a	a	a	a	a	a	a	a	a	a	a	b	a	b	b	b	a	b	a	b	b	a	a	a	a	a	a	a	b	b	b
IWA7830	-	a	a	a	a	a	a	a	b	a	a	b	b	b	a	a	a	a	a	b	a	b	a	b	b	a	b	a	a	a	a	a	a	a	b	a	a	b	a	a	a	a	a	a	a	a	b	a	b
IWA8161	a	a	b	a	a	a	a	b	a	a	a	b	b	a	b	a	a	a	a	b	b	b	b	b	b	b	b	b	a	a	a	a	a	a	b	b	b	b	b	a	b	a	b	a	b	b	b	b	b
IWB50931	a	a	a	b	b	a	a	a	a	a	a	a	a	a	a	a	b	b	a	a	a	a	a	a	a	a	a	a	a	a	a	a	b	b	b	a	a	b	a	b	b	a	b	a	a	a	a	b	a
IWB37134	b	b	b	b	b	b	b	b	a	b	b	b	b	b	b	b	b	b	b	a	a	b	b	b	a	b	b	a	b	b	b	b	b	b	b	a	b	b	b	a	b	a	b	a	b	b	b	b	b
IWA6717	b	b	a	b	b	b	b	b	b	b	b	b	b	a	b	b	b	b	b	b	b	a	b	b	b	b	b	b	a	b	b	b	b	b	b	b	b	b	b	b	b	b	b	b	b	b	b	b	b
IWA7403	b	b	b	b	a	a	a	a	b	a	a	b	b	a	b	a	a	a	b	b	b	a	b	b	b	a	b	b	b	b	a	b	b	b	a	b	a	a	b	b	b	b	b	b	b	b	b	b	a
IWB3376	b	a	a	a	a	a	a	a	a	a	a	a	a	a	a	a	a	a	a	a	a	a	a	a	a	a	a	a	a	a	a	a	a	a	a	a	a	a	a	a	a	a	a	a	a	a	a	a	a
IWB41511	b	a	a	a	a	a	a	a	a	a	a	a	a	b	a	a	a	a	a	a	a	a	a	a	a	a	a	a	a	a	b	a	a	a	b	a	a	a	a	a	a	a	a	a	a	a	a	a	a
IWB60153	b	a	a	a	a	a	a	a	a	a	a	b	a	a	a	a	a	a	a	a	b	a	a	a	a	a	b	a	a	a	b	b	b	b	a	b	b	a	a	a	a	a	a	b	a	b	a	a	a
IWB25107	a	a	a	b	b	a	a	a	a	a	a	a	a	a	a	b	b	b	b	a	a	a	a	a	a	a	b	a	a	a	a	a	a	a	a	a	a	a	a	a	a	a	a	a	a	a	a	a	a
IWA5258	b	a	b	a	a	a	a	a	b	a	a	b	a	a	a	a	a	a	a	a	a	a	a	a	b	b	b	a	a	a	a	b	b	b	a	a	a	a	a	a	a	a	a	a	a	a	a	a	b
IWA2273	b	b	b	a	b	a	a	b	a	a	a	a	a	a	b	a	a	a	b	a	b	b	b	a	a	a	b	a	a	b	b	b	b	b	a	b	b	b	b	b	b	b	b	b	b	b	b	b	a
IWA1032	a	a	a	a	a	b	b	a	b	b	b	a	a	a	a	a	a	a	b	a	a	a	a	a	b	a	b	a	b	b	b	a	a	a	a	a	b	a	a	b	b	b	b	b	a	b	a	a	b
IWB11047	b	b	a	b	b	b	b	a	a	a	a	a	a	b	a	b	a	a	a	a	a	a	b	a	b	a	a	a	b	a	a	a	a	a	b	a	a	a	b	b	a	a	a	b	b	a	a	a	a
IWB40881	b	a	a	b	b	b	b	a	a	b	b	b	a	b	a	b	b	b	b	a	a	a	a	a	b	a	a	a	b	b	b	b	b	b	a	b	b	a	a	b	a	b	a	b	a	a	a	b	b
IWB48454	b	-	b	a	b	b	b	b	b	b	b	b	b	b	b	b	b	b	a	b	b	b	b	b	b	a	b	b	b	b	b	a	b	b	b	b	a	b	a	a	a	a	b	b	a	a	b	a	b
IWA3003	b	a	a	a	a	a	a	a	a	a	b	b	a	a	b	a	a	a	b	b	b	b	b	b	a	b	a	b	a	a	b	b	b	b	a	b	b	b	b	a	b	b	a	b	a	a	a	a	b
IWB13379	a	a	a	b	a	a	a	b	a	a	a	a	a	a	a	a	a	a	a	a	a	a	a	a	b	a	b	a	a	a	a	a	a	a	a	a	b	a	b	a	a	a	a	a	a	a	a	b	a
IWB52305	a	a	a	b	b	b	b	a	a	a	a	b	a	b	a	b	b	b	b	b	b	a	a	a	b	a	a	b	b	b	b	b	b	b	a	b	a	a	b	b	b	b	b	b	b	b	b	a	b
IWA2084	b	a	a	b	b	a	a	b	a	b	b	a	b	a	a	b	b	b	b	a	a	a	a	a	-	a	a	b	a	-	a	b	b	b	a	a	b	a	b	a	b	a	a	a	b	b	a	a	b
IWB64595	a	a	a	b	a	a	a	b	a	b	b	b	b	b	a	b	a	a	b	a	a	a	a	a	a	a	a	a	a	a	b	b	a	a	b	a	a	b	a	a	a	a	a	a	a	b	a	a	a
IWB59865	a	b	a	a	a	a	a	a	a	a	a	a	b	a	a	a	a	a	a	a	a	b	a	b	b	a	a	a	a	b	b	b	a	a	a	a	a	a	a	a	a	a	a	a	a	b	a	a	a
IWB47933	a	b	a	a	b	b	b	b	b	b	a	b	a	a	a	a	b	b	b	b	b	b	a	a	a	b	b	b	b	b	b	a	a	a	b	b	b	a	a	b	a	b	a	a	a	a	a	b	a
IWB8004	b	b	a	b	b	a	a	a	b	b	a	a	b	a	a	a	b	b	b	b	b	a	b	a	b	b	b	b	a	b	a	a	a	a	b	a	a	a	b	b	b	b	b	b	b	b	b	b	a
IWB62507	b	a	a	a	a	a	a	a	a	a	a	a	b	a	a	a	a	a	a	a	b	a	a	a	b	a	a	b	a	b	a	a	a	a	a	a	b	a	b	b	b	b	b	b	b	b	b	a	a
IWA1613	b	b	a	a	a	a	a	a	b	a	b	a	b	a	a	a	a	a	a	a	a	b	b	b	b	a	a	a	a	b	a	a	a	a	b	a	b	b	a	a	a	a	a	a	a	a	a	a	a
IWB31651	a	a	a	a	a	a	a	a	a	a	a	b	a	b	b	a	a	a	a	a	b	a	a	a	b	a	a	b	a	b	b	a	a	a	b	b	a	b	b	b	b	b	a	b	b	b	b	a	b
IWB7965	b	b	a	a	a	a	a	b	b	b	b	a	b	a	a	a	a	a	a	a	a	a	a	a	a	a	a	a	a	a	a	a	a	a	b	a	b	a	b	b	b	b	a	b	b	b	b	a	b
IWA5174	a	b	a	b	a	a	a	b	b	a	b	a	a	a	a	a	a	a	a	b	-	b	a	a	a	a	b	b	b	a	a	b	b	b	b	a	b	b	a	a	a	a	a	a	a	a	a	a	b
IWB73112	-	a	a	b	b	b	b	b	b	b	b	b	b	b	a	b	b	b	b	b	b	b	b	a	a	a	a	b	b	a	a	b	b	b	b	b	a	b	b	b	b	b	a	b	b	a	b	b	b
IWB35955	b	b	a	a	a	a	a	b	b	b	b	b	a	b	a	a	a	a	a	b	b	b	b	a	b	b	b	b	a	a	b	b	b	b	b	b	b	b	b	b	b	b	b	b	b	b	b	b	a
IWB70380	-	b	a	a	a	a	a	a	a	b	a	b	a	b	a	a	a	a	a	b	a	b	a	a	b	a	b	a	b	b	a	a	a	a	b	a	b	b	a	a	a	a	a	a	a	a	a	a	b
IWB14950	b	a	a	b	b	b	b	b	a	b	b	b	a	b	b	b	b	b	a	a	a	a	b	b	b	a	b	a	a	b	b	b	b	b	a	a	a	a	a	a	a	a	a	a	a	a	a	a	a
IWB35316	b	a	a	b	b	a	a	b	a	b	b	a	b	a	a	b	b	b	b	b	b	a	a	a	-	a	a	b	a	-	b	a	a	a	a	b	b	a	b	b	b	b	b	b	b	b	b	a	a
IWB5323	b	a	a	a	a	a	a	a	a	a	a	a	a	a	a	a	a	a	a	a	a	a	a	a	a	a	a	a	a	a	a	a	a	a	a	a	a	b	a	b	b	a	b	b	b	b	a	a	a
IWA6107	b	a	b	b	b	a	a	b	a	b	b	a	b	a	b	b	b	b	b	b	b	a	a	b	b	b	a	b	a	b	b	b	b	b	a	b	b	b	b	b	b	b	b	b	b	b	b	b	a
IWB11589	b	b	b	a	a	a	a	a	b	a	a	b	a	a	b	a	a	a	a	b	b	b	b	b	b	a	b	b	a	b	b	b	b	b	b	b	b	b	b	b	b	b	b	b	b	b	b	b	b
IWB74145	b	a	b	b	b	b	b	b	a	b	b	b	a	b	b	b	b	b	b	b	a	b	b	a	b	a	b	a	b	b	a	b	b	b	a	b	a	b	a	a	a	a	a	a	a	a	a	b	b
IWA3620	a	b	b	a	a	b	b	a	b	a	a	b	b	b	b	a	a	a	a	b	a	b	b	b	a	b	b	b	b	a	a	b	b	b	b	b	b	b	b	b	a	b	b	b	a	a	b	b	b
IWB11880	a	b	b	a	a	b	b	a	b	a	a	b	a	b	b	a	a	a	a	b	a	b	b	b	b	b	b	b	b	b	a	a	a	a	b	b	a	b	a	a	a	a	a	a	a	a	a	b	a
IWB6354	b	b	b	a	b	b	b	a	b	b	b	b	b	b	b	b	b	b	b	b	b	b	b	b	a	b	a	b	b	b	b	b	b	b	b	b	a	b	a	b	b	b	b	b	b	b	b	a	b
IWB50867	a	b	b	b	b	b	b	b	b	b	a	b	b	b	b	b	b	b	b	b	b	a	b	b	b	b	b	a	b	-	a	b	b	b	a	b	a	a	b	a	a	b	a	b	b	b	b	b	b
IWB45466	b	b	b	b	b	b	b	b	b	b	a	b	a	b	b	b	b	b	b	b	b	b	a	b	b	b	b	b	b	b	a	b	b	b	a	b	a	b	b	b	b	b	b	a	b	b	b	b	b
IWB1803	b	a	b	b	b	b	b	a	a	b	a	b	a	b	a	b	b	b	b	a	b	a	a	a	a	a	a	a	b	a	a	a	a	a	a	a	a	a	b	a	b	a	a	b	b	a	a	a	a
IWB30468	-	b	a	a	a	a	a	a	b	a	a	a	a	a	a	a	a	a	a	a	a	a	a	b	b	a	a	a	a	b	a	a	a	a	a	b	a	a	b	b	a	b	a	a	a	a	b	a	b
IWB21698	a	a	a	a	a	a	a	a	b	b	a	a	a	b	b	a	a	a	a	b	a	a	a	a	a	a	a	a	a	a	a	a	a	a	b	b	a	a	a	b	a	b	b	b	b	a	b	b	a
IWB45623	b	b	a	a	a	b	b	a	a	a	a	b	b	a	a	a	a	a	a	a	b	a	a	a	b	a	a	b	a	b	a	a	a	a	a	a	a	a	b	b	b	b	a	b	b	b	b	a	a
IWB31929	a	b	a	a	a	a	a	a	b	a	a	a	b	a	a	a	a	a	a	b	a	a	b	b	a	b	b	a	a	a	a	b	b	b	b	b	b	a	b	a	a	a	a	b	a	a	a	a	a
IWB72794	b	b	a	b	b	a	a	b	b	a	a	a	b	b	b	b	b	b	b	b	b	b	b	a	a	b	b	b	b	b	b	b	b	b	b	b	b	b	b	a	b	b	b	b	b	b	b	b	b
IWB47886	b	b	a	b	b	b	b	b	a	b	b	a	b	b	a	b	b	b	b	b	a	a	b	b	b	b	a	a	b	b	b	a	a	a	a	b	b	b	b	b	b	a	b	b	b	b	b	b	b
IWB75207	b	b	b	b	b	b	b	a	b	b	b	b	b	b	b	b	b	b	b	b	b	b	b	b	b	a	b	b	a	b	b	b	b	b	b	b	b	b	b	b	b	b	b	b	b	b	b	b	b
IWB3070	b	b	b	b	b	b	b	b	b	a	a	b	a	b	b	b	b	b	b	b	a	b	b	b	b	b	b	a	b	b	b	b	b	b	b	b	b	b	b	b	b	b	b	a	b	b	b	b	b
IWB57335	b	b	b	b	b	b	b	b	b	b	b	b	b	b	b	b	b	b	b	b	b	b	b	b	a	b	b	b	b	a	b	b	b	b	b	b	b	b	b	b	b	b	b	b	b	b	b	b	b
IWB36104	-	b	b	a	a	b	b	a	b	b	a	b	b	a	b	a	a	a	b	b	b	b	a	a	b	a	b	b	a	b	b	b	b	b	b	b	b	a	b	b	b	b	b	b	b	b	b	b	b
IWA3127	b	a	b	a	b	a	a	b	b	b	a	b	b	a	b	a	a	a	b	b	b	b	b	a	b	b	b	b	b	b	b	b	b	b	b	b	b	a	b	b	b	b	b	b	b	b	a	b	b
IWB42859	b	b	a	b	b	b	b	a	b	a	a	a	b	a	a	b	b	b	b	b	b	b	b	a	a	b	b	a	b	b	a	b	b	b	a	b	a	a	a	a	a	b	b	a	a	a	a	b	b
IWB21403	-	b	a	b	b	b	b	b	a	b	b	b	a	b	b	b	b	b	b	a	b	a	a	b	a	b	b	b	b	b	b	a	a	a	b	a	b	a	b	b	b	b	b	b	b	b	b	a	a
IWB65377	a	a	a	a	a	a	a	a	a	a	a	a	a	a	a	a	a	a	a	a	b	a	a	a	a	a	a	b	b	a	a	a	a	a	a	a	a	a	b	b	b	a	b	a	b	a	b	a	a
IWB52349	a	a	a	b	b	b	b	a	a	b	b	b	a	a	a	b	b	b	b	a	a	a	a	a	a	a	a	a	a	a	a	b	b	b	a	a	a	a	a	a	a	b	b	b	a	a	b	a	a
IWB50897	b	b	a	b	a	a	a	b	a	b	b	b	b	a	b	b	b	b	b	b	a	b	a	a	b	a	a	a	b	b	b	a	a	a	b	b	b	b	b	b	b	a	a	a	b	b	b	b	a
IWB13915	a	a	a	a	a	a	a	a	b	a	a	a	a	a	a	a	b	b	a	b	a	a	a	a	a	a	a	b	a	a	a	a	a	a	a	b	b	a	b	b	b	b	a	b	b	b	b	a	a
IWA6250	b	b	b	a	a	b	b	a	a	b	a	b	a	b	a	a	a	a	a	b	b	a	b	a	b	b	a	b	a	a	b	b	b	b	b	b	b	b	b	b	b	b	b	b	b	b	b	a	b
IWB51504	a	a	a	a	a	a	a	b	a	a	a	a	a	a	b	a	a	a	a	a	a	a	a	a	a	b	a	a	a	a	b	a	a	a	a	a	a	a	a	a	a	a	b	a	a	a	a	b	a
IWB836	b	b	b	b	b	a	a	b	b	a	a	b	b	b	b	b	b	b	b	b	b	b	b	b	b	b	a	b	b	b	b	b	b	b	a	a	b	b	b	b	b	b	b	b	b	b	b	a	b
IWA3080	b	b	a	a	a	a	a	a	a	a	a	a	a	a	a	a	a	a	a	a	a	a	a	a	a	a	a	a	a	a	a	a	a	a	a	a	a	a	b	b	b	a	a	a	b	a	a	a	a
IWB5787	b	b	b	a	a	a	a	a	b	b	a	b	b	a	b	a	a	a	a	b	b	b	a	b	a	b	b	b	a	b	b	b	b	b	b	b	a	b	b	b	b	b	b	b	b	b	b	b	b
IWB54724	a	a	a	b	b	a	a	a	a	b	b	a	a	b	a	b	a	a	b	a	a	b	a	a	a	a	b	a	b	a	a	a	a	a	b	a	a	a	a	a	a	a	a	a	a	a	a	a	a
IWB35580	b	b	b	b	b	b	b	b	a	b	b	b	b	b	b	b	b	b	b	a	a	b	b	b	b	b	b	a	b	b	b	b	b	b	b	a	a	b	a	a	a	b	b	a	a	a	a	b	b
IWB1769	-	b	a	a	a	a	a	a	b	a	a	b	a	a	a	a	a	a	a	a	a	b	a	b	b	a	b	b	a	a	a	a	a	a	b	a	a	b	b	b	b	b	a	b	b	b	b	a	a
IWB48199	b	b	a	a	b	b	b	b	b	b	a	b	b	a	b	b	b	b	a	b	b	a	b	b	b	b	a	b	b	b	b	b	b	b	b	a	a	a	b	b	b	b	a	b	b	b	b	b	b
IWA6564	b	a	b	a	a	b	b	a	b	b	a	b	a	a	a	a	b	b	a	a	a	a	a	b	a	a	a	a	a	a	b	b	b	b	b	a	a	a	a	a	a	a	b	a	a	a	a	b	a
IWB56904	a	a	a	a	a	a	a	a	a	a	a	a	a	a	a	a	a	a	a	b	a	a	a	a	a	a	a	a	a	a	a	a	a	a	a	a	a	a	a	a	a	a	a	a	a	a	a	a	a
IWA2231	-	b	b	b	b	b	b	b	b	b	b	b	a	b	b	b	b	b	b	b	b	a	b	b	b	b	b	b	b	b	b	b	b	b	b	b	b	b	b	b	b	b	b	b	b	b	b	b	a
IWB2315	b	b	a	b	b	b	b	b	b	a	a	a	b	a	a	b	b	b	b	b	b	b	b	a	a	b	b	b	b	b	b	a	b	b	b	b	b	b	b	b	b	b	a	b	b	b	b	b	b
IWB39756	b	b	b	b	b	b	b	b	b	b	b	a	a	b	b	b	b	b	b	b	b	b	b	b	b	b	b	a	b	-	b	b	b	b	b	b	a	b	b	b	b	b	b	b	b	b	b	b	b
IWB11090	b	b	b	a	a	b	b	b	b	b	b	a	b	a	b	b	b	b	b	b	b	b	b	b	b	b	b	b	a	b	b	b	b	b	b	a	a	b	b	b	b	b	b	b	b	b	b	b	b
IWB60831	b	b	a	b	a	a	a	a	a	a	a	a	a	a	a	b	b	b	a	b	a	a	a	a	a	a	a	b	a	b	a	a	a	a	a	b	a	b	a	a	a	a	b	a	a	a	a	b	a
IWB26247	b	b	a	a	b	b	b	a	a	b	a	a	a	b	a	a	a	a	b	a	b	a	a	a	a	a	b	a	a	a	a	b	b	b	b	a	b	a	a	a	a	a	a	a	a	a	a	a	b
IWB61745	b	b	b	b	b	b	b	b	b	a	b	b	b	b	b	b	b	b	b	b	b	b	b	a	b	b	b	b	b	b	b	b	b	b	b	b	a	b	b	b	b	b	a	b	b	b	b	a	b
IWB44900	b	a	b	a	a	a	a	a	a	a	a	b	a	b	a	a	a	a	a	a	a	a	a	a	a	b	a	a	a	b	a	b	b	b	a	a	a	a	a	a	a	a	a	a	a	a	a	a	a
IWB26011	a	a	a	a	a	a	a	a	a	b	b	b	a	a	a	a	a	a	a	a	a	a	a	a	a	a	b	b	a	a	a	b	b	b	b	a	a	a	b	b	b	b	a	b	b	b	a	a	a
IWB54962	b	a	a	a	a	a	a	a	a	a	a	a	a	a	a	a	a	a	a	a	a	a	a	a	a	a	a	a	a	a	a	a	a	a	a	a	a	a	a	a	a	a	a	a	a	a	a	a	a
IWB65881	b	b	b	b	b	b	b	a	a	b	b	b	b	b	b	b	b	b	b	b	b	b	b	b	b	a	b	b	b	b	a	b	a	a	b	b	a	b	b	b	b	b	b	b	b	b	b	-	b
IWB56801	b	a	b	b	b	b	b	b	a	b	b	b	b	b	b	b	b	b	b	b	b	b	b	a	a	b	b	b	b	a	b	a	a	a	b	b	b	b	b	b	b	b	b	b	b	b	b	a	b
IWB48388	-	a	a	b	a	a	a	a	a	a	b	b	b	b	a	a	a	a	b	b	b	b	a	a	a	a	b	b	b	a	b	b	b	b	a	b	b	b	a	b	b	b	b	b	b	b	a	b	a
IWB4966	a	a	a	b	b	b	b	a	a	b	a	b	a	a	a	b	b	b	b	a	a	a	a	b	a	b	b	a	a	b	a	b	b	b	a	a	a	a	a	a	a	a	a	a	a	a	a	b	a
IWB6175	a	a	b	b	b	a	a	a	a	a	a	a	a	a	a	b	b	b	a	a	a	a	a	b	a	b	b	a	a	b	a	b	b	b	a	a	a	a	a	a	a	a	a	a	a	a	a	b	b
IWB61884	b	b	a	a	a	a	a	a	a	a	a	a	a	a	a	a	a	a	a	b	a	b	a	b	a	b	b	b	a	a	b	a	a	a	b	b	b	b	b	b	b	b	b	b	b	b	b	b	b
IWA8041	b	b	a	b	b	a	a	b	b	a	a	a	a	b	a	b	b	b	a	a	a	a	a	b	b	b	b	b	b	b	a	b	b	b	b	a	a	a	a	a	a	a	a	a	a	a	a	b	a
IWB23494	b	b	a	b	b	b	b	a	a	b	-	a	a	b	a	b	b	b	b	a	a	a	a	b	a	a	a	a	b	b	a	a	a	a	a	a	a	a	a	a	a	b	b	a	b	a	b	a	a
IWB11359	b	a	b	a	a	b	b	b	a	a	a	b	a	a	a	a	a	a	a	b	a	a	a	b	a	a	b	a	a	a	a	a	a	a	a	-	a	a	a	a	a	a	a	a	a	a	a	a	a
IWB45886	b	b	b	b	a	a	a	a	b	b	a	b	a	b	a	b	a	a	b	b	a	a	a	a	a	b	b	b	b	a	b	b	b	a	a	a	b	a	b	a	a	a	a	b	a	a	a	b	a
IWB35139	a	b	b	b	b	a	a	a	a	a	a	a	a	b	a	b	b	b	b	a	a	b	a	a	b	a	b	a	b	a	a	a	a	a	b	a	a	a	a	a	a	a	b	b	a	b	b	a	b
IWB44443	b	a	a	a	b	a	a	b	a	a	a	a	b	b	b	b	a	a	a	b	b	a	b	b	a	b	b	b	b	a	a	b	b	b	a	b	b	a	b	b	b	b	a	b	b	b	b	a	b
IWA5641	a	b	b	a	b	a	a	a	a	a	a	b	b	a	a	b	a	a	a	a	b	b	a	a	a	a	a	a	b	a	a	b	a	a	b	b	a	b	b	b	b	b	b	b	b	b	b	b	a
IWB40479	b	a	a	b	b	b	b	a	a	a	a	a	a	b	a	b	b	b	b	b	b	b	a	a	a	b	b	b	a	a	a	a	a	a	b	a	a	a	b	b	b	b	a	b	b	b	b	a	a
IWA2800	b	b	b	b	b	b	b	b	b	b	b	b	b	a	b	b	b	b	b	a	b	b	b	a	b	b	b	a	a	b	a	b	b	b	b	a	b	b	b	a	a	a	b	a	a	a	a	b	b
IWB67819	b	b	b	a	a	a	a	b	b	b	b	a	b	b	b	b	b	b	a	a	b	b	a	b	b	b	b	b	b	b	a	b	b	b	b	b	b	b	a	b	b	a	b	a	b	a	b	a	b
IWB63540	b	a	a	b	b	b	b	b	b	b	b	a	a	a	b	b	b	b	b	b	b	a	b	a	b	b	b	b	b	a	b	b	b	b	a	b	b	b	b	b	b	b	b	b	b	b	b	b	b
IWA7512	a	a	b	b	b	a	a	b	b	a	b	b	a	a	a	b	b	b	b	b	b	b	a	a	a	a	a	b	b	a	a	b	b	b	b	b	a	b	a	a	a	b	b	b	a	b	a	b	b
IWB35125	-	a	a	a	b	a	a	b	a	a	a	a	a	a	a	b	a	a	a	b	a	a	b	a	a	a	a	a	a	a	a	a	a	a	a	b	a	a	a	a	a	a	a	a	a	a	a	a	b
IWB21475	b	a	b	a	a	a	a	a	a	a	b	b	b	b	b	a	a	a	a	b	a	a	b	a	b	a	a	b	a	b	b	a	b	b	a	a	b	a	a	a	a	a	b	a	a	a	a	a	b
IWB58617	b	a	b	a	a	a	a	a	b	a	a	b	b	b	b	a	a	a	b	b	b	b	b	b	b	b	a	b	b	b	b	b	b	b	a	b	b	b	a	a	a	a	a	a	a	a	a	b	b
IWB49924	b	a	a	a	b	b	b	b	a	a	b	b	a	b	a	b	b	b	a	b	b	a	a	a	a	b	a	b	b	b	b	a	a	a	a	b	a	b	b	b	b	b	b	b	b	b	b	a	b
IWA6877	b	b	b	b	b	b	b	a	b	a	a	b	b	b	b	b	b	b	b	b	b	b	a	b	b	b	b	b	a	b	a	b	b	b	b	b	b	b	b	b	b	b	b	b	b	b	b	b	b
IWB4981	a	a	a	a	b	b	b	b	b	a	a	b	b	b	b	a	a	a	b	a	b	b	a	b	b	b	b	b	b	b	a	b	b	b	b	a	a	a	a	a	a	a	b	a	a	a	a	b	b
IWB70301	b	b	b	b	b	b	b	a	b	b	b	b	b	b	b	b	b	b	b	b	a	b	b	b	a	b	b	b	a	a	a	b	b	b	b	b	b	a	a	b	b	b	b	b	a	b	a	b	b
IWB35908	b	a	a	a	a	b	b	b	a	a	a	b	b	a	a	a	a	a	a	a	a	a	a	a	b	b	a	a	a	b	a	a	a	a	b	a	b	a	a	a	a	a	a	a	a	a	a	a	a
IWA3504	a	b	a	b	b	a	a	b	b	b	b	a	a	a	b	b	b	b	b	a	a	b	a	a	a	b	a	a	a	a	a	b	b	b	a	a	a	a	a	a	a	a	a	a	a	a	a	b	b
IWA1703	b	b	b	b	b	a	a	a	b	a	b	b	b	a	b	b	b	b	b	a	b	b	b	b	a	b	a	a	b	b	a	b	b	b	b	a	b	b	a	a	a	a	b	a	a	a	a	b	b
IWB62072	a	b	a	a	a	a	a	b	a	a	a	a	a	a	b	a	a	a	a	a	a	b	a	b	a	a	b	b	b	a	a	a	a	a	a	a	a	b	b	b	b	b	a	a	a	a	b	b	a
IWB8186	a	a	b	a	a	a	a	a	a	a	a	b	a	b	a	a	a	a	a	b	a	a	a	b	a	a	a	b	b	a	b	b	b	b	a	b	a	a	a	b	b	b	b	b	b	b	b	a	a
IWA537	a	b	a	b	b	a	a	a	b	b	b	a	a	b	b	b	b	b	b	b	a	b	a	b	a	a	a	b	a	a	b	a	a	a	a	a	a	b	a	b	b	b	b	b	b	b	b	b	b
IWB1876	b	a	b	b	a	a	a	a	b	a	a	a	a	b	b	a	b	b	a	b	b	a	b	a	b	b	b	b	b	a	a	b	a	a	a	a	a	b	b	b	b	b	b	b	b	b	b	a	a
IWA5351	b	b	a	a	a	a	a	b	a	a	a	a	b	a	a	a	a	a	a	b	b	a	a	b	b	b	b	b	b	-	b	a	a	a	b	a	a	b	b	b	b	b	b	b	b	b	b	a	a
IWA7064	b	a	b	b	b	b	b	a	a	a	a	b	a	b	b	b	b	b	b	b	b	a	a	b	b	b	b	b	a	b	a	a	a	a	a	a	b	b	b	b	b	b	b	b	b	b	b	a	a
IWA610	b	a	a	a	a	a	a	b	a	a	a	a	b	a	a	a	a	a	a	a	a	a	b	a	a	b	a	a	a	b	a	a	a	a	a	a	a	a	a	a	a	a	a	a	a	a	a	a	a
IWB62162	b	a	b	a	a	a	a	b	a	a	a	b	b	b	b	a	a	a	a	a	b	a	b	b	b	b	b	a	a	b	a	b	b	b	a	b	a	a	b	a	a	a	b	a	a	a	b	a	a
IWB14528	b	a	b	b	b	b	b	b	a	b	b	b	b	b	b	b	b	b	b	b	a	a	b	a	b	b	a	b	a	b	b	a	b	b	a	a	b	a	b	b	b	b	b	b	b	b	b	a	b
IWB55784	a	a	b	a	b	b	b	b	b	a	a	b	b	b	b	a	a	a	b	a	b	b	a	b	b	b	a	a	b	b	a	b	b	b	a	b	a	b	a	a	a	a	b	a	a	a	a	b	a
IWB8306	b	a	a	a	a	a	a	b	b	a	a	b	b	a	a	a	a	a	a	a	a	b	b	a	a	b	b	a	a	b	a	b	b	b	b	a	b	b	b	b	b	b	-	b	b	a	b	a	a
IWB29935	b	a	b	b	b	b	b	b	b	b	b	b	b	b	b	b	b	b	b	b	b	a	a	b	-	b	b	b	b	b	b	b	b	b	a	b	a	a	b	b	b	b	b	b	b	b	b	b	b
IWB11375	b	b	b	b	b	b	b	b	b	b	b	b	b	b	b	b	b	b	b	b	b	b	b	b	a	a	b	b	b	b	a	a	a	a	b	b	b	a	b	a	b	b	a	b	b	b	b	b	a
IWB72077	-	b	b	b	b	b	b	b	b	b	b	b	b	b	b	b	b	b	b	b	b	b	b	b	b	b	b	b	b	b	b	b	b	b	b	b	b	b	b	b	b	b	b	b	b	b	b	b	b
IWB11838	b	b	b	b	b	b	b	b	b	b	b	b	b	b	b	b	b	b	b	b	b	b	b	a	b	b	a	b	b	b	b	a	a	a	b	b	a	b	b	b	b	b	b	b	b	b	b	b	b
IWB10310	a	b	b	b	b	b	b	b	b	a	a	b	b	b	b	b	b	b	b	b	b	b	b	b	b	b	b	b	b	b	b	a	a	a	b	b	a	b	b	b	b	b	b	b	b	b	b	b	a
IWA1756	b	b	b	b	a	a	a	b	a	a	a	b	b	a	b	b	b	b	b	b	b	b	b	a	b	b	b	b	b	b	b	a	a	a	b	b	a	b	b	b	b	b	b	b	b	b	b	b	a
IWB39674	b	b	b	b	b	b	b	b	b	b	b	b	b	b	b	b	b	b	b	b	b	b	b	b	b	b	b	b	b	b	b	b	b	b	b	b	b	b	b	b	b	b	b	b	b	b	b	b	b
IWB63275	b	b	b	b	b	b	b	b	b	b	b	b	b	b	b	b	b	b	b	b	b	b	b	b	b	b	b	b	b	b	b	b	b	b	b	b	b	b	b	b	b	b	b	b	b	b	b	b	b
IWB38826	b	b	b	a	a	b	b	a	a	a	a	b	b	b	b	a	a	a	a	a	b	b	a	b	b	b	b	b	b	b	b	b	b	b	b	a	b	b	b	b	b	a	b	a	b	b	b	b	b
IWB45132	a	a	a	a	a	a	a	a	a	a	a	a	a	b	a	a	a	a	a	a	a	a	a	b	b	b	a	a	a	a	a	a	a	a	a	a	a	a	a	a	a	a	a	a	a	a	a	a	a
IWB28522	a	b	b	b	a	a	a	b	b	a	a	b	b	a	a	b	b	b	b	a	a	b	b	b	a	b	b	a	a	b	a	a	a	a	b	b	a	a	a	a	a	a	a	a	a	a	a	b	a
IWB18421	b	b	b	a	a	a	a	a	a	a	a	b	a	b	a	a	a	a	a	a	a	a	a	b	b	a	a	a	a	b	a	b	b	b	a	a	a	a	a	a	a	a	a	a	a	a	a	a	a
IWB47200	b	b	b	a	a	a	a	b	b	b	a	a	b	a	b	a	a	a	a	a	a	b	a	a	a	a	a	a	a	a	b	b	b	b	b	b	a	a	a	a	b	b	a	a	a	a	b	b	a
IWB5608	b	a	a	a	a	a	a	a	a	a	a	a	a	a	a	a	a	a	a	b	a	a	a	a	a	a	a	a	a	a	a	a	a	a	a	a	a	a	b	b	b	b	a	b	a	a	b	a	a
IWB45641	b	a	a	a	a	a	a	a	a	a	a	a	b	a	a	a	a	a	a	b	a	a	a	a	a	b	a	b	a	a	a	b	b	b	b	b	a	b	a	a	a	a	a	a	a	a	a	a	b
IWA7058	b	b	b	b	b	b	b	b	b	b	b	a	a	a	a	b	a	a	b	b	b	a	a	b	a	a	a	a	a	b	a	b	b	b	b	a	b	b	a	a	a	a	a	a	a	b	a	b	a
IWB74688	-	b	b	b	b	b	b	a	b	b	b	b	b	b	b	b	b	b	b	a	b	b	a	b	b	a	a	a	b	a	b	b	a	b	a	b	b	a	a	b	b	b	b	a	a	b	b	b	a
IWA7632	b	b	b	b	a	b	b	a	a	a	b	a	a	b	b	a	a	a	b	b	b	b	a	a	b	b	a	b	a	a	a	b	b	b	a	a	a	a	b	b	b	a	a	a	b	a	b	b	b
IWB21402	b	a	b	a	a	a	b	a	a	a	b	a	b	a	a	a	a	a	a	b	a	a	a	a	a	a	b	b	a	a	a	a	a	a	a	a	a	a	b	b	b	b	a	b	b	a	b	a	a
IWB66679	a	b	b	b	b	b	b	b	b	b	b	b	b	b	b	b	b	b	b	b	a	b	b	b	b	b	b	b	b	b	b	b	b	b	b	b	b	b	b	b	b	b	b	b	b	b	b	b	b
IWB72801	b	a	b	b	b	b	b	b	b	b	b	a	b	a	b	b	b	b	b	b	b	a	b	a	b	a	b	b	b	b	b	a	a	a	b	b	b	b	b	b	b	b	b	b	b	b	a	b	a
IWB11897	b	a	a	a	a	a	a	b	b	b	a	b	b	b	a	b	a	a	b	b	b	b	b	b	b	b	b	b	b	a	b	a	a	a	b	a	a	b	b	b	b	b	b	b	b	b	b	a	b
IWB43375	b	a	b	b	b	a	a	b	b	a	b	a	b	b	b	b	b	b	b	b	a	a	b	b	b	b	b	a	b	a	a	a	a	a	a	a	b	a	a	a	a	a	b	a	a	a	a	b	b
IWB19938	b	a	a	a	a	b	b	a	a	b	b	b	a	a	a	a	a	a	a	b	b	b	a	a	a	b	a	a	b	a	b	a	a	a	b	a	a	a	a	a	a	a	a	a	a	b	b	b	b
IWB11076	b	b	b	a	a	b	b	a	a	b	a	b	b	b	b	a	a	a	a	b	b	b	b	b	b	b	b	b	b	b	b	b	b	b	b	b	a	b	b	b	b	b	b	b	b	b	b	-	b
IWB10640	b	a	a	b	b	b	b	b	a	b	a	b	b	b	a	b	b	b	b	-	a	a	b	b	b	b	b	b	b	a	a	b	b	b	b	b	b	b	b	b	b	b	b	a	a	b	b	a	a
IWB8050	b	b	b	b	a	a	a	b	a	b	a	b	b	a	b	b	a	a	a	a	b	b	b	a	b	b	b	b	a	b	b	a	a	a	b	b	b	b	b	b	b	b	a	b	b	b	b	a	b
IWB34629	a	b	a	a	b	a	a	a	a	a	a	b	b	a	a	a	a	a	a	a	a	b	b	b	a	a	b	a	a	b	b	a	a	a	a	a	b	a	a	a	a	b	a	a	a	a	a	a	b
IWA3654	-	b	b	b	b	b	b	b	b	b	b	b	b	a	b	b	b	b	b	b	b	b	b	b	b	b	b	b	b	b	b	b	b	b	b	b	b	b	b	b	b	b	b	b	b	b	b	a	b
IWB6937	a	a	a	b	b	b	b	b	a	b	b	a	a	b	b	b	b	b	b	b	a	a	b	b	a	a	a	b	b	b	b	a	a	a	b	b	a	b	b	a	a	a	b	a	a	a	a	b	b
IWB51435	a	a	b	b	b	b	b	b	b	b	b	b	a	b	b	b	b	b	b	b	b	b	a	b	b	a	b	b	b	b	a	a	b	b	b	a	b	a	b	b	b	b	b	b	b	b	a	b	a
IWB3922	b	b	b	b	a	b	b	a	a	a	b	a	a	a	b	a	a	a	b	a	a	a	a	a	a	a	b	a	a	b	a	b	b	b	a	a	a	a	a	a	a	a	b	a	a	b	a	b	b
IWB31407	a	b	a	a	a	a	a	b	a	a	a	a	a	a	a	a	a	a	a	a	a	a	a	b	b	a	a	a	a	b	b	a	a	a	a	a	a	a	a	a	a	a	a	a	a	a	a	a	a
IWB31039	b	b	b	b	b	b	b	b	b	b	b	b	b	b	b	b	b	b	b	a	b	a	b	b	b	b	b	b	b	a	a	b	b	b	b	b	b	a	b	b	a	b	b	a	b	b	a	b	a
IWB71883	-	b	b	a	b	b	b	b	b	a	b	b	a	b	b	b	b	b	a	b	b	b	b	b	b	b	b	b	b	b	b	b	b	b	b	b	a	b	b	b	b	b	b	b	b	b	b	b	b
IWB43650	b	a	a	a	a	a	a	a	a	a	a	a	a	a	a	a	a	a	a	a	a	a	a	a	a	a	a	a	a	a	b	a	a	a	a	a	a	a	a	a	a	a	a	b	b	b	a	a	a
IWB69720	b	b	b	b	b	b	b	b	b	b	b	b	b	b	b	b	b	b	b	b	b	a	b	b	b	b	b	b	b	b	b	b	b	b	a	b	b	a	b	b	b	b	b	b	b	b	b	b	b
IWB306	-	a	b	a	a	a	a	a	a	a	a	a	a	a	a	a	a	a	a	a	a	a	a	a	a	a	a	a	a	a	b	a	a	a	a	a	b	a	a	a	a	a	a	a	a	a	a	a	a
IWA5335	b	b	b	b	b	b	b	b	b	b	b	b	b	b	b	b	b	b	b	a	a	b	b	b	b	b	b	a	a	a	b	b	b	b	a	b	b	a	a	a	a	a	a	a	a	a	a	b	b
IWB57491	b	a	a	b	a	b	a	b	a	b	a	a	a	a	a	b	b	b	b	b	a	a	a	a	a	a	b	b	b	a	b	b	a	a	b	b	a	a	b	b	b	b	a	b	b	a	b	a	a
IWB59450	a	b	b	b	b	b	b	a	b	b	b	a	b	a	b	b	b	b	b	b	b	a	b	b	b	b	b	b	b	b	b	a	b	b	b	b	b	b	b	b	b	b	b	b	b	b	b	b	b
IWA7271	b	a	a	b	b	b	b	b	b	a	a	b	a	a	a	b	b	b	b	b	b	b	a	a	a	a	a	b	a	b	a	b	b	b	b	a	b	b	b	b	b	b	b	b	b	b	b	a	a
IWB65670	b	b	b	b	b	b	b	b	b	b	b	a	a	a	b	b	b	b	b	b	b	a	b	a	b	b	a	b	b	b	b	b	b	b	b	a	a	b	b	b	b	b	b	b	b	b	b	b	a
IWA1824	a	b	b	a	a	a	a	a	a	b	b	a	b	b	b	a	a	a	a	a	a	a	b	b	b	b	b	a	b	a	b	a	a	a	a	b	a	a	a	a	a	a	a	a	a	a	a	b	b
IWB7672	b	a	a	a	a	a	a	a	a	b	b	a	b	a	a	a	a	a	a	b	a	b	b	b	b	a	a	b	a	a	a	a	a	a	a	a	a	a	b	b	b	b	a	b	b	b	b	a	a
IWB59634	a	a	a	b	b	a	a	b	a	a	a	a	a	a	b	b	a	a	b	a	b	a	a	a	a	a	a	a	a	a	b	a	a	a	a	b	b	a	a	a	a	b	a	a	a	b	a	b	a
IWB66052	a	a	a	b	a	b	a	b	a	a	a	a	a	a	a	a	b	b	b	a	a	a	b	a	a	a	a	a	a	a	b	a	b	b	a	a	a	a	a	a	a	b	a	a	a	b	a	a	b
IWB53023	b	a	a	a	a	b	b	b	a	b	b	a	a	a	a	a	b	b	a	a	a	b	b	b	b	a	a	a	a	a	a	b	b	b	a	a	a	b	a	a	a	a	a	a	b	a	a	a	b
IWB74046	b	a	a	a	a	a	a	a	a	a	b	a	a	a	a	a	a	a	a	a	a	a	a	a	a	b	a	a	a	a	a	b	b	b	a	a	a	a	a	a	a	a	a	a	a	a	a	a	b
IWB7488	b	b	b	b	b	a	a	b	b	b	a	b	a	a	b	b	b	b	b	b	a	b	a	a	a	b	b	b	b	b	b	b	b	b	b	a	b	a	a	a	a	b	b	a	a	a	a	b	b
IWB61923	b	b	b	a	a	a	a	b	b	b	a	a	b	a	b	a	a	a	a	a	a	b	a	a	a	a	a	b	a	a	b	b	b	b	b	b	a	a	a	b	b	b	a	a	b	a	b	b	a
IWB62177	b	a	a	a	a	a	a	a	a	b	b	a	a	a	a	a	a	a	a	b	b	a	a	b	a	a	a	b	a	b	a	a	a	a	a	a	b	b	b	b	b	b	a	b	b	b	b	a	a
IWB9612	a	b	a	b	b	a	a	a	a	a	a	b	a	a	a	a	b	b	a	a	b	a	a	a	b	b	a	b	a	b	a	a	a	a	b	b	b	a	a	b	b	b	a	b	b	a	b	a	a
IWB56720	b	a	a	b	b	b	b	a	a	b	a	a	a	a	b	a	b	b	b	a	a	a	a	a	a	b	a	b	a	b	a	b	b	b	a	a	b	b	a	a	a	a	b	a	a	a	a	b	a
IWB8704	b	b	b	b	b	b	b	b	b	b	b	b	b	a	b	b	b	b	b	b	b	b	a	a	b	b	b	b	a	b	b	b	b	b	b	b	b	a	b	b	b	b	b	b	b	b	b	b	b
IWB35031	b	b	b	b	b	b	b	b	b	b	b	b	a	b	a	b	b	b	b	b	b	a	a	b	b	a	b	b	b	b	a	a	a	a	b	b	b	a	b	b	b	b	b	b	b	b	b	a	a
IWB71672	b	a	b	a	b	b	b	b	b	b	b	b	b	b	b	a	b	b	b	b	b	a	b	b	a	a	a	b	a	b	b	a	a	a	a	a	a	a	a	b	b	b	a	a	a	b	a	a	b
IWB22536	b	a	b	a	a	a	a	b	b	a	a	b	b	b	b	b	a	a	b	a	a	b	b	b	a	a	a	a	a	b	b	b	b	b	a	a	-	b	b	a	-	a	b	a	b	b	a	b	b
IWB69394	a	b	b	a	a	a	a	a	b	b	b	b	b	b	b	a	a	a	a	b	b	a	b	a	b	b	a	b	a	b	a	a	a	a	b	a	b	b	b	b	b	b	a	b	b	b	b	a	a
IWB54141	b	a	b	a	a	a	a	b	b	a	a	a	a	a	b	b	a	a	b	a	b	a	a	a	a	a	b	a	a	a	a	b	b	b	a	a	a	b	a	a	a	b	a	a	a	b	b	a	a
IWA4526	a	a	a	b	b	b	a	a	a	a	a	b	b	b	a	b	b	b	b	b	b	b	a	a	a	a	a	b	a	b	a	a	a	a	a	a	a	a	b	a	a	b	a	b	b	b	b	a	a
IWA7872	a	b	a	a	a	a	b	b	b	b	a	b	b	a	a	b	a	a	b	b	b	b	a	a	b	b	b	b	b	a	b	b	b	b	b	a	a	a	b	b	b	b	b	b	b	b	b	b	b
IWB36459	a	b	a	a	a	b	b	b	b	a	b	a	a	a	a	a	-	a	a	a	a	a	a	b	b	a	a	a	a	a	a	a	a	a	b	a	b	a	a	a	a	a	a	a	a	a	a	a	b
IWB34854	b	a	a	b	a	b	b	b	a	b	b	b	b	b	a	a	b	b	b	a	a	a	b	a	a	a	a	a	a	b	b	a	b	b	a	a	a	a	a	b	b	b	a	a	a	b	a	a	b
IWA5623	b	b	b	a	a	b	b	a	a	a	b	a	a	a	b	a	a	a	a	b	b	a	b	a	a	b	b	a	a	a	a	b	b	b	b	a	b	a	a	a	a	a	b	a	a	a	a	b	b
IWB30519	a	a	b	a	b	b	b	b	a	a	b	b	a	b	b	a	a	a	a	b	a	a	a	a	a	b	b	a	b	b	a	a	a	a	a	a	a	b	a	a	a	a	b	a	a	a	a	b	a
IWB29456	a	b	a	a	b	a	a	a	b	a	a	a	b	b	a	a	b	b	b	a	a	b	b	b	a	a	a	a	a	b	a	a	a	a	b	a	b	b	a	a	a	a	a	a	a	a	a	a	a
IWB59686	a	b	a	b	a	b	b	a	b	b	b	b	b	a	a	b	a	a	a	a	b	b	b	b	b	b	b	a	a	b	b	b	b	b	b	b	b	b	a	a	a	a	b	a	a	a	a	a	a
IWB64098	a	b	a	a	a	a	a	a	a	a	a	b	a	a	a	a	a	a	a	a	a	a	a	a	a	a	b	a	a	a	a	b	b	b	b	a	a	a	a	a	a	a	b	a	a	a	a	b	b
IWB71983	b	a	a	a	a	a	a	a	a	a	a	a	b	a	a	a	a	a	a	a	a	b	a	a	a	a	a	b	a	a	a	a	a	-	a	a	a	b	b	b	b	b	a	b	b	b	b	a	a
IWB10635	a	b	b	a	a	b	b	b	b	b	b	a	b	b	a	b	a	a	a	b	b	a	a	a	b	b	b	a	b	b	a	b	b	b	b	b	b	b	b	b	b	b	a	b	b	b	b	a	b
IWB66311	b	b	b	b	b	b	b	b	a	b	a	b	a	b	b	b	b	b	b	b	b	b	a	a	a	a	b	b	b	b	b	b	b	b	b	b	a	b	b	b	b	b	a	b	b	b	b	b	b
IWA5735	a	b	a	b	b	b	b	a	a	b	b	b	a	a	b	b	a	a	b	b	b	a	a	a	a	b	b	b	b	b	b	a	a	a	b	b	b	a	b	a	a	b	a	b	a	b	b	a	a
IWB30840	b	b	b	b	b	b	b	b	b	a	b	b	b	b	b	a	b	b	b	b	b	b	b	b	b	b	b	a	b	b	b	b	b	b	b	a	b	b	b	b	b	b	b	b	b	b	b	b	b
IWB2242	b	b	b	b	a	a	b	b	b	b	b	a	a	a	b	b	a	a	a	a	b	a	b	b	b	b	b	a	b	a	b	b	b	b	b	b	b	b	b	b	b	b	b	b	b	b	b	b	b
IWB7105	b	a	a	a	a	a	a	a	b	a	a	a	a	a	a	a	a	a	a	b	b	a	a	a	a	a	a	a	a	a	a	a	a	a	a	a	a	a	b	b	b	b	a	b	b	b	b	a	a
IWB75167	b	a	b	b	b	a	a	a	a	a	a	a	b	b	b	a	b	b	b	b	a	b	b	a	a	b	b	a	b	b	b	b	b	b	a	a	a	b	b	b	b	b	b	b	b	b	b	b	b
IWA2306	b	b	b	b	b	b	b	b	b	b	b	b	b	b	b	b	b	b	b	b	b	b	b	b	b	b	b	a	b	b	b	a	a	a	b	b	b	b	b	b	b	b	a	b	b	b	b	a	b
IWB46556	b	b	b	b	b	b	b	a	b	a	a	b	b	b	b	b	b	b	b	b	b	b	b	b	b	b	b	b	b	b	b	b	b	b	b	b	b	b	b	b	b	b	b	b	b	b	b	b	b
IWA5532	b	a	a	b	b	a	a	a	b	a	a	b	a	b	b	b	b	b	b	b	b	b	a	b	a	b	b	b	b	a	b	a	a	a	b	b	b	b	b	b	b	b	b	b	b	b	b	b	b
IWB65869	a	a	a	a	a	a	a	a	a	a	a	a	b	a	a	a	a	a	a	a	b	a	b	a	b	a	a	a	a	a	a	a	a	a	a	a	a	a	a	a	a	b	a	b	a	a	b	a	a
IWB41848	a	a	a	a	a	a	a	a	a	a	a	a	a	a	a	a	a	a	a	a	a	a	b	a	a	a	a	a	a	a	b	a	a	a	a	a	b	a	a	a	a	a	a	a	a	a	a	a	a
IWA6947	a	b	a	b	b	a	a	b	a	a	a	b	a	a	b	b	a	a	a	a	a	a	b	b	b	b	a	a	a	a	a	b	b	b	b	b	b	a	b	b	b	b	b	b	b	b	b	a	b
IWB27325	b	b	b	a	a	b	b	b	b	b	b	b	b	b	b	b	b	b	a	b	b	b	b	b	b	b	b	b	a	b	b	b	b	b	b	b	b	b	b	b	b	b	b	b	b	b	b	b	b
IWB10313	b	b	b	b	a	a	a	a	b	a	a	b	b	b	b	a	b	b	a	b	b	b	b	a	b	b	b	b	b	a	b	b	b	b	b	b	b	b	b	b	b	b	b	b	b	b	b	a	b
IWA3334	b	a	b	a	a	a	a	a	b	a	a	b	a	a	b	a	a	a	a	b	a	a	a	b	a	a	a	a	a	b	a	a	b	b	b	a	b	a	b	a	b	a	a	b	b	a	a	a	b
IWB40758	a	b	b	b	b	a	a	b	b	a	a	b	b	a	a	b	b	b	b	a	a	b	b	b	a	b	b	a	b	a	b	a	a	a	b	b	a	b	a	a	a	a	a	a	a	a	a	a	a
IWB6809	a	b	a	a	a	a	a	a	a	a	a	a	a	a	a	a	a	a	a	a	a	a	b	b	b	b	a	b	a	a	a	a	a	a	b	a	b	b	a	a	a	a	a	a	a	a	a	a	b
IWB34688	a	a	a	a	a	a	a	a	a	a	a	a	a	a	a	a	a	a	a	b	b	b	a	b	a	a	a	b	b	a	a	a	a	a	a	a	a	b	a	a	a	b	a	a	a	b	a	a	a
IWB34611	a	a	b	b	b	b	b	b	b	b	b	b	b	b	b	b	b	b	b	b	b	a	b	b	b	b	b	b	b	b	b	b	b	b	a	b	b	a	b	b	b	b	b	b	b	b	b	b	b
IWB47605	b	b	b	b	b	b	b	b	b	b	b	b	b	b	b	b	b	b	b	a	b	b	b	b	b	a	b	b	b	b	b	b	b	b	a	b	a	b	b	b	b	b	b	b	b	b	b	b	b
IWB36037	a	a	a	a	a	a	a	a	a	a	a	a	a	a	b	a	a	a	a	a	b	a	a	a	a	a	a	a	a	a	b	b	b	b	a	b	a	a	a	a	a	a	a	a	a	b	b	b	a
IWB12124	b	a	a	a	a	b	b	a	a	a	a	a	a	b	a	a	a	a	a	a	a	a	a	a	b	b	a	a	b	b	a	b	b	b	a	a	a	a	a	a	a	a	a	a	a	a	a	a	a
IWB20139	b	b	b	b	b	b	b	a	b	a	b	b	b	b	b	b	b	b	b	a	a	b	a	b	b	b	b	a	b	b	b	b	b	b	a	a	b	b	a	b	b	b	b	b	b	b	a	b	b
IWB15877	b	b	b	b	b	b	b	b	b	b	b	b	b	b	b	b	b	b	b	b	b	b	b	b	b	b	b	b	b	b	b	b	b	b	b	b	b	b	b	b	b	b	b	b	b	b	b	b	b
IWB45254	a	a	a	a	a	a	a	a	a	a	a	a	a	b	a	a	a	a	a	b	a	a	b	a	a	a	a	a	a	a	a	a	a	a	a	a	a	a	a	a	a	a	b	a	a	a	a	b	a
IWB71341	b	a	a	a	a	b	b	a	a	a	a	a	a	a	a	b	b	b	b	a	a	a	a	a	a	a	a	a	a	a	a	b	b	b	a	a	a	a	a	a	a	a	a	a	a	a	a	a	a
IWB74644	a	a	b	a	a	a	a	a	a	a	a	a	b	b	a	a	a	a	a	a	b	a	a	a	b	a	a	a	b	b	a	b	b	b	a	a	a	a	b	b	b	b	b	b	b	a	b	b	a
IWB33703	b	a	a	a	a	a	a	a	a	b	b	a	a	a	a	a	a	a	a	b	a	a	b	a	a	b	b	b	a	a	a	a	a	a	a	b	b	a	b	b	b	b	b	b	b	b	b	a	b
IWB58584	b	b	b	b	b	a	a	a	a	b	b	a	a	b	a	b	b	b	b	b	b	a	b	b	b	b	b	b	b	b	b	b	b	b	a	b	a	a	b	b	b	b	a	b	b	b	b	b	b
IWB63696	b	b	b	b	b	b	b	b	b	b	b	b	b	b	b	b	b	b	b	b	b	b	a	b	b	b	a	b	b	a	b	b	b	b	b	b	b	b	b	b	b	b	b	b	b	b	b	b	b
IWB33843	a	a	b	a	a	a	a	a	a	a	a	a	a	a	a	a	a	a	a	a	b	a	a	a	a	a	a	b	b	b	a	a	a	a	a	a	a	a	b	b	b	b	a	b	b	b	b	a	a
IWA7663	a	b	a	b	b	b	b	a	a	b	a	b	b	a	a	b	b	b	b	b	b	b	b	b	a	b	b	a	a	b	a	a	a	a	b	b	b	b	a	a	a	b	b	b	b	b	b	b	a
IWB9133	b	b	b	b	b	a	a	b	a	a	b	b	a	b	a	b	b	b	b	b	b	b	a	a	b	b	b	b	b	b	b	a	a	a	b	b	b	b	a	a	a	b	a	b	a	b	b	b	a
IWB33705	a	a	a	a	a	a	a	a	a	-	a	a	b	a	a	a	a	a	a	a	a	a	b	a	a	a	a	a	a	a	a	a	a	a	a	a	a	a	a	a	a	a	a	a	a	a	a	a	a
IWA6938	a	a	a	a	a	a	a	b	a	b	b	a	a	b	a	a	a	a	a	a	b	a	a	a	a	a	b	b	a	a	a	a	a	a	b	b	a	b	b	b	b	b	a	b	b	a	b	a	b
IWA5589	b	b	b	b	b	b	b	a	a	b	b	b	a	b	b	b	b	b	b	b	b	b	a	b	b	-	b	b	b	b	a	b	b	b	b	a	a	a	a	a	a	b	b	a	a	a	b	b	b
IWA6467	a	a	a	a	a	a	a	a	b	a	a	a	a	a	b	a	a	a	a	a	a	a	a	a	b	a	a	a	a	a	a	a	a	a	a	a	a	a	a	b	b	b	a	b	b	a	a	b	a
IWA1523	b	a	b	b	b	a	a	a	a	b	b	a	b	b	b	b	a	a	a	b	b	b	b	b	b	a	b	b	b	b	b	b	a	a	a	a	a	b	b	b	b	b	b	b	b	b	b	b	b
IWB30507	a	a	a	b	b	a	a	b	a	a	a	b	a	a	a	b	a	a	a	a	a	a	a	b	a	b	a	a	a	a	a	a	a	a	b	b	b	a	a	a	a	a	a	a	a	a	a	b	b
IWB45612	b	a	b	a	a	a	a	a	b	a	a	a	a	b	a	a	a	a	a	a	b	a	a	a	a	a	b	b	b	a	b	b	b	b	a	b	a	a	b	b	b	b	a	b	b	a	b	a	a
IWB47313	b	a	a	a	a	a	a	a	a	a	a	a	a	a	a	a	a	a	a	b	b	a	a	a	a	a	a	b	a	a	a	a	a	a	a	a	a	a	a	a	a	b	a	b	b	a	b	a	b
IWB62987	b	a	a	a	a	a	a	a	a	a	a	b	a	a	a	a	a	a	a	a	b	b	a	b	a	a	b	a	a	a	a	a	a	a	a	a	a	a	b	a	a	a	a	a	a	a	b	a	a
IWB49000	b	a	b	a	b	a	a	b	b	b	a	b	a	a	b	b	a	a	b	b	b	b	a	a	a	a	b	b	a	a	b	b	b	b	a	b	b	a	b	b	b	b	a	b	b	b	b	b	b
IWB2613	-	b	b	b	b	b	b	b	b	b	b	b	a	b	b	b	b	b	b	b	b	b	a	b	b	b	b	b	b	b	b	b	b	b	b	b	b	b	b	b	b	b	b	b	b	b	b	b	b
IWA7506	b	a	b	a	b	b	b	b	b	b	a	b	b	a	b	b	a	a	b	b	b	b	b	b	a	b	b	b	a	a	b	b	b	b	a	b	b	a	b	b	b	b	b	b	b	b	b	b	b
IWA3769	b	a	b	b	b	a	a	b	b	b	a	b	b	a	b	b	a	a	b	b	b	b	b	b	a	a	b	b	a	a	b	b	b	b	a	b	b	b	b	b	b	b	b	b	b	b	b	b	b
IWB41978	-	b	b	b	b	a	a	b	b	b	b	b	b	b	b	a	a	a	a	b	b	b	b	b	b	b	b	b	b	b	b	a	a	a	b	b	b	b	b	b	b	b	b	b	b	b	b	b	b
IWB69753	b	a	b	a	a	a	a	b	a	a	b	b	a	b	b	a	a	a	b	b	a	a	a	a	a	a	a	b	a	b	b	a	a	a	a	a	a	a	b	b	b	b	b	b	b	b	b	b	b
IWB51554	b	b	b	b	b	a	a	b	b	b	b	a	a	b	a	b	b	b	b	a	b	b	a	a	b	b	b	b	b	a	a	b	b	b	b	b	a	b	b	a	a	b	a	b	b	a	b	a	a
IWB8719	b	b	b	b	b	b	b	a	b	a	a	b	b	b	b	b	b	b	b	b	b	b	b	b	b	a	a	b	b	b	b	b	b	b	a	a	b	b	b	b	-	b	b	b	b	b	b	a	b
IWB47346	b	a	b	b	a	b	b	b	a	a	a	a	b	b	b	b	b	b	b	a	b	a	b	b	a	b	b	b	a	b	a	b	a	a	b	b	b	b	b	b	b	b	a	b	b	b	b	a	a
IWB41216	a	a	a	a	a	b	b	b	b	a	a	b	b	b	b	a	a	a	a	a	a	b	a	a	a	a	a	a	b	a	b	a	a	a	b	a	b	b	a	a	a	a	b	a	a	a	a	a	a
IWB42809	b	b	a	a	a	a	a	a	a	a	a	b	b	b	b	a	a	a	a	b	b	a	a	b	b	a	b	b	b	a	a	b	b	b	a	b	a	a	b	b	b	b	a	b	b	b	b	b	a
IWB69401	b	b	b	a	b	a	a	a	a	a	b	a	a	a	b	a	a	a	a	b	a	a	a	b	b	b	b	b	a	b	a	a	a	a	b	b	a	b	a	a	a	a	b	a	a	a	a	b	b
IWB38647	a	a	b	a	a	a	a	a	b	a	a	a	b	b	b	a	a	a	a	b	b	a	a	b	b	a	b	b	b	a	a	a	a	a	a	a	a	a	b	b	b	a	b	b	b	a	b	b	b
IWA5523	b	a	a	b	a	b	b	b	a	a	a	a	b	a	a	b	b	b	b	b	b	a	b	a	a	b	b	b	a	a	a	b	b	b	b	b	b	b	a	a	a	b	b	b	a	a	b	b	b
IWB31411	b	a	b	a	a	a	a	b	b	a	b	a	b	b	a	a	a	a	a	a	a	a	a	b	b	a	a	a	b	b	b	a	a	a	a	a	a	a	a	a	a	a	b	a	a	a	a	a	a
IWB27992	b	a	a	a	a	a	a	b	a	a	a	a	b	b	a	a	a	a	a	a	a	b	b	a	a	a	a	a	a	a	a	a	a	a	a	a	b	a	a	a	a	a	a	a	b	a	a	a	a
IWB29016	b	b	a	a	a	b	b	a	b	a	b	b	a	b	a	a	b	b	b	a	a	b	b	a	a	b	a	a	a	b	b	b	b	b	b	a	a	a	a	a	a	b	a	a	a	a	b	a	a
IWB8077	b	a	b	a	a	b	b	a	b	a	a	a	a	a	b	a	a	a	b	a	b	a	b	b	b	a	b	a	a	b	b	b	b	b	a	a	a	a	b	b	b	a	b	b	b	a	b	b	a
IWB7500	a	a	a	a	a	b	b	b	b	b	a	b	a	a	a	b	b	b	a	a	a	b	b	a	b	b	b	a	a	b	a	b	b	b	b	b	b	a	a	a	a	a	b	a	b	b	a	b	b
IWB21202	b	b	b	b	b	b	b	b	b	b	b	b	b	b	b	b	b	b	b	b	b	b	b	b	b	b	b	b	b	b	b	b	b	b	b	b	b	b	b	b	b	b	b	b	b	b	b	b	b
IWB15239	b	b	b	b	b	b	b	b	b	b	b	b	b	b	b	b	b	b	b	b	b	b	b	b	b	b	b	b	b	b	b	b	b	b	b	b	b	b	b	a	a	b	b	b	a	b	b	b	b
IWA1866	b	b	b	b	b	b	b	b	b	b	b	b	b	b	b	b	b	b	b	b	b	b	b	b	b	b	b	b	b	b	b	b	b	b	b	b	b	b	b	b	b	b	b	b	b	b	a	b	b
IWA404	b	a	b	a	a	b	b	a	a	a	a	b	a	b	a	a	a	a	a	a	a	b	a	a	b	a	a	a	b	a	a	b	a	a	a	a	a	a	a	a	a	a	b	a	a	a	a	a	b
IWB47753	b	b	b	b	a	b	b	b	b	b	a	b	b	b	b	b	a	a	b	b	b	a	a	b	b	b	b	b	a	b	b	b	b	b	b	a	b	b	b	b	b	b	-	b	b	a	b	a	b
IWB38708	b	a	b	b	b	b	b	b	b	b	b	b	b	b	b	b	a	a	b	b	b	a	b	b	a	b	a	b	b	a	b	a	b	b	b	b	b	b	b	b	b	b	b	b	b	b	b	b	b
IWA2018	b	a	a	a	b	a	a	b	b	a	a	a	b	b	b	a	a	a	b	a	b	b	b	b	b	b	a	b	b	b	b	b	a	a	b	b	b	b	b	b	b	b	b	a	a	a	b	a	a
IWB30790	b	b	b	b	b	b	b	b	b	b	a	b	a	b	b	a	a	a	a	b	b	b	b	b	b	b	b	b	b	b	b	b	b	b	b	b	b	b	b	a	b	a	a	b	b	b	b	b	b
IWA797	a	a	b	b	b	b	b	b	b	b	b	a	b	b	a	b	b	b	b	b	b	b	b	b	b	b	b	b	b	a	b	a	a	a	b	a	b	b	b	b	b	b	b	b	b	b	b	a	a
IWB27602	a	a	b	a	a	a	a	a	b	a	a	a	b	b	b	b	a	a	a	b	a	a	b	b	b	a	b	a	a	b	a	b	b	b	b	a	a	b	a	a	a	a	b	a	a	a	a	b	a
IWB73956	a	a	b	b	b	b	b	a	b	b	b	a	b	b	a	b	a	a	b	a	b	b	b	b	b	b	b	a	a	b	b	a	a	a	b	b	b	b	b	a	a	a	b	a	a	b	b	b	b
IWB9255	b	a	a	b	b	b	b	b	b	a	a	b	b	b	a	b	b	b	b	b	b	b	b	b	b	a	a	b	b	a	b	a	a	a	b	a	a	a	a	b	b	b	b	b	b	b	b	a	a
IWB48649	b	a	a	b	b	b	b	b	b	a	a	b	a	b	a	b	a	a	b	a	a	b	a	a	b	a	a	a	b	a	a	a	a	a	b	a	a	a	a	b	b	b	b	b	b	a	b	a	a
IWB63754	b	a	a	a	a	a	a	a	a	a	a	a	a	b	a	a	a	a	a	a	a	b	b	a	a	b	a	a	b	a	a	a	a	b	a	a	a	a	a	a	a	a	a	a	a	a	a	a	a
IWA2079	a	a	b	b	b	b	b	a	a	b	b	a	a	a	a	b	a	a	b	a	b	a	b	a	a	b	a	a	a	b	b	a	a	a	a	b	b	a	b	a	a	a	b	a	a	b	b	b	a
IWA4109	b	b	a	b	b	b	b	a	b	b	a	b	a	a	b	b	b	b	b	a	a	a	a	b	a	a	b	b	a	a	a	b	b	b	a	a	a	a	a	a	-	a	a	a	a	a	a	a	b
IWB41360	-	b	b	b	b	b	b	b	a	b	b	b	a	b	b	b	b	b	b	a	a	a	a	a	a	a	a	a	b	b	b	a	a	a	a	b	b	a	a	a	a	a	b	a	a	b	a	a	b
IWB41457	b	a	a	b	b	a	a	a	a	a	a	b	b	a	a	a	a	a	a	b	a	b	b	a	b	b	b	a	a	a	b	a	b	b	a	a	a	b	a	a	a	a	b	a	a	b	a	b	a
IWB70820	b	b	b	b	b	b	b	a	a	b	a	b	a	a	b	b	b	b	b	b	b	a	a	a	b	a	b	a	a	a	a	a	a	a	a	a	a	a	a	a	a	a	a	a	a	a	a	a	a
IWA304	a	a	a	a	a	a	a	b	a	a	a	a	a	a	b	a	a	a	a	a	a	b	a	a	a	a	a	a	a	a	b	a	a	a	a	a	a	b	a	a	a	a	a	a	a	a	a	a	a
IWB58837	a	b	a	a	a	a	a	a	a	a	a	b	a	a	a	a	a	a	a	a	a	a	a	b	a	a	b	a	a	a	b	a	a	a	b	a	a	a	a	a	a	a	a	a	a	a	a	a	b
IWB59061	b	b	a	a	a	a	a	a	a	b	a	a	a	a	a	a	a	a	a	a	a	a	a	b	b	a	b	a	a	a	a	a	a	a	a	a	a	a	a	a	a	a	a	a	a	a	a	a	a
IWB9820	a	b	b	b	a	a	a	a	a	b	b	b	b	b	b	a	a	a	a	b	b	b	a	b	b	a	b	b	b	b	a	b	b	b	b	b	b	a	b	b	b	b	b	b	b	b	a	b	b
IWA4749	a	a	a	b	b	b	b	b	a	a	a	b	b	a	a	b	b	b	b	a	a	a	a	a	b	a	b	a	a	b	a	a	b	b	a	b	a	a	a	a	a	a	a	a	a	a	a	b	a
IWB69212	a	b	b	b	b	b	b	b	b	b	b	a	b	b	b	b	b	b	b	b	b	b	b	b	b	a	b	b	b	b	b	a	a	a	b	b	b	b	a	b	b	b	b	a	b	b	a	b	b
IWB56324	b	b	a	a	a	a	a	a	a	a	a	b	a	a	b	a	a	a	a	a	a	a	a	a	a	a	a	a	a	b	a	b	b	b	a	b	a	b	b	a	a	a	a	a	a	a	b	b	b
IWB28094	b	a	a	b	b	b	b	b	a	b	b	b	b	b	b	b	b	b	b	a	a	b	b	b	b	a	b	a	b	a	a	b	b	b	b	a	b	a	a	a	a	a	a	a	a	a	a	a	a
IWB6242	a	a	a	b	a	b	b	b	a	b	b	a	a	a	a	b	b	b	b	a	a	b	a	a	a	a	b	a	b	a	b	a	a	a	b	b	b	a	a	a	a	a	a	a	a	a	a	a	b
IWA636	b	a	a	b	b	b	b	b	a	b	b	a	a	a	a	b	b	b	b	a	a	b	b	a	a	a	b	b	b	b	b	a	a	a	b	a	a	a	a	a	a	a	a	a	a	a	a	a	b
IWB35254	a	a	a	a	a	a	a	b	b	a	a	a	a	a	a	a	a	a	a	a	a	a	b	a	a	b	a	a	b	b	a	a	a	a	a	a	a	a	a	a	a	a	a	a	a	a	a	a	b
IWB73688	a	a	b	a	a	b	b	b	b	a	a	a	a	a	a	a	a	a	a	a	a	a	b	a	a	a	a	a	b	b	a	a	a	a	a	a	a	a	a	a	a	a	a	a	a	a	a	a	b
IWB41453	a	a	a	a	a	a	a	a	a	a	a	a	b	b	a	a	a	a	a	a	b	b	a	a	a	a	b	a	a	a	a	a	a	a	a	a	a	b	a	a	a	a	a	a	a	a	a	a	b
IWB13060	b	a	a	b	b	b	b	a	a	b	b	b	a	a	a	a	b	b	b	a	b	a	a	a	a	a	a	b	a	a	a	b	b	b	a	a	a	a	a	a	a	b	a	a	a	a	a	a	a
IWA4614	b	b	a	a	a	a	a	a	b	a	a	b	a	a	b	a	a	a	a	a	a	b	a	b	a	a	b	a	a	a	a	a	a	a	a	a	b	b	a	a	a	a	a	a	a	a	a	a	a
IWB27937	-	b	a	b	b	a	a	b	b	b	a	b	b	b	a	b	b	b	b	b	b	b	b	b	b	b	a	b	b	a	b	a	b	b	b	b	b	a	b	a	b	a	b	b	b	b	a	b	b
IWB68803	-	b	b	b	b	b	b	b	b	b	b	b	b	b	b	b	b	b	b	b	b	b	b	b	b	b	b	b	b	b	b	b	b	b	b	b	b	b	b	b	b	b	b	b	b	b	b	b	b
IWB7435	b	a	b	b	b	b	a	b	a	b	b	b	a	a	a	b	b	b	a	b	a	b	a	a	b	a	a	b	b	b	a	b	b	b	b	b	a	a	a	a	a	b	a	a	a	a	a	b	a
IWB60067	a	a	b	b	b	b	b	a	a	b	b	a	a	b	a	b	b	b	b	a	a	a	a	a	a	a	a	a	b	b	a	a	a	a	a	a	a	a	a	a	a	a	a	a	a	a	a	b	a
IWB11012	b	a	b	b	b	b	b	b	a	b	b	a	b	b	a	b	b	b	b	b	b	a	b	a	b	b	a	b	b	b	b	b	b	b	b	b	a	a	b	b	b	b	b	b	b	b	b	b	b
IWB48409	a	b	b	b	b	b	b	b	b	b	b	a	b	b	b	b	b	b	b	b	a	b	b	b	b	b	a	b	b	b	a	a	a	a	b	a	a	b	b	b	b	b	b	a	b	a	b	b	b
IWA7316	b	b	a	a	a	a	a	a	a	b	b	a	b	a	b	a	a	a	a	a	a	b	a	a	a	b	a	b	a	b	b	b	b	b	b	a	a	b	b	b	b	b	a	b	b	b	b	a	a
IWA1225	b	b	a	a	a	b	b	a	b	b	b	a	b	a	b	a	a	a	a	a	b	b	a	a	a	b	b	b	a	b	b	b	b	b	b	a	b	b	b	b	b	b	b	b	b	b	b	b	a
IWB62805	b	a	a	b	b	a	a	b	a	b	b	a	b	a	a	b	b	b	b	b	b	a	a	a	b	a	a	b	a	b	b	b	b	b	a	a	b	a	a	a	a	a	a	a	a	b	a	a	a
IWB33517	a	b	a	a	a	b	b	a	b	a	a	b	a	b	a	a	a	a	a	b	a	b	a	b	a	b	b	a	b	a	a	a	a	a	b	b	a	a	a	a	a	a	a	a	a	a	a	a	a
IWA4488	b	a	a	a	a	a	a	a	b	b	a	a	a	a	a	a	a	a	a	a	a	b	a	a	b	b	a	b	a	b	b	a	a	a	b	b	b	b	a	a	a	b	b	a	b	b	b	b	a
IWB50788	b	a	a	b	a	a	a	a	a	a	a	a	b	a	a	a	a	a	a	a	a	a	b	a	a	b	a	b	a	a	b	a	a	a	a	a	a	a	b	b	b	b	b	b	b	b	b	b	a
IWB61210	a	a	a	a	a	a	a	a	b	a	a	a	b	b	a	b	a	a	a	b	a	a	b	a	a	a	a	a	b	a	a	b	b	b	a	b	a	a	a	a	a	a	b	a	a	a	a	b	b
IWB65551	a	a	a	a	a	a	a	b	b	b	b	a	a	a	a	a	a	a	a	a	a	b	b	a	b	b	a	a	a	a	a	b	b	b	b	a	b	a	a	a	a	a	a	a	a	a	a	a	b
IWB28550	-	b	a	a	a	a	a	b	b	a	b	a	a	a	a	a	a	a	a	a	a	a	b	a	a	b	a	a	a	a	a	a	a	a	b	a	a	a	a	a	a	a	a	a	a	a	a	a	a
IWB23434	a	b	a	a	b	a	a	b	b	a	b	a	b	b	b	b	b	b	b	a	b	b	b	b	b	b	b	b	b	a	b	b	b	b	b	b	b	b	b	b	b	b	b	b	b	b	b	b	b
IWB23525	b	b	a	a	a	a	a	a	a	a	a	a	a	a	a	a	a	a	a	a	a	a	a	b	b	a	a	b	a	b	a	a	a	a	a	a	a	b	a	b	b	a	b	b	b	b	a	a	a
IWB34847	a	b	a	a	a	a	a	a	a	a	a	b	a	b	a	a	a	a	a	a	a	b	b	b	b	a	a	a	a	b	b	a	a	a	b	a	b	a	a	a	a	a	a	a	a	b	a	a	a
IWB4676	b	b	b	b	b	b	b	b	a	b	b	a	a	b	b	b	b	b	b	b	b	b	a	b	b	b	b	b	b	b	b	b	b	b	b	a	b	b	b	b	b	b	b	b	b	b	b	b	b
IWA691	a	a	b	b	b	a	a	b	b	a	a	a	b	a	a	b	b	b	b	b	a	a	b	a	b	a	a	a	b	a	a	a	a	a	a	b	b	a	a	a	a	a	b	a	a	a	a	b	b
IWB19579	a	b	b	b	b	a	a	b	a	b	b	a	a	b	b	b	b	b	b	b	b	b	b	b	a	b	b	b	b	a	b	a	a	a	a	a	a	b	b	b	b	a	b	a	b	b	b	b	a
IWB34607	b	b	b	b	b	b	b	b	a	b	b	b	b	b	b	b	b	b	b	b	a	a	b	b	b	b	b	a	b	b	b	b	b	b	a	b	b	b	b	a	a	a	a	a	b	a	b	b	b
IWB60859	-	b	b	b	b	b	b	b	b	b	b	b	b	b	b	b	b	b	b	b	a	b	b	b	b	b	b	b	b	b	a	b	b	b	b	b	b	b	b	b	a	b	b	b	a	a	b	b	b
IWB36032	a	b	b	a	a	b	b	a	b	a	a	b	a	b	b	a	a	a	a	a	a	b	b	b	a	b	b	a	b	a	a	a	a	a	b	b	a	b	b	b	b	b	b	b	b	a	b	b	b
IWA5031	b	a	b	b	b	b	b	b	a	b	a	b	a	b	b	-	b	b	b	a	b	a	b	a	a	b	b	a	b	a	b	b	b	b	a	b	a	a	b	b	b	b	b	b	b	b	b	b	b
IWA491	b	b	b	b	b	b	b	b	b	b	b	b	a	b	b	b	b	b	b	b	a	b	b	b	-	b	b	a	b	-	b	b	b	b	b	b	a	b	a	a	a	a	a	a	a	b	a	b	b
IWB71194	b	b	b	b	b	b	b	b	b	b	b	b	a	b	b	b	b	b	b	b	b	b	b	b	b	b	b	a	b	b	b	b	b	b	b	b	b	b	b	a	a	b	b	b	a	a	b	b	b
IWB57702	-	b	b	a	a	a	a	b	b	b	b	a	b	a	b	a	a	a	a	a	a	b	b	b	a	b	b	a	a	a	a	a	a	a	b	a	b	b	a	a	a	a	a	a	a	a	a	b	a
IWB64553	b	b	b	b	b	b	b	b	a	b	b	a	a	b	b	b	b	b	b	b	a	b	b	b	b	a	b	a	b	a	a	a	a	a	a	b	b	a	a	a	a	a	b	a	a	a	a	b	b
IWA4021	b	a	b	a	a	a	a	b	a	b	b	a	b	a	b	a	a	a	a	a	b	b	a	a	b	b	a	b	a	b	b	b	b	b	b	b	a	b	b	b	b	b	b	b	b	-	b	a	b
IWA5635	b	b	b	b	b	b	b	b	b	b	b	b	a	b	b	b	b	b	b	b	b	b	b	b	b	b	b	b	a	b	b	b	b	b	b	a	a	a	a	b	b	b	b	b	a	b	a	b	a
IWB43481	b	a	b	b	a	b	b	a	a	b	a	b	b	a	a	a	a	a	a	a	a	a	b	b	b	a	a	a	a	b	b	a	a	a	a	a	b	a	a	a	a	a	a	a	a	a	a	a	a
IWA8543	a	b	b	a	a	b	b	a	a	a	b	a	a	a	b	a	a	a	a	b	a	a	a	a	a	a	b	a	a	a	b	b	b	b	a	b	b	a	a	a	a	a	b	b	a	b	a	b	b
IWA339	b	b	b	b	b	b	b	b	a	a	a	b	b	b	b	b	b	b	b	b	b	b	b	b	b	b	b	b	b	b	b	b	b	b	a	b	b	b	b	a	a	a	b	a	a	a	b	b	b
IWA162	b	b	b	a	b	b	b	a	a	a	a	b	a	a	b	b	b	b	b	b	b	a	a	a	a	a	a	b	b	a	b	b	b	b	a	b	b	b	a	a	b	a	a	a	a	a	b	a	b
IWA7117	a	b	a	b	b	a	a	b	a	a	b	a	b	a	a	b	b	b	b	a	b	b	b	b	b	b	a	b	a	b	b	b	b	b	b	a	a	a	a	b	a	b	b	b	a	b	a	a	a
IWB30871	a	a	a	b	b	b	b	a	b	b	b	a	a	b	b	b	b	b	b	b	b	b	b	b	a	a	b	b	b	a	b	b	b	b	a	a	b	a	b	a	b	b	b	b	b	b	a	b	a
IWB52903	b	a	a	a	a	b	b	b	a	b	a	b	a	a	a	a	a	a	a	b	a	a	a	a	a	a	a	a	b	a	a	a	a	a	a	a	a	a	b	a	b	a	a	b	b	b	b	b	a
IWA3804	a	a	a	b	b	b	b	b	a	b	b	b	b	b	b	b	b	b	b	b	b	b	b	a	a	a	a	b	b	b	b	a	a	a	b	b	b	b	b	b	b	b	a	b	b	b	b	a	a
IWB35618	b	a	a	b	b	b	b	b	a	b	b	a	a	a	a	b	b	b	b	a	a	a	a	a	-	a	a	a	a	-	a	b	b	b	a	a	a	a	a	a	a	a	a	a	a	a	a	a	a
IWB4968	-	b	b	b	b	a	a	b	b	b	b	a	b	a	b	b	b	b	b	b	b	a	b	b	b	b	b	a	a	b	b	b	b	b	b	b	b	b	b	b	a	b	b	b	a	b	a	b	b
IWB22056	b	b	b	a	a	a	a	b	b	b	b	b	b	b	b	a	a	a	a	b	b	b	b	b	b	a	a	b	b	b	b	b	b	b	b	b	b	b	b	b	b	b	a	b	b	b	b	a	b
IWB59384	b	b	b	b	b	b	b	b	b	b	b	b	a	b	b	b	b	b	b	b	b	b	b	b	a	b	b	a	b	a	b	b	b	b	b	b	a	b	a	b	b	b	b	b	a	b	a	b	b
IWB24575	b	b	b	a	a	a	a	b	a	a	a	b	a	a	a	a	a	a	a	a	a	a	a	a	b	b	a	a	a	b	a	a	a	a	b	b	a	b	a	b	b	a	a	a	a	b	b	a	b
IWB8134	b	b	b	b	b	b	b	b	a	a	b	b	b	a	b	b	b	b	b	b	b	a	b	b	b	b	b	a	b	b	b	b	b	b	a	b	b	b	b	a	a	b	a	b	b	a	b	b	b
IWA4163	-	b	b	b	b	b	b	b	a	b	b	b	a	a	b	b	b	b	b	b	b	a	a	a	a	a	a	a	a	a	a	b	b	b	b	a	a	b	b	b	b	b	b	b	b	b	b	b	a
IWA6965	a	b	b	a	a	a	a	a	b	a	a	b	b	b	b	a	a	a	a	b	b	b	b	b	-	b	b	b	b	b	b	a	a	b	b	b	b	b	b	b	b	b	b	b	b	b	b	b	b
IWB3419	b	a	b	a	b	b	b	a	a	b	b	b	b	b	b	a	b	b	b	a	b	b	b	b	b	b	b	b	a	b	b	b	b	b	b	b	b	b	a	a	a	a	b	a	a	a	a	a	b
IWB69407	b	b	b	b	b	b	b	b	a	b	b	b	b	b	b	b	b	b	b	b	a	b	b	b	a	b	b	a	b	a	b	b	b	b	b	b	b	b	b	a	a	a	a	b	a	a	a	b	b
IWB47652	a	b	b	b	b	a	a	a	b	a	b	a	b	b	b	b	b	b	b	a	b	b	b	b	b	b	b	b	a	b	b	b	b	b	b	b	b	b	a	b	a	b	b	a	a	a	a	a	b
IWB7754	b	a	b	a	a	-	-	a	b	a	a	b	b	b	b	a	b	b	b	b	b	a	b	b	b	b	b	b	b	a	b	a	a	a	b	b	b	b	b	b	b	b	b	b	b	b	b	b	b
IWB52304	a	b	a	a	a	a	a	a	b	a	a	a	a	a	a	a	a	a	a	a	a	a	a	b	b	a	a	a	a	a	b	b	b	b	a	a	a	b	a	a	a	a	a	a	a	a	a	b	b
IWB36097	b	b	b	b	b	b	b	b	b	a	b	a	a	b	b	b	a	a	b	a	a	b	b	b	b	b	b	a	b	a	b	a	a	a	a	b	a	b	a	a	a	a	b	a	a	a	b	b	a
IWB329	b	b	b	b	b	b	b	b	a	a	b	a	a	b	b	b	a	a	b	a	a	b	a	b	a	b	b	a	b	a	b	a	a	a	a	b	a	a	a	a	a	a	b	a	a	a	a	b	a
IWB47487	b	b	b	b	b	b	b	a	a	a	b	b	a	b	b	b	b	b	b	a	b	a	a	b	a	b	b	b	b	b	b	-	b	b	a	a	a	b	a	a	a	b	a	b	a	b	b	a	a
IWB54551	b	a	b	a	a	b	b	b	b	b	b	b	b	b	b	b	b	b	b	b	b	b	a	a	a	b	b	a	a	b	b	b	b	b	b	b	b	b	b	b	b	a	b	b	b	b	-	a	b
IWB34377	a	a	b	b	a	b	b	a	a	a	a	a	a	b	b	b	b	b	b	b	b	a	b	b	a	b	b	a	b	a	a	a	a	a	b	a	a	a	a	a	a	b	b	a	a	a	b	b	b
IWB56896	b	b	a	b	a	b	b	a	a	a	b	b	a	a	a	b	b	b	b	a	a	a	b	b	a	b	b	a	a	a	b	a	a	a	b	a	a	b	a	a	a	b	a	a	a	a	a	a	a
IWA7850	a	b	b	b	b	a	a	b	b	a	b	a	b	b	b	b	b	b	b	b	a	b	b	b	b	b	a	b	b	b	b	b	b	b	b	b	b	b	b	a	b	a	b	b	b	b	b	b	b
IWB50417	a	a	a	a	a	a	a	a	b	a	a	a	a	a	a	a	b	b	a	b	b	a	a	a	a	a	a	b	a	a	a	a	a	a	a	a	b	a	b	b	b	b	a	b	b	b	b	a	b
IWB55668	b	b	a	a	a	b	b	a	b	a	a	b	b	b	a	a	a	a	a	a	b	a	b	a	b	a	a	a	a	b	a	b	b	b	a	a	a	b	b	b	b	b	a	b	b	b	b	a	b
IWA5959	a	b	b	b	b	b	b	b	b	b	b	b	a	b	b	b	b	b	b	a	b	a	b	b	b	b	b	a	b	b	a	a	a	a	a	b	b	a	b	b	b	b	a	b	b	b	b	a	a
IWA7263	b	b	a	b	b	b	b	b	b	b	b	a	a	b	a	b	b	b	b	a	a	a	b	a	a	b	a	b	b	a	b	a	a	a	b	a	b	a	b	b	b	b	b	b	b	b	b	a	b
IWB23105	b	b	b	b	b	b	b	b	a	b	b	b	a	b	b	b	b	b	b	a	b	b	b	b	b	b	b	a	b	b	b	b	b	b	b	a	a	b	a	a	a	a	b	a	a	a	a	b	a
IWA169	a	b	a	a	a	a	a	a	a	a	a	a	a	b	a	a	a	a	a	a	a	a	a	a	a	a	a	b	a	a	b	a	a	a	a	a	a	a	b	b	b	b	b	b	b	b	b	a	a
IWA2640	a	a	a	a	a	a	a	a	a	a	a	a	b	a	a	a	a	a	a	a	a	a	a	a	a	a	a	a	a	a	a	a	a	a	a	a	a	a	a	a	b	a	a	a	a	a	b	a	b
IWB63896	b	b	a	b	a	b	b	b	a	b	b	b	a	a	a	b	b	b	b	a	a	a	a	a	a	a	a	a	a	b	a	a	a	a	b	a	b	a	b	b	b	a	a	a	b	a	a	a	a
IWA8424	a	a	b	a	a	b	b	a	b	a	a	b	a	a	a	a	a	a	a	b	b	a	a	a	a	a	a	b	a	b	b	b	b	b	a	b	b	a	b	b	b	b	a	b	b	b	b	a	b
IWB27165	a	a	a	a	a	a	a	a	a	a	a	a	b	a	a	a	a	a	a	a	a	a	a	a	a	a	a	a	a	a	a	a	a	a	b	a	b	a	a	a	a	a	a	a	a	a	a	a	a
IWB38081	b	a	a	a	a	a	a	b	b	b	a	a	b	a	b	a	a	a	a	b	a	b	b	a	b	a	a	a	a	b	a	a	a	a	b	b	b	a	b	b	b	b	b	a	b	a	a	b	b
IWB42030	b	b	b	a	a	b	b	b	b	a	a	b	b	b	b	a	a	a	a	b	a	b	b	b	b	b	b	a	b	a	b	b	b	b	b	b	b	b	b	b	b	a	b	b	b	b	b	b	b
IWB57603	a	b	b	b	b	b	b	b	a	b	b	b	b	b	b	b	a	a	b	a	a	b	a	b	a	b	b	a	b	b	b	b	b	b	b	b	b	a	a	a	a	a	b	a	a	a	b	b	b
IWB43664	a	b	a	a	a	a	a	b	b	b	a	b	a	a	a	a	a	a	a	a	a	a	b	a	a	b	a	a	a	a	b	a	a	a	b	b	b	a	a	a	a	a	a	a	a	a	a	a	a
IWA488	b	b	b	b	b	a	a	a	a	b	b	a	a	a	b	b	b	b	b	b	a	b	b	b	b	a	a	a	b	b	b	a	a	a	b	a	a	b	a	a	a	a	b	a	a	a	a	b	a
IWB50555	a	b	b	b	b	a	a	b	b	b	b	b	b	b	a	b	b	b	b	b	a	b	b	b	a	a	b	b	b	b	a	a	a	a	b	a	b	b	a	b	b	b	b	b	a	b	a	b	b
IWA6767	b	a	a	b	b	b	b	b	b	b	b	b	a	a	a	b	b	b	b	a	a	a	b	b	b	a	a	a	a	b	b	b	b	b	b	a	a	b	b	b	b	b	a	b	b	b	b	a	b
IWB70924	-	b	a	b	b	b	b	b	b	b	a	b	b	b	a	b	b	b	b	b	a	b	b	b	b	b	b	a	b	b	a	b	b	b	b	b	b	b	b	b	b	b	b	b	b	b	b	b	b
IWB55334	b	b	a	b	b	a	a	a	a	a	a	b	b	b	b	b	b	b	b	b	a	b	b	b	b	b	a	b	b	b	b	b	b	b	b	a	a	b	b	b	b	b	b	b	b	b	b	b	a
IWA8124	b	b	a	b	b	b	b	a	b	b	b	b	b	b	a	b	b	b	b	b	b	b	b	b	b	b	b	b	b	b	a	b	b	b	b	b	b	a	a	a	a	b	a	a	a	a	a	a	a
IWB37791	b	a	a	a	a	a	a	a	b	a	a	a	a	a	a	a	a	a	a	a	b	a	a	a	a	a	a	b	a	a	b	a	a	a	a	a	a	a	b	a	a	b	a	b	a	b	b	a	a
IWA5686	a	b	a	a	a	a	a	a	b	a	a	a	a	a	a	a	a	a	a	a	a	a	a	b	b	a	a	a	a	b	a	b	b	b	a	a	a	a	a	a	a	a	a	a	a	a	a	b	a
IWB28020	b	b	a	a	b	a	a	a	a	a	a	a	b	b	b	a	a	a	b	b	a	a	a	a	b	a	b	a	a	b	a	a	a	a	a	b	a	b	a	a	a	a	b	a	a	a	a	b	b
IWB55326	a	a	a	a	a	a	a	a	a	b	b	b	a	a	b	a	a	a	a	a	a	a	b	b	b	a	a	a	a	b	a	b	b	b	a	a	a	a	b	b	b	a	a	a	a	a	a	a	a
IWB28798	b	a	a	a	a	a	a	a	a	a	a	a	a	a	a	a	a	a	a	a	a	a	a	a	a	b	a	a	a	a	a	a	a	a	a	a	b	a	a	a	a	a	a	a	a	a	a	a	a
IWA7876	b	b	b	b	b	b	b	b	b	a	b	b	b	b	a	b	b	b	b	a	b	b	a	b	b	b	b	b	b	b	b	b	b	b	b	b	b	b	b	b	b	b	b	b	b	b	b	a	b
IWB12301	b	a	b	a	a	a	a	a	a	a	a	b	a	b	a	a	a	a	a	a	a	a	a	a	a	b	a	a	a	b	b	b	b	b	a	a	a	b	a	a	a	a	a	a	a	a	a	a	a
IWA2612	a	a	a	a	a	a	a	b	b	a	a	a	b	a	a	a	a	a	a	a	a	a	a	a	a	b	a	a	a	a	a	a	a	a	a	b	b	a	a	a	a	a	a	a	a	a	a	a	b
IWA1145	b	b	b	a	a	b	b	b	b	a	a	a	b	b	a	b	a	a	a	b	a	b	b	b	b	b	b	a	a	a	b	b	b	b	b	b	b	b	b	a	b	b	a	b	b	b	a	b	b
IWB23788	a	b	a	b	b	b	b	b	b	b	b	a	b	a	b	b	b	b	b	b	b	b	b	b	b	a	b	b	b	a	b	a	a	a	b	b	b	b	b	b	b	b	b	b	b	b	b	b	b
IWB56957	b	b	a	b	b	b	b	b	a	a	a	b	a	b	b	b	b	b	b	a	-	b	b	a	b	b	a	b	b	a	b	b	b	b	b	a	a	b	a	b	b	b	a	b	b	a	b	a	a
IWB13403	a	a	a	a	a	a	a	a	a	a	b	a	a	a	a	a	a	a	a	a	a	b	a	a	a	a	a	a	a	a	a	a	a	a	a	b	b	a	a	a	a	a	b	a	a	a	a	a	a
IWB64479	a	a	a	b	b	a	a	b	b	b	b	a	b	a	b	b	b	b	b	b	a	b	b	a	a	b	b	a	b	b	b	b	b	b	b	b	b	b	b	b	b	b	a	b	b	b	b	b	b
IWB12574	a	b	a	b	b	b	b	a	-	a	a	a	a	a	a	b	b	b	b	b	a	a	a	a	b	a	a	b	a	b	b	a	a	a	b	a	a	b	a	a	a	b	b	a	a	b	b	b	b
IWB35952	b	a	a	-	a	a	a	b	a	a	a	a	b	a	b	a	a	a	a	a	-	b	a	a	b	b	a	b	a	b	b	a	a	a	a	a	b	a	a	a	a	b	a	a	a	a	a	a	b
IWB13199	b	a	a	a	a	a	a	a	a	a	a	a	a	a	a	a	a	a	a	a	a	a	a	a	a	a	a	a	a	a	b	a	a	a	a	a	a	b	a	b	b	b	a	b	b	a	b	a	b
IWA7696	b	a	b	a	a	a	a	a	a	a	a	a	a	b	b	a	a	a	a	a	b	a	a	a	b	a	b	a	a	b	a	a	a	a	a	a	a	a	b	b	b	b	a	b	b	b	b	a	a
IWB60771	b	b	b	b	b	b	b	b	b	b	b	b	b	b	b	b	b	b	b	b	b	b	b	b	b	b	b	a	b	b	b	b	b	b	b	b	b	b	b	b	b	a	a	b	b	b	a	b	b
IWB54219	b	b	b	b	b	a	a	b	b	b	b	b	a	a	a	b	b	b	b	a	a	b	a	a	a	b	b	a	b	b	a	b	b	b	b	a	b	b	a	b	a	a	a	a	a	a	a	b	b
IWB35950	a	b	b	b	a	b	b	a	b	b	a	a	b	b	b	a	a	a	b	b	a	b	b	b	b	b	b	b	b	b	a	b	b	b	b	b	b	a	a	b	b	a	b	b	a	b	b	b	a
IWB27536	a	a	a	a	a	a	a	a	a	a	a	a	a	b	a	a	a	a	a	b	b	a	b	a	a	b	a	b	b	a	a	b	b	b	a	a	a	b	a	a	a	b	a	b	b	a	b	a	a
IWB27363	b	b	b	a	a	b	b	a	a	a	a	b	b	b	b	a	b	b	b	a	b	b	b	b	a	b	b	b	b	a	a	b	b	b	a	b	a	b	b	b	b	b	b	b	b	b	b	b	b
IWB28780	-	a	b	b	b	b	b	a	a	a	a	b	a	b	a	a	a	a	b	b	b	a	b	a	a	a	a	b	b	b	b	a	a	a	a	a	a	b	b	b	b	b	b	b	b	b	a	b	a
IWB28028	-	b	b	b	b	b	b	b	b	b	b	b	b	b	b	b	b	b	b	a	a	a	b	b	b	b	b	a	b	b	b	b	b	b	b	b	b	a	a	a	a	a	b	a	a	a	b	b	b
IWB38942	a	a	a	a	a	b	b	b	a	b	a	b	a	b	a	a	a	a	a	b	a	a	a	a	b	a	b	b	a	a	b	a	a	a	a	a	b	a	b	b	b	b	a	b	b	b	b	a	a
IWB49539	b	a	a	a	a	a	a	b	b	a	b	a	a	a	a	a	a	a	a	b	a	a	b	b	a	a	b	b	b	a	b	b	b	b	a	b	b	b	b	b	b	b	b	b	b	b	b	b	b
IWB73061	a	a	a	b	a	a	a	b	b	a	b	a	a	a	a	b	a	a	a	b	a	b	b	a	a	a	b	a	a	a	a	a	a	a	b	b	b	b	a	a	a	a	a	a	-	a	a	a	a
IWB11935	a	a	b	b	a	a	a	a	a	b	a	b	a	b	b	a	b	b	b	a	b	a	a	b	b	a	b	b	b	a	b	b	a	a	a	b	a	a	b	b	b	b	b	b	b	b	b	b	a
IWB57220	b	b	b	b	b	b	b	b	b	b	b	b	b	a	b	b	b	b	b	b	b	b	a	a	a	b	b	b	b	b	b	b	b	b	a	b	b	b	b	b	b	b	b	b	b	b	b	b	a
IWB29480	b	a	b	b	a	a	a	a	b	a	a	a	a	b	b	a	b	b	a	b	b	a	b	b	b	b	b	b	b	b	a	b	b	b	a	a	a	b	b	b	b	b	b	b	b	b	b	a	a
IWA3710	a	a	a	b	b	a	a	a	b	b	b	b	a	a	b	b	b	b	b	a	a	b	a	a	b	a	b	a	b	a	b	b	b	b	b	a	a	b	b	b	b	b	b	b	b	b	b	b	b
IWB58700	b	b	a	b	b	b	b	b	a	b	b	b	a	b	b	b	b	b	b	b	a	b	b	b	b	b	b	b	b	b	b	b	b	b	b	a	b	b	b	a	b	a	b	a	a	a	a	a	b
IWB65260	b	a	b	b	a	b	b	b	b	b	b	b	b	b	b	b	b	b	a	b	a	b	b	b	b	b	b	a	b	b	b	a	a	a	a	a	b	b	b	b	b	b	b	b	a	b	a	a	a
IWB32621	b	b	a	b	a	b	b	b	b	b	b	a	b	a	a	b	a	a	a	b	b	b	b	a	b	a	b	a	a	a	b	b	b	b	b	a	b	a	a	a	a	a	a	a	a	a	b	b	a
IWB40528	b	b	b	b	a	b	b	b	b	b	b	b	a	b	b	b	b	b	b	b	a	b	b	b	b	b	b	a	b	b	b	b	b	a	b	b	b	b	a	a	b	b	a	b	a	b	b	b	b
IWB73166	b	b	b	b	b	b	b	b	b	b	b	b	b	b	b	b	b	b	b	b	b	b	b	b	b	b	b	a	b	b	b	b	a	a	b	b	b	b	b	b	b	b	b	a	a	a	b	b	b
IWB65525	b	a	a	a	a	a	a	a	a	a	a	a	b	a	a	a	a	a	a	a	a	a	b	b	a	a	a	a	a	b	a	a	a	a	a	a	a	a	a	a	a	a	a	a	a	a	a	a	a
IWB1301	b	b	b	a	a	b	b	b	a	a	a	a	b	b	a	a	a	a	a	b	b	a	b	b	a	b	a	b	a	b	b	a	a	a	a	b	b	a	a	a	a	a	b	a	a	a	a	a	a
IWB493	-	b	b	b	b	b	b	b	b	b	a	b	b	b	b	b	b	b	b	b	b	b	b	b	b	b	b	b	b	b	b	b	b	b	b	b	b	b	b	b	b	b	b	b	b	b	b	b	b
IWB4655	-	b	b	b	b	b	b	b	b	b	b	b	b	b	b	b	b	b	b	b	a	b	b	b	b	b	b	b	b	b	b	b	b	b	b	b	b	b	a	b	b	b	b	b	b	b	b	b	b
IWB9976	a	b	a	a	b	a	a	a	a	a	a	a	b	a	a	a	b	b	a	a	a	a	b	b	b	a	a	b	a	b	b	b	b	b	a	a	b	a	b	a	a	b	b	b	b	a	b	b	a
IWB61907	a	a	b	b	b	b	b	b	b	b	b	b	b	b	b	b	b	b	b	b	b	a	b	b	b	b	b	b	b	b	b	b	b	b	a	b	b	b	b	b	b	b	b	b	b	b	b	b	b
IWB48703	a	b	b	a	a	b	b	a	b	b	b	b	a	b	b	a	b	b	a	b	b	b	a	a	b	a	a	b	b	b	a	b	b	b	b	b	b	b	b	b	b	b	a	b	b	b	b	b	b
IWB26909	b	b	b	b	b	b	b	b	b	b	b	b	b	b	b	b	b	b	b	b	b	b	b	b	b	b	b	b	b	b	b	b	b	b	b	b	b	b	b	b	b	b	b	b	b	b	b	b	b
IWA1796	b	b	a	b	b	a	a	a	b	b	b	b	b	b	a	b	b	b	b	b	b	a	b	b	b	b	b	a	a	a	b	b	b	b	a	b	b	-	b	b	b	b	b	b	b	b	b	b	b
IWB12516	b	a	a	a	a	a	a	a	a	a	a	a	a	a	a	a	a	a	a	a	a	a	b	b	a	a	a	a	a	b	a	a	a	a	a	a	a	a	a	a	a	a	a	a	a	a	a	a	a
IWB47000	b	b	a	a	a	a	a	a	a	a	a	a	a	a	b	a	a	a	a	a	a	b	a	a	a	a	a	a	a	a	a	b	a	a	b	a	a	a	a	a	a	a	a	a	a	a	a	a	a
IWB28092	b	a	b	b	b	b	b	b	a	a	a	b	b	a	b	b	b	b	b	b	a	b	b	a	a	b	b	b	b	a	b	b	b	b	a	b	b	b	b	a	a	a	a	b	b	a	b	b	b
IWB21714	-	b	b	b	b	a	a	b	b	b	b	b	b	b	b	b	b	b	b	b	b	a	b	b	b	b	b	b	b	b	b	a	a	a	b	b	b	a	b	b	b	b	-	b	a	b	b	b	b
IWA3615	a	a	b	b	a	b	b	b	b	b	b	b	a	a	b	b	b	b	b	b	b	b	b	b	b	a	b	b	b	b	b	b	b	b	b	a	a	b	b	b	b	b	b	b	b	a	b	b	b
IWB41676	b	a	b	a	b	a	b	b	a	b	b	b	a	a	a	b	b	b	a	b	b	b	a	a	a	a	a	b	b	b	a	a	b	b	a	b	a	a	b	b	b	b	b	b	b	b	b	a	a
IWA4261	b	b	b	a	b	a	a	a	a	a	a	b	a	a	a	b	b	b	a	b	b	b	a	a	b	a	b	b	b	a	a	b	b	b	b	b	a	b	b	b	b	b	b	b	b	a	b	a	b
IWB43914	a	a	a	b	b	b	b	a	b	a	a	a	a	a	a	b	b	b	b	a	a	b	a	a	a	a	b	a	a	a	a	b	a	a	a	a	b	a	a	a	a	a	a	a	a	a	a	-	a
IWB61486	a	b	a	a	b	b	b	a	a	b	b	b	a	b	b	a	b	b	b	b	b	a	b	a	b	b	b	b	b	b	a	b	a	a	b	b	b	a	b	b	b	b	b	b	b	b	b	b	b
IWB39342	a	b	b	a	b	a	b	a	b	a	b	b	b	b	b	a	a	a	a	b	b	b	b	b	b	b	b	b	b	b	b	b	b	b	b	b	b	b	a	b	b	a	b	a	a	b	b	b	b
IWB48196	a	b	a	a	a	a	a	b	b	a	b	a	a	a	a	a	a	a	a	b	b	a	a	a	a	a	b	b	b	a	b	b	b	b	b	b	a	b	b	b	b	b	a	b	b	b	b	a	a
IWB3001	b	a	b	b	a	b	b	a	a	a	b	b	b	b	a	a	b	b	a	b	b	b	b	b	b	b	a	b	b	b	b	b	b	b	a	b	b	b	b	b	b	b	a	b	b	a	b	a	b
IWB1321	b	b	b	a	a	b	b	b	a	a	a	b	b	b	b	a	a	a	a	b	b	a	b	b	a	a	b	b	b	a	b	b	b	b	a	b	a	a	b	b	b	b	b	b	b	b	b	a	a
IWB6961	b	a	a	b	a	b	b	a	a	a	a	a	b	a	a	b	b	b	b	b	a	b	b	b	a	b	b	a	a	b	a	a	a	a	a	a	b	a	b	b	b	b	a	b	b	a	a	a	b
IWB15013	b	a	a	a	b	a	a	a	a	a	a	a	a	a	b	a	b	b	a	a	a	a	a	a	a	a	b	a	a	a	a	a	a	a	a	b	a	a	a	a	a	a	a	a	a	a	a	a	a
IWB6362	a	a	a	b	a	b	b	b	b	b	b	a	b	b	b	a	a	a	b	a	a	a	b	b	a	b	a	a	a	b	b	a	a	a	a	a	b	a	a	a	a	a	a	a	a	b	a	b	a
IWA3993	b	a	a	b	b	b	a	b	a	a	a	b	a	b	a	b	b	b	b	b	b	b	a	a	b	a	a	a	b	b	a	a	a	a	a	b	a	a	a	a	a	a	a	a	a	b	a	a	b
IWB7495	b	a	a	b	a	a	a	a	b	a	a	b	b	a	a	b	a	a	b	b	b	b	a	a	b	a	b	b	b	b	a	b	b	b	b	a	b	b	b	b	b	b	a	b	b	b	b	a	a
IWB34056	b	a	b	a	a	a	a	b	a	a	a	a	a	a	a	a	a	a	a	b	a	a	b	b	b	b	b	a	b	b	a	a	-	b	a	a	a	a	a	a	a	a	a	a	a	a	a	b	a
IWB43298	b	a	a	a	b	a	a	a	a	b	b	b	b	b	a	b	a	a	a	b	b	a	b	a	b	a	b	b	b	b	b	b	b	b	a	b	b	a	b	b	b	b	a	a	b	a	a	a	b
IWB24647	b	b	b	b	b	b	b	a	b	b	b	b	b	b	b	b	b	b	b	a	b	b	b	b	b	b	a	a	a	b	a	a	b	b	a	a	b	b	a	a	a	a	b	a	a	b	a	b	b
IWA4055	b	b	b	b	b	b	b	b	b	a	b	b	b	b	b	b	b	b	b	b	b	b	b	b	b	-	b	b	b	b	b	b	b	b	a	b	b	b	b	b	b	b	b	b	b	b	b	b	b
IWB40627	b	a	b	b	b	a	a	b	b	a	a	b	b	a	b	b	b	b	a	b	b	a	b	a	b	b	b	b	b	b	a	b	b	b	b	b	b	a	b	b	b	b	b	b	b	b	b	b	b
IWA8342	a	a	a	b	a	b	b	b	b	b	b	b	b	b	b	b	a	a	b	b	a	b	b	b	b	a	a	b	a	b	b	a	a	a	b	a	b	b	a	b	b	a	b	b	b	b	b	b	b
IWB32833	a	a	a	a	a	a	a	a	a	a	a	b	b	a	a	a	a	a	a	a	a	b	b	a	a	a	b	a	a	-	a	a	a	a	a	a	a	a	a	a	a	a	a	a	a	a	a	a	b
IWB62686	b	b	b	b	b	b	b	b	a	b	a	b	b	b	b	b	b	b	b	b	b	b	b	b	b	b	b	b	b	b	b	b	b	b	b	b	b	a	b	b	b	b	b	b	b	b	a	b	b
IWB58056	a	a	a	a	a	a	a	a	b	a	a	a	a	a	a	a	a	a	a	b	a	b	a	b	a	a	a	b	a	b	a	b	b	b	a	a	a	a	b	b	b	b	b	b	b	b	b	a	a
IWB71624	-	a	a	a	a	a	a	a	a	b	b	b	a	a	a	a	a	a	a	b	b	a	a	b	a	a	a	b	a	a	a	b	a	a	a	a	a	a	b	b	b	b	a	b	b	b	b	a	a
IWB26282	a	b	b	a	a	a	b	a	a	b	a	a	b	a	b	a	a	a	a	a	b	b	a	a	b	a	b	b	b	a	a	a	a	a	b	a	b	b	b	a	b	a	a	b	b	b	b	b	a
IWB8906	a	b	a	a	a	b	b	b	b	b	b	b	a	b	b	b	a	a	b	b	a	b	b	b	b	a	b	b	b	a	b	a	a	a	b	b	b	a	a	a	a	a	a	a	a	a	a	b	b
IWB68186	b	a	b	a	a	a	a	a	a	a	b	a	b	a	b	a	a	a	a	b	b	a	a	b	a	a	a	b	a	b	a	a	a	a	b	a	b	b	b	b	b	b	a	b	b	b	a	a	a
IWA5485	b	b	a	a	b	b	b	b	b	b	b	a	a	b	a	b	b	b	b	a	b	b	b	b	a	a	a	b	a	b	b	a	a	a	b	b	b	b	b	b	b	b	b	b	b	b	b	a	a
IWB24716	a	a	a	b	b	a	a	b	a	a	a	b	b	a	b	b	a	a	a	a	b	b	b	b	a	b	b	b	b	b	a	a	a	a	a	b	b	a	a	a	a	b	b	a	a	b	b	b	a
IWA7405	b	a	b	b	b	b	b	b	b	a	b	b	b	b	b	b	b	b	b	a	a	b	b	b	b	-	b	a	b	b	b	b	b	b	a	b	a	a	a	a	a	b	b	b	a	a	a	b	a
IWA7130	b	b	b	b	b	b	b	b	b	b	b	b	b	b	b	b	b	b	b	a	b	b	a	a	a	a	b	b	b	a	a	b	b	b	a	a	a	a	b	b	b	b	b	b	b	a	b	b	b
IWA7404	a	b	a	a	a	a	a	a	a	b	a	a	a	a	a	a	a	a	a	b	b	a	a	a	a	a	a	b	a	a	a	a	a	a	b	a	b	b	b	b	b	a	a	a	b	b	b	a	b
IWB4800	b	a	b	a	a	b	b	b	a	b	b	a	b	a	a	a	b	b	a	a	a	b	b	b	b	a	a	a	a	a	a	b	b	b	a	a	a	b	a	b	a	b	a	a	b	a	a	a	b
IWB30321	b	b	b	b	b	b	b	a	b	a	a	b	b	b	b	b	b	b	b	b	b	b	a	a	a	b	b	b	b	b	b	b	b	b	b	b	b	a	b	b	b	b	b	b	b	b	b	b	b
IWB10795	b	b	a	b	b	b	b	a	a	b	b	a	b	b	a	a	b	b	a	b	b	b	b	b	b	b	b	b	b	b	b	b	b	b	b	b	b	b	b	b	b	b	b	b	b	b	b	b	b
IWB26368	b	a	b	b	b	b	b	b	b	b	b	b	b	a	b	b	b	b	b	b	b	a	b	b	b	a	b	b	a	b	b	a	-	a	a	a	b	a	b	b	b	b	b	b	b	b	b	b	a
IWB11638	-	a	b	b	b	b	b	b	b	b	b	b	b	b	b	b	b	b	b	b	b	b	b	b	b	a	a	b	b	b	b	b	b	b	a	a	a	a	b	b	b	b	a	b	b	b	b	a	b
IWA7598	b	a	a	a	a	a	a	b	b	a	a	a	a	b	a	a	a	a	a	a	a	b	b	b	b	a	a	a	a	a	a	b	b	b	a	a	a	b	a	a	a	a	b	a	a	a	a	b	b
IWB25279	b	b	b	b	b	a	a	b	b	a	a	a	a	b	b	b	b	b	b	b	b	b	a	a	b	a	b	b	b	b	a	b	b	b	b	a	a	b	b	a	a	b	a	b	b	b	b	b	a
IWB71391	b	b	b	b	b	b	b	b	b	b	b	b	a	b	b	b	b	b	b	b	a	b	b	b	b	b	b	a	b	b	b	b	b	b	b	b	b	b	a	a	a	a	b	a	a	a	b	b	b
IWA4276	b	a	a	a	a	a	a	a	a	a	a	a	a	a	b	a	a	a	a	b	a	a	a	a	a	a	a	b	a	b	a	a	a	a	a	a	b	b	a	b	b	b	b	a	b	a	a	b	a
IWB27613	a	b	a	a	a	b	b	b	b	a	b	b	a	a	a	a	a	a	a	a	a	a	a	b	b	a	a	a	a	a	a	b	b	b	b	a	b	a	a	a	a	a	a	a	a	a	a	a	b
IWB52993	a	a	a	b	a	a	a	a	a	a	a	a	b	a	a	a	a	a	a	b	a	a	a	a	a	a	a	b	a	a	a	a	a	a	a	a	a	a	a	b	b	a	a	a	b	a	a	a	a
IWA936	a	b	a	a	b	b	b	b	b	a	a	b	b	a	a	a	b	b	b	a	a	a	b	b	b	b	b	a	b	a	a	a	a	a	b	a	b	b	a	a	a	a	b	a	a	a	a	b	b
IWB40478	a	b	a	b	b	b	b	b	b	a	a	a	a	b	b	b	b	b	b	a	b	b	b	b	a	a	b	a	b	b	a	a	a	a	b	a	b	b	a	a	a	a	b	a	a	a	a	b	a
IWB38177	a	a	b	b	b	b	b	b	a	b	a	b	b	a	b	b	b	b	b	b	b	a	a	a	a	a	b	b	b	b	a	b	b	b	a	b	a	a	b	b	b	a	b	b	b	b	b	b	b
IWB10054	a	a	b	b	b	b	b	b	b	b	b	a	b	b	b	b	b	b	b	a	a	b	b	b	b	a	b	a	b	b	b	b	b	b	a	a	a	b	a	a	a	b	a	a	b	b	b	b	a
IWB34800	b	a	a	a	a	a	a	a	b	a	a	a	a	a	a	a	a	a	a	b	a	a	a	a	b	a	a	a	a	a	a	b	b	b	a	b	a	a	b	a	b	a	a	b	b	b	a	b	a
IWA4415	b	b	b	b	b	b	b	b	b	a	a	a	b	b	b	b	b	b	b	b	b	b	b	b	b	a	b	b	b	a	b	b	b	b	b	a	b	b	b	b	b	b	b	b	b	b	b	b	a
IWB9802	-	b	a	b	b	b	b	b	a	b	b	a	b	b	a	b	b	b	b	a	b	b	b	a	b	b	b	b	b	a	b	b	a	a	a	b	a	b	a	b	a	b	b	a	a	a	b	b	a
IWA3702	a	a	a	a	a	a	a	b	b	a	a	a	a	a	a	a	a	a	a	a	a	b	a	a	a	a	a	a	a	a	a	a	a	a	b	a	a	a	b	a	a	a	a	a	a	a	a	a	a
IWA7701	b	b	a	a	a	a	a	a	b	b	b	a	b	b	b	a	a	a	a	b	b	b	b	b	a	b	a	a	b	b	b	b	b	b	b	b	b	b	b	b	b	b	b	a	b	b	b	a	b
IWA4533	b	a	a	b	b	b	b	a	a	b	b	b	b	b	a	b	b	b	b	b	a	b	b	a	b	a	a	a	b	b	a	b	b	b	a	a	a	a	b	a	a	b	b	b	b	b	b	a	a
IWA2916	a	b	b	a	a	a	a	a	a	a	a	a	a	b	a	a	a	a	a	a	a	b	a	a	a	a	a	a	b	a	a	a	a	a	b	a	a	b	a	a	a	a	b	a	a	a	a	a	a
IWB62170	b	b	b	b	b	b	b	a	b	b	b	b	b	b	b	a	a	a	a	b	b	a	b	b	a	b	b	b	b	b	b	b	b	b	b	b	b	a	b	a	b	b	b	b	b	b	b	b	b
IWB43526	b	b	b	a	a	b	b	a	b	b	b	a	b	a	a	a	a	a	a	a	a	a	b	b	-	a	a	b	a	b	b	b	b	b	b	b	b	a	b	a	b	b	a	b	b	b	a	a	b
IWB65574	a	b	b	b	b	b	b	b	b	a	b	b	a	b	b	b	b	b	b	b	b	a	a	b	b	a	b	a	b	a	b	b	b	b	a	a	a	a	a	a	a	b	b	a	a	b	a	a	b
IWA7262	a	a	b	a	a	a	a	a	b	a	a	a	a	a	a	a	a	a	a	b	a	b	b	b	b	b	a	a	a	a	a	a	b	b	b	a	a	b	b	b	b	a	a	b	b	b	a	a	b
IWB47623	b	b	b	b	b	b	b	b	a	b	b	b	b	a	b	b	b	b	b	a	b	a	a	a	a	a	b	b	a	b	b	b	a	a	a	b	b	a	a	a	a	b	b	a	a	a	b	b	a
IWA1695	-	b	b	b	b	b	b	b	b	b	b	b	a	a	b	b	b	b	b	b	b	a	a	b	b	b	b	b	b	b	b	b	b	b	b	b	b	b	b	b	b	b	b	b	a	b	b	b	b
IWB6049	a	b	a	a	a	a	a	b	b	b	a	a	b	a	b	b	b	b	b	b	b	b	b	b	b	b	b	b	a	b	b	a	a	a	b	b	b	b	b	b	b	b	b	b	b	b	b	b	b
IWB9795	-	b	a	a	a	a	a	a	a	a	a	a	a	a	a	a	a	a	a	a	a	b	a	a	a	a	a	a	a	a	a	a	a	a	b	a	a	b	a	a	a	a	a	a	a	a	a	a	a
IWB62422	a	a	a	a	a	b	b	a	a	a	a	b	b	a	b	a	a	a	a	b	a	a	b	b	a	a	a	a	a	b	b	a	a	a	a	a	b	a	a	b	b	a	b	a	a	b	a	b	b
IWB33739	a	a	a	b	b	a	a	b	a	a	a	a	b	a	b	b	a	a	a	a	b	a	a	b	b	b	b	a	a	a	a	a	a	a	a	a	b	b	a	b	b	a	b	b	a	b	a	b	b
IWA3971	b	b	a	b	b	b	b	b	a	b	b	b	b	b	b	b	b	b	b	b	b	b	b	b	b	b	b	b	b	b	b	a	a	a	b	b	b	b	b	b	b	b	b	b	b	b	b	b	b
IWB53134	a	a	a	a	a	a	a	a	a	a	a	b	b	a	a	a	a	a	a	b	a	a	a	a	b	b	a	a	a	b	a	a	a	a	a	b	a	a	a	a	a	a	a	a	a	a	a	a	a
IWB47961	b	a	a	a	a	a	a	a	b	a	-	b	b	a	b	a	a	a	a	a	b	a	a	b	b	a	a	a	a	a	b	a	a	a	a	b	a	b	a	a	a	a	a	a	a	a	a	a	b
IWB61742	a	a	a	a	a	a	a	a	b	a	a	b	a	a	a	a	a	a	a	a	b	b	a	a	a	a	a	a	a	a	a	a	a	a	a	a	a	a	b	b	b	a	a	a	a	b	b	a	a
IWB21175	b	b	b	a	a	a	a	b	b	b	b	a	a	b	b	a	a	a	a	a	b	a	a	b	a	b	b	a	b	a	a	b	b	b	b	b	a	b	b	b	b	b	b	b	b	a	b	b	a
IWB73405	b	b	b	b	a	b	b	b	b	b	b	a	b	b	a	a	b	b	a	b	a	b	b	b	b	a	b	a	b	b	b	b	b	b	b	b	b	b	a	a	a	b	a	b	b	b	a	a	a
IWB55386	b	a	a	b	b	a	a	b	a	b	a	b	a	a	b	b	a	a	a	b	a	b	a	b	a	b	b	a	a	a	a	b	a	a	b	b	b	b	a	a	a	a	a	a	a	a	b	b	b
IWB34654	b	b	b	b	b	b	b	a	a	b	b	b	a	b	b	b	b	b	b	b	b	b	a	b	b	b	b	b	b	b	a	b	b	b	b	a	a	a	a	a	a	b	b	a	a	a	b	b	b
IWB1614	a	a	a	a	a	a	a	a	a	a	a	a	b	a	a	a	a	a	a	a	a	a	b	b	a	a	a	a	a	a	b	a	a	a	a	a	a	a	a	a	a	a	a	a	a	a	a	a	a
IWB44547	b	b	b	b	b	a	a	b	b	b	b	a	a	b	a	b	b	b	b	a	a	b	a	a	b	b	b	a	b	a	b	b	b	b	b	b	b	b	a	b	b	b	a	b	b	a	a	a	a
IWB64579	a	a	a	b	b	b	b	b	a	b	b	a	a	a	a	b	b	b	b	a	a	a	a	a	a	b	b	b	a	a	b	a	a	a	b	b	a	a	a	a	a	a	a	a	a	a	a	b	a
IWB40555	b	b	b	b	b	b	b	b	b	b	b	b	b	b	a	b	b	b	b	a	a	a	b	b	b	b	b	b	b	b	b	a	b	b	b	b	b	b	a	a	a	a	b	a	a	a	a	b	b
IWB63308	b	a	b	a	b	a	a	a	b	a	a	b	a	b	b	a	a	a	a	a	a	b	a	a	b	a	a	a	b	a	b	b	a	a	a	a	a	b	a	a	a	a	a	a	a	a	a	a	a
IWB60687	b	b	b	a	a	a	a	b	b	a	a	b	b	b	b	b	a	a	b	b	b	b	a	b	b	b	b	b	a	b	b	b	b	b	b	a	a	b	b	a	a	b	b	a	a	a	a	b	a
IWB17986	b	b	b	b	b	b	b	b	b	b	b	b	b	b	b	b	b	b	b	b	b	b	b	b	b	b	b	b	b	b	b	b	b	b	b	b	b	b	b	b	b	a	b	a	a	b	b	b	b
IWA7802	b	a	a	b	b	b	b	b	b	b	b	-	b	b	b	b	b	b	b	b	a	a	b	b	b	b	b	a	b	b	a	b	b	b	b	b	b	a	a	a	a	b	a	a	a	b	b	a	b
IWB74620	b	b	b	b	b	b	b	b	a	a	a	b	b	b	a	b	b	b	b	b	b	b	a	a	b	a	a	b	b	b	b	b	b	b	a	a	b	b	b	b	b	b	b	b	b	b	b	a	b
IWB25986	a	a	b	a	a	a	a	a	b	a	a	a	a	a	b	a	a	a	a	a	a	a	a	b	a	a	a	a	a	b	b	a	a	a	a	a	a	b	a	a	a	a	a	a	a	a	a	a	a
IWB62261	a	a	b	b	b	b	b	b	b	b	a	a	b	b	b	b	b	b	b	a	b	a	b	b	b	b	b	b	b	b	b	a	b	b	a	b	b	b	b	b	b	b	a	b	b	b	b	a	a
IWA3677	b	b	b	a	a	b	b	a	b	a	-	b	b	b	b	a	a	a	a	b	a	a	a	b	b	a	a	b	b	b	b	b	b	b	a	a	a	b	a	a	a	b	b	a	a	b	b	b	b
IWB59737	a	b	a	b	b	a	a	b	b	b	b	a	a	b	a	b	b	b	b	b	b	b	b	a	b	b	b	b	b	b	b	a	a	a	b	b	b	b	b	b	b	b	a	b	b	a	a	b	a
IWA1657	b	b	b	b	b	b	b	b	b	b	-	b	b	b	a	b	b	b	b	a	b	b	b	a	b	b	b	b	b	b	a	b	b	b	b	b	b	a	b	b	b	b	b	-	b	a	b	b	b
IWB35426	a	b	a	b	b	a	a	a	a	b	a	a	a	a	a	b	b	b	b	a	a	b	b	a	a	b	b	a	a	a	a	a	a	a	b	b	b	b	a	a	a	a	a	a	a	a	a	a	a
IWB11675	b	b	b	b	a	b	b	b	b	b	b	a	b	a	b	b	b	b	a	a	b	b	b	b	b	a	b	a	a	b	b	b	b	b	b	a	b	b	b	b	b	b	b	b	b	a	b	b	b
IWB44954	b	b	b	b	b	b	b	b	b	b	b	b	b	b	b	b	b	b	b	b	b	b	b	b	b	b	a	b	b	-	b	b	b	b	b	b	b	b	a	a	a	b	b	a	a	b	a	b	b
IWA6550	a	a	b	b	a	b	b	b	a	a	a	a	a	a	a	b	b	b	b	a	b	a	a	a	a	a	b	b	a	a	a	a	a	a	a	b	b	a	b	b	b	b	a	b	b	b	b	a	a
IWB56415	a	b	a	b	b	a	a	b	a	b	b	a	a	b	b	b	b	b	b	b	b	b	b	a	b	b	b	b	b	b	b	a	a	a	b	b	b	b	b	b	b	b	b	b	b	a	b	a	a
IWB73396	-	b	b	a	a	a	a	b	b	a	a	a	b	b	b	a	a	a	a	a	b	a	b	b	b	b	b	b	b	b	b	a	a	a	a	b	b	b	b	b	b	b	b	b	b	b	b	a	a
IWA8165	b	b	b	b	b	a	a	a	a	b	a	b	b	b	a	b	b	b	b	b	a	b	b	b	b	b	b	a	a	a	a	a	a	a	b	b	b	b	b	a	a	b	b	b	b	b	a	a	a
IWB10695	a	b	a	b	a	b	b	b	a	b	b	a	a	a	a	b	b	b	b	a	b	b	b	b	a	a	a	b	a	a	a	a	a	a	b	b	b	b	b	b	b	b	a	b	b	a	b	a	a
IWA2219	-	a	a	a	a	a	a	a	a	a	a	b	a	b	a	a	a	a	a	a	a	a	a	b	b	a	a	a	a	b	a	b	b	b	a	a	a	a	a	a	a	a	b	a	a	a	b	a	b
IWB15726	b	b	a	b	b	a	a	b	b	b	b	a	a	b	b	b	b	b	b	b	b	b	b	b	b	b	b	a	b	a	b	a	a	a	b	a	b	b	b	b	b	b	b	b	b	b	b	b	b
IWB42250	b	b	b	b	b	b	b	b	b	b	b	a	b	b	b	b	b	b	b	b	b	b	b	a	b	b	b	a	a	b	b	b	b	b	b	-	b	b	a	a	b	b	b	b	b	b	b	b	b
IWB35971	a	b	b	b	b	b	b	b	b	b	b	a	a	b	b	b	b	b	b	b	b	b	b	a	b	b	b	b	b	a	b	b	a	a	b	b	b	a	b	a	a	b	b	b	a	a	b	b	b
IWA7816	b	b	a	b	b	b	b	b	b	b	b	a	a	a	b	b	b	b	b	b	b	a	a	a	b	a	b	b	a	b	b	a	a	a	b	b	b	a	b	b	b	b	b	b	b	b	b	b	a
IWB24222	b	a	a	a	a	a	a	b	a	a	a	a	a	b	a	a	a	a	a	b	b	a	a	a	a	a	a	a	b	a	a	a	a	a	a	b	a	a	b	a	a	b	a	b	a	a	a	a	a
IWB71433	-	a	b	a	a	a	a	a	a	a	a	a	a	a	a	a	a	a	a	a	a	a	a	a	a	b	a	a	a	a	a	a	a	a	b	b	a	a	a	a	a	a	b	a	a	a	a	b	a
IWB64974	-	a	b	a	a	a	a	a	a	a	a	a	a	a	b	a	a	a	a	a	a	a	a	a	a	a	a	a	a	a	a	a	b	b	a	a	a	a	a	a	a	a	a	a	a	a	a	a	a
IWB55144	b	b	b	b	b	b	b	b	b	b	b	b	b	b	b	b	b	b	b	b	b	b	b	b	b	a	a	b	b	b	b	b	b	b	b	b	b	b	b	b	b	b	b	b	b	b	b	b	b
IWB31753	b	b	b	b	b	b	b	b	b	b	-	a	a	a	b	b	b	b	b	b	a	b	b	b	b	b	b	b	b	b	a	b	b	b	b	a	b	b	b	b	b	b	b	b	b	b	b	b	a
IWB20237	b	a	b	a	b	a	a	b	b	b	b	b	b	b	b	a	a	a	a	b	b	a	a	a	b	b	b	b	b	b	b	b	b	b	b	b	a	b	b	b	b	a	b	b	b	b	b	b	b
IWB25446	a	a	a	a	a	a	a	a	a	a	b	a	a	a	a	a	b	b	a	a	a	a	a	a	a	a	a	a	a	a	a	a	a	a	b	a	a	b	a	-	a	a	a	a	a	a	a	a	a
IWB43928	b	a	a	a	a	a	a	a	a	a	a	a	a	a	a	a	a	a	a	a	a	a	a	a	a	a	a	a	a	a	a	a	a	a	a	a	a	b	a	a	a	a	a	a	a	a	a	a	a
IWB22480	a	b	a	b	b	b	b	b	b	b	b	b	a	b	b	b	b	b	b	b	a	b	a	a	b	b	a	b	b	a	b	a	b	b	b	b	b	b	a	b	b	b	b	a	b	b	b	b	b
IWA7205	a	a	a	b	b	b	b	b	a	b	b	a	a	a	a	b	b	b	b	a	b	a	b	b	a	a	a	a	a	b	a	a	a	a	a	a	b	a	a	a	a	a	a	a	a	a	a	b	a
IWB49784	b	a	b	a	a	b	b	a	b	a	a	b	b	b	b	a	a	a	a	a	b	b	a	a	a	b	a	b	b	a	a	b	b	b	b	a	a	b	a	b	-	a	a	a	a	a	b	a	b
IWA4977	b	b	a	b	b	b	b	b	b	b	b	b	b	b	a	b	a	a	b	b	b	a	b	b	b	b	b	b	b	b	a	b	b	b	a	b	b	b	b	b	b	b	a	b	b	a	b	b	b
IWB56135	b	b	a	a	a	a	a	a	a	-	b	a	a	a	a	a	a	a	a	a	a	a	b	a	a	b	a	b	a	b	a	a	a	a	b	b	b	a	a	a	a	a	a	a	a	a	a	a	b
IWB23620	a	a	a	b	b	b	-	b	a	a	b	a	a	a	a	b	b	b	b	a	b	b	a	a	a	b	a	a	a	b	a	a	a	a	a	a	b	a	a	a	a	a	a	a	a	b	a	b	a
IWB34648	b	b	b	b	b	b	b	a	a	b	a	b	a	b	b	b	b	b	b	a	a	b	b	b	a	a	b	a	b	a	b	b	b	b	a	a	a	a	a	a	-	a	a	a	a	a	a	b	b
IWA2385	b	b	b	b	b	b	b	a	a	b	b	b	a	b	b	b	b	b	b	a	a	b	b	a	b	b	b	a	b	b	b	b	b	b	b	a	a	a	a	a	a	a	b	a	a	a	a	b	b
IWA7831	-	b	b	b	b	b	b	b	a	b	b	a	a	a	b	b	b	b	b	a	b	a	b	a	a	b	a	b	b	b	b	b	b	b	a	b	b	a	b	b	b	b	b	b	b	b	a	b	a
IWB40912	b	a	a	a	a	a	a	a	a	a	a	b	a	a	a	a	a	a	a	a	b	a	a	a	a	a	a	b	a	a	a	b	b	b	a	a	a	b	b	a	a	b	a	a	a	a	b	a	a
IWB73952	b	a	a	a	a	a	a	a	a	a	a	a	a	a	a	a	a	a	a	a	a	a	a	a	a	a	a	a	a	a	a	a	a	a	a	a	a	b	b	a	a	a	a	a	a	a	b	a	a
IWB61463	b	a	a	a	a	a	a	b	a	a	a	a	b	b	a	a	a	a	a	a	b	a	a	a	a	a	a	b	a	b	b	a	a	a	a	a	a	b	a	a	a	b	a	b	b	a	b	a	a
IWB36813	-	b	a	a	a	a	a	a	b	a	a	a	b	a	b	a	a	a	a	b	b	a	b	b	b	b	b	b	a	a	a	b	b	b	a	a	a	b	b	b	b	b	a	b	b	a	b	b	a
IWA1946	a	a	b	a	a	a	a	b	b	a	a	a	b	b	b	a	a	a	a	b	b	b	a	a	a	a	a	b	b	a	b	a	a	a	a	b	b	b	b	b	-	b	b	b	b	b	b	b	a
IWA4750	a	a	a	a	a	a	a	a	b	b	b	a	a	b	a	a	a	a	a	b	a	b	b	a	a	a	a	b	b	a	b	b	a	a	b	a	a	b	b	b	-	b	b	b	b	b	b	a	b
IWB25774	a	a	b	b	a	a	a	a	b	b	b	a	a	b	b	a	a	a	b	a	a	a	b	b	a	a	b	a	b	a	b	b	a	a	b	b	a	b	b	b	b	a	a	a	b	b	b	b	b
IWA3965	a	b	b	a	a	a	a	a	a	b	b	a	a	b	a	a	a	a	a	b	a	a	a	a	a	a	a	a	b	b	b	a	b	b	a	b	b	b	b	a	a	a	a	a	a	a	a	a	b
IWB4726	b	a	a	a	b	b	b	b	b	a	a	a	a	a	a	b	b	b	b	a	a	a	b	a	a	b	a	a	a	a	b	a	a	a	a	a	a	b	a	a	a	a	a	a	a	a	b	a	a
IWB10628	a	b	b	b	b	b	b	a	a	b	b	b	b	b	a	b	b	b	b	b	b	b	b	a	a	b	b	b	b	b	b	a	a	a	b	b	b	b	b	b	b	b	b	b	b	b	b	b	b
IWA45	b	a	b	b	b	b	b	b	b	a	a	b	b	b	b	b	b	b	b	a	a	b	a	b	b	b	b	b	b	b	b	b	b	b	a	a	a	b	a	b	b	b	b	b	b	b	b	b	a
IWB65343	b	b	a	a	a	a	a	a	a	a	a	a	a	a	a	a	a	a	a	a	b	a	a	a	a	a	a	b	a	a	a	a	a	a	b	a	a	a	b	a	a	b	a	a	a	a	a	a	a
IWA1339	b	b	b	a	b	b	b	b	a	a	a	b	b	a	b	b	b	b	b	a	a	b	b	a	a	b	a	b	b	a	b	a	a	a	b	a	a	b	b	b	b	b	b	a	a	a	a	a	b
IWB43661	b	b	a	b	b	a	a	b	a	b	a	a	b	a	b	b	b	b	b	b	a	b	b	a	a	b	a	a	b	b	b	a	b	b	a	b	a	a	a	b	a	a	b	a	a	b	b	b	a
IWB25320	b	b	b	a	a	a	a	a	a	b	b	b	b	b	a	a	a	a	a	b	b	a	b	b	b	b	b	b	b	a	b	b	b	b	a	b	b	a	b	b	b	b	b	b	b	b	b	a	b
IWA5727	a	a	a	b	b	b	b	b	b	b	b	a	b	a	a	a	b	b	b	a	a	a	b	b	b	b	b	a	a	a	a	a	a	a	b	a	b	a	a	a	a	a	a	a	a	a	a	a	a
IWB12371	a	b	a	a	b	a	a	a	a	b	b	b	a	b	a	a	a	a	a	b	a	b	b	a	a	a	b	b	b	b	b	a	a	a	b	b	b	a	a	a	a	a	a	a	a	a	a	a	b
IWB12917	a	b	b	a	a	a	a	a	b	a	a	a	a	a	a	a	a	a	a	b	b	a	a	a	a	b	a	b	a	b	b	a	a	a	a	b	a	a	a	b	b	b	b	b	b	b	a	b	b
IWB69294	b	b	b	b	b	b	b	b	b	b	b	b	b	b	b	b	b	b	b	a	a	b	b	b	b	b	b	b	b	b	b	b	b	b	b	b	b	b	a	b	b	b	b	b	b	b	a	b	b
IWB59447	b	a	a	a	a	a	a	a	a	a	a	a	a	a	a	a	a	a	a	b	a	a	a	a	a	a	a	b	a	a	a	b	b	b	a	a	a	a	b	a	a	b	a	b	b	-	a	a	a
IWB34950	a	a	a	a	a	a	a	b	b	a	a	a	b	a	a	a	a	a	a	b	b	a	b	b	b	a	a	b	a	a	b	a	a	a	a	b	b	b	b	b	-	b	b	b	b	b	b	a	b
IWB56849	b	b	a	a	b	b	b	b	b	b	b	b	b	b	b	b	b	b	b	a	b	a	a	b	b	b	b	a	a	b	a	a	a	a	a	b	b	b	a	a	a	a	a	a	a	b	b	b	b
IWB74669	b	b	b	a	a	a	a	a	b	a	a	b	a	b	a	a	a	a	a	a	a	a	b	b	b	a	b	b	b	a	b	a	a	a	b	a	a	b	a	a	a	-	a	a	a	a	b	a	b
IWB73443	b	b	b	b	b	b	b	b	b	b	b	b	b	b	b	b	b	b	b	a	b	b	b	b	b	a	b	a	b	b	b	b	b	b	b	a	a	b	a	b	b	b	b	a	a	b	b	b	b
IWB68737	a	a	b	a	a	a	a	a	a	a	a	a	a	b	a	b	a	a	a	b	a	b	a	a	b	a	a	a	a	a	a	a	b	a	a	a	b	b	a	a	a	a	a	b	a	a	a	a	b
IWB9427	b	a	a	a	a	b	b	a	b	b	b	b	b	b	b	a	b	b	b	b	b	b	a	a	-	a	a	b	b	-	a	b	b	b	a	b	b	b	b	b	b	b	a	b	b	b	b	a	b
IWA5597	b	a	b	a	a	a	a	a	a	a	b	b	b	b	b	a	a	a	b	b	b	b	b	b	b	b	b	b	b	a	b	b	b	b	a	b	b	b	b	b	b	b	b	b	b	b	b	b	b
IWB57926	b	b	a	b	a	a	a	a	a	a	a	a	a	a	a	a	a	a	b	a	a	a	a	a	a	b	a	a	a	a	a	b	a	a	a	a	b	a	a	a	a	b	a	b	a	a	a	b	a
IWB713	a	a	b	b	b	a	b	b	a	a	a	a	a	a	a	b	b	b	b	b	a	b	b	b	b	a	b	a	b	a	b	a	a	a	b	a	a	b	a	a	-	b	a	a	a	a	a	b	b
IWB61302	b	a	a	b	b	b	b	b	a	b	a	a	b	a	a	b	a	a	b	b	b	a	a	a	a	a	a	a	a	b	a	b	b	b	a	b	a	b	b	b	b	b	b	b	b	b	b	a	b
IWB22436	b	b	a	a	a	b	b	b	b	b	b	b	b	a	a	a	a	a	b	a	b	a	b	b	-	b	a	a	b	b	b	a	a	a	b	b	b	b	b	b	a	b	b	b	b	b	b	b	b
IWA6680	a	b	a	a	a	a	a	a	a	a	a	a	a	a	a	a	a	a	a	b	a	b	a	a	a	b	a	b	b	a	a	b	b	b	a	a	a	a	a	a	a	a	a	a	a	a	a	a	b
IWB49667	b	a	a	a	a	a	a	a	a	a	a	a	a	a	a	a	a	a	a	a	a	a	a	a	a	a	a	a	a	a	a	a	a	a	a	a	a	a	a	a	a	a	a	a	a	a	a	b	a
IWB50294	b	a	a	a	b	a	b	a	a	a	a	a	a	b	a	a	a	a	b	a	a	a	a	a	a	a	b	b	a	a	a	a	a	a	a	b	a	a	a	b	b	b	b	b	b	b	a	a	b
IWB51234	b	b	b	b	b	b	b	b	b	b	b	a	a	a	b	b	a	a	b	a	b	a	b	b	b	a	b	b	a	a	b	b	b	b	b	a	a	a	b	b	b	b	a	b	b	a	b	a	b
IWB26212	a	b	b	b	b	b	b	b	b	b	b	b	b	b	b	b	b	b	b	b	b	b	a	b	b	b	b	b	b	b	b	-	b	b	b	b	b	b	b	b	b	b	b	b	b	b	b	b	b
IWB73584	a	b	b	b	b	b	b	b	b	b	b	b	b	b	b	b	b	b	b	b	b	b	b	b	b	b	b	a	b	b	b	b	b	b	b	b	b	b	a	b	b	b	b	b	a	b	b	b	b
IWB24000	a	a	a	a	a	a	a	a	a	a	a	a	a	a	a	a	a	a	a	a	a	b	a	a	a	-	a	a	a	b	a	a	b	b	b	a	a	b	a	b	b	b	a	b	b	b	b	a	a
IWB30251	a	a	a	b	b	a	a	b	a	a	a	a	b	b	b	b	b	b	b	b	b	a	b	b	b	b	b	b	b	a	b	b	b	b	a	b	b	a	b	b	b	b	b	b	b	b	b	b	b
IWB9335	b	a	a	b	b	b	b	b	b	b	b	a	b	b	a	b	b	b	b	a	a	b	b	a	b	b	b	a	b	a	b	b	b	b	b	a	b	a	b	b	a	b	b	b	b	b	a	b	b
IWA6835	b	b	a	b	b	b	b	b	b	b	b	b	b	b	a	b	b	b	b	b	b	b	b	b	b	b	b	b	b	a	b	a	a	a	b	b	b	b	b	b	b	b	b	b	b	b	b	b	a
IWB29244	a	b	a	a	a	a	a	a	a	b	b	a	b	a	a	a	a	a	a	a	b	b	a	a	a	a	a	b	a	b	a	a	b	b	a	a	a	b	b	b	b	b	a	b	a	a	b	a	a
IWB65684	b	a	a	b	b	a	a	b	a	b	b	a	a	a	a	b	b	b	b	a	a	a	a	a	a	a	a	b	a	a	a	a	a	a	a	a	a	b	a	b	b	a	b	b	b	b	a	a	a
IWB38172	a	b	a	a	a	a	a	b	b	b	b	a	a	a	a	a	a	a	a	a	b	b	b	a	a	b	b	b	a	b	a	a	a	a	b	b	b	a	b	b	b	b	a	b	b	b	b	b	b
IWB9607	a	a	b	a	a	a	a	a	a	a	a	a	a	a	b	a	a	a	a	a	b	a	a	a	a	a	a	a	a	b	a	b	b	b	a	b	a	a	b	a	b	a	a	b	b	b	b	a	b
IWB52480	b	b	b	b	b	b	b	b	a	b	b	b	a	b	b	b	b	b	b	b	b	a	a	a	-	b	b	a	a	-	b	b	b	b	a	a	a	a	a	b	b	a	b	b	a	b	a	b	a
IWB63352	-	a	b	a	a	b	b	a	a	a	a	b	a	b	b	a	a	a	a	a	a	b	a	a	a	b	a	a	b	a	a	a	a	a	b	a	a	a	a	a	a	a	a	a	a	a	a	b	b
IWB21564	a	a	b	a	a	a	a	a	a	a	a	a	a	a	b	a	a	a	a	a	a	a	a	a	a	a	a	a	a	b	a	b	b	b	a	a	a	a	a	a	a	a	a	a	a	a	a	a	b
IWB60913	b	b	b	a	a	a	a	a	b	a	a	b	a	b	b	a	a	a	a	b	a	b	b	b	b	b	b	b	b	b	a	b	b	b	b	b	a	a	a	a	a	a	a	a	a	a	a	b	b
IWA2656	b	a	b	b	b	b	b	a	a	b	a	b	a	a	a	b	b	b	b	a	b	a	a	a	a	a	a	a	b	a	a	a	a	a	a	a	a	a	a	a	a	a	a	a	a	a	a	a	a
IWB53469	b	b	b	b	b	b	b	b	b	a	a	a	b	a	a	b	b	b	b	b	a	b	b	b	a	a	b	b	b	a	b	b	b	b	a	b	b	a	b	b	b	a	b	b	b	b	b	b	a
IWB56393	b	b	b	a	a	b	b	a	a	a	a	b	b	b	b	a	a	a	a	b	b	b	a	b	b	b	a	b	b	b	a	b	b	b	b	a	a	b	-	b	b	b	b	b	b	b	b	b	b
IWB7684	a	b	b	b	b	b	b	b	b	b	b	b	b	a	b	b	b	b	b	b	a	b	b	a	-	b	b	b	b	-	b	a	a	a	b	b	b	b	b	a	b	a	a	a	b	b	b	b	b
IWB7523	-	b	a	b	b	b	b	a	b	b	a	a	a	b	b	b	b	b	b	b	a	a	a	a	a	a	a	b	b	a	a	b	b	b	a	a	a	a	a	b	b	a	a	b	b	a	a	b	b
IWB29684	b	b	b	b	b	b	a	b	b	b	b	b	b	b	b	b	b	b	b	b	b	b	b	b	b	b	b	a	b	b	b	a	a	b	b	a	b	b	b	a	a	b	b	a	b	-	b	b	b
IWB7470	b	b	-	a	a	b	b	a	a	a	b	a	a	b	a	a	a	a	a	a	a	b	a	b	b	a	a	a	a	b	b	a	a	a	b	a	a	a	a	-	a	a	a	a	a	a	a	b	b
IWB631	a	a	a	a	a	a	a	a	a	b	a	a	a	a	a	a	a	a	a	b	a	a	a	a	-	b	b	a	a	-	a	a	a	a	b	a	a	a	a	a	a	a	a	a	a	b	a	a	a
IWB29387	b	b	a	a	a	a	a	a	b	a	b	a	b	b	b	b	a	a	b	b	b	a	b	a	b	b	b	b	b	b	b	a	a	a	b	a	b	b	b	b	b	b	b	b	b	b	b	b	b
IWB6947	a	a	a	a	a	b	b	a	a	a	b	b	b	a	a	a	a	a	a	a	a	a	b	b	a	a	a	a	a	a	b	a	a	a	a	a	a	a	a	a	a	a	a	b	a	a	a	a	a
IWB35459	b	a	b	b	b	a	a	a	a	b	a	b	a	b	a	b	b	b	b	b	b	b	a	a	a	a	b	a	b	a	a	b	a	a	b	a	a	a	b	b	b	b	a	b	b	b	a	a	a
IWB38561	b	b	b	b	b	b	b	a	b	b	a	b	b	b	b	b	b	b	b	b	b	a	b	b	b	b	b	b	b	a	a	b	b	b	b	b	a	b	b	b	b	b	b	b	b	b	b	b	a
IWB5889	a	a	b	a	a	b	b	a	a	b	b	b	a	a	a	a	a	a	a	a	a	a	a	b	b	a	a	a	a	a	a	a	a	a	a	a	a	a	a	b	a	a	a	a	a	a	a	a	a
IWB24465	a	-	b	b	b	b	b	b	b	b	b	b	b	a	a	a	b	b	b	b	a	b	b	b	b	b	b	b	b	b	b	b	b	b	b	b	b	a	a	b	b	b	b	a	b	a	a	b	b
IWB54333	b	a	b	b	b	b	b	b	a	b	b	b	b	b	b	b	b	b	b	b	a	b	b	a	a	b	b	b	b	a	b	b	b	b	b	b	b	b	b	b	b	b	b	b	b	-	b	a	b
IWB13106	b	a	b	a	a	a	a	a	b	a	a	b	b	a	b	a	a	a	a	a	b	a	a	a	a	a	a	b	a	a	a	b	b	b	a	b	a	a	a	a	a	a	b	a	a	a	a	b	a
IWB20313	b	a	b	b	b	b	b	b	a	a	b	b	a	b	b	b	b	b	b	a	b	a	b	b	b	a	a	a	b	b	a	b	b	b	a	b	a	a	b	b	b	a	b	b	b	a	a	b	a
IWB41626	-	a	b	b	b	b	b	b	b	b	b	b	b	b	b	b	b	b	b	b	b	b	b	b	b	a	b	b	b	b	b	a	a	b	b	b	b	a	b	b	b	a	a	a	b	a	b	b	b
IWA3661	b	b	b	b	b	b	b	b	b	b	b	b	-	a	a	b	b	b	b	b	b	a	b	b	b	b	b	a	a	b	a	b	b	b	b	b	b	a	a	a	a	b	a	a	a	b	a	b	a
IWB46397	a	b	b	b	b	b	b	b	b	b	b	b	b	b	b	b	b	b	b	b	b	b	b	b	b	b	b	b	b	b	b	b	b	b	b	b	b	b	b	b	b	b	b	b	b	b	b	b	b
IWA3520	b	a	b	a	a	b	b	a	b	b	a	b	b	b	b	a	a	a	a	a	a	a	b	b	b	b	b	a	a	a	b	b	b	b	b	b	b	a	a	a	a	a	b	a	a	a	b	a	b
IWB59321	-	a	b	a	a	b	b	b	a	a	a	b	a	a	b	b	a	a	a	b	a	b	a	a	b	a	a	b	b	a	b	b	b	b	b	b	b	b	a	a	a	b	b	a	a	a	a	b	b
IWB55506	a	b	b	b	b	a	a	a	b	b	b	b	b	b	b	b	a	a	b	b	b	b	b	b	b	b	b	a	b	b	a	b	b	b	b	b	b	a	a	a	a	a	b	a	a	a	a	b	b
IWA4720	a	a	b	a	b	b	b	a	b	b	a	b	b	b	b	a	a	a	b	b	b	a	b	b	a	a	b	b	a	b	b	b	b	b	b	b	b	a	a	a	a	a	a	a	a	a	a	b	b
IWB6330	b	b	a	b	b	b	b	b	b	b	b	a	a	b	a	b	b	b	b	a	a	a	b	a	a	b	b	a	a	a	b	a	a	a	b	a	b	a	a	a	a	b	a	b	a	b	a	a	b
IWB64813	a	a	b	a	a	a	a	b	a	a	a	a	a	a	b	a	a	a	a	b	a	b	a	b	b	a	b	a	b	a	a	a	a	a	b	b	b	b	a	a	a	a	b	a	a	b	a	b	b
IWB7597	b	b	a	a	a	b	b	b	a	b	b	a	a	b	b	a	a	a	a	a	a	a	b	b	b	a	b	a	b	b	a	a	a	a	b	b	b	a	a	a	a	a	a	a	a	a	a	b	a
IWA4642	a	a	b	a	b	b	b	a	b	b	a	b	a	b	a	a	a	a	b	b	b	a	b	b	a	a	b	a	a	b	b	b	b	b	b	b	b	a	a	a	a	a	a	a	a	a	a	b	b
IWB23121	b	b	a	a	a	a	a	a	b	a	a	a	b	b	a	a	a	a	a	b	a	a	b	b	a	b	a	a	b	b	b	a	a	a	a	b	b	a	a	b	b	a	a	a	b	a	b	a	a
IWB65792	b	b	b	b	b	b	b	b	a	b	b	b	a	a	b	b	b	b	b	b	b	b	b	b	b	a	b	b	b	b	b	b	b	b	b	b	b	b	b	b	b	b	b	b	b	b	b	b	b
IWA8195	a	a	a	b	b	b	b	b	a	b	b	b	a	a	a	b	b	b	b	a	b	b	b	b	b	b	a	a	a	b	a	b	b	b	a	b	b	b	a	a	a	a	a	b	a	a	a	a	a
IWB56398	-	b	a	a	b	a	a	b	b	b	b	a	b	b	a	a	a	a	a	a	b	b	b	b	b	b	a	b	b	b	b	b	b	b	a	b	b	a	b	b	b	b	a	b	b	b	b	a	a
IWB35179	a	b	a	b	a	b	b	b	a	a	a	a	a	a	a	b	b	b	b	a	a	b	a	b	b	b	a	a	a	a	a	a	a	a	a	b	b	a	a	a	a	a	a	a	a	a	a	a	a
IWA1917	b	b	b	a	b	b	b	b	b	b	b	a	b	a	b	b	b	b	b	a	b	b	a	b	b	b	b	a	a	b	b	a	a	a	b	b	b	b	a	a	a	b	b	a	b	b	b	b	b
IWA1413	a	a	b	a	a	a	a	a	b	b	b	a	a	a	b	a	a	a	a	b	a	a	a	b	a	a	b	b	a	a	b	a	a	a	a	a	b	a	a	a	a	a	b	a	a	b	a	b	b
IWB62759	b	a	b	b	b	b	b	b	b	b	b	b	b	b	b	b	b	b	b	b	b	b	b	b	b	b	b	b	b	b	b	b	b	b	a	b	b	b	b	b	b	b	b	b	b	b	b	b	b
IWB28203	a	a	a	a	a	a	a	a	a	a	a	a	a	a	a	a	a	a	a	a	a	a	a	a	a	a	a	b	a	a	a	a	a	a	a	a	a	a	a	b	b	a	a	a	a	a	a	a	a
IWB24835	b	b	a	b	b	b	b	b	a	a	a	b	b	b	a	b	b	b	b	a	b	b	b	a	b	b	a	b	b	b	b	b	b	b	b	b	a	b	b	b	b	b	a	b	b	a	b	a	a
IWB9754	b	b	a	a	a	a	a	a	a	b	a	b	b	b	a	a	a	a	a	a	a	b	a	a	b	b	a	b	b	b	b	b	b	b	b	b	a	b	b	b	b	b	a	b	b	a	b	a	a
IWA5574	b	b	b	a	a	b	b	b	b	a	a	b	b	b	a	a	a	a	a	a	b	a	a	b	b	a	a	b	a	a	a	a	a	a	a	b	b	b	a	a	a	a	b	a	a	a	a	a	b
IWB23436	a	a	a	a	a	a	a	a	a	a	a	a	a	a	a	a	a	a	a	a	a	a	a	a	a	a	a	a	a	a	a	b	b	b	a	b	a	a	a	a	a	a	a	a	a	a	a	a	a
IWA4989	a	b	a	b	b	b	b	b	b	a	b	a	a	b	b	b	b	b	b	b	a	a	b	b	b	b	a	a	a	a	a	a	a	a	a	a	a	a	a	a	b	a	a	a	a	a	b	a	a
IWB11078	b	a	a	a	a	b	b	a	a	b	a	b	b	b	a	a	b	b	b	a	a	a	a	a	a	b	a	a	a	b	a	b	b	b	a	a	a	a	a	a	a	a	a	a	a	a	a	a	a
IWB30421	b	b	a	b	b	b	b	b	a	b	b	a	a	a	a	b	b	b	b	a	a	b	a	a	a	a	a	b	a	b	b	a	a	a	b	a	a	b	b	b	b	b	a	a	b	a	b	a	b
IWA3248	-	a	b	a	a	b	b	b	b	b	a	a	b	b	b	a	b	b	b	a	a	b	a	b	a	a	b	b	a	b	a	b	b	b	b	b	a	a	a	a	a	a	a	a	a	a	a	a	a
IWB49915	b	a	b	a	a	a	a	a	a	a	a	a	a	a	a	a	a	a	a	a	a	a	a	b	b	b	b	a	a	b	a	a	a	a	a	a	a	a	a	a	a	a	a	a	a	a	a	a	a
IWA6656	b	a	a	a	a	a	a	a	b	a	b	a	a	a	a	a	a	a	a	a	a	a	a	a	a	a	a	a	a	a	a	a	a	a	a	a	a	a	a	a	a	a	a	a	a	a	a	a	a
IWA2874	-	a	a	b	b	b	b	a	b	a	a	a	a	b	a	b	b	b	b	b	b	a	a	a	a	a	a	b	b	a	a	b	b	b	b	a	a	a	a	a	a	a	b	a	a	a	a	b	b
IWA7418	b	b	b	b	b	a	a	a	a	a	b	b	a	a	a	b	a	a	a	b	b	a	b	a	b	b	a	a	b	a	b	a	a	a	a	a	b	b	b	b	b	b	b	b	b	b	b	b	b
IWB45672	a	a	a	a	a	b	b	a	a	a	a	a	a	a	a	a	a	a	a	b	a	a	a	b	a	a	b	a	a	a	a	a	a	a	a	b	b	a	b	a	a	a	a	a	a	a	a	b	b
IWB61142	b	b	a	b	b	b	b	a	a	b	b	b	a	a	a	b	b	b	b	a	a	a	a	a	b	a	a	a	a	a	a	a	a	a	b	a	b	b	a	a	a	a	b	a	a	b	a	a	a
IWB41241	a	b	b	a	a	a	a	a	a	a	a	a	a	a	b	a	a	a	a	b	a	b	a	b	b	b	b	b	a	a	b	a	a	a	b	b	b	b	b	b	b	b	b	b	b	b	b	b	b
IWB64569	b	b	a	a	a	a	a	a	b	a	a	a	a	a	a	a	a	a	a	a	a	a	a	a	b	b	a	a	a	a	a	b	b	b	a	a	a	a	b	a	a	a	a	a	a	a	a	a	a
IWB25230	b	b	a	a	a	b	b	a	b	a	a	a	a	a	a	a	a	a	a	b	b	b	a	a	b	a	a	b	a	a	b	b	b	b	b	b	b	a	b	b	b	b	a	b	a	b	b	a	b
IWB22135	b	a	a	a	b	b	b	b	a	b	b	b	b	a	b	b	b	b	a	a	a	b	b	b	b	b	b	a	a	b	b	a	a	a	a	b	b	a	a	a	a	a	b	a	a	a	b	a	b
IWB32069	b	b	b	a	b	b	b	a	a	a	a	b	b	b	b	a	a	a	b	b	b	a	a	a	a	a	b	b	b	a	b	b	b	b	a	b	a	b	a	a	a	b	a	b	a	b	b	b	a
IWB72976	b	a	a	b	b	a	a	b	a	a	a	a	b	b	a	a	a	a	b	a	a	b	b	b	b	a	a	a	b	a	a	a	a	a	a	b	b	a	a	a	a	a	a	a	a	a	a	a	a
IWB41859	b	b	b	b	b	b	b	b	b	b	b	a	a	a	b	b	b	b	b	b	b	b	b	a	a	b	b	a	b	b	b	a	a	a	b	b	b	b	b	b	a	b	b	b	a	b	a	b	b
IWA4075	a	b	a	a	a	a	a	a	b	a	b	a	b	a	a	a	a	a	a	a	a	b	b	a	b	a	a	a	b	b	b	b	a	a	b	a	b	a	a	a	a	a	a	a	a	a	a	a	a
IWB53846	b	a	a	a	b	a	a	b	a	a	a	b	b	b	b	b	a	a	a	b	b	b	b	b	b	b	a	b	b	a	b	b	b	b	b	b	b	b	b	b	b	b	a	b	b	b	b	a	b
IWB27192	a	a	a	a	a	a	a	a	a	a	a	a	a	a	a	a	a	a	a	a	a	a	a	a	a	a	a	a	a	a	a	a	a	a	a	a	a	a	b	b	b	b	a	a	a	a	a	a	a
IWB61607	b	b	b	a	b	b	b	b	-	b	b	b	b	b	b	b	a	a	b	b	b	b	b	b	b	b	a	b	b	b	b	b	b	b	b	b	b	b	b	b	b	b	b	b	b	b	b	b	b
IWB49970	b	a	b	b	a	b	b	b	a	b	b	a	b	b	b	a	b	b	b	a	a	a	a	a	b	a	b	a	a	b	a	a	a	a	a	a	a	a	b	b	b	b	a	a	a	a	b	a	a
IWB3644	a	a	b	b	b	b	b	b	b	a	a	b	b	b	b	b	b	b	b	b	b	a	b	b	a	b	a	b	b	a	b	a	a	a	a	a	b	b	b	b	b	b	a	b	b	b	b	b	b
IWB57035	a	b	a	a	a	a	a	b	b	b	b	a	b	a	b	b	b	b	a	a	a	a	a	a	a	b	b	a	a	a	a	a	a	a	b	b	b	a	a	a	a	a	a	a	a	a	b	a	b
IWB13339	-	b	a	b	b	b	b	b	b	b	b	b	b	b	a	b	a	a	b	a	b	a	b	b	b	a	a	b	a	a	a	a	a	a	b	b	a	a	b	b	b	b	b	b	b	b	b	a	b
IWA4310	b	b	a	b	b	a	a	a	a	b	b	a	a	a	a	b	b	b	b	b	b	a	b	a	a	a	a	b	a	a	b	b	b	b	b	b	b	a	b	b	b	b	a	b	b	b	b	b	b
IWB8114	a	a	b	b	b	a	a	a	a	a	b	b	b	a	b	b	b	b	b	a	b	b	a	b	b	a	b	a	a	a	a	b	b	b	a	b	b	b	b	b	b	b	a	b	b	b	b	b	b
IWB9529	-	a	b	a	a	a	a	a	a	a	a	a	a	a	b	a	a	a	a	a	a	a	a	a	a	a	a	a	a	a	a	b	b	b	a	a	a	a	a	a	a	a	a	a	a	b	a	a	a
IWB18684	a	b	b	a	a	b	b	b	b	b	a	b	b	b	b	b	b	b	b	a	b	b	b	b	b	b	b	a	b	a	b	b	b	b	b	a	b	a	a	a	a	a	b	a	a	b	b	b	b
IWB2769	b	a	a	a	a	a	a	a	a	a	a	a	a	a	a	a	a	a	a	b	a	a	a	a	a	a	a	b	a	a	a	a	a	a	a	a	a	a	a	b	a	b	a	b	b	b	b	a	a
IWB35234	b	b	a	b	b	b	b	a	a	a	a	a	b	a	b	b	b	b	b	b	a	b	a	a	a	b	a	b	a	b	a	a	a	a	b	b	a	b	b	b	b	b	b	b	b	b	b	b	a
IWB72136	b	a	a	a	a	a	a	a	a	a	a	b	b	a	a	a	a	a	a	a	b	a	a	b	a	a	a	b	a	a	b	a	a	a	a	-	b	b	b	a	a	b	a	a	b	a	a	a	b
IWB27973	-	a	b	a	a	a	a	a	a	b	b	a	a	b	b	a	b	b	a	b	a	b	a	b	b	b	b	a	b	b	a	a	a	a	a	a	b	b	a	a	a	a	a	a	a	a	a	b	a
IWB2802	a	b	b	a	a	a	a	a	a	b	b	b	b	a	a	a	a	a	a	b	b	b	b	b	a	a	a	b	a	a	b	b	b	b	b	a	b	a	b	a	a	a	a	a	a	b	a	a	b
IWB45321	b	b	b	b	b	b	b	b	b	b	b	b	b	b	b	b	b	b	b	b	b	b	b	b	b	b	b	b	b	b	b	b	b	b	b	b	b	b	a	a	a	a	b	b	b	b	b	b	b
IWB29059	-	b	a	b	a	a	a	a	a	a	a	a	a	b	a	a	a	a	b	a	a	b	a	a	b	a	b	b	b	a	b	b	a	a	a	a	a	b	b	b	b	b	b	a	b	a	a	a	b
IWA8059	b	a	a	b	b	a	a	a	a	a	b	a	a	a	a	a	a	a	a	b	a	a	a	a	a	a	a	b	a	b	a	a	a	a	a	b	a	b	b	b	b	b	a	b	b	a	a	a	a
IWB67653	-	a	a	a	b	a	a	b	b	a	a	b	b	a	a	b	b	b	a	a	a	a	a	a	a	a	b	b	b	a	a	a	b	b	a	b	a	a	b	b	b	b	a	a	a	a	b	a	a
IWB24723	b	a	b	b	b	b	b	a	a	a	a	b	a	b	b	b	b	b	b	a	b	a	a	b	b	b	b	b	b	b	a	b	b	b	a	b	a	b	b	b	b	b	b	b	b	b	a	a	b
IWB43889	b	a	a	b	b	b	b	b	b	b	b	b	a	b	b	b	a	a	b	b	b	a	a	a	b	b	a	a	a	b	b	b	a	a	a	a	a	a	a	a	a	a	a	a	a	a	a	b	a
IWA7114	b	b	b	b	b	b	b	a	b	b	b	b	a	a	b	b	b	b	b	a	b	b	b	a	b	b	a	a	b	b	b	b	b	b	b	a	b	a	a	a	a	a	a	b	a	b	a	a	a
IWB26756	b	b	a	b	a	a	a	a	a	b	b	a	a	a	a	b	b	b	a	b	b	a	b	a	a	a	b	b	a	a	b	b	b	b	b	a	b	a	b	b	b	b	a	b	b	b	b	a	b
IWB53148	b	b	b	a	a	a	a	b	b	a	a	a	b	a	a	a	a	a	a	a	b	a	b	b	b	b	a	a	a	b	a	b	b	b	b	a	a	b	b	b	b	a	b	b	b	b	b	a	b
IWB3107	b	b	b	b	b	b	b	b	b	b	b	a	b	a	a	b	b	b	b	b	b	b	b	a	b	a	b	b	a	a	b	b	b	b	b	b	b	a	a	b	a	a	b	b	b	a	b	b	a
IWB27582	b	a	a	a	a	a	a	b	b	a	a	a	a	a	a	a	a	a	b	a	b	a	a	a	b	b	b	a	b	b	a	a	a	a	a	b	a	b	b	b	b	b	a	b	b	b	b	a	a
IWB64860	b	a	b	b	b	b	b	b	a	b	b	a	a	a	b	b	b	b	a	b	b	b	a	a	b	b	a	b	a	b	a	b	a	a	a	a	a	a	b	b	b	b	b	a	a	a	a	a	a
IWB50625	a	a	a	b	b	b	b	b	b	b	b	b	b	b	b	b	b	b	b	a	b	a	b	b	b	b	b	a	b	a	b	a	a	a	a	b	b	a	b	b	b	b	b	a	b	b	b	b	b
IWB7789	b	a	b	b	b	a	a	a	a	a	b	a	b	b	b	b	b	-	b	a	b	b	b	a	b	a	b	b	b	a	a	b	b	b	b	b	a	a	a	b	b	b	b	a	b	a	a	b	a
IWB54873	b	a	b	b	b	a	b	b	a	b	b	b	a	b	b	b	b	b	b	b	a	a	a	b	b	a	b	b	b	b	a	b	b	b	a	b	a	a	b	b	b	b	b	a	b	b	b	b	b
IWB57994	b	b	b	b	b	b	b	b	b	b	b	b	b	b	b	b	b	b	b	b	b	a	b	b	a	b	b	b	a	b	b	b	b	b	b	a	b	b	b	b	-	b	b	b	b	b	b	b	b
IWB10667	a	a	a	a	b	b	b	a	a	b	b	a	a	b	a	a	a	a	a	a	a	a	a	a	a	a	b	a	a	a	a	b	b	b	a	a	b	a	a	a	a	a	a	a	a	a	a	a	b
IWB34605	b	b	b	b	b	b	b	b	b	b	b	a	b	b	b	b	b	b	b	b	b	b	b	b	a	a	a	b	a	a	b	b	b	b	a	b	b	b	b	b	b	b	b	b	b	b	b	a	b
IWB11839	b	a	a	a	a	a	a	a	a	a	a	a	a	a	a	a	a	a	a	a	a	a	a	b	a	a	b	a	a	a	a	b	b	b	a	a	b	a	a	a	a	a	a	a	a	a	a	a	a
IWB26975	b	a	a	b	a	b	a	a	b	b	b	a	a	b	a	b	b	b	b	a	a	a	a	a	a	b	a	a	a	a	a	a	b	b	b	a	b	b	a	a	a	a	a	a	a	b	a	a	a
IWB7822	a	b	b	b	b	b	b	b	b	b	b	a	a	a	b	b	b	b	b	b	b	a	b	a	b	a	b	b	b	b	b	a	a	a	b	b	a	b	b	b	b	b	b	b	b	b	b	b	a
IWB34384	a	b	a	b	b	b	b	b	b	b	b	b	b	b	b	b	b	b	b	a	b	-	b	b	b	b	b	a	a	a	b	a	a	a	a	b	b	a	b	a	b	b	a	b	b	b	b	b	b
IWB66942	-	b	b	b	b	b	b	b	b	b	b	b	b	b	b	b	b	b	b	b	a	b	b	a	b	b	b	b	b	a	a	a	a	a	b	b	b	b	b	b	b	a	b	b	b	b	b	b	b
IWB73485	a	a	b	a	a	b	b	a	b	b	b	b	b	a	b	a	a	a	a	b	b	b	b	a	a	b	b	a	a	b	a	b	b	b	b	a	b	b	b	b	b	b	b	b	b	b	b	b	b
IWB55798	b	b	b	b	b	a	a	b	a	a	a	a	a	b	b	b	b	b	a	a	a	a	a	a	b	b	a	b	b	a	b	b	b	b	a	b	a	b	b	b	b	b	b	b	b	a	b	b	a
IWA6418	b	a	b	a	a	a	a	b	a	b	b	b	a	a	a	a	a	a	a	b	a	b	a	a	b	a	b	a	a	a	b	a	a	a	b	a	a	b	a	a	a	a	a	a	a	a	a	a	a
IWA126	-	b	a	b	b	b	b	b	b	b	b	b	b	b	b	b	b	b	b	b	b	b	b	b	b	b	b	b	b	b	b	b	a	a	b	b	b	b	b	b	b	b	b	b	b	b	b	b	b
IWB37755	a	b	a	b	b	b	b	a	b	b	b	b	b	b	b	b	b	b	b	b	b	b	b	b	b	a	b	b	b	b	b	b	b	b	b	b	b	b	b	b	b	b	b	b	b	b	b	b	b
IWB6060	b	b	a	a	b	a	a	b	a	a	a	a	b	b	b	a	a	a	a	b	b	b	a	a	a	b	a	b	b	b	a	b	b	b	b	b	a	b	b	b	b	b	a	b	b	b	b	a	a
IWA4651	b	a	a	b	b	b	b	b	a	a	a	b	b	b	b	b	b	b	b	b	b	a	b	a	a	a	a	b	b	b	a	b	b	b	b	b	a	b	b	b	b	b	b	b	b	b	b	b	b
IWB42370	a	a	a	b	b	a	a	b	a	a	a	b	b	b	a	b	b	b	b	b	b	a	a	a	a	a	a	b	b	a	b	b	b	b	a	b	a	a	a	a	a	a	a	a	a	a	a	a	b
IWA1066	b	a	a	b	b	b	b	b	a	a	a	b	b	b	a	b	b	b	b	b	b	a	b	a	b	a	a	b	b	b	b	b	b	b	b	b	a	b	a	a	a	a	a	a	a	a	a	a	b
IWB47902	a	a	a	a	a	a	a	a	a	a	a	a	b	a	a	a	a	a	a	a	a	a	b	a	b	a	a	a	a	b	b	a	a	a	a	a	b	a	a	a	a	a	a	a	a	a	a	a	a
IWA5365	b	a	b	b	b	a	a	b	a	b	a	a	a	b	b	b	b	b	b	b	b	b	a	b	b	b	a	b	b	b	b	a	a	a	a	b	a	a	b	a	b	b	-	b	b	b	b	b	b
IWB66546	b	a	a	a	a	b	b	a	a	a	a	a	a	a	a	a	a	a	a	a	a	a	a	a	a	a	a	a	a	b	a	a	a	a	a	a	a	a	a	a	a	a	a	a	a	a	a	a	a
IWB52694	b	b	b	b	b	b	b	a	b	b	b	b	a	a	b	b	b	b	b	b	b	b	a	a	b	b	b	b	b	b	a	b	b	b	b	b	b	b	b	b	b	b	b	b	a	b	a	b	b
IWA1992	b	b	b	a	b	a	a	a	a	a	a	b	a	a	b	b	b	b	a	a	b	b	a	a	b	b	b	a	b	a	a	b	b	b	b	b	a	b	b	b	a	a	b	a	b	a	a	a	b
IWB65668	b	b	b	a	b	a	a	b	b	a	b	b	a	a	b	a	a	a	a	b	b	b	b	a	a	b	b	b	b	b	b	a	a	a	b	b	b	b	a	a	a	b	b	a	a	b	b	b	b
IWA506	a	a	b	b	b	b	b	b	b	b	b	b	a	a	b	b	b	b	b	b	b	b	b	a	b	a	a	b	b	-	a	a	a	a	b	b	b	b	b	b	b	b	b	b	b	a	b	a	a
IWB37183	b	a	b	a	a	a	a	a	a	a	a	a	a	a	a	a	a	a	a	a	b	b	a	a	a	a	a	a	a	a	b	a	a	a	a	a	a	a	a	b	b	b	b	b	b	a	b	a	a
IWB17081	b	a	a	a	a	a	a	a	a	-	a	a	a	a	a	a	a	a	a	a	a	b	a	a	b	a	a	a	a	a	a	a	a	a	a	a	a	b	a	a	a	a	b	a	a	a	a	a	a
IWB72612	b	a	a	a	a	a	a	a	a	a	a	b	b	b	a	a	a	a	a	a	a	b	a	b	a	b	a	a	a	a	a	b	b	b	a	a	b	a	a	a	a	a	a	a	a	a	a	a	b
IWB60157	b	b	a	b	a	b	b	a	a	b	b	a	b	b	a	a	a	a	a	b	b	a	a	b	a	a	a	b	b	b	a	b	b	b	b	a	b	b	b	b	b	b	a	b	b	b	b	a	a
IWB37150	b	b	b	a	b	b	b	b	a	-	b	b	b	b	b	b	b	b	b	b	b	b	a	b	b	a	b	b	a	b	b	b	b	b	b	a	b	b	b	b	b	b	b	b	b	b	b	b	b
IWB38214	b	b	b	b	b	a	a	a	b	a	a	a	b	b	a	a	b	b	b	a	b	b	b	b	a	b	a	a	b	b	b	a	a	a	b	a	a	b	b	b	b	b	a	b	b	b	b	b	a
IWB8085	a	b	b	b	b	b	b	b	b	b	a	b	b	b	b	b	b	b	b	b	b	b	b	b	b	b	b	b	b	b	b	a	a	a	b	b	b	a	b	b	b	b	b	b	b	b	b	b	a
IWA7668	a	b	a	a	a	a	b	a	b	b	a	a	b	a	a	a	a	a	a	a	b	b	a	b	b	a	b	b	b	a	a	a	a	a	b	a	a	b	b	b	b	b	a	b	b	b	b	b	b
IWB5915	-	a	a	b	a	a	a	a	a	a	a	a	a	a	a	a	b	b	b	a	a	b	b	a	a	a	a	a	a	a	b	a	a	a	a	a	a	b	a	a	a	a	a	a	a	a	a	a	a
IWA2934	b	b	b	a	b	a	a	b	b	a	b	a	b	b	b	b	b	b	b	a	b	b	b	b	b	a	a	b	a	b	b	a	a	a	b	b	b	b	b	b	b	b	a	b	b	b	b	a	a
IWA2220	a	a	a	a	a	a	a	a	a	a	a	a	a	a	b	a	a	a	a	a	b	b	a	b	a	a	a	b	b	a	a	a	a	a	a	a	a	a	a	a	a	b	b	a	a	b	b	a	a
IWB30993	b	a	a	a	a	b	b	b	a	b	b	a	b	a	a	a	b	b	a	a	b	b	b	b	b	a	a	b	a	a	a	b	b	b	a	a	a	b	b	b	b	b	a	b	b	a	b	a	b
IWA4052	a	b	b	a	b	b	b	b	a	b	b	b	a	b	a	b	b	b	b	a	b	a	a	b	b	a	b	a	b	b	a	b	b	b	b	a	b	a	b	a	a	b	a	b	a	a	b	a	b
IWA1380	a	a	b	b	b	b	b	b	a	b	b	b	a	b	b	b	b	b	b	b	a	a	a	b	b	b	b	b	b	b	b	b	b	b	a	b	a	a	b	b	b	b	a	b	b	b	a	b	b
IWA5742	b	a	a	a	a	a	a	b	b	a	a	a	a	a	a	a	a	a	a	b	a	b	a	b	a	b	a	a	a	a	b	b	a	a	a	b	b	a	b	a	a	b	a	b	b	b	b	a	b
IWB24022	b	a	a	a	a	b	b	a	a	b	b	a	b	b	a	a	a	a	a	a	b	a	b	b	a	a	a	a	a	a	a	a	a	a	a	a	a	a	a	a	a	a	a	a	a	a	a	a	a
IWB8767	a	a	b	b	b	a	a	a	a	a	a	a	a	b	a	b	b	b	b	b	a	a	b	a	b	a	a	a	b	b	a	a	a	a	a	a	b	b	a	a	a	a	b	a	a	a	a	a	a
IWB49048	b	b	b	b	b	b	b	b	b	b	b	b	b	b	b	b	b	b	b	b	b	b	a	b	b	b	a	b	b	b	a	b	b	b	a	a	b	b	b	b	b	b	b	b	b	b	b	a	a
IWB25709	b	b	b	b	b	b	b	b	b	b	b	b	b	b	b	b	b	b	b	b	b	a	a	a	a	b	b	b	b	b	a	b	b	b	b	b	b	a	b	b	b	b	b	b	b	b	b	b	b
IWB29394	b	a	b	b	a	a	b	b	b	a	a	b	b	a	a	b	a	a	a	b	b	a	b	a	a	b	a	b	a	b	a	b	b	b	b	a	b	a	b	b	b	b	b	b	b	b	b	a	a
IWB48382	a	b	a	b	b	b	b	b	b	b	b	a	b	b	a	b	b	b	b	b	b	a	b	b	b	b	b	b	b	b	a	a	a	a	b	b	b	b	b	b	b	b	a	b	b	b	b	a	b
IWB34210	-	b	b	a	b	b	a	b	b	b	b	a	b	a	b	a	b	b	b	b	b	b	b	b	b	b	b	a	b	a	b	b	b	b	b	a	b	b	b	b	b	b	a	b	b	b	b	b	b
IWB7873	b	a	b	a	b	b	b	b	a	b	b	a	a	b	b	a	b	b	b	b	b	b	b	a	a	a	b	b	b	a	a	b	b	b	a	a	a	a	b	b	b	b	a	b	b	b	b	b	b
IWA4814	b	a	b	b	b	b	b	a	a	a	b	b	a	b	b	b	b	b	b	b	b	a	b	b	b	b	b	b	b	b	a	b	b	b	a	a	b	b	b	b	b	a	b	b	a	b	b	b	b
IWB29412	b	a	b	a	a	a	a	a	b	a	a	a	b	a	a	a	a	a	a	a	a	a	a	b	a	b	a	b	a	a	a	a	a	a	a	a	b	a	b	b	b	b	a	b	b	b	b	a	a
IWB33515	b	a	a	b	b	b	b	b	a	a	a	b	b	b	b	b	b	b	b	b	a	a	b	b	b	b	b	b	b	a	b	b	b	b	a	b	a	a	b	b	b	a	a	b	b	b	b	b	b
IWB43431	b	a	b	b	b	a	b	b	a	b	b	b	a	b	b	b	b	b	b	b	a	a	a	b	b	a	b	b	b	b	a	b	b	b	a	b	a	a	b	b	b	b	b	a	b	b	b	b	b
IWB35000	a	a	a	b	a	a	a	a	a	a	a	b	b	a	a	a	a	a	a	b	b	a	a	a	a	a	b	b	b	a	a	a	a	a	a	a	a	b	b	b	b	a	a	a	a	b	a	a	b
IWB70782	a	b	a	b	b	b	b	b	a	b	b	b	b	b	b	b	b	b	b	b	b	b	b	b	b	b	b	a	b	b	b	b	b	b	b	b	b	b	a	a	a	a	b	a	a	a	a	b	b
IWB9125	b	b	b	a	a	b	b	a	b	b	b	a	a	b	b	a	b	b	b	b	a	a	b	a	b	a	a	a	a	a	b	b	b	b	b	a	a	b	b	b	b	a	b	b	b	a	a	a	b
IWB55813	b	b	b	b	b	b	b	b	b	b	b	b	b	b	b	b	b	b	b	b	b	a	b	b	b	b	b	b	b	b	b	b	b	b	b	b	b	b	a	b	b	a	b	b	a	a	a	b	b
IWB7453	a	b	a	a	a	a	a	b	b	a	a	b	b	a	a	a	a	a	a	a	a	a	b	b	a	b	b	a	a	b	a	a	a	a	b	b	b	b	a	a	a	a	b	a	a	a	a	b	b
IWB43528	b	a	a	a	b	b	a	b	b	a	a	b	b	b	a	a	b	b	b	a	a	a	b	b	a	b	b	b	b	b	a	a	a	a	a	b	b	a	a	a	a	a	b	a	a	a	a	b	b
IWB46908	-	a	a	a	a	b	b	b	a	a	b	a	a	b	a	a	b	b	a	a	b	a	b	b	a	a	a	a	b	a	a	a	a	a	a	a	a	b	a	a	a	a	a	a	b	a	b	a	a
IWA2659	b	a	a	b	b	a	a	a	b	a	a	a	b	a	a	a	a	a	a	b	b	a	b	b	b	b	a	b	a	b	a	a	a	a	a	b	b	a	b	b	b	b	a	b	b	b	b	a	a
IWB40315	b	b	a	a	a	a	a	a	b	a	b	a	b	b	a	a	a	a	a	a	a	b	b	b	a	b	a	a	a	a	b	a	a	a	b	a	b	b	a	a	a	a	a	a	a	a	a	a	a
IWB7308	a	b	a	b	a	b	b	a	b	b	b	b	b	a	a	b	a	a	a	a	b	b	b	b	b	b	b	a	a	b	b	b	b	b	b	b	b	b	a	a	a	a	b	a	a	a	a	a	a
IWB48330	-	b	a	b	b	b	b	b	b	b	a	a	a	b	a	b	b	b	b	a	a	a	b	b	a	b	b	a	a	a	b	b	b	b	b	b	a	a	a	a	a	a	a	a	a	a	a	b	b
IWB34821	b	b	a	a	a	b	b	a	b	a	b	b	a	b	b	a	b	b	a	b	a	b	a	a	b	b	b	a	b	b	b	b	b	b	b	b	b	a	a	b	a	a	a	b	a	b	a	a	a
IWB36098	b	b	b	b	b	a	a	a	a	a	a	a	a	a	b	a	b	b	a	b	a	b	a	b	a	a	b	a	a	a	b	a	a	a	b	a	b	a	a	a	a	a	b	a	a	a	a	b	a
IWA7507	-	b	a	b	a	a	a	b	b	a	a	a	a	a	a	b	a	a	a	a	b	b	a	a	b	a	b	a	b	a	b	a	a	a	b	b	b	b	b	b	b	b	a	b	b	b	b	a	b
IWB33279	-	a	a	a	b	a	a	a	a	a	a	a	b	b	a	a	b	b	b	b	b	a	a	b	b	a	a	b	b	b	a	b	b	b	a	a	a	b	b	a	b	b	a	b	b	b	b	a	a
IWB12084	b	a	b	b	b	b	b	b	b	b	b	a	b	a	b	b	b	b	b	b	b	a	b	b	a	b	b	b	a	b	b	a	b	b	b	b	b	a	b	b	b	b	b	b	b	b	b	b	b
IWA8603	b	b	a	a	a	a	b	b	b	b	b	a	a	a	a	a	a	a	a	b	b	a	b	b	a	a	a	a	b	a	a	b	a	a	b	a	a	b	a	b	b	a	a	a	a	a	a	a	b
IWB3728	b	b	a	b	b	a	a	b	b	a	b	a	b	b	a	b	a	a	b	a	b	a	a	a	a	a	a	b	b	b	a	b	a	a	b	b	b	b	b	b	b	b	a	b	b	b	b	b	a
IWB9970	a	b	b	a	a	b	b	b	b	b	b	b	b	b	b	a	b	b	a	b	b	b	b	b	b	a	b	b	b	b	b	b	b	b	b	b	b	a	a	b	b	b	a	b	b	b	b	b	b
IWB62176	-	b	b	b	b	b	b	a	a	b	b	b	b	b	b	b	b	b	b	b	b	b	b	b	b	b	b	b	b	b	b	b	b	b	a	b	b	b	a	b	b	b	b	b	b	b	b	b	b
IWA3197	a	a	a	a	a	a	a	a	b	a	a	b	a	a	a	a	a	a	a	a	a	b	b	b	b	b	b	b	a	a	a	a	a	a	b	b	b	b	a	a	a	a	a	a	a	b	a	b	b
IWB34320	b	b	b	b	b	b	b	a	b	b	b	b	a	b	b	b	b	b	b	b	b	a	b	b	b	b	b	b	b	b	a	b	b	b	b	b	b	a	b	b	b	b	b	b	b	b	b	b	b
IWB51496	a	b	b	a	a	b	b	a	b	a	b	b	b	b	a	a	a	a	a	b	b	b	b	b	b	a	a	b	b	a	b	b	b	b	a	b	a	b	b	b	b	a	a	b	b	b	b	a	b
IWB5649	a	b	b	a	b	b	b	b	b	b	a	b	a	b	a	b	b	b	b	b	a	a	b	a	b	b	a	b	b	b	b	a	b	a	b	b	a	b	b	b	b	b	b	b	b	a	b	a	b
IWB56395	a	a	b	b	b	b	b	a	b	a	a	b	b	b	b	b	b	b	b	b	a	a	a	a	b	b	a	a	b	b	b	a	a	a	a	a	a	a	a	a	a	b	b	a	a	a	a	b	a
IWB21609	b	a	a	a	a	a	a	a	a	a	a	a	a	a	a	a	a	a	a	a	a	a	a	a	a	a	a	a	a	b	a	a	a	a	a	a	a	a	a	a	a	a	a	a	a	a	a	a	a
IWB29678	a	a	a	a	a	a	a	a	a	a	a	a	a	a	a	a	a	a	a	a	a	a	a	a	a	a	a	a	a	a	a	a	a	a	a	a	a	a	a	a	a	b	a	a	a	a	a	a	a
IWB71385	a	a	b	a	a	a	a	a	b	a	a	b	b	a	b	a	a	a	a	b	a	b	b	b	b	b	a	b	a	b	b	b	b	b	b	b	b	b	b	b	b	a	a	b	b	a	a	b	b
IWB6899	a	b	b	a	b	b	a	b	b	a	a	b	b	a	b	a	b	b	b	b	b	b	b	b	b	a	a	b	a	b	a	b	b	b	b	a	a	b	b	b	b	b	b	b	b	b	b	a	b
IWB1253	a	a	b	a	b	a	a	a	b	-	a	a	b	b	b	a	b	b	b	b	b	b	a	a	a	a	a	b	b	b	b	b	b	b	a	a	a	b	b	b	b	b	b	b	b	b	b	b	b
IWA2645	b	b	b	b	b	b	b	b	a	b	b	b	b	b	b	b	b	b	b	a	b	b	b	a	a	b	a	b	b	b	b	-	b	b	a	a	a	b	a	a	a	a	a	a	a	a	b	a	a
IWB35901	b	a	b	b	b	b	b	b	b	b	a	b	b	b	b	b	b	b	b	b	b	a	b	b	b	b	b	b	b	b	b	b	b	b	a	b	a	b	b	b	b	b	b	b	b	a	b	b	a
IWB7565	b	b	a	a	b	b	b	a	b	b	b	b	b	b	b	a	a	a	b	b	b	b	b	b	b	b	b	b	b	b	b	b	b	b	b	b	a	b	b	b	b	b	b	b	b	a	b	b	b
IWB55699	b	a	a	a	a	a	a	a	b	a	a	a	a	a	a	a	a	a	a	a	a	b	a	a	a	a	a	a	a	a	b	a	a	a	b	a	a	b	b	b	b	b	a	a	b	a	a	a	a
IWB57597	b	b	b	a	a	b	b	b	b	b	b	b	b	b	b	b	a	a	b	b	b	b	b	a	b	b	b	b	b	b	a	a	a	a	b	b	b	b	b	b	b	b	b	b	b	b	b	b	a
IWB42678	a	a	a	a	a	a	a	a	a	a	a	a	b	a	a	a	a	a	a	a	a	a	a	a	a	a	a	a	a	a	a	a	a	a	a	a	a	a	a	a	a	a	b	a	a	a	a	a	a
IWB61079	b	b	b	b	b	b	b	a	a	a	b	a	a	b	b	a	a	a	a	a	a	b	b	a	b	b	b	a	b	b	a	b	b	b	b	b	b	b	b	b	a	b	a	b	a	b	a	b	b
IWB54603	b	b	b	b	a	b	b	a	b	b	b	b	b	a	b	b	a	a	a	b	a	b	b	b	b	b	a	b	a	b	b	b	b	b	b	b	b	b	b	-	b	b	b	b	b	b	a	a	b
IWB43978	b	a	a	b	b	a	a	a	a	a	a	a	a	a	b	a	b	b	b	b	b	a	a	a	a	a	b	b	a	a	a	b	b	b	a	a	a	b	a	a	b	a	b	b	b	a	a	b	b
IWB50844	a	b	b	b	b	a	a	b	b	b	b	b	b	a	b	b	a	a	b	b	b	b	b	b	b	b	b	b	b	a	a	b	b	b	b	b	b	b	b	a	a	b	b	b	b	b	a	b	b
IWB11318	b	a	a	a	a	a	a	a	a	b	b	b	a	a	a	a	a	a	a	b	b	a	a	a	a	b	a	a	a	b	a	b	b	b	a	b	b	a	a	a	a	b	a	b	a	b	a	a	b
IWB57456	a	a	a	a	a	a	a	a	a	a	a	a	a	a	a	a	a	b	a	a	a	a	a	a	a	a	a	a	a	a	a	a	a	a	a	a	a	a	a	b	a	a	a	a	a	a	a	a	a
IWB71722	-	a	a	a	a	a	a	a	a	a	b	a	a	a	b	a	b	b	a	a	b	a	a	a	a	a	a	b	a	a	a	a	b	b	b	b	a	b	b	b	b	b	a	a	b	a	b	a	a
IWB59847	a	a	a	a	a	b	b	a	a	a	a	b	b	a	b	a	a	a	a	b	b	a	b	b	a	a	a	b	a	b	b	a	a	a	a	a	a	a	b	a	a	a	b	a	a	b	b	b	b
IWA7618	a	b	b	b	b	b	b	b	b	b	b	a	b	a	b	b	b	b	b	b	b	b	b	a	a	b	b	b	b	a	b	a	a	a	b	b	b	b	b	b	b	b	a	b	b	b	a	b	a
IWB29624	b	b	b	b	b	b	b	b	b	a	a	b	a	a	a	b	b	b	b	b	a	a	b	a	a	b	a	b	a	b	a	a	b	b	b	b	b	a	b	a	b	a	a	a	b	b	b	b	b
IWB6327	b	b	b	b	b	b	b	b	b	a	a	b	a	a	a	b	b	b	b	b	a	a	b	a	b	b	b	b	a	b	a	a	b	b	b	b	b	a	b	b	b	a	b	a	b	b	b	b	b
IWB15968	-	b	b	b	b	b	b	b	a	b	b	b	b	b	b	b	b	b	b	a	b	b	b	b	b	b	b	b	b	b	b	b	b	b	b	b	a	b	b	b	b	b	b	b	b	a	b	a	a
IWB35265	a	a	a	a	b	a	a	a	a	a	a	b	b	b	a	a	a	a	b	b	a	a	a	a	b	b	a	b	b	b	a	a	a	a	a	b	a	a	a	a	a	a	a	a	a	b	a	a	a
IWB23124	-	b	a	a	a	a	a	a	a	a	a	a	a	a	b	a	a	a	a	a	b	a	a	a	a	a	b	a	a	a	a	a	a	a	a	b	a	a	b	b	b	a	b	b	b	a	a	a	a
IWB672	-	a	b	a	a	b	b	b	b	a	b	b	b	b	b	a	a	a	a	b	b	a	a	b	b	a	a	b	b	b	b	b	b	b	a	a	a	a	a	a	a	b	b	b	b	b	b	b	b
IWB10399	a	b	a	b	b	b	b	a	a	b	a	b	b	a	a	b	b	b	b	a	a	b	b	b	a	b	b	a	b	b	a	a	a	a	b	b	b	b	a	a	a	a	b	a	a	b	a	b	b
IWA3923	a	a	a	a	a	a	a	a	a	a	a	a	a	b	b	a	a	a	a	a	a	a	a	a	b	a	a	a	a	a	a	a	a	a	a	a	a	a	a	a	a	a	a	a	a	a	b	b	a
IWB48947	b	b	b	a	a	a	a	a	b	b	b	a	a	b	a	a	b	b	a	a	a	b	a	a	b	b	a	a	b	a	a	b	b	b	b	a	b	b	a	a	a	a	a	a	a	a	a	a	a
IWB13603	b	b	b	a	a	a	a	b	b	b	b	a	a	b	a	b	b	b	a	a	a	b	a	a	b	b	b	a	b	a	a	b	b	b	b	b	b	b	a	a	a	b	b	b	b	a	a	b	a
IWB55352	-	b	a	a	a	a	a	b	b	b	b	a	a	b	b	a	a	a	a	a	b	b	b	a	b	b	b	a	b	a	b	b	b	b	b	b	b	b	a	b	a	b	b	b	a	a	a	a	a
IWA4950	b	b	b	a	b	a	a	a	b	b	b	b	a	b	b	a	a	a	a	a	a	b	a	b	b	a	a	a	b	b	b	a	a	a	a	a	a	a	b	b	b	a	a	a	b	b	a	a	a
IWA5204	a	a	a	a	a	a	a	b	a	a	a	b	b	a	a	a	a	a	a	a	a	a	a	a	a	a	a	b	a	a	a	a	a	a	b	b	b	b	a	a	a	a	a	a	a	a	b	a	a
IWB25741	a	b	b	b	b	b	b	b	b	b	b	b	b	b	b	b	b	b	b	b	b	b	b	b	b	b	b	b	b	b	b	b	b	b	b	b	b	b	b	b	b	b	b	b	b	b	b	b	b
IWB8576	a	a	a	a	a	a	a	b	b	a	b	b	b	b	b	a	a	a	b	b	a	a	a	b	a	a	a	b	b	b	b	a	a	a	a	a	a	a	b	b	b	b	b	-	b	b	b	b	b
IWA1212	a	a	b	a	a	a	a	a	a	a	a	a	a	a	a	a	a	a	a	b	b	a	a	b	a	a	b	b	b	a	a	b	b	b	a	a	a	a	b	b	b	b	b	b	b	b	a	a	b
IWA3203	b	b	b	b	b	b	b	a	b	a	a	b	b	b	b	b	b	b	b	b	b	b	b	b	b	a	a	b	b	b	b	b	b	b	a	a	b	b	b	b	b	b	b	b	b	a	b	b	b
IWB55857	b	b	b	b	b	a	a	a	a	b	b	b	a	b	b	a	a	a	a	a	b	b	b	b	b	b	b	b	b	a	b	b	b	b	b	b	b	b	b	b	b	b	b	b	b	b	b	b	a
IWB43732	b	b	b	a	a	b	b	a	b	b	b	b	a	b	b	a	b	b	a	b	b	b	a	a	a	b	b	b	b	b	a	b	b	b	b	b	b	b	b	a	b	b	b	b	b	b	b	b	b
IWA2333	b	b	b	b	b	b	b	b	b	a	a	b	b	b	b	b	b	b	b	b	a	b	b	b	b	b	b	a	b	b	b	b	b	b	a	a	b	a	a	a	a	a	b	a	a	b	a	b	b
IWA1251	a	a	a	b	b	b	b	a	b	a	a	a	b	a	b	a	a	a	b	a	b	a	b	b	a	a	a	b	a	a	a	b	b	b	a	a	a	a	b	b	b	b	a	b	a	a	b	a	b
IWB48266	b	b	b	b	b	b	b	b	b	b	b	b	b	b	a	b	b	b	b	b	a	b	b	b	b	b	b	b	b	b	b	b	b	b	b	b	b	a	b	b	b	b	b	b	b	b	b	b	b
IWB73438	a	a	a	a	a	a	a	b	a	a	a	a	b	a	a	a	a	a	a	a	a	b	a	a	a	a	a	a	a	a	a	a	a	a	a	a	a	a	a	a	a	a	a	a	b	b	a	a	a
IWB45975	a	b	a	b	b	a	a	b	b	b	a	a	b	a	b	b	a	a	b	b	b	a	b	a	b	b	b	b	a	b	b	a	a	a	a	a	b	a	a	b	b	b	a	b	b	b	b	b	a
IWB73091	a	b	a	b	b	a	a	b	b	b	a	b	b	b	b	b	a	a	b	b	a	b	b	b	b	b	b	a	b	b	b	b	b	b	b	a	b	a	b	b	a	a	b	b	b	b	a	b	b
IWB68248	-	b	b	b	b	b	b	b	b	b	b	b	b	b	b	b	b	b	b	b	b	a	b	b	b	b	b	b	b	b	b	a	a	a	b	b	b	b	b	b	b	b	b	b	b	b	b	b	b
IWB65880	a	a	a	a	a	a	a	a	a	a	b	b	b	a	a	a	a	a	a	a	a	a	a	b	b	a	a	a	a	a	b	a	a	a	a	b	a	a	a	a	a	a	a	a	a	a	a	a	b
IWB54722	-	a	b	b	b	b	b	a	b	b	a	b	b	b	b	b	b	b	b	b	b	b	b	b	b	b	b	b	b	b	b	a	a	a	b	b	a	b	b	b	b	b	b	b	b	a	b	b	b
IWB4193	b	a	a	a	a	a	a	a	a	a	a	a	a	a	a	a	a	a	a	a	a	b	a	a	a	a	a	a	a	a	a	b	b	b	a	a	a	a	a	a	a	a	a	a	a	a	a	a	a
IWB66334	a	a	a	a	b	a	a	a	b	a	a	b	a	a	a	a	a	a	a	a	a	a	a	a	b	a	b	a	b	b	b	b	b	b	a	a	a	a	a	a	a	a	a	a	a	a	a	a	a
IWB29888	b	b	b	b	b	b	b	a	a	b	b	b	a	b	b	b	b	b	b	b	b	b	b	b	b	a	b	b	b	b	a	b	b	b	a	a	a	b	b	b	b	b	b	b	b	b	b	b	a
IWB26348	a	b	b	b	b	b	b	-	a	b	a	b	b	b	b	b	b	b	b	b	b	b	a	b	b	b	b	a	b	b	b	-	b	a	a	a	a	b	a	a	b	b	a	b	a	a	b	b	b
IWA5666	a	b	b	b	b	b	b	a	b	a	b	a	a	a	b	a	b	b	b	b	a	b	b	a	a	a	b	a	b	b	b	b	b	b	a	a	a	b	a	a	a	a	b	a	a	a	a	b	-
IWB49974	a	b	b	b	b	b	b	a	b	b	b	b	b	a	a	b	b	b	b	a	a	b	b	b	b	b	b	b	a	b	b	b	b	b	b	a	b	a	a	a	a	a	b	a	a	b	a	b	b
IWB25627	-	b	b	b	b	a	b	b	b	b	-	a	a	a	a	b	b	b	b	b	b	b	b	a	a	b	a	b	b	a	a	b	b	b	b	a	b	b	b	b	b	b	a	b	b	b	b	b	a
IWB38273	a	a	a	b	b	b	b	b	a	b	b	a	b	b	a	b	b	b	b	a	b	a	b	b	a	a	a	b	a	b	a	a	a	a	a	a	b	b	b	a	b	a	a	a	b	b	b	b	a
IWA3112	-	a	b	b	a	b	b	b	b	b	b	a	b	a	b	b	b	b	b	a	b	a	b	b	b	b	a	a	a	b	a	b	b	b	b	b	b	b	b	a	a	b	b	a	a	b	b	b	b
IWA4288	a	a	b	a	a	a	a	b	b	a	b	a	b	b	a	a	b	b	a	b	b	b	b	b	b	b	a	b	b	b	a	a	a	a	b	b	b	b	b	b	-	b	b	b	b	b	b	b	b
IWB12129	a	b	a	a	a	a	a	a	a	a	a	a	a	b	a	b	a	a	a	b	b	a	a	b	a	a	a	b	b	b	b	b	b	b	a	a	a	b	b	b	b	b	b	b	b	b	b	b	b
IWB38300	b	a	a	b	b	b	b	b	a	b	b	b	b	b	b	b	b	b	b	a	a	b	b	b	b	a	b	a	b	a	a	b	b	b	b	a	b	b	b	a	a	a	a	a	a	a	b	a	a
IWB36230	b	b	b	b	b	b	b	b	b	b	b	b	b	b	b	b	b	b	b	b	a	a	b	b	b	b	b	b	b	b	b	b	b	b	a	b	b	a	a	a	a	b	b	b	a	b	b	b	b
IWB10797	b	b	b	b	b	b	b	b	b	b	b	a	b	b	a	b	b	b	b	a	b	a	a	a	a	b	b	a	a	a	a	b	a	a	b	b	b	a	a	a	a	a	a	a	a	a	a	a	b
IWB60292	b	b	a	b	b	b	b	b	a	b	b	a	b	a	a	b	b	b	b	a	a	b	a	a	a	b	a	a	a	b	a	a	a	a	b	b	b	a	b	a	a	b	a	b	a	a	a	a	b
IWA4727	-	a	b	b	b	b	b	a	a	b	b	a	a	a	a	b	a	a	b	a	b	a	b	a	a	b	a	a	a	b	b	a	a	a	a	b	b	a	b	a	a	a	b	a	a	b	b	b	a
IWA497	b	b	b	b	b	b	b	a	b	b	b	b	b	b	b	b	b	b	b	a	a	b	a	a	b	b	b	a	b	b	a	a	a	-	b	a	b	a	a	a	a	a	a	a	a	a	a	b	b
IWA1110	b	b	a	b	b	b	b	a	b	b	b	b	a	a	b	b	b	b	b	-	b	a	a	b	a	a	b	b	a	b	a	b	b	b	b	a	a	a	b	b	-	b	b	b	b	b	b	a	b
IWA6822	b	a	b	b	b	b	b	a	b	a	a	b	b	a	a	b	b	b	b	a	a	a	a	b	b	b	a	b	b	b	b	b	b	b	a	b	a	b	b	b	b	b	a	b	b	b	b	a	a
IWB45289	-	a	a	b	b	b	b	a	a	b	b	b	a	a	a	b	b	b	b	a	a	a	a	a	a	b	b	a	a	b	a	b	b	b	b	a	a	a	a	a	a	a	a	a	a	a	a	a	a
IWB27877	a	a	a	a	a	a	a	a	a	b	a	a	b	a	b	a	a	a	a	a	b	a	a	a	b	a	a	a	a	a	a	b	b	b	a	a	a	a	b	b	b	b	b	b	b	a	a	a	a
IWB26632	b	b	a	a	a	a	a	a	a	a	a	a	a	a	a	a	a	a	a	b	b	a	a	a	a	b	b	b	a	b	a	b	b	b	a	b	b	b	b	b	b	a	a	b	b	b	b	a	a
IWB34748	-	b	a	a	a	a	a	a	a	a	a	b	b	a	b	a	b	b	a	b	b	b	b	a	a	a	b	b	b	b	a	b	b	b	a	a	a	a	b	b	b	b	a	b	b	a	a	a	b
IWB56648	a	b	a	a	b	b	b	b	b	b	b	a	a	a	a	b	b	b	a	b	a	b	b	b	a	a	b	a	a	a	a	a	a	a	a	a	a	a	a	a	a	b	a	a	a	a	a	b	a
IWB6963	b	b	-	b	b	b	b	a	b	b	a	b	a	b	a	a	a	a	b	a	a	a	a	a	a	a	b	b	a	b	a	a	a	a	a	a	a	a	a	a	a	a	a	a	a	a	a	a	a
IWB22779	a	a	a	b	b	a	a	a	a	a	a	a	a	a	a	a	a	a	b	b	a	b	b	a	a	a	a	a	a	b	b	a	b	b	a	a	a	a	a	b	a	a	a	a	a	b	a	a	a
IWB63629	a	a	b	b	b	b	b	b	b	a	a	b	b	b	b	b	b	b	b	b	b	b	a	b	b	a	b	a	b	a	b	b	b	b	a	a	a	b	b	b	b	b	b	b	b	b	b	b	a
IWA4638	a	b	a	b	b	b	b	b	b	b	a	b	b	a	a	b	b	b	b	b	b	b	b	b	b	b	b	b	a	b	b	b	b	b	a	b	a	b	b	b	b	b	a	b	b	b	b	b	b
IWB35659	b	a	b	b	b	b	b	b	b	b	b	b	b	a	b	a	b	b	b	a	a	b	b	a	b	b	b	a	a	a	a	a	a	a	b	b	b	a	a	a	a	a	a	a	a	a	a	a	a
IWB34386	b	b	a	b	b	b	b	b	a	b	b	b	a	b	a	b	b	b	b	b	a	b	b	a	a	b	b	b	b	b	b	a	a	a	b	b	b	a	b	b	b	a	a	b	b	b	b	a	b
IWB48318	a	a	b	b	b	b	b	b	b	b	b	b	b	b	b	b	a	a	b	b	b	b	b	b	b	b	a	b	b	b	a	b	b	b	a	a	a	b	a	b	b	b	b	b	a	b	a	a	b
IWB34076	-	b	a	a	a	b	b	a	b	b	b	b	a	a	a	a	a	a	a	a	a	a	a	b	b	b	b	a	a	a	b	a	a	a	a	a	b	a	a	a	a	a	a	a	a	a	a	a	a
IWA7430	a	b	b	a	a	a	a	a	a	a	b	b	a	b	b	a	a	a	a	b	a	a	a	a	a	b	a	a	b	a	a	b	b	b	b	a	b	a	a	a	a	a	a	a	a	a	b	a	a
IWB41575	a	a	b	b	a	b	b	a	a	b	b	b	a	b	a	b	b	b	a	b	a	a	a	b	b	b	a	b	b	a	b	a	a	a	b	a	a	a	a	a	a	a	a	a	a	a	a	a	b
IWB65620	a	a	b	b	b	a	a	a	a	a	a	a	a	a	b	b	b	b	a	b	a	b	b	b	b	a	b	b	a	b	b	a	a	a	b	a	b	a	a	a	-	a	a	b	b	b	a	b	a
IWB6675	b	a	a	a	a	b	b	a	a	a	a	b	b	a	a	a	b	b	a	b	a	b	a	a	b	b	b	a	a	b	a	b	b	b	a	b	a	a	a	a	-	b	a	a	a	a	b	b	a
IWA5912	b	a	a	b	b	b	b	a	b	b	b	b	a	b	a	b	b	b	b	b	a	a	a	a	a	a	b	b	a	a	b	b	b	b	a	a	a	b	a	a	a	a	a	a	a	a	a	a	b
IWB57007	a	a	b	b	b	b	b	b	b	b	b	b	b	b	b	b	b	b	b	a	b	b	b	a	a	b	b	a	b	b	b	a	a	a	b	b	b	b	a	a	a	a	a	a	a	b	b	b	b
IWB16121	b	a	a	a	a	a	a	a	b	a	a	a	a	a	a	a	a	a	a	a	b	a	a	a	a	a	a	a	a	a	a	a	a	a	a	a	a	a	a	b	b	a	a	a	a	a	a	a	a
IWB71950	-	a	a	a	a	a	a	a	b	a	a	a	a	b	a	a	a	a	a	a	a	a	a	b	a	a	a	a	b	a	a	a	a	a	a	a	a	a	a	a	a	a	a	a	a	b	a	a	a
IWB65586	b	a	a	a	a	a	a	a	a	a	a	a	a	a	a	a	a	a	a	a	a	a	b	a	a	a	a	a	a	a	a	a	a	a	a	a	a	a	a	a	a	a	a	a	a	a	a	a	a
IWB57792	a	a	b	b	b	b	b	b	a	b	a	b	a	a	a	b	b	b	b	b	b	a	a	b	a	a	b	b	a	a	b	a	a	a	a	b	a	a	a	-	a	a	a	b	b	a	a	b	a
IWB6544	b	b	b	a	a	a	a	a	a	a	a	a	a	b	b	a	a	a	a	b	b	b	a	b	a	b	a	b	b	a	a	a	a	a	a	a	b	a	a	a	a	a	a	b	a	a	a	a	a
IWB19259	b	a	a	a	a	a	a	b	a	a	a	a	a	a	a	a	a	a	a	a	a	b	a	a	a	b	a	a	b	a	b	a	a	a	a	a	a	a	a	a	a	a	a	a	a	a	a	a	a
IWB22880	b	a	a	a	a	a	a	a	a	a	a	b	b	a	a	a	a	a	a	b	a	a	b	a	a	a	b	a	a	a	a	a	a	a	a	a	a	b	a	b	b	a	a	a	b	a	b	a	b
IWA7402	a	a	a	a	b	b	b	b	a	b	b	a	a	b	a	b	b	b	a	a	a	b	a	a	a	b	a	a	a	a	b	a	a	a	b	a	b	b	a	a	a	a	a	a	a	a	a	a	b
IWB28063	a	a	a	a	a	b	b	a	a	b	b	a	a	a	a	a	a	a	a	a	b	a	a	a	a	a	a	a	a	a	a	a	a	a	a	a	a	a	a	a	a	b	a	a	a	a	a	a	a
IWB40712	b	b	a	b	b	b	b	b	b	b	b	b	b	a	a	b	b	b	b	a	b	a	b	a	b	b	b	a	a	b	b	b	b	b	b	b	b	b	b	b	b	b	b	a	b	b	b	b	b
IWA5167	b	a	b	b	b	b	b	b	a	b	b	a	a	a	a	b	b	b	b	b	b	b	b	b	b	b	a	b	a	a	b	b	b	b	b	a	b	b	a	b	b	b	b	b	b	b	a	b	a
IWB62409	-	b	b	a	a	a	a	a	b	b	b	b	b	b	b	a	a	a	a	a	b	b	b	b	b	b	b	b	b	b	b	a	a	a	b	a	b	b	b	b	b	a	b	b	b	b	b	b	b
IWB12657	a	b	b	b	b	b	b	b	a	b	b	a	a	b	b	b	b	b	b	a	b	b	a	b	b	b	a	b	b	b	b	b	b	b	a	b	b	a	b	a	a	b	a	b	b	b	b	b	a
IWB6919	a	a	a	a	a	a	a	a	a	a	a	b	b	b	a	a	a	a	a	a	a	a	a	a	a	a	a	a	a	b	b	a	a	a	a	a	b	b	b	b	a	a	a	a	a	a	b	a	b
IWB40182	a	a	a	a	a	a	a	a	a	a	a	a	a	a	a	a	a	a	a	a	a	a	a	a	a	b	a	a	a	a	a	a	a	a	a	a	b	a	a	a	a	a	a	a	a	a	b	a	a
IWB71573	a	b	a	b	a	a	a	a	a	a	a	a	a	a	a	a	a	a	b	a	a	a	a	a	a	b	a	a	a	a	a	b	a	a	a	a	b	a	b	b	b	b	a	a	b	b	a	b	a
IWB52359	b	b	b	b	b	b	b	b	b	b	b	b	a	b	b	b	b	b	b	b	b	b	a	b	-	b	b	b	b	b	a	b	b	b	b	b	b	a	a	a	b	a	b	a	b	b	b	b	b
IWB11608	b	b	b	b	b	b	b	b	b	b	b	b	b	b	a	b	b	b	b	b	b	b	b	b	b	b	b	b	b	b	b	b	b	b	b	b	b	b	b	b	b	b	b	b	b	a	a	b	b
IWB28062	a	a	b	b	b	a	a	b	b	a	a	b	b	a	b	a	a	a	a	b	a	b	b	b	b	b	b	a	b	b	b	b	b	b	b	b	b	b	b	b	-	a	b	b	b	b	b	b	b
IWB61639	b	b	a	b	b	b	b	b	b	b	b	b	b	b	b	b	b	b	b	b	b	b	a	a	b	b	a	b	b	b	a	a	a	a	b	b	b	b	a	b	b	b	b	b	a	b	a	b	b
IWA3497	a	a	a	a	a	a	a	a	a	-	a	a	a	a	a	a	a	a	a	a	a	a	a	a	a	a	a	b	a	a	b	a	a	a	a	b	a	a	a	b	b	a	a	a	b	b	a	a	a
IWA4326	b	a	a	a	a	a	a	b	a	a	a	b	b	a	b	a	a	a	a	b	b	b	b	b	-	b	a	b	b	a	a	a	a	a	a	a	b	a	a	a	a	a	a	a	a	a	a	a	b
IWB44145	a	a	a	b	b	a	a	b	a	a	a	b	a	b	b	b	b	b	b	b	b	a	a	a	a	b	b	a	b	a	b	b	b	b	a	b	a	a	b	a	b	a	b	b	b	b	a	b	b
IWB11515	a	a	a	a	a	a	a	a	a	a	a	a	b	a	b	a	a	a	a	b	a	a	a	b	b	a	a	a	a	a	b	a	a	a	a	a	b	a	a	b	a	b	b	a	a	a	a	a	a
IWB25442	b	a	a	b	b	b	b	b	b	b	b	a	b	a	a	b	b	b	b	a	b	b	b	b	b	b	b	b	b	b	b	b	b	b	b	b	b	a	a	a	a	a	a	a	a	a	a	b	b
IWB36064	-	a	a	b	b	b	b	b	a	b	b	a	a	b	a	b	b	b	a	a	b	a	a	a	a	a	b	a	a	a	b	b	b	b	a	a	a	a	a	b	b	a	b	b	a	b	a	a	a
IWA5229	-	a	a	b	b	b	b	b	a	b	b	a	a	b	b	b	b	b	a	a	a	a	b	b	a	b	b	a	a	a	a	a	a	a	a	a	a	a	a	a	a	a	a	a	a	a	a	a	a
IWB55117	a	a	a	b	b	a	a	b	a	a	a	a	b	a	a	b	b	b	a	a	b	a	a	a	b	a	a	b	a	b	a	a	a	a	a	a	b	a	b	b	b	b	b	b	a	b	b	-	a
IWB8272	a	b	a	a	a	a	a	a	b	a	a	b	a	b	a	a	a	a	a	a	a	b	a	b	a	b	a	a	b	a	a	a	a	a	b	a	a	a	a	a	a	a	a	a	a	a	a	a	b
IWB7254	a	b	b	a	a	a	a	a	a	a	a	a	b	a	a	a	a	a	a	a	a	a	b	b	a	b	b	a	a	a	a	a	a	a	a	a	a	a	b	a	a	b	b	a	a	a	a	a	a
IWB72443	b	b	b	a	a	a	a	b	b	b	b	b	b	b	b	b	a	a	a	b	a	b	b	b	-	b	b	a	b	-	a	a	a	a	b	b	b	b	a	a	a	a	a	a	a	a	a	a	b
IWB29475	-	a	b	b	b	a	a	b	b	b	b	a	a	a	a	b	b	b	b	a	a	b	b	a	a	a	b	a	a	a	b	a	a	a	b	b	b	a	a	a	a	a	a	a	a	a	a	a	a
IWB57398	b	b	b	b	b	b	b	b	b	b	b	b	a	b	b	b	b	b	b	b	b	b	b	b	b	b	b	b	b	b	b	b	b	b	b	b	a	b	b	b	b	b	b	b	b	b	b	b	a
IWB65763	-	b	b	a	b	b	b	b	b	b	b	b	b	b	b	b	b	b	b	a	b	b	b	b	b	b	a	a	a	b	b	a	a	a	b	a	b	a	b	b	b	b	b	b	b	b	b	a	a
IWB40585	b	a	b	b	b	b	b	b	a	b	b	b	a	b	b	b	b	b	b	a	b	b	b	b	-	a	b	b	b	-	b	b	b	b	b	a	a	b	b	b	b	a	b	b	b	b	b	a	a
IWB62134	b	b	b	b	b	b	b	b	b	b	b	b	a	b	b	b	b	b	b	b	b	b	b	b	b	b	b	b	b	a	b	b	b	b	b	b	b	a	a	b	b	b	b	a	a	b	a	b	b
IWB34947	b	b	b	b	b	b	b	b	b	b	a	b	b	b	b	b	b	b	b	b	a	b	b	b	b	b	b	a	b	b	a	b	b	b	b	b	a	b	b	b	b	b	b	a	a	-	a	b	b
IWB72557	-	a	a	a	a	b	b	a	a	b	b	a	a	a	b	a	a	a	a	a	a	b	a	a	a	a	a	a	a	a	a	b	b	b	a	a	a	a	a	a	a	a	a	a	a	a	a	a	a
IWB27783	b	a	a	a	a	b	b	a	a	a	b	b	a	b	a	a	a	a	a	a	a	b	a	a	b	a	a	a	b	b	a	a	a	a	a	a	a	b	a	a	a	a	a	a	a	a	a	a	a
IWB6905	b	a	a	a	a	a	a	a	a	a	a	b	b	a	b	a	a	a	a	a	a	a	a	-	a	b	b	b	a	a	a	a	a	a	a	a	-	a	a	a	a	a	a	a	a	a	a	a	a
IWB12293	a	a	a	b	b	a	a	b	b	a	a	a	a	a	a	b	b	b	a	a	a	b	b	b	a	a	a	a	a	b	a	a	a	a	a	a	a	a	a	a	a	a	a	a	a	-	a	a	a
IWB8588	-	a	a	a	a	b	b	a	a	a	a	a	a	a	a	a	a	a	a	a	a	a	b	b	-	b	b	a	a	-	a	a	a	a	a	a	a	b	a	a	a	a	a	a	a	a	a	a	a
IWB22510	-	a	a	b	b	a	a	b	b	a	b	b	a	b	a	b	b	b	a	a	a	b	b	b	b	b	b	b	b	b	a	b	b	b	b	a	a	b	a	b	a	a	b	a	a	a	a	a	a
IWB31733	b	a	a	a	b	b	b	a	a	a	a	b	b	b	b	a	b	b	b	a	b	a	b	b	b	b	b	b	b	a	a	b	b	b	a	a	a	a	a	a	a	a	b	a	a	a	a	b	a
IWA3120	-	b	b	b	b	a	a	b	b	b	b	a	a	b	a	b	b	b	b	b	b	b	a	a	b	b	b	b	a	b	b	a	a	a	b	b	b	b	b	b	b	b	a	b	b	a	b	a	b
IWB14137	a	a	b	a	b	a	a	b	b	a	a	a	b	b	a	a	b	b	b	b	a	b	b	b	b	b	a	b	b	b	b	a	a	a	a	b	b	a	a	a	a	a	a	a	a	a	a	a	b
IWA3549	a	b	b	b	b	a	a	a	b	b	b	b	b	a	a	b	b	b	b	a	b	a	a	a	b	a	b	a	b	b	a	b	b	b	b	b	b	a	a	a	a	a	a	a	a	b	a	a	b
IWB44448	a	a	b	b	b	b	b	b	a	b	b	b	b	b	b	b	b	b	b	b	b	b	b	a	a	b	b	b	b	a	b	b	b	b	b	a	b	b	a	a	b	a	b	b	b	b	a	b	a
IWB62288	b	a	a	a	a	a	a	a	a	a	a	a	b	a	a	a	a	a	a	a	a	b	b	a	a	b	b	b	b	a	b	a	b	b	a	b	b	a	a	a	b	a	a	b	a	a	b	a	a
IWB48240	a	a	b	b	b	b	b	b	b	b	b	b	b	b	b	b	b	b	b	b	b	b	b	b	b	b	b	b	b	b	b	b	b	b	b	-	b	b	a	a	a	b	b	b	a	b	a	b	a
IWB46244	-	b	a	a	a	a	a	a	a	a	a	b	b	a	a	a	a	a	a	a	b	b	b	a	b	b	b	a	a	a	b	a	a	a	b	b	a	a	b	b	b	b	a	b	b	a	b	a	b
IWB28719	b	a	a	a	a	a	a	a	b	a	a	a	a	a	a	a	b	b	a	b	b	a	b	a	b	a	a	b	a	a	a	a	a	a	a	a	a	b	b	b	b	b	a	b	b	b	a	a	a
IWB34517	b	a	b	b	b	b	b	a	a	a	b	b	a	b	b	b	b	b	b	b	b	b	a	b	a	a	a	b	b	a	a	b	a	a	a	a	a	b	b	a	a	b	a	a	a	a	b	b	a
IWB24282	a	a	a	a	a	a	a	b	a	a	a	a	b	a	a	a	a	a	a	a	a	b	a	a	a	a	a	a	b	b	a	b	b	b	a	a	a	a	a	a	a	a	a	a	a	a	b	a	a
IWB40211	a	a	b	b	b	a	a	a	a	b	b	b	b	a	b	b	b	b	b	b	b	a	a	a	b	a	b	b	b	a	b	b	b	b	a	b	a	b	a	a	a	b	b	b	a	b	b	b	b
IWB34588	b	b	a	b	a	b	b	a	a	a	b	b	b	b	a	b	b	b	b	a	a	a	b	a	a	b	b	b	b	a	b	a	b	b	b	a	a	b	b	b	b	b	b	b	b	b	b	a	a
IWB57072	a	a	b	b	b	b	b	b	b	b	b	b	b	b	b	b	b	b	b	b	b	b	b	b	b	b	b	b	b	b	b	b	b	b	b	b	b	b	b	b	b	b	b	b	b	b	b	b	b
IWB68445	b	b	b	a	b	a	a	b	a	b	b	b	b	b	b	a	a	a	a	b	b	b	a	a	a	a	b	b	b	-	b	b	b	b	b	-	b	b	a	b	a	a	b	a	a	a	b	b	b
IWB26960	b	b	b	b	b	b	b	b	a	b	b	b	b	b	b	b	b	b	b	b	b	b	a	b	a	b	b	b	b	b	b	b	b	b	b	b	b	a	b	b	b	b	b	b	b	b	a	b	b
IWB74	a	a	a	a	b	a	a	a	b	a	a	b	b	b	a	a	a	a	a	a	b	a	b	a	a	a	a	b	b	a	b	b	b	b	b	a	a	b	b	b	b	b	a	b	b	b	b	a	a
IWB23438	b	a	a	a	a	b	b	b	a	a	a	a	a	a	a	a	b	b	a	a	a	a	a	a	a	a	a	b	a	a	b	a	a	a	a	a	a	-	b	b	b	b	a	b	b	b	b	a	a
IWB7202	a	a	a	a	a	a	a	a	a	a	a	a	b	a	a	a	a	a	a	a	a	a	a	a	a	a	a	a	a	a	a	a	b	b	a	a	a	a	b	b	b	a	b	b	b	b	a	a	b
IWB45445	b	a	a	a	a	a	a	a	a	b	a	a	a	a	a	a	b	b	a	b	b	a	a	a	a	a	a	b	a	a	a	a	a	a	b	a	b	a	b	b	b	b	a	b	b	b	b	a	b
IWB7166	b	b	b	b	b	b	b	b	b	b	b	b	b	b	b	b	b	b	b	a	a	b	b	b	b	b	b	b	b	b	b	a	b	b	b	b	b	b	b	b	b	b	b	b	b	b	b	b	b
IWB3454	b	b	a	b	a	a	a	a	a	a	b	a	b	b	a	b	b	b	a	a	a	a	a	a	a	a	a	b	a	a	a	a	a	a	a	a	a	a	a	a	a	b	a	b	a	a	a	a	a
IWB72380	a	a	a	b	b	b	b	a	a	b	b	b	b	b	b	b	b	b	b	a	a	b	b	b	a	a	b	a	b	b	b	b	b	b	b	a	b	a	a	a	a	a	b	a	a	a	a	b	b
IWB44316	b	b	a	b	b	b	b	b	b	b	b	a	b	b	a	b	b	b	b	a	a	b	b	b	b	b	a	b	b	a	a	a	a	a	b	a	b	b	a	a	a	a	a	a	a	a	a	a	b
IWA1601	b	b	a	b	b	a	a	b	b	b	a	a	b	b	b	b	b	b	a	b	b	b	b	b	a	b	b	a	b	b	b	a	a	a	b	b	b	b	a	a	b	a	a	a	a	b	b	a	b
IWB25007	-	b	b	a	b	b	b	b	b	a	a	b	b	b	b	a	a	a	a	b	b	b	b	b	b	b	b	b	b	a	b	b	b	b	b	b	b	b	b	b	b	b	b	b	b	b	b	b	b
IWB20375	b	a	a	a	a	a	a	a	a	a	a	a	a	a	a	a	a	a	a	a	a	a	a	a	a	a	a	a	a	a	a	b	b	b	a	a	a	a	a	a	a	a	a	a	a	a	a	b	a
IWB65625	a	b	a	a	a	a	a	a	a	a	b	a	a	a	b	a	a	a	a	a	a	a	a	a	a	a	a	a	a	b	a	b	b	b	b	a	a	a	a	a	a	a	a	a	a	a	a	a	a
IWB62760	b	b	b	a	b	b	b	b	b	b	b	b	b	b	b	b	b	b	a	b	a	b	b	b	b	b	b	b	b	b	a	b	b	b	b	b	b	b	b	b	b	a	a	a	a	b	b	b	b
IWB20875	b	b	a	b	b	b	b	b	b	b	b	b	a	a	a	b	b	b	b	a	a	b	a	b	b	a	b	a	a	b	a	a	a	a	b	a	a	b	b	b	b	b	b	b	b	a	b	a	a
IWA1667	b	a	a	b	b	b	b	b	a	b	b	b	a	a	b	b	b	b	b	a	a	b	b	b	b	b	b	a	a	b	b	a	a	a	a	b	b	a	a	a	a	a	b	a	a	a	a	a	b
IWB7051	b	b	b	a	a	b	b	a	a	a	a	b	a	b	a	a	a	a	a	a	b	a	a	b	b	a	a	b	a	a	a	a	a	a	a	a	a	a	a	a	a	a	b	a	a	a	a	a	a
IWB35564	b	b	b	b	b	b	b	b	b	a	a	a	b	b	a	b	b	b	b	b	b	b	a	b	a	b	b	b	b	b	b	a	a	a	b	b	b	b	a	a	a	b	b	b	b	b	b	b	b
IWA6798	-	a	a	b	b	b	b	b	a	b	b	b	b	b	a	b	b	b	b	a	b	a	b	a	a	a	a	b	b	b	a	b	b	b	a	b	b	a	b	b	b	b	b	b	b	b	b	a	b
IWB58252	b	b	a	b	a	b	b	b	b	b	b	a	b	b	b	b	b	b	a	a	b	b	b	a	a	b	b	a	b	a	b	a	a	a	b	a	b	b	b	b	b	b	a	b	b	b	b	a	b
IWB11730	a	b	b	a	a	a	a	a	b	a	a	b	a	b	a	b	b	b	a	a	b	a	a	b	b	a	a	b	b	b	a	b	b	b	b	a	a	a	b	a	a	a	a	a	a	a	b	a	a
IWB41729	a	a	a	b	b	a	a	a	a	b	b	b	a	a	b	a	b	b	b	a	a	a	a	a	a	a	a	b	b	b	a	a	a	a	a	a	a	a	a	a	a	a	b	a	a	a	b	a	a
IWB61201	b	a	b	a	a	a	a	b	b	b	b	b	b	b	b	a	a	a	a	b	a	b	b	b	b	b	b	b	b	a	b	b	b	b	a	b	b	a	b	a	a	a	b	b	b	b	b	b	b
IWB46022	a	a	a	b	a	a	a	a	b	a	b	a	a	b	a	a	a	a	b	a	a	b	a	b	a	a	a	a	a	a	a	a	a	a	a	b	b	b	a	a	a	a	b	a	a	a	a	a	a
IWA8498	b	a	a	b	b	a	a	a	a	a	a	a	a	a	a	b	b	b	b	a	a	a	a	a	a	a	b	a	b	a	b	a	a	a	a	a	a	a	a	a	a	a	b	a	a	a	a	b	b
IWB43695	b	a	b	b	b	b	b	b	b	b	b	a	b	a	b	b	b	b	a	a	a	a	b	b	a	a	b	a	a	a	a	b	b	b	a	b	b	a	a	a	a	a	a	a	a	a	a	a	b
IWB9833	a	a	b	b	b	a	a	b	a	b	b	b	b	a	b	b	b	b	b	b	b	a	a	b	b	a	b	b	b	a	b	b	b	b	b	b	b	b	b	b	b	b	b	b	b	b	b	b	b
IWB45082	a	a	b	a	b	a	a	b	b	b	a	b	b	a	b	a	a	a	b	b	b	b	b	b	b	b	b	b	b	b	b	b	b	b	b	b	b	b	b	b	b	b	b	b	b	b	b	b	b
IWB46874	b	a	b	b	b	a	a	a	a	a	a	b	a	a	a	b	b	b	a	a	a	a	a	b	a	b	a	a	a	b	a	b	b	b	a	a	a	a	a	a	a	a	a	a	a	a	a	b	a
IWB47559	b	b	b	b	b	b	b	b	b	a	a	b	b	b	b	b	b	b	b	a	b	b	b	a	b	b	a	b	b	b	b	b	b	b	b	b	a	b	b	b	b	b	b	b	b	b	b	a	a
IWB26157	a	a	a	a	b	b	b	b	a	b	b	a	a	b	a	a	b	b	b	a	a	a	a	b	a	a	a	a	a	a	a	b	b	b	a	a	a	a	b	b	b	a	a	b	b	a	b	a	a
IWB6159	b	b	a	b	b	b	b	a	b	b	b	a	a	a	a	b	b	b	b	b	b	a	a	a	a	a	b	b	b	b	a	a	a	a	b	b	b	b	a	a	a	b	a	a	a	b	b	b	a
IWA7624	a	a	b	a	a	a	a	a	b	a	a	b	b	a	a	a	a	a	a	a	b	a	a	a	b	a	a	b	a	a	a	a	a	a	a	a	a	a	b	a	b	a	a	b	b	a	b	b	b
IWB64018	a	b	b	b	b	b	b	a	b	b	b	b	a	b	a	b	b	b	b	b	b	a	b	b	a	a	a	b	b	a	a	b	b	b	b	b	a	b	b	b	b	a	b	b	b	b	b	b	a
IWB53914	b	a	a	b	a	b	b	b	a	b	b	a	b	b	a	a	b	b	b	b	a	a	a	a	a	a	a	a	a	b	a	a	a	a	a	a	a	a	a	a	a	a	a	a	a	a	a	a	b
IWB25047	b	b	a	a	a	a	a	b	b	a	a	a	a	a	b	a	a	a	a	b	b	a	a	b	b	a	b	b	b	a	a	a	a	a	b	a	a	a	a	b	b	b	b	b	a	b	a	a	a
IWB41104	a	a	b	a	a	a	a	a	a	a	a	a	a	a	a	a	a	a	a	a	a	a	b	b	b	b	a	a	a	b	a	a	a	a	a	a	b	a	a	a	a	a	a	a	a	a	a	a	b
IWB41047	b	b	b	b	b	b	b	b	b	b	b	b	b	b	b	b	b	b	b	a	b	b	b	a	-	b	a	b	a	-	a	b	b	b	b	b	b	a	b	a	a	a	a	a	a	a	a	b	b
IWB60530	b	a	a	a	a	a	a	a	a	a	a	a	a	a	a	a	a	a	a	b	a	b	a	a	a	b	a	a	b	a	a	a	a	a	a	a	a	b	a	a	a	a	a	a	a	a	a	b	a
IWB64989	a	a	a	a	a	a	a	a	a	a	a	a	b	b	a	a	a	a	a	b	b	b	a	b	b	a	a	b	b	a	b	b	a	a	a	a	b	b	b	b	b	b	a	b	b	a	a	a	b
IWA5429	a	a	a	b	b	b	b	b	b	a	a	a	a	a	a	b	a	a	b	a	a	a	b	a	a	a	a	b	a	a	b	b	b	b	b	a	a	a	a	a	a	a	a	a	a	a	b	a	b
IWB38639	b	a	a	b	a	b	b	b	b	b	b	a	a	b	b	a	b	b	b	b	a	a	b	b	b	b	b	b	a	b	b	a	b	b	a	a	b	a	a	a	a	a	a	a	a	a	a	a	b
IWB54475	a	a	b	a	a	a	a	a	a	a	a	a	a	a	a	a	a	a	a	a	a	a	a	a	a	a	a	a	a	a	a	a	a	a	b	a	a	a	a	a	a	a	a	a	a	-	a	a	b
IWB29466	b	a	a	a	b	b	b	b	b	a	b	b	b	b	a	b	b	b	a	b	b	a	a	b	a	a	a	b	b	a	b	a	-	a	a	b	b	b	b	b	b	b	b	b	b	a	b	a	b
IWB63098	-	b	b	b	b	b	b	a	b	a	a	b	b	a	a	b	b	b	b	b	b	b	a	a	b	b	b	b	a	b	b	a	b	b	b	b	a	b	b	b	b	b	b	b	b	b	b	b	a
IWB11200	b	a	b	a	a	a	a	a	a	a	a	b	b	b	b	a	a	a	a	a	a	a	a	b	b	a	a	b	a	a	a	b	b	b	a	a	a	a	b	b	b	b	a	b	b	b	b	a	a
IWB6207	b	a	b	b	b	b	b	a	a	a	b	b	b	b	b	b	b	b	b	a	a	b	b	b	b	b	b	b	b	b	a	b	a	a	a	a	b	b	a	b	a	b	b	a	a	a	b	a	a
IWA7073	a	b	a	b	b	b	b	a	b	b	b	a	a	a	a	b	b	b	b	a	a	b	a	a	b	b	a	a	b	b	b	-	a	a	b	b	b	b	a	a	a	a	b	a	a	a	a	b	a
IWB44447	a	b	a	a	a	b	b	a	a	a	a	a	a	a	b	a	a	a	a	b	a	a	b	a	b	a	a	a	a	a	a	a	a	a	a	a	b	b	a	a	a	a	a	a	a	a	a	a	b
IWB50898	a	a	b	b	a	b	b	b	b	b	b	b	a	b	b	b	a	a	a	b	b	b	a	b	b	b	b	a	a	b	a	b	b	b	b	b	b	b	b	b	b	b	b	b	b	b	a	b	b
IWB49982	-	a	a	b	b	b	b	b	b	a	a	b	a	b	b	b	b	b	b	a	a	a	a	b	b	b	b	a	b	b	a	b	b	b	a	b	a	b	a	a	a	a	a	a	a	a	a	b	a
IWA6273	b	a	b	b	b	b	b	b	b	b	b	b	b	b	b	b	b	b	b	b	b	a	a	a	a	b	b	b	b	b	b	b	b	b	a	b	a	a	b	b	b	b	b	b	b	b	b	b	b
IWB49268	a	b	a	a	a	a	a	b	a	b	a	a	a	a	b	a	a	a	a	b	a	a	a	a	a	a	a	b	a	a	a	a	a	a	b	a	a	a	a	a	a	a	a	a	a	a	b	a	a
IWB23126	a	b	a	a	a	b	b	b	a	b	b	a	b	b	b	a	a	a	b	b	b	a	a	a	a	a	b	a	a	a	a	a	a	a	a	b	b	b	a	a	b	b	a	a	a	a	b	a	b
IWB55724	b	a	b	b	b	b	b	b	b	b	b	b	a	b	b	b	b	b	b	b	b	b	a	a	a	b	a	b	b	a	b	b	b	b	b	a	a	-	b	b	b	b	b	b	b	b	b	b	a
IWB48794	b	b	b	b	b	b	b	a	b	a	a	a	a	b	a	b	b	b	b	a	a	b	b	b	b	b	b	b	b	b	a	a	a	a	b	b	b	a	a	a	a	b	b	b	b	b	a	b	a
IWA2372	b	a	b	b	b	b	b	b	b	b	b	a	b	b	b	b	b	b	b	a	a	a	b	b	b	a	b	a	b	a	b	b	b	b	a	a	a	b	b	b	a	b	b	b	b	a	b	b	b
IWB26392	b	b	b	b	b	b	b	b	b	b	b	b	b	b	b	b	b	b	b	b	b	b	a	b	b	a	b	b	b	a	b	b	b	b	b	b	b	b	b	b	b	b	b	b	b	b	b	b	b
IWB72071	b	b	b	b	b	a	a	b	b	b	b	b	b	a	b	b	b	b	b	b	a	b	a	a	a	a	b	b	b	a	b	b	b	b	b	-	b	b	b	b	b	b	b	b	b	b	b	b	b
IWA8460	b	a	b	b	b	b	b	a	b	a	a	b	b	b	b	b	b	b	b	b	a	b	b	b	b	b	b	a	b	b	b	b	b	b	a	b	a	b	b	b	b	a	b	b	b	b	b	b	b
IWB10449	a	a	a	a	a	a	a	b	b	a	a	a	a	a	b	a	a	a	a	a	a	a	a	a	a	a	b	a	a	b	a	a	a	a	a	a	a	a	a	a	a	a	a	a	a	a	a	b	a
IWB59960	a	b	a	a	a	a	a	b	a	b	a	a	a	a	a	b	b	b	a	a	a	b	a	a	a	b	a	a	a	a	a	a	a	a	b	a	b	-	a	a	a	a	a	a	a	a	a	a	a
IWB61619	b	b	b	a	b	b	b	b	b	b	b	b	b	b	a	b	b	b	b	b	b	b	b	b	b	b	b	b	b	b	b	b	b	b	b	b	b	b	b	b	b	b	a	b	b	b	b	b	b
IWB7629	b	a	b	b	b	b	b	b	a	a	b	b	b	b	a	b	b	b	a	b	a	b	a	a	a	a	a	a	a	a	b	a	a	a	a	b	b	b	b	b	b	b	b	b	b	b	b	a	b
IWB65970	b	b	b	a	a	b	b	a	a	b	a	b	a	a	a	a	a	a	a	a	b	b	b	b	b	a	a	b	a	b	b	b	b	b	b	b	a	b	b	b	b	b	a	b	b	b	b	a	a
IWB40358	a	b	a	b	b	b	a	b	b	a	a	b	b	b	b	b	b	b	b	a	b	b	b	b	b	b	b	b	a	b	b	b	b	b	b	b	b	b	b	b	b	b	b	b	b	b	b	b	b
IWA3039	-	a	a	a	a	b	b	a	a	a	a	b	b	b	a	a	a	a	a	a	a	b	a	b	b	b	b	b	a	a	a	a	a	a	a	a	b	b	b	a	a	b	a	b	b	b	a	b	b
IWB49801	a	a	a	a	a	a	a	a	a	b	a	a	a	a	a	a	a	a	a	a	a	a	b	a	a	b	a	a	a	-	a	a	a	a	a	b	b	a	a	a	a	a	a	a	a	a	a	a	b
IWB44944	b	b	b	b	a	b	b	b	b	b	b	b	b	b	b	b	a	a	b	b	b	b	b	b	b	b	b	a	a	b	a	b	b	b	b	a	b	b	b	b	b	b	b	b	b	b	b	b	b
IWB25056	b	a	a	b	a	b	b	a	b	b	b	a	a	b	a	b	a	a	b	a	a	a	b	b	b	b	b	a	a	b	a	b	b	b	b	a	b	b	b	b	b	a	a	b	b	b	b	b	a
IWB50829	b	a	a	a	b	a	a	a	a	a	a	a	a	a	b	a	b	b	a	b	b	a	a	a	a	a	a	b	b	a	b	a	a	a	a	b	a	a	a	a	a	a	a	a	a	a	b	a	a
IWA3029	b	a	b	a	a	a	a	a	a	b	b	a	b	b	b	a	a	a	a	a	a	a	b	b	b	b	b	a	b	a	b	a	a	a	a	b	a	a	b	a	a	a	a	a	a	a	a	b	b
IWB34414	b	b	a	a	b	a	a	b	a	a	a	a	b	a	a	a	a	a	a	b	a	b	b	b	a	b	b	a	a	b	b	a	b	b	a	b	b	a	b	b	b	a	a	b	b	a	a	a	b
IWB45457	-	b	b	b	b	a	a	b	b	a	b	b	a	a	b	b	b	b	a	b	b	b	b	b	b	a	b	b	b	b	b	a	a	a	b	b	b	b	b	b	b	b	a	b	b	a	b	a	a
IWB58130	-	a	a	b	b	a	a	b	b	a	b	b	a	a	b	b	b	b	a	b	b	b	b	a	b	a	b	b	b	a	b	b	b	b	b	b	b	a	b	b	b	b	b	b	b	b	b	b	b
IWB67355	a	b	a	b	b	b	a	b	b	a	a	b	b	b	a	b	b	b	b	b	b	b	b	b	b	b	b	b	a	b	b	b	b	b	b	b	b	b	b	b	a	b	b	a	a	b	a	b	b
IWB71319	a	b	a	a	b	a	a	b	b	b	a	a	a	a	b	b	a	a	b	b	a	b	a	a	a	a	b	a	a	b	b	a	a	a	b	a	a	b	a	a	b	a	b	b	a	b	b	b	b
IWB50363	b	b	b	a	a	b	b	a	b	b	b	a	b	b	b	a	a	a	b	a	b	b	a	a	a	b	a	a	a	b	b	b	b	b	a	a	a	b	a	a	a	a	b	b	b	a	a	b	b
IWB23026	b	b	b	b	b	a	a	b	b	a	a	b	a	b	b	a	b	b	a	b	a	b	a	a	a	b	b	a	b	a	a	b	b	b	b	b	b	b	b	b	b	b	b	b	a	b	b	b	b
IWB65023	b	a	b	a	b	a	a	b	b	b	b	b	a	a	a	a	a	a	a	b	b	a	a	a	a	a	a	b	b	a	b	b	b	b	a	a	a	b	b	b	b	b	b	b	b	b	b	b	a
IWB44963	a	b	b	a	a	a	a	b	a	b	b	b	b	b	b	a	a	a	a	b	b	a	b	b	b	b	a	b	b	b	b	a	b	b	b	b	a	b	b	b	b	b	b	b	b	b	b	a	b
IWB35611	b	b	b	b	b	b	b	a	a	a	a	b	b	b	b	b	b	b	b	b	b	b	b	b	b	b	b	b	b	b	b	b	b	b	b	b	b	a	b	b	b	b	b	b	b	b	b	b	b
IWA7448	-	b	b	a	a	a	a	a	b	-	a	b	b	a	a	a	a	a	a	b	b	b	a	a	b	a	b	b	b	b	a	b	b	b	b	a	b	b	b	b	b	b	a	b	b	b	b	a	b
IWB52254	b	b	a	b	b	b	b	b	b	b	b	b	b	a	b	b	b	b	b	b	b	a	a	b	b	a	b	a	b	b	b	b	b	b	b	b	b	b	a	b	b	a	b	a	a	a	a	b	a
IWA4251	b	a	b	b	a	b	b	b	b	b	b	a	b	b	a	a	a	a	b	b	a	b	b	b	a	a	a	b	a	b	b	b	b	b	b	a	b	b	a	a	b	b	a	b	b	b	b	b	a
IWB72130	a	b	b	a	b	a	a	b	a	a	b	b	a	b	b	b	b	b	a	b	b	b	b	b	b	b	b	b	b	b	b	a	a	a	b	b	b	b	b	b	b	b	b	b	b	a	b	b	a
IWB21502	b	b	-	b	a	b	b	b	b	b	b	b	b	a	a	b	b	b	b	b	b	b	a	a	b	a	b	b	a	a	a	b	b	b	a	b	b	b	b	b	b	b	b	b	b	b	b	b	b
IWB1381	a	a	a	a	a	a	a	a	a	a	a	a	a	a	a	a	a	a	a	a	a	a	a	a	a	a	a	a	a	a	a	a	a	a	a	a	a	a	a	a	a	a	a	a	a	a	a	a	a
IWB65778	a	b	a	b	b	b	b	b	b	a	a	b	b	a	a	b	b	b	b	b	b	b	b	b	a	a	a	b	a	b	b	b	b	b	b	a	b	b	b	b	b	b	b	b	b	b	b	a	a
IWB72778	a	a	b	b	b	b	a	a	b	b	b	b	b	b	b	b	b	b	b	b	b	b	b	b	b	b	b	b	b	b	b	b	a	a	b	b	b	b	a	a	a	a	b	a	a	b	b	b	b
IWA3026	a	b	a	b	b	b	b	b	b	a	a	b	a	a	a	b	b	b	b	b	b	b	a	a	a	a	a	b	a	b	a	b	b	b	b	a	b	b	a	b	b	b	b	b	b	b	b	a	a
IWB41067	b	a	b	b	b	b	b	b	a	b	a	b	b	b	b	b	b	b	b	a	a	b	b	b	b	b	a	a	a	b	a	a	a	a	a	a	b	a	b	a	a	b	b	b	b	a	a	b	b
IWB27643	b	a	b	a	a	a	a	b	a	a	a	a	a	a	a	a	a	a	a	a	a	a	a	a	a	a	a	a	a	a	a	b	a	a	a	a	a	a	a	a	a	a	a	-	a	a	a	a	a
IWB21440	-	a	a	b	b	b	a	a	a	b	a	a	a	b	a	b	b	b	b	a	a	a	a	b	b	b	a	b	b	a	b	a	b	b	a	b	b	a	a	a	a	a	a	a	a	a	a	a	a
IWA3038	b	b	b	b	b	a	a	b	b	b	b	a	a	a	b	b	b	b	b	b	b	a	b	a	a	a	a	a	b	b	b	b	b	b	b	b	a	a	a	b	b	a	b	a	a	a	b	a	a
IWB32943	b	b	b	a	a	a	a	b	a	b	b	b	b	b	b	a	a	a	a	b	b	a	b	b	b	b	a	b	b	b	b	a	b	b	b	b	a	b	a	a	a	b	a	a	a	b	b	a	b
IWB31470	b	b	b	b	b	a	a	b	a	a	a	a	a	b	b	b	b	b	a	a	a	a	a	a	b	b	a	b	b	a	b	b	b	b	a	b	a	b	b	b	b	b	b	b	b	a	b	b	a
IWB48848	-	a	b	a	a	a	a	a	b	b	b	a	a	a	b	a	a	a	a	b	b	b	b	b	b	a	a	b	a	b	a	b	b	b	a	a	a	b	b	b	b	b	a	b	b	b	b	a	a
IWB28146	a	b	b	b	b	b	b	b	b	b	b	b	a	b	b	b	b	b	b	a	b	b	b	b	b	b	b	b	b	b	b	b	b	b	b	b	b	b	b	b	a	b	b	b	b	a	a	b	b
IWB14620	a	a	a	a	a	a	a	a	a	a	a	a	a	a	a	a	a	a	a	a	a	b	a	a	a	a	a	a	a	a	a	a	a	a	a	a	a	a	a	a	a	a	a	a	a	a	b	a	a
IWB35563	-	a	b	a	b	a	a	a	a	b	a	b	b	b	b	b	a	a	a	b	b	b	b	a	a	b	b	b	b	b	b	b	b	b	a	b	a	b	b	b	b	b	b	b	b	b	b	b	a
IWB8223	b	a	b	a	b	b	b	a	a	b	b	a	a	b	b	a	b	b	b	b	b	b	a	a	b	a	a	b	b	a	b	a	a	a	a	a	a	-	b	b	b	b	a	b	b	b	b	a	a
IWA3683	-	a	a	a	a	a	a	a	a	a	a	a	b	a	a	a	a	a	a	a	a	a	b	b	a	a	b	a	b	b	a	b	b	b	a	a	a	b	a	a	a	a	a	a	a	b	b	a	a
IWA8518	a	b	a	b	a	a	a	a	a	a	a	a	a	a	a	b	a	a	a	a	a	a	a	a	a	b	b	a	a	a	a	b	b	b	b	b	b	b	a	a	a	a	b	a	a	a	a	b	a
IWB9503	b	b	a	b	b	b	b	a	a	b	b	b	b	a	a	b	b	b	b	b	b	b	b	a	b	b	a	b	a	b	b	b	b	b	b	b	b	b	b	b	b	b	b	b	b	b	b	a	a
IWB46815	-	a	a	b	b	b	b	b	b	b	b	b	b	b	b	b	b	b	b	b	a	b	a	b	b	b	b	b	b	b	b	a	a	a	a	b	a	b	b	b	b	b	b	b	b	b	b	b	a
IWA5288	a	b	a	a	a	a	a	a	b	b	a	a	b	a	a	a	a	a	a	a	a	b	a	a	a	a	a	a	a	a	b	a	a	a	b	b	b	a	a	a	a	a	a	a	a	b	a	a	a
IWB3132	-	b	a	a	b	b	b	a	b	b	b	a	b	b	a	a	a	a	a	a	a	a	a	a	a	a	a	a	b	a	b	b	b	b	b	b	b	a	a	a	a	a	a	a	a	a	a	a	a
IWB68312	a	b	a	a	a	b	b	a	a	a	a	b	a	b	a	a	b	b	a	a	b	a	b	b	a	a	a	a	b	a	a	a	a	a	a	a	a	b	a	a	a	a	a	b	a	a	a	a	a
IWB10299	b	b	b	b	a	a	a	a	a	a	a	a	a	a	b	b	a	a	a	a	b	b	a	a	b	b	b	a	b	a	b	b	b	b	b	b	b	b	b	b	b	b	b	b	b	b	b	b	a
IWB11032	a	b	b	b	b	b	b	b	b	a	a	b	a	b	b	b	b	b	b	a	b	a	a	a	a	b	b	a	b	b	b	b	b	b	b	b	b	b	a	a	a	a	b	a	a	a	a	b	b
IWB73525	a	a	a	b	a	a	a	a	a	b	b	b	b	a	a	b	a	b	a	a	a	a	b	b	a	b	a	a	a	b	b	a	a	a	a	b	b	a	a	b	b	a	b	a	a	a	a	a	b
IWB75152	b	a	b	b	b	b	b	b	b	a	b	b	a	b	b	b	b	b	b	a	a	b	b	b	b	a	a	a	b	b	b	b	b	b	a	a	a	a	a	a	a	b	b	a	a	a	a	b	b
IWB41765	b	a	b	a	a	b	b	a	b	b	b	b	a	b	b	a	a	a	a	a	a	b	a	a	a	a	b	a	b	a	b	b	b	b	a	-	a	a	a	a	a	b	b	b	b	a	a	b	a
IWB29367	a	a	b	a	a	b	b	b	a	b	b	b	b	a	a	a	b	b	b	a	a	a	b	a	a	a	a	a	a	b	b	b	b	b	a	b	a	a	a	a	b	a	a	b	a	a	a	a	b
IWB46363	b	b	a	b	b	b	b	b	a	b	b	a	a	b	b	b	b	b	b	b	a	b	a	a	b	b	b	a	b	b	a	b	b	b	b	a	b	b	a	a	a	a	b	a	a	a	a	b	a
IWA7227	b	a	a	a	a	a	b	b	b	b	b	b	b	a	a	a	a	a	a	a	a	b	b	b	a	a	a	a	b	b	b	a	a	a	a	a	a	a	b	b	b	b	a	b	b	a	b	a	b
IWB61245	b	a	a	b	b	a	a	a	a	a	a	b	a	a	a	a	b	b	b	a	-	b	b	b	a	a	a	b	a	a	b	a	a	a	a	a	a	a	a	a	a	a	a	a	a	a	a	a	a
IWB50745	-	b	b	a	b	b	b	b	b	b	b	b	a	b	b	b	b	b	b	a	b	b	b	b	b	b	b	a	b	b	b	b	b	b	b	b	b	b	b	a	a	b	b	b	a	b	b	b	b
IWB54146	a	a	a	b	a	a	a	b	b	a	a	a	a	a	a	b	a	a	b	b	b	a	b	b	a	b	b	b	b	a	b	a	a	a	a	a	a	a	a	a	b	a	a	b	b	a	b	a	a
IWB12115	a	b	b	a	b	b	b	b	b	b	b	b	b	b	b	b	b	b	b	b	b	a	b	b	b	b	b	b	a	a	a	a	a	a	a	b	b	b	b	b	b	a	a	b	b	b	b	a	b
IWB10726	a	b	b	a	b	b	b	a	b	b	b	b	b	b	b	a	a	a	a	b	a	a	a	a	a	b	b	a	b	a	b	b	b	b	b	b	b	a	b	b	b	b	b	b	b	b	b	b	a
IWB10765	a	a	a	a	a	b	b	a	a	b	b	b	b	b	a	a	b	b	a	b	b	a	b	b	b	b	b	a	b	b	a	b	b	b	a	b	b	a	a	b	b	b	a	b	b	b	b	b	b
IWA6463	-	a	a	a	a	a	a	a	b	b	b	b	b	a	b	a	a	a	a	a	a	b	b	b	b	b	b	b	a	a	b	a	b	b	b	b	b	b	b	b	b	b	b	a	a	b	a	b	b
IWB71503	-	b	b	a	a	b	b	b	b	b	b	b	b	b	b	b	a	a	b	b	b	b	b	b	b	b	b	b	b	b	b	b	b	b	b	b	b	b	b	b	b	b	a	b	b	b	b	b	b
IWB64998	a	a	b	b	b	b	a	b	a	a	a	a	b	a	a	b	b	b	b	a	a	a	a	b	b	a	b	b	a	a	b	a	a	a	a	a	b	b	a	b	b	a	b	b	b	b	b	b	b
IWA674	b	b	b	b	b	a	a	b	b	a	a	a	a	a	b	b	a	a	b	a	a	b	a	a	a	a	a	a	a	a	b	a	a	a	b	a	a	b	b	a	a	a	b	a	a	a	a	a	a
IWA7911	b	a	a	b	b	b	b	a	a	b	b	b	a	b	b	b	b	b	b	a	b	a	a	b	a	a	b	a	b	a	a	b	b	b	a	a	a	b	b	b	b	b	a	b	-	b	b	b	b
IWB50052	b	b	b	a	b	b	b	a	b	b	b	b	b	b	b	a	a	a	b	b	b	b	b	b	b	b	b	b	b	b	b	b	b	b	b	b	a	b	a	a	a	b	b	b	a	a	a	b	b
IWB39750	b	b	b	b	b	b	b	b	b	b	b	b	b	a	b	a	b	b	b	b	b	b	b	b	b	b	a	b	a	b	b	b	b	b	b	a	b	b	b	b	b	b	b	b	b	b	b	b	b
IWB71748	a	b	b	b	b	b	b	b	b	b	b	b	b	b	b	b	b	b	b	b	a	b	b	b	b	b	b	b	b	b	b	b	b	b	b	b	b	b	b	b	b	b	b	b	b	b	b	b	b
IWA6894	a	a	b	a	a	b	b	a	a	a	b	a	a	a	a	a	a	a	a	a	a	a	a	b	b	a	a	a	a	a	b	a	a	a	a	a	b	a	a	a	a	a	a	a	a	a	a	a	a
IWB5368	a	b	a	b	b	b	b	b	a	b	b	a	b	a	a	b	b	b	b	a	a	a	a	a	a	a	a	a	a	b	a	b	a	a	a	b	b	a	a	a	a	a	a	a	a	a	a	b	b
IWB49401	-	a	a	a	a	a	a	a	a	a	a	b	a	b	a	a	a	a	a	a	a	a	a	a	b	a	a	a	a	a	a	b	b	b	a	a	a	a	a	a	a	a	a	a	a	a	a	a	a
IWB67782	b	b	b	b	b	b	b	b	b	b	b	b	b	b	b	b	b	b	b	a	a	a	b	a	b	b	b	a	a	b	b	b	b	b	b	b	b	a	a	a	a	a	b	a	a	a	b	b	b
IWB25252	a	-	a	a	b	a	a	a	b	b	b	b	a	a	a	a	a	a	a	b	a	b	a	a	b	a	a	a	b	a	b	a	b	b	a	a	a	a	a	a	a	a	b	a	a	a	a	b	b
IWB44503	a	a	a	a	a	b	b	a	a	a	a	b	b	a	b	a	a	a	a	b	b	a	b	b	a	a	a	a	a	b	b	a	a	a	a	a	b	a	a	b	b	a	b	a	a	b	a	b	b
IWA3411	-	b	a	b	b	b	b	b	a	b	-	a	b	b	a	b	b	b	b	b	b	b	b	a	b	b	a	b	b	a	a	a	a	a	b	a	b	a	b	b	b	a	b	b	b	b	a	b	a
IWB64256	a	a	a	a	b	a	a	a	a	a	a	b	b	b	a	a	a	a	b	b	a	a	a	a	-	-	a	b	b	b	a	a	a	a	a	b	a	a	a	a	a	a	a	a	a	b	a	a	a
IWB10850	b	a	a	a	a	b	b	b	a	a	b	b	b	a	a	a	a	a	a	b	b	a	a	b	a	a	a	b	a	b	b	a	a	a	a	a	a	a	a	a	a	b	b	b	b	b	b	b	b
IWA5098	b	a	b	a	a	a	a	b	b	a	b	a	a	b	b	a	a	a	a	a	a	a	a	a	b	a	a	b	b	a	b	b	b	b	a	a	a	a	b	b	b	a	a	a	a	a	a	a	b
IWB72957	b	b	a	a	a	a	a	b	a	a	b	a	b	a	a	a	a	a	a	a	a	a	a	b	a	b	a	a	a	a	a	b	b	b	b	b	b	a	a	a	a	a	a	a	a	a	b	a	b
IWB25753	-	a	b	a	a	a	a	a	a	a	a	a	a	a	b	a	a	a	a	b	a	a	a	a	a	a	a	b	b	a	a	a	a	a	a	a	a	a	a	a	a	b	a	a	a	a	b	b	a
IWB19578	b	a	b	a	a	a	a	a	b	a	a	b	a	b	b	a	a	a	a	a	a	a	a	a	a	a	b	a	a	a	a	b	b	b	a	b	a	a	a	a	a	b	a	a	a	a	b	a	a
IWB13932	b	b	a	a	a	a	a	a	a	a	a	a	a	b	a	a	a	a	a	a	a	a	a	a	a	b	a	a	b	a	a	b	b	b	a	a	a	a	a	b	b	a	a	a	a	a	b	a	a
IWA2927	-	b	b	a	a	b	b	a	a	b	b	b	a	b	b	a	b	b	a	a	a	b	a	a	b	b	b	a	b	b	a	b	b	b	b	b	a	b	a	a	a	a	b	a	a	a	a	b	a
IWB14592	b	b	a	b	a	b	b	b	b	b	b	b	a	a	b	b	b	b	a	a	a	a	b	b	a	b	b	a	a	a	a	a	a	a	b	b	a	a	a	a	a	a	a	a	a	a	b	a	a
IWB8644	b	a	b	a	a	a	a	b	b	a	b	a	b	b	a	a	a	a	a	a	b	a	a	b	b	a	a	b	b	b	b	a	a	a	a	a	a	a	a	b	b	a	b	a	a	a	b	a	a
IWB28338	b	b	b	b	b	b	b	a	b	b	b	b	b	b	b	b	b	b	b	b	b	b	b	b	b	a	b	b	b	b	b	b	b	b	a	a	a	b	b	b	b	b	b	b	b	b	a	b	a
IWA8595	-	b	a	b	b	b	b	b	a	b	b	b	b	a	b	b	b	b	b	b	a	b	b	a	b	b	b	b	a	b	b	a	a	a	b	b	b	a	a	a	a	a	b	a	a	b	a	b	b
IWB71705	a	b	a	a	b	a	a	a	b	b	a	a	a	a	a	a	a	a	b	b	a	b	b	a	a	a	b	b	a	a	b	a	a	a	b	a	b	b	b	a	a	b	a	a	a	a	b	a	a
IWB53777	a	b	a	b	a	b	b	a	a	b	b	a	a	a	a	b	b	b	b	a	b	b	b	b	a	a	a	b	a	a	a	a	a	a	b	b	b	b	b	b	b	b	a	b	b	a	b	a	a
IWB73415	b	b	b	b	b	b	b	a	a	b	a	b	b	b	b	b	b	b	b	b	b	b	b	b	b	b	b	b	a	a	a	b	b	b	b	b	b	b	b	b	b	b	b	b	b	b	b	b	b
IWB62830	a	a	a	a	a	a	a	b	a	a	a	a	b	a	a	a	a	a	a	a	a	a	a	a	a	a	a	a	a	a	a	a	a	a	a	a	a	a	a	a	a	a	a	a	b	b	a	a	a
IWB1391	a	b	b	a	a	b	b	b	b	b	a	b	b	b	b	a	a	a	a	a	b	b	b	b	b	a	b	b	b	b	b	b	b	b	b	b	a	a	b	b	b	b	b	b	b	b	b	a	b
IWB42059	b	b	a	a	a	b	b	b	b	b	b	b	b	a	a	a	a	a	b	a	b	a	b	b	a	b	a	a	b	b	b	a	a	a	b	b	b	b	b	b	-	b	b	b	b	b	b	b	a
IWA921	b	a	b	b	b	b	b	a	b	b	a	b	b	b	b	b	b	b	b	b	b	a	b	b	a	a	b	b	b	b	b	a	a	a	a	b	a	a	b	b	b	b	a	b	b	a	b	a	b
IWB57137	b	b	a	b	b	b	b	b	a	b	b	a	b	b	a	b	b	b	b	b	a	b	b	b	b	b	b	b	b	a	b	a	a	a	b	b	a	b	b	b	b	b	b	b	b	b	a	b	a
IWA5055	b	a	a	a	a	a	a	a	a	a	-	b	a	b	b	a	a	a	a	b	b	a	a	b	b	a	a	a	a	b	b	b	a	a	a	a	a	b	a	a	a	b	b	b	b	b	b	b	b
IWA5035	-	a	b	b	a	b	b	b	a	b	b	b	b	b	b	b	b	b	b	a	a	a	b	b	b	b	b	a	b	b	a	b	b	b	a	b	b	b	a	a	a	b	b	a	a	b	b	b	b
IWB13073	b	a	a	a	a	a	a	a	a	a	a	a	a	a	a	a	a	a	a	a	b	a	a	a	a	a	a	a	a	a	a	a	a	a	a	a	a	a	b	b	b	a	a	a	b	b	a	a	a
IWB14335	-	a	a	b	a	a	a	a	b	a	a	a	b	a	b	a	a	a	a	b	a	b	a	a	a	a	a	a	a	a	a	a	b	a	a	a	a	b	a	b	b	a	a	a	b	b	a	a	a
IWB55341	b	b	a	a	b	a	a	a	a	a	a	a	a	b	a	a	b	b	b	a	a	b	b	b	b	a	a	a	a	a	a	a	a	a	a	a	a	a	b	a	a	a	a	a	b	a	a	b	a
IWB20550	b	b	b	a	a	a	a	a	a	a	a	a	a	a	a	a	a	a	a	a	a	b	a	a	a	a	b	b	a	b	b	b	b	b	b	a	a	a	a	b	b	b	a	b	a	a	a	a	a
IWB30573	-	b	a	b	a	a	a	a	a	b	b	a	a	b	b	a	a	a	a	b	b	a	a	b	b	a	b	a	a	b	a	b	b	b	a	b	b	b	a	a	a	a	b	b	b	b	b	b	a
IWB11745	a	a	a	a	a	a	a	b	b	a	a	a	b	b	a	b	a	a	a	b	b	a	b	b	b	b	a	b	b	a	b	a	a	a	a	a	a	b	b	b	b	b	b	b	b	b	b	a	a
IWB17924	b	b	-	a	a	a	a	a	b	a	a	a	a	b	-	a	b	b	a	b	b	a	a	b	a	a	b	b	b	a	a	a	a	a	b	b	b	a	b	b	b	b	a	b	b	b	b	b	a
IWB22212	b	a	b	a	a	a	a	a	a	a	a	a	a	b	b	a	a	a	a	a	a	a	a	a	a	a	a	a	a	a	a	a	a	a	b	a	a	b	a	a	a	a	a	a	a	a	a	a	a
IWB28868	-	a	b	b	b	b	b	b	a	a	b	b	b	a	b	b	a	a	b	a	b	b	b	b	b	b	a	a	a	b	a	b	a	b	b	a	b	a	a	a	a	a	a	a	a	a	b	a	b
IWA881	b	b	b	b	b	b	b	b	a	b	b	b	a	a	b	b	b	-	b	b	a	a	b	a	a	b	a	b	b	b	b	b	b	b	b	b	b	a	b	b	b	b	b	b	b	b	b	b	a
IWB74204	b	b	b	b	b	b	b	a	a	b	b	b	a	a	b	a	b	b	b	a	a	b	a	a	a	a	b	a	a	b	a	b	b	b	b	b	b	a	a	a	a	a	a	a	a	a	a	b	b
IWB26633	-	b	b	b	b	b	b	b	b	b	b	b	b	b	a	b	b	b	b	a	b	b	b	b	b	b	b	a	b	b	b	a	a	a	b	b	b	b	a	b	b	b	b	a	a	b	b	b	b
IWB9080	b	a	b	a	b	b	b	a	a	b	a	b	b	a	a	b	b	b	b	a	b	a	a	a	a	a	a	b	a	b	a	b	b	b	a	a	a	a	b	b	b	b	a	b	b	b	b	a	b
IWB24436	b	a	a	a	a	a	a	a	a	a	a	a	a	a	a	a	a	a	a	b	a	a	a	a	a	a	a	a	a	a	a	a	a	a	a	a	a	a	a	a	a	a	a	a	a	a	a	a	a
IWB30198	b	a	b	b	b	b	b	a	b	b	a	b	b	b	b	b	b	b	b	b	b	b	b	b	a	b	b	b	b	a	b	b	b	b	a	b	b	b	a	b	-	b	b	b	a	b	b	b	b
IWA6004	b	b	a	a	a	a	a	a	b	a	a	b	b	a	b	a	a	a	a	a	a	a	a	a	b	a	b	a	a	a	b	b	b	b	a	b	a	b	a	a	-	a	a	a	a	a	a	a	b
IWB65016	a	a	a	a	b	a	a	a	a	a	a	a	a	a	b	a	a	a	b	b	a	a	a	a	a	a	a	a	a	b	a	a	a	a	a	b	a	a	a	a	a	a	a	a	a	a	a	b	a
IWB59239	b	b	b	b	b	a	a	b	a	b	a	a	b	b	b	b	b	b	b	b	b	b	b	b	b	a	b	b	b	b	b	b	b	b	b	b	a	b	b	b	b	b	b	b	b	b	b	b	b
IWB10036	b	b	b	a	a	a	a	a	b	a	a	b	b	b	b	b	a	a	a	b	b	b	a	a	b	b	b	b	b	b	b	b	b	b	a	b	a	b	b	b	b	b	b	b	b	b	b	b	b
IWB1294	a	b	b	a	a	a	a	a	a	a	a	b	b	b	b	a	a	a	a	b	-	a	b	a	b	b	a	b	b	a	b	b	b	b	a	a	a	b	b	b	b	b	b	a	a	a	a	a	b
IWA6866	-	a	a	a	a	a	a	b	b	a	b	a	b	b	a	a	a	a	a	a	a	b	b	b	b	b	a	b	b	b	b	a	a	a	b	b	b	b	b	b	b	b	b	b	b	b	b	b	b
IWB28082	b	b	b	b	b	b	b	b	a	b	b	b	a	b	b	b	b	b	b	b	a	a	b	b	b	b	b	b	b	b	b	b	b	b	a	a	b	a	a	b	a	b	a	b	a	a	a	b	b
IWB72581	a	b	b	b	b	b	b	b	b	b	b	b	b	b	b	b	b	b	b	b	a	b	b	b	b	b	b	a	b	b	b	a	a	a	b	b	b	a	a	b	b	a	b	b	b	b	a	b	b
IWB27404	a	a	b	b	b	b	b	b	b	b	b	b	b	b	b	b	b	b	b	a	a	b	b	a	b	b	b	a	b	b	b	b	b	b	b	b	b	a	a	b	a	a	b	a	b	a	a	b	b
IWB53021	b	a	b	a	a	a	a	a	a	b	b	a	b	b	a	a	a	a	b	b	b	b	a	b	a	a	b	b	b	a	b	b	b	b	b	b	a	b	b	b	b	a	b	b	b	b	b	b	b
IWB225	-	b	b	a	a	a	a	a	b	b	b	b	b	b	b	a	a	a	a	b	b	b	a	b	b	b	b	a	b	a	b	b	b	b	b	b	b	b	b	b	b	b	b	b	b	b	b	b	b
IWB26913	a	a	a	b	b	b	b	b	b	b	b	a	b	a	a	b	b	b	b	a	a	a	a	a	a	b	b	a	a	b	a	a	a	a	b	b	b	a	a	b	a	a	a	a	a	a	a	a	a
IWB65578	a	a	b	b	b	b	b	b	b	b	b	a	b	b	a	b	b	b	b	b	b	b	b	b	b	b	b	b	b	a	b	a	a	a	b	a	b	a	a	b	b	b	b	b	b	b	a	a	a
IWA3691	b	b	a	a	b	a	a	a	a	a	a	b	a	b	a	a	a	a	a	b	a	b	a	a	a	a	a	b	b	a	b	a	a	a	a	a	a	a	a	b	b	a	a	b	b	a	a	a	a
IWB29946	b	a	a	a	a	b	b	a	a	b	a	a	b	b	a	a	a	a	a	a	a	a	a	a	a	a	a	b	b	a	a	a	a	a	a	a	a	b	b	a	b	b	a	b	b	a	b	a	a
IWA8387	b	b	b	a	b	a	a	a	b	a	a	b	b	b	b	a	a	a	a	b	b	a	b	b	b	b	a	b	a	b	a	b	b	b	a	a	a	b	b	b	b	b	b	b	b	b	b	b	a
IWB58341	a	a	a	a	a	a	a	a	a	a	a	a	a	a	a	a	a	a	a	b	b	a	a	b	a	a	a	b	a	a	a	a	a	a	a	a	a	b	b	a	b	b	a	b	a	b	b	a	a
IWB70597	a	b	b	b	b	b	b	b	b	b	b	b	b	b	b	b	b	b	b	a	b	b	b	b	b	a	a	a	a	b	b	a	b	b	b	b	b	b	b	b	b	b	b	b	a	b	a	b	b
IWB53562	b	a	b	a	a	a	a	b	b	a	b	a	b	b	b	a	b	b	a	b	a	b	b	b	b	b	b	a	b	a	b	b	b	b	b	a	b	a	a	b	-	b	b	b	b	b	a	b	a
IWB22039	b	b	b	b	b	b	b	b	b	b	b	b	b	b	b	b	b	b	b	b	b	b	b	b	b	b	b	a	b	b	b	b	b	b	b	b	b	a	b	b	b	b	b	b	b	a	a	b	b
IWB27867	a	b	a	b	b	b	b	b	a	b	b	a	b	b	b	b	b	b	b	b	b	b	b	b	a	a	a	b	b	b	b	a	a	a	b	b	b	b	b	b	b	b	b	b	b	b	b	b	a
IWB26552	b	a	b	b	b	b	b	b	b	a	b	b	b	b	b	b	b	b	b	b	b	b	b	a	b	a	b	b	b	b	b	b	b	b	b	b	a	b	b	a	b	a	b	b	b	b	b	b	a
IWB34143	b	b	a	a	a	a	a	a	a	a	a	a	a	a	a	a	a	a	a	a	a	a	a	a	b	a	a	a	a	a	a	a	a	a	a	a	a	a	b	b	a	b	a	b	b	a	a	a	a
IWB35552	b	a	b	b	b	a	a	a	a	a	a	a	a	a	a	a	a	a	a	a	a	b	b	b	a	b	b	a	a	a	a	a	a	a	a	a	a	a	a	a	a	a	a	a	a	a	a	a	a
IWA334	b	b	b	b	b	b	b	b	b	b	b	b	b	b	b	b	b	b	b	b	b	a	b	b	b	b	b	b	b	b	b	b	b	b	b	b	b	b	b	b	b	b	b	b	b	b	b	b	b
IWB8346	a	b	a	b	b	b	b	b	a	a	a	b	a	b	a	b	b	b	b	a	a	b	a	a	a	a	b	a	b	b	a	a	a	a	b	a	a	b	a	a	a	a	a	a	a	a	a	b	a
IWB26268	b	b	a	a	a	a	a	a	b	a	b	a	b	b	a	a	a	a	a	a	a	b	b	a	b	b	a	a	b	b	a	b	b	b	b	a	b	b	a	a	a	a	a	a	a	a	a	a	b
IWB34204	a	b	b	b	b	b	b	b	b	b	b	b	a	b	b	b	b	b	b	b	b	b	a	b	b	b	b	b	b	a	b	-	-	-	b	b	b	b	b	b	b	b	-	b	b	b	b	b	b
IWB26581	b	b	b	a	a	b	b	b	b	b	b	b	b	b	b	b	b	b	a	b	b	a	b	b	-	b	b	b	b	b	a	b	a	a	b	b	b	b	b	b	b	b	b	b	b	a	b	b	b
IWB13489	b	a	-	b	b	b	b	b	a	b	b	b	b	a	a	b	b	b	b	a	a	b	a	b	b	b	a	a	a	b	b	b	a	a	b	a	a	b	b	a	a	a	a	a	a	a	a	a	a
IWA141	-	b	a	a	a	b	b	a	b	a	a	b	b	b	b	a	a	a	a	b	a	b	a	b	-	b	b	b	b	b	a	a	a	a	b	b	b	a	b	a	b	a	a	b	b	a	b	b	a
IWB13172	a	b	a	b	b	b	b	b	b	-	b	a	a	a	a	b	b	b	b	b	a	a	b	b	a	a	b	a	b	a	b	a	a	a	a	b	b	a	a	a	a	a	a	a	a	a	a	a	b
IWA3892	a	a	a	a	a	a	a	a	a	b	b	a	a	a	a	a	a	a	a	a	b	a	a	a	a	a	a	a	a	a	b	b	b	b	a	a	b	a	b	b	b	a	a	b	b	b	b	a	a
IWA6731	a	a	a	a	a	b	b	a	b	a	a	a	b	a	b	a	a	a	a	a	a	b	b	b	b	a	a	b	b	b	a	b	b	b	b	b	b	b	b	a	a	b	a	a	b	a	b	a	b
IWB44485	a	a	a	a	a	a	a	a	a	b	a	a	b	a	a	a	a	a	a	b	b	b	a	b	b	a	b	b	a	b	b	b	b	b	a	b	b	b	b	b	b	b	b	b	b	b	b	b	b
IWB21824	a	a	a	b	b	a	a	b	b	a	b	a	a	b	a	b	b	b	b	a	b	b	a	a	a	a	a	b	b	a	a	a	a	a	b	a	a	a	b	b	b	b	b	b	b	b	b	a	a
IWB43631	a	a	a	a	a	a	a	a	a	a	a	a	a	b	a	a	a	a	a	a	a	a	a	a	b	a	a	a	a	a	a	a	a	a	a	a	b	-	b	b	a	b	b	b	b	b	a	a	a
IWB64308	a	a	a	a	a	-	-	a	a	a	a	a	a	a	a	a	a	a	a	a	a	a	a	a	a	a	a	a	a	a	b	a	a	a	a	a	a	b	a	a	a	a	a	a	a	a	a	a	-
IWB7314	-	b	a	b	b	a	a	b	a	a	b	a	a	b	a	b	b	b	b	b	a	a	a	b	b	a	a	b	b	b	a	a	a	a	a	a	a	b	b	a	b	a	a	a	b	a	b	b	a
IWB46448	-	a	a	a	a	a	a	a	a	a	a	b	a	b	b	a	a	a	a	a	b	a	a	b	b	a	a	b	a	b	b	b	b	b	a	b	a	a	b	b	b	b	b	b	b	b	b	a	b
IWA6684	b	a	b	a	a	a	a	a	b	a	a	a	b	a	b	a	a	a	a	a	a	a	a	a	a	a	a	b	a	a	a	b	b	b	b	a	b	a	a	a	b	a	a	a	b	a	b	b	a
IWB29959	b	b	b	b	b	b	b	b	a	a	b	b	b	b	a	b	b	b	b	b	a	a	b	b	b	b	a	a	b	b	a	b	b	b	a	a	a	a	b	b	b	a	a	b	a	a	a	a	b
IWB8152	a	b	b	b	b	a	a	b	b	a	a	a	a	b	b	b	b	b	b	b	b	a	a	a	a	b	b	b	b	-	a	b	b	b	a	b	b	a	a	b	b	b	b	a	b	b	b	b	b
IWB7144	b	b	b	a	a	a	a	a	a	a	a	a	a	b	b	a	a	a	a	b	b	a	a	a	b	b	b	b	b	b	a	a	b	b	a	b	b	a	a	b	b	b	b	b	b	b	b	b	b
IWB8898	b	a	b	a	b	b	b	b	a	b	a	a	a	b	b	b	b	b	b	a	a	a	a	a	a	b	b	a	b	b	b	b	b	b	a	b	a	a	a	b	a	b	b	a	a	a	b	b	b
IWB72053	b	a	b	a	a	b	b	a	a	b	a	a	a	a	a	a	a	a	a	a	a	a	a	a	a	a	a	a	a	a	a	a	a	a	a	a	a	a	a	a	a	a	a	a	a	a	a	a	a
IWB7641	b	b	b	a	a	a	a	a	a	a	b	b	b	a	a	a	a	a	a	a	a	a	b	b	-	a	a	a	a	-	b	b	b	b	b	b	b	a	a	a	a	a	a	b	a	a	a	a	a
IWA2586	a	b	b	b	b	b	b	b	a	b	b	b	b	b	b	b	b	b	b	b	a	a	b	b	b	b	b	a	a	b	b	b	b	b	a	b	b	b	b	a	a	a	a	a	b	a	b	b	b
IWB1981	a	a	a	a	a	a	a	a	b	b	b	a	a	a	a	a	a	a	a	a	a	a	a	a	a	a	a	a	a	a	a	a	a	a	b	a	a	a	a	a	b	a	a	b	b	b	a	a	a
IWB22868	-	b	a	b	a	a	a	b	a	b	b	b	b	b	a	b	a	a	b	a	b	a	a	b	b	b	a	a	a	b	a	b	a	a	b	a	b	a	a	a	a	a	b	a	a	a	a	a	b
IWB74185	a	b	a	b	b	a	a	b	b	b	b	a	a	b	a	b	b	b	b	a	a	b	a	b	a	b	a	a	a	a	a	a	a	a	b	a	a	a	a	a	a	a	a	a	a	a	a	a	b
IWB7436	b	a	a	a	a	b	b	a	a	a	b	a	a	a	a	a	a	a	a	a	a	a	a	b	b	a	a	b	a	a	a	b	b	b	a	a	a	a	a	a	a	a	a	a	a	a	a	b	b
IWB10529	a	b	a	b	a	a	a	b	a	a	b	a	a	a	a	b	a	a	a	a	a	b	a	b	b	b	a	a	a	b	b	a	a	a	a	a	a	b	b	a	a	a	a	a	a	b	a	a	a
IWB73403	a	a	a	a	a	a	a	a	a	a	a	a	a	a	a	a	a	a	a	a	a	a	a	a	a	a	a	b	a	a	a	a	a	a	a	a	b	a	b	b	b	b	b	b	a	b	b	b	a
IWB25890	a	a	a	b	b	a	a	b	b	a	b	b	b	b	b	b	b	b	b	b	b	b	b	a	b	b	b	b	b	b	b	b	b	b	b	b	b	b	b	b	b	b	b	b	b	a	b	b	b
IWA3146	a	a	a	a	a	-	-	a	b	b	-	a	a	a	b	a	a	a	a	a	a	b	a	a	a	a	-	a	a	a	a	a	a	a	a	a	a	a	a	a	a	a	a	a	a	a	a	a	a
IWB38151	-	a	a	-	b	b	b	b	a	b	b	b	a	b	b	b	b	b	a	a	a	a	a	a	a	a	b	a	a	a	a	b	b	b	a	a	a	a	a	b	a	b	b	a	a	a	a	a	a
IWB14010	a	a	b	a	b	b	b	a	a	b	-	b	b	b	a	a	b	b	a	b	b	a	a	a	a	a	b	a	b	a	a	a	a	a	b	b	a	a	a	a	a	a	a	a	a	a	a	b	a
IWB73714	b	b	b	a	a	a	a	b	a	b	a	a	b	b	b	b	a	a	a	a	a	a	a	b	-	b	b	a	b	-	b	a	a	a	a	b	a	a	a	b	b	a	a	b	a	a	a	b	b
IWA3095	b	b	b	b	b	b	b	b	a	b	b	b	b	b	b	b	b	b	b	b	b	b	b	b	b	b	b	b	b	b	b	-	b	b	b	a	b	b	b	b	b	b	b	b	b	-	b	b	b
IWB9425	b	b	b	b	b	b	b	b	b	b	a	b	a	a	b	b	b	b	b	b	b	b	a	a	a	b	b	b	b	b	b	b	b	b	b	b	b	a	b	b	b	b	b	b	b	b	b	b	b
IWB3983	b	b	b	b	b	b	b	b	b	a	b	b	b	a	b	b	b	b	b	a	b	b	a	b	b	b	a	b	b	b	b	b	b	b	a	b	b	b	b	b	b	b	b	b	b	b	b	a	b
IWB73358	b	b	b	b	b	b	b	b	b	b	b	b	b	b	b	b	b	b	b	b	b	a	b	b	b	b	b	a	b	b	a	b	a	a	b	b	b	b	b	b	b	b	b	b	b	a	b	b	b
IWB72161	a	b	b	b	b	b	b	b	b	b	b	b	b	b	b	b	b	b	b	b	a	a	b	b	b	b	b	a	b	a	b	a	b	b	b	b	b	a	b	b	b	b	b	b	b	b	b	b	b
IWB7767	-	a	a	b	a	b	b	b	a	b	b	b	a	a	a	b	b	b	b	a	a	b	a	b	a	b	b	a	a	a	a	b	b	b	b	b	b	b	a	a	a	a	a	a	a	a	a	a	a
IWB58159	b	b	-	b	b	a	a	b	b	b	b	b	b	b	b	a	b	b	b	b	b	b	b	b	b	b	b	b	b	b	b	b	b	b	b	b	b	b	b	b	b	b	b	b	b	b	b	b	b
IWB28591	-	b	b	b	a	b	b	b	a	b	b	a	a	a	b	b	b	b	b	a	a	a	a	a	a	a	a	a	a	a	a	a	a	a	b	a	b	a	b	a	b	a	b	a	a	a	a	b	a
IWB25795	a	a	b	a	b	a	a	a	b	a	a	b	b	a	b	a	a	a	b	b	b	a	b	b	a	a	b	b	a	b	b	b	b	b	a	b	a	b	a	a	a	b	a	b	a	a	a	b	b
IWB34572	b	b	b	b	b	b	b	a	a	b	b	b	b	a	a	b	b	b	b	b	b	b	b	a	b	a	b	b	a	a	b	b	b	b	a	b	a	a	b	b	b	b	b	b	b	b	b	a	b
IWB60039	b	b	b	b	b	b	b	b	b	b	b	b	a	b	b	b	b	b	b	b	b	b	b	b	b	b	b	b	b	b	b	b	b	b	a	b	a	b	b	b	b	b	b	b	b	b	b	b	b
IWA3294	b	b	b	b	b	b	b	a	b	b	b	b	b	b	a	b	b	b	b	b	b	b	b	b	b	a	b	b	b	b	a	b	b	b	b	b	b	b	b	b	b	b	a	b	b	b	b	a	b
IWA5378	a	b	a	b	b	a	a	b	a	a	b	a	a	a	a	b	a	a	b	a	a	b	a	a	b	b	b	a	b	a	b	a	a	a	a	b	a	a	a	a	a	a	b	a	a	a	a	b	a
IWB48698	-	a	a	a	a	a	a	a	a	b	a	a	a	a	a	a	b	b	a	b	b	a	a	a	-	a	a	b	a	a	a	a	a	a	a	a	a	a	a	a	a	b	a	b	a	b	b	a	b
IWB5684	b	b	a	a	a	a	a	a	a	a	a	a	a	a	a	a	a	a	a	a	a	a	a	a	a	a	a	a	a	a	a	a	a	a	a	a	a	a	a	a	a	a	a	a	a	a	a	a	a
IWB28709	b	b	b	b	b	b	b	b	a	b	b	b	b	b	b	b	b	b	b	b	a	b	a	b	a	b	b	b	b	a	b	a	a	a	b	b	b	a	a	a	a	a	b	a	a	a	b	b	b
IWA1689	-	a	b	b	a	b	b	b	b	b	b	b	b	b	b	b	b	b	b	b	a	b	b	b	b	b	b	b	b	a	b	a	a	a	b	b	b	b	a	a	a	b	b	b	a	b	b	b	b
IWB26200	a	b	a	a	a	b	b	b	b	b	b	a	a	b	a	b	b	b	b	a	a	a	b	b	b	a	b	b	a	a	b	a	a	a	b	a	a	a	a	a	a	a	a	b	a	b	a	b	b
IWB65453	-	a	a	a	a	a	a	b	b	a	a	a	b	a	b	a	a	a	a	b	b	a	a	a	a	b	a	b	a	a	b	a	a	a	a	b	b	a	b	b	b	a	b	b	b	b	b	b	b
IWB48969	-	b	b	b	b	b	b	b	b	a	a	b	a	b	b	b	b	b	b	b	b	a	b	b	b	b	b	b	b	b	a	b	b	b	a	a	a	b	b	b	b	b	b	b	b	b	b	b	b
IWB26871	b	a	b	b	b	b	b	b	b	b	b	b	b	b	b	b	b	b	b	b	b	a	b	b	b	b	b	b	b	b	b	b	b	b	a	a	b	a	b	a	a	a	b	b	b	b	a	b	b
IWB23232	-	b	b	b	b	b	b	b	a	a	a	a	b	b	b	b	b	b	b	b	b	b	a	b	b	b	a	a	b	b	b	a	a	a	a	b	b	b	a	a	a	a	b	a	a	a	b	b	b
IWB4667	b	a	a	b	b	b	b	b	a	a	a	a	a	a	a	b	b	b	a	a	a	a	a	a	a	a	a	a	a	a	b	a	a	a	a	a	a	b	b	b	b	b	a	b	b	b	b	a	a
IWB67261	b	b	b	b	a	b	b	b	b	b	b	b	b	b	b	b	b	b	b	a	b	b	b	b	b	b	b	b	b	b	b	b	b	b	b	b	b	b	b	b	b	a	b	a	b	b	a	b	b
IWB57118	b	b	a	a	a	a	a	a	a	b	b	a	b	a	a	a	a	a	a	a	a	b	a	a	a	a	a	a	a	a	b	a	a	a	b	b	b	a	a	a	a	a	a	a	a	a	a	a	a
IWA8513	b	b	b	b	b	b	b	b	b	b	b	b	b	b	b	b	b	b	b	b	a	b	a	b	b	b	a	b	b	b	a	b	b	b	b	b	b	b	a	b	b	a	b	a	b	a	a	b	b
IWB61793	a	b	b	b	b	b	b	b	a	b	b	b	b	b	b	b	b	b	b	a	a	b	b	b	b	b	b	a	b	b	a	b	b	b	b	b	b	b	a	b	b	a	b	a	b	a	a	b	b
IWB31015	b	b	b	b	a	a	a	b	b	b	b	b	b	a	b	b	b	b	b	a	a	b	b	b	b	a	b	b	a	b	b	b	b	b	b	b	a	b	a	b	-	b	b	b	a	b	b	b	b
IWB65522	b	b	b	a	a	b	b	a	a	b	a	b	b	a	a	a	a	a	a	b	a	b	b	b	b	b	b	b	b	b	b	b	b	b	b	b	b	b	b	b	a	b	b	b	b	b	a	b	b
IWB2281	b	a	a	a	a	a	a	a	b	b	b	a	b	a	a	a	a	a	a	a	a	a	b	a	a	a	a	a	a	b	a	a	a	a	a	a	a	a	a	a	a	a	a	a	a	a	a	a	a
IWB53288	-	a	a	a	a	a	a	a	b	a	a	a	a	a	a	a	a	a	a	b	b	a	a	a	a	a	a	b	a	a	b	a	a	a	a	a	a	a	a	a	a	b	a	b	a	b	b	a	a
IWB22995	-	a	a	a	a	a	a	a	a	a	a	a	a	a	a	a	a	a	a	b	a	a	a	a	b	a	a	a	a	b	a	a	a	a	a	b	a	a	a	a	a	a	b	a	a	a	a	b	a
IWB41820	b	a	b	b	b	b	b	b	b	b	b	b	b	b	b	b	b	b	b	b	b	b	b	b	b	b	b	b	b	b	b	b	b	b	b	b	b	b	b	b	b	b	b	b	b	b	b	b	b
IWB67648	b	b	b	b	b	b	b	b	a	a	a	a	b	b	a	b	b	b	b	b	a	b	a	a	a	b	b	a	b	a	a	a	a	a	a	b	b	a	a	a	a	b	b	b	b	b	b	b	a
IWB10957	a	b	a	b	b	b	b	b	b	b	b	a	a	b	a	b	b	b	b	b	b	a	b	b	b	a	a	b	b	a	b	a	a	a	a	a	a	b	a	b	b	a	a	a	a	b	b	a	a
IWB23590	b	a	a	b	a	a	a	a	a	a	a	b	b	a	a	a	a	a	b	a	a	a	a	a	b	a	b	a	a	b	b	a	a	a	a	a	a	a	a	a	a	a	b	a	a	a	b	a	a
IWB1520	-	b	b	b	b	b	b	b	b	b	b	b	b	b	b	b	b	b	b	b	b	b	b	b	b	b	b	b	b	b	b	b	b	b	b	b	b	b	b	b	b	b	-	a	b	b	a	b	b
IWB58695	b	b	b	b	b	b	b	b	b	b	b	b	b	b	b	b	b	b	b	b	b	b	b	b	b	b	b	b	a	b	a	b	b	b	b	b	b	b	a	b	b	a	b	a	b	b	b	b	b
IWB12415	b	b	b	a	a	a	a	a	b	a	b	b	b	b	a	a	a	a	a	b	b	b	a	a	b	a	b	b	b	b	a	b	b	b	b	b	b	b	b	b	b	b	b	b	b	b	b	b	a
IWB10434	a	a	a	a	a	a	a	a	b	a	a	a	a	a	a	a	a	a	a	a	b	a	a	a	a	a	a	a	a	a	a	a	a	a	a	a	a	a	b	a	a	a	b	a	a	b	a	a	a
IWB40456	-	a	a	a	a	a	a	a	b	a	b	b	b	b	a	a	a	a	a	a	a	a	b	b	b	a	b	a	b	a	a	b	b	b	a	a	a	a	b	b	b	a	b	b	a	a	a	a	a
IWB31982	b	b	a	b	b	b	b	a	a	b	b	b	a	b	a	b	b	b	b	b	a	a	a	a	a	a	b	b	b	b	b	a	a	a	b	b	b	b	b	b	b	b	b	b	b	a	b	b	a
IWB9114	b	b	a	a	a	b	b	b	b	b	b	a	b	b	b	a	a	a	b	b	b	b	b	a	b	a	b	b	b	a	b	a	a	a	b	b	b	b	b	b	b	b	b	b	b	b	b	a	b
IWA8385	b	b	b	b	b	a	a	a	a	a	a	a	b	b	a	a	a	a	a	b	b	b	a	a	a	b	b	b	b	a	b	b	b	b	b	b	a	b	b	b	a	a	a	a	a	a	a	a	b
IWB27660	-	b	b	b	b	b	b	b	a	b	a	a	a	a	b	b	b	b	b	b	b	b	a	a	a	b	a	b	a	b	b	a	a	a	b	b	b	b	a	a	a	b	a	a	b	b	b	b	b
IWB49736	-	a	b	a	a	a	a	a	b	a	a	a	a	a	b	a	a	a	a	a	a	a	b	a	a	a	a	a	a	a	a	b	b	b	a	a	a	a	a	a	a	a	a	b	a	a	a	a	a
IWB26800	b	b	b	b	b	b	b	b	b	b	b	b	a	b	b	b	b	b	b	a	b	b	b	b	b	b	b	b	b	b	a	a	a	a	b	b	b	b	b	b	b	b	a	b	b	b	b	a	b
IWB12994	-	a	a	a	a	a	a	a	a	a	a	a	a	a	b	a	a	a	a	a	b	b	a	a	a	b	a	a	b	a	a	a	a	a	a	a	a	b	a	a	a	a	a	a	a	a	a	b	a
IWB8831	a	b	b	b	a	b	b	b	b	b	b	b	b	b	b	a	a	a	b	b	a	b	a	a	b	a	b	b	b	b	a	b	b	b	b	a	a	b	a	a	a	a	b	a	a	a	a	b	b
IWB10578	a	b	a	a	a	a	a	b	a	a	a	b	a	a	a	a	a	a	a	-	b	b	a	a	b	a	a	-	a	a	a	b	b	b	b	a	a	a	b	b	b	b	a	b	b	b	a	a	b
IWB10331	b	a	a	a	a	a	a	b	b	a	a	a	a	a	a	b	b	b	a	b	a	b	b	a	a	b	a	a	a	b	b	a	a	a	b	a	b	b	a	a	a	b	a	a	a	a	a	a	a
IWB29898	a	a	a	a	a	a	a	b	a	b	b	a	a	b	a	a	a	a	a	a	a	a	b	a	b	a	a	a	b	a	b	a	a	a	a	a	b	a	a	a	a	a	a	a	a	a	a	a	a
IWB65946	b	b	b	b	b	b	b	b	b	b	b	b	b	a	b	b	b	b	b	a	a	b	a	b	b	a	b	a	a	b	b	a	a	a	b	b	b	a	a	a	a	a	b	a	a	a	a	b	b
IWB5646	b	a	a	a	b	b	b	a	a	b	a	b	b	b	a	b	a	a	a	a	b	b	a	b	a	a	a	b	a	b	a	a	b	b	a	a	b	a	b	a	a	b	a	b	b	b	b	a	a
IWB71899	-	b	b	b	b	b	b	a	b	b	b	b	a	b	b	b	b	b	b	a	b	b	b	b	b	b	b	b	b	b	b	b	b	b	b	b	b	b	b	b	b	b	b	b	b	b	b	b	a
IWB35578	b	b	a	b	b	a	a	b	b	a	b	a	a	a	a	b	a	a	a	b	a	b	b	b	b	a	a	a	b	a	b	a	a	a	b	b	b	b	b	b	b	b	b	b	b	b	b	b	b
IWB25409	a	a	b	b	a	a	a	b	b	b	b	a	a	b	b	b	a	a	a	b	b	b	a	b	b	b	b	a	a	b	a	b	b	b	b	b	b	b	a	a	a	a	b	b	a	b	a	b	b
IWB47168	a	a	a	b	a	b	b	a	a	b	b	a	b	a	a	b	b	b	a	b	a	a	a	a	a	a	b	a	a	a	b	a	a	a	a	a	b	a	a	a	a	b	a	a	a	a	a	a	a
IWB5822	-	b	a	a	a	a	a	b	b	a	a	b	b	b	a	b	b	b	b	a	b	b	b	a	a	b	b	a	a	a	b	b	b	b	b	a	a	b	b	b	b	b	a	b	b	a	b	a	a
IWB7317	a	b	b	b	b	b	b	b	b	b	b	b	b	b	b	b	b	b	b	b	a	b	a	b	b	b	b	b	b	b	b	b	b	b	b	b	b	b	a	a	b	a	b	a	b	a	b	b	b
IWB26072	b	a	a	b	b	b	b	b	b	b	b	b	b	b	b	b	b	b	b	a	b	a	b	b	b	b	b	b	b	a	b	b	b	b	a	b	b	a	b	b	b	b	b	a	b	b	b	b	b
IWB53113	-	a	b	b	b	b	b	b	b	b	b	b	b	b	a	b	b	b	b	b	a	b	b	b	b	a	a	b	b	a	b	b	b	b	b	a	a	a	b	b	b	b	a	b	b	b	b	b	b
IWB72476	b	b	a	b	b	b	b	a	b	a	a	b	b	a	a	b	b	b	b	a	a	b	b	b	a	b	a	b	a	b	b	b	b	b	b	b	b	-	b	b	b	b	b	b	b	b	b	b	b
IWB12652	b	b	a	a	a	a	a	a	a	a	a	b	a	a	a	a	a	a	a	a	b	b	a	a	a	b	a	b	a	b	a	a	a	a	b	b	a	a	a	a	b	a	a	a	a	b	a	a	a
IWB58806	a	a	a	-	b	b	b	a	a	a	a	b	a	a	a	b	b	b	b	a	a	a	a	a	a	b	a	b	b	a	a	b	b	b	a	b	b	a	b	a	b	a	b	b	a	b	b	b	a
IWB30208	b	a	a	a	a	a	a	a	a	a	a	a	b	b	b	a	a	a	a	a	b	a	a	a	a	b	a	a	a	a	a	a	a	a	a	a	b	a	a	a	a	a	a	a	a	a	a	a	a
IWB24136	b	a	a	a	a	a	a	a	b	a	a	a	a	b	a	a	a	a	a	a	a	a	a	b	b	a	a	a	a	a	a	a	a	a	a	a	-	a	a	a	a	a	a	a	a	a	a	a	a
IWB59491	a	a	a	a	a	a	a	a	a	a	a	a	a	a	a	a	a	a	a	a	a	a	a	a	a	a	a	a	a	a	b	a	a	a	a	a	a	a	a	a	a	a	a	a	a	b	a	a	a
IWB23111	a	a	a	a	a	a	a	b	a	a	a	b	a	a	a	a	a	a	a	a	a	b	a	a	a	a	a	a	a	a	a	a	a	a	b	a	a	b	b	a	b	a	a	a	a	a	a	a	a
IWB32927	-	a	a	b	a	b	a	b	a	b	a	a	a	b	a	b	a	a	b	a	a	a	a	a	a	b	a	a	a	a	a	-	b	b	a	a	b	a	b	b	b	b	a	b	b	a	a	a	a
IWB52625	b	b	b	a	b	a	b	b	a	a	b	b	b	b	b	b	b	b	a	b	a	b	a	a	a	a	b	b	b	b	a	b	b	b	a	b	a	a	b	b	a	b	b	b	a	b	b	b	b
IWB7195	b	b	a	b	a	b	b	a	a	b	a	a	a	b	b	b	b	b	b	a	a	a	b	b	b	b	a	a	a	b	a	b	b	b	a	a	a	a	b	a	a	b	a	b	b	a	a	a	a
IWB34029	b	b	a	b	b	a	a	b	b	b	b	b	a	b	a	b	b	b	b	a	a	b	b	b	b	b	b	a	b	a	a	b	b	b	b	b	b	b	a	a	a	a	a	a	a	a	a	b	a
IWB36266	-	b	b	b	b	b	b	b	b	b	b	a	a	b	b	b	b	b	b	b	b	a	a	a	b	a	a	b	b	a	b	b	b	b	b	b	b	b	b	b	b	b	b	b	b	b	b	b	a
IWB657	a	b	a	a	a	b	b	b	b	b	b	a	b	a	a	a	a	a	a	b	b	b	a	a	b	b	b	b	a	a	a	b	b	b	a	b	b	a	a	a	a	a	a	a	a	a	a	a	a
IWB34660	b	a	b	b	b	b	b	b	b	-	b	a	b	b	b	b	b	b	b	b	b	b	a	b	-	b	b	b	b	b	b	b	b	b	b	b	b	b	b	b	b	b	b	b	b	b	b	b	b
IWB22932	b	a	b	b	b	b	a	a	b	b	b	b	b	b	b	b	b	b	b	b	b	b	b	b	b	b	b	b	b	b	b	b	b	b	b	b	b	b	a	a	a	a	b	a	a	b	b	b	b
IWA27	a	b	b	b	b	a	a	b	b	a	b	a	b	b	a	b	b	b	b	a	a	b	b	b	b	b	a	b	b	b	b	a	a	a	a	b	b	b	a	a	a	a	a	a	a	a	a	b	b
IWB48887	a	a	a	a	a	b	b	a	b	b	b	b	b	a	a	a	a	a	b	a	a	b	b	b	a	a	b	a	a	b	a	a	a	a	b	a	b	a	a	a	a	a	a	a	a	-	a	a	b
IWB931	a	b	b	a	b	a	a	b	a	a	a	b	a	a	b	b	a	a	a	b	a	b	a	b	a	b	a	a	a	a	a	b	b	b	a	a	a	b	b	b	b	b	a	a	a	b	a	b	a
IWB23337	-	a	a	a	b	a	a	b	a	a	a	b	b	b	b	a	b	b	a	b	a	b	a	a	a	a	a	b	b	b	b	a	a	a	a	b	a	a	a	a	a	a	a	a	a	a	b	a	b
IWB34413	-	b	b	a	b	a	b	b	a	a	a	b	b	a	b	a	a	a	a	a	b	b	b	b	a	b	a	a	a	b	a	a	a	a	a	a	b	a	b	a	a	b	b	b	b	a	a	b	b
IWB35044	-	b	b	a	a	b	b	a	a	b	a	a	b	b	a	a	a	a	b	a	a	a	a	b	a	b	a	a	a	b	a	a	a	a	a	a	a	b	a	a	a	a	a	a	a	a	a	a	a
IWB12426	b	a	b	b	b	b	a	b	a	b	b	b	b	b	b	b	b	b	b	b	b	a	b	b	a	a	a	b	b	b	b	a	a	a	b	b	a	b	a	b	a	b	b	a	a	a	a	b	b
IWA3325	b	a	b	b	a	b	b	a	b	b	b	b	a	b	b	b	b	b	b	a	b	a	a	a	b	a	a	b	b	a	a	b	b	b	b	a	a	b	a	a	a	b	b	a	a	b	b	b	a
IWB42413	b	b	b	a	b	b	b	b	b	b	a	a	b	a	b	b	a	a	b	a	b	b	a	a	a	a	b	b	a	a	b	b	b	b	b	a	a	b	b	b	b	b	b	b	b	b	b	b	a
IWB6422	-	b	a	a	b	a	a	a	a	a	a	a	b	b	a	a	a	a	a	a	a	a	a	a	a	b	a	a	a	a	a	a	a	a	a	b	b	a	a	a	a	a	a	a	a	b	a	a	a
IWB63975	-	b	a	b	a	b	b	b	b	b	b	b	b	b	b	b	b	b	a	b	b	b	b	b	b	b	b	b	b	b	b	b	b	b	b	b	b	b	b	b	-	b	a	-	b	b	b	b	b
IWA2585	a	b	a	a	a	a	b	a	b	a	a	a	a	a	a	a	a	a	a	a	a	b	a	a	b	b	b	a	a	a	a	b	b	b	a	a	b	a	b	a	b	a	a	b	b	b	b	a	a
IWA2816	-	b	a	b	b	b	b	a	b	a	a	b	b	a	b	b	b	b	b	b	b	b	b	b	b	b	b	b	b	b	a	b	b	b	b	b	b	b	b	b	b	b	b	b	b	b	b	b	b
IWA4858	b	a	a	b	a	b	b	a	a	a	b	b	b	a	a	a	b	b	a	b	a	b	b	b	a	a	a	a	b	b	b	b	b	b	a	b	a	b	b	b	a	b	b	a	b	b	a	a	a
IWB36052	b	b	a	a	a	a	a	a	b	a	b	a	a	a	a	a	a	a	a	b	b	a	a	a	a	a	b	b	b	a	b	b	b	b	b	b	a	b	a	b	b	a	a	a	a	b	b	a	a
IWB25905	-	a	a	b	a	b	a	a	b	b	b	a	a	b	a	b	b	b	b	b	a	a	a	a	b	a	b	b	b	a	b	b	b	b	b	b	a	b	a	b	b	a	a	a	a	b	b	a	a
IWB60593	-	b	b	b	b	b	a	a	a	b	b	a	b	b	b	b	a	a	b	a	b	a	b	b	b	b	b	a	b	a	b	a	a	a	a	b	a	a	a	a	a	a	a	a	a	a	a	b	b
IWB4720	a	b	a	a	a	a	a	b	b	b	b	a	a	a	a	a	a	a	a	a	a	a	b	a	b	a	a	b	a	a	a	a	a	a	a	b	a	b	b	b	b	b	a	-	-	-	a	a	a
IWB12786	a	b	a	b	b	a	a	b	a	a	a	a	a	b	a	b	a	a	a	a	a	a	a	a	a	b	a	a	b	a	a	a	a	a	b	b	b	a	a	a	a	a	b	a	a	a	a	a	b
IWB64618	b	b	b	a	a	a	a	a	b	a	a	a	b	a	b	a	a	a	a	a	a	a	b	b	a	b	a	a	a	a	a	a	a	a	a	b	b	a	a	a	a	a	b	a	a	a	a	b	b
IWB9139	b	a	a	a	a	a	a	b	b	a	a	a	b	b	a	a	b	b	a	a	a	b	b	b	b	a	a	a	a	a	a	b	b	b	a	a	a	b	a	a	b	a	b	a	a	a	a	b	b
IWB30701	b	a	b	b	b	a	a	a	a	a	a	a	b	b	b	a	b	b	b	a	b	b	b	a	a	b	b	a	b	b	b	b	b	b	a	a	a	b	b	b	b	b	b	b	b	b	b	b	b
IWB7678	b	b	a	a	a	a	b	a	a	b	b	b	b	a	a	a	a	a	a	a	a	a	a	a	a	a	b	a	a	a	a	a	a	a	b	a	a	b	a	a	a	a	a	a	a	a	a	a	a
IWB38696	b	a	b	b	b	b	b	b	b	b	b	b	b	a	b	b	b	b	b	b	b	a	b	b	b	a	b	b	a	b	b	a	a	a	a	a	b	a	b	b	b	b	b	b	b	b	b	b	a
IWB8369	a	b	b	a	b	b	b	a	b	b	b	b	b	b	b	a	a	a	a	b	b	a	a	b	b	b	b	a	b	a	b	a	a	a	b	b	b	a	a	a	a	a	b	a	a	b	a	b	a
IWA300	-	b	a	a	a	a	a	a	a	a	a	a	a	a	a	a	a	a	a	b	b	a	a	a	a	b	b	b	a	a	a	a	a	a	b	b	b	a	b	b	b	a	a	b	-	a	a	a	b
IWB61149	b	b	b	a	a	a	b	a	b	b	b	b	b	a	b	a	a	a	a	a	a	a	a	a	b	b	b	a	b	b	a	b	a	a	b	b	b	b	a	b	b	b	b	a	a	b	a	b	a
IWB6012	a	a	a	a	a	a	a	b	b	a	a	a	a	a	a	a	a	a	a	a	a	a	b	b	a	b	b	a	b	a	b	a	a	a	a	b	b	a	a	a	a	a	a	a	a	a	a	b	b
IWB44183	a	b	a	a	a	b	b	a	b	b	a	a	b	a	a	a	a	a	a	a	a	b	b	b	b	b	a	a	a	a	b	a	a	a	b	a	a	b	a	a	a	a	b	a	a	a	a	a	a
IWB40845	-	b	a	a	a	a	a	a	b	a	b	b	b	b	a	a	a	a	a	a	a	b	b	b	b	b	a	a	a	a	b	a	a	a	b	a	b	b	a	a	a	b	a	a	a	a	b	a	a
IWB5713	b	b	a	a	a	a	a	b	b	a	a	b	a	a	a	b	a	a	a	a	b	b	b	b	b	b	a	b	a	a	b	a	a	a	b	b	a	b	a	a	a	b	a	a	a	a	b	a	a
IWB33064	b	a	b	b	b	b	b	a	a	a	b	b	a	b	a	b	b	b	b	b	b	a	b	b	b	b	b	a	b	b	a	a	a	a	a	a	b	b	b	a	a	a	b	-	a	b	a	a	b
IWB45473	b	b	b	b	b	b	b	b	b	b	a	b	a	b	b	b	b	b	b	a	a	a	b	b	a	b	b	a	b	b	b	b	b	b	b	b	b	a	a	a	a	a	a	a	a	a	a	b	b
IWB63883	a	a	a	a	a	b	b	b	a	a	a	a	a	a	a	a	b	b	a	a	a	a	b	b	b	a	a	a	a	a	a	a	a	a	a	a	a	b	a	a	a	a	a	a	a	a	a	a	a
IWA5552	a	b	a	a	a	a	b	a	b	b	a	b	b	b	b	a	a	a	a	b	b	b	a	a	a	b	b	a	b	b	b	b	b	b	b	a	a	b	b	b	a	b	a	b	b	b	b	b	a
IWA894	-	b	b	a	b	a	a	a	b	a	a	a	a	b	b	b	a	a	a	b	b	b	a	a	b	b	b	b	b	a	a	a	a	a	b	b	b	a	b	a	a	b	b	b	b	b	b	b	a
IWB26828	-	a	b	b	b	a	b	b	a	a	a	a	a	b	a	b	b	b	b	a	a	a	a	b	b	a	b	a	b	b	a	a	a	a	a	b	a	a	a	a	a	a	b	a	a	a	a	b	b
IWA4765	b	b	b	a	a	b	b	a	a	b	a	b	a	b	b	a	b	b	a	b	a	b	b	b	b	b	b	a	b	a	b	a	b	b	a	a	a	b	a	a	a	a	b	a	a	a	a	a	b
IWA302	a	a	b	a	b	b	b	a	a	b	b	a	a	b	b	a	b	b	b	a	b	a	a	a	b	a	a	b	a	a	a	a	a	a	a	a	a	a	a	a	a	a	a	a	a	a	a	a	a
IWB55779	-	b	b	a	a	a	a	a	a	a	a	a	a	a	a	a	a	a	a	a	b	a	b	a	a	a	a	a	a	a	a	b	b	b	b	a	b	a	a	a	a	a	a	a	a	a	a	a	b
IWB54772	a	a	a	b	a	a	a	a	a	b	a	a	a	b	a	b	b	b	b	b	b	a	a	a	a	b	a	b	b	b	a	b	b	b	a	b	a	a	a	a	a	a	a	a	a	a	a	a	b
IWB73572	b	a	b	a	a	a	a	b	a	a	b	a	b	b	a	b	a	a	b	a	a	b	a	b	b	b	a	a	b	a	b	b	b	b	a	a	b	b	a	a	a	a	a	a	a	a	a	a	b
IWB40144	b	b	b	b	a	a	a	b	b	b	a	a	b	a	b	a	b	b	a	a	b	b	b	b	a	a	a	b	a	b	b	b	b	b	b	b	b	b	b	b	b	b	a	b	b	b	b	a	b
IWA7181	b	b	a	b	b	b	b	b	a	a	a	b	b	b	a	b	b	b	b	a	a	a	a	a	a	b	b	a	b	a	b	a	a	a	b	b	b	a	a	a	a	a	b	a	a	a	a	b	b
IWA4103	b	a	b	b	b	b	b	a	b	b	b	a	b	a	b	a	b	b	b	a	b	a	a	a	b	b	a	b	a	b	a	b	b	b	a	a	b	b	b	b	b	b	b	b	b	b	b	b	b
IWB24822	a	a	a	a	a	b	b	b	b	b	b	b	b	b	a	b	a	a	b	a	b	a	b	a	b	b	a	b	b	b	a	b	b	b	a	b	a	b	b	b	b	b	a	b	b	b	b	a	b
IWB10401	a	a	b	a	b	a	a	a	a	b	b	a	a	b	b	a	b	b	a	b	b	b	a	a	a	b	a	b	a	a	b	b	b	b	b	b	b	b	b	b	b	b	a	b	b	b	b	a	a
IWB1100	a	b	b	b	b	b	b	b	b	b	b	b	b	b	b	b	b	b	b	b	b	b	b	b	b	b	b	b	b	b	b	b	b	b	b	b	b	b	a	b	b	a	b	a	b	a	b	b	b
IWB8258	a	b	b	a	a	b	b	b	b	b	b	b	b	a	a	a	a	a	a	a	b	b	b	b	a	b	b	a	a	a	b	b	b	b	b	b	a	a	b	a	a	a	a	b	a	b	b	a	b
IWB46563	-	a	b	a	a	b	b	b	a	b	b	a	a	a	b	b	a	a	a	b	a	a	a	a	b	a	b	b	a	a	a	b	b	b	a	b	b	a	b	b	b	b	b	b	b	b	b	a	b
IWB35889	-	a	a	a	a	a	a	a	b	b	a	a	b	a	a	a	a	a	a	a	a	a	a	b	b	b	b	a	a	a	a	a	a	a	a	a	a	a	a	a	a	a	a	a	a	a	a	b	a
IWB33263	a	a	a	b	b	a	a	a	a	a	a	a	a	a	a	a	b	b	b	a	a	b	b	a	a	a	b	a	a	b	b	a	a	a	a	a	a	b	a	a	a	a	a	a	a	a	a	a	b
IWB73335	b	a	b	b	b	b	b	a	a	a	b	-	a	b	b	a	b	b	b	a	a	a	a	b	b	b	b	a	b	b	a	a	a	a	a	a	a	a	b	a	b	a	a	a	a	b	b	b	a
IWB11590	a	b	b	b	b	b	b	b	b	b	b	b	b	b	a	b	b	b	b	a	b	a	a	a	b	a	b	b	b	b	a	a	b	b	a	b	b	a	a	a	a	a	a	a	a	b	a	a	b
IWB60294	b	a	a	b	b	a	a	a	a	a	a	a	a	a	a	b	a	a	b	a	a	a	a	a	a	b	a	a	a	a	a	a	a	a	a	a	a	b	b	a	a	a	a	a	a	a	a	a	a
IWB47006	b	b	b	a	a	a	a	b	b	a	a	b	a	b	b	a	b	b	a	a	b	b	b	b	b	b	b	b	b	b	b	b	b	b	b	a	a	b	b	b	b	b	b	b	b	b	a	a	a
IWB28730	-	b	a	b	b	b	b	b	b	a	a	b	b	b	a	b	b	b	b	a	a	b	b	a	b	b	a	b	b	b	a	b	b	b	b	b	b	b	a	a	a	a	b	a	a	b	b	a	b
IWB10684	a	a	a	a	a	a	a	b	a	a	a	a	a	a	a	b	b	b	b	a	a	b	a	a	b	a	a	a	a	a	a	a	a	a	a	a	a	b	a	b	a	a	a	a	a	a	a	a	a
IWB74319	-	b	a	b	b	b	b	b	b	b	b	b	b	b	a	b	b	b	b	b	b	a	a	a	a	a	b	b	b	a	a	b	b	b	b	b	a	b	b	a	b	b	a	b	b	a	a	b	b
IWB2660	-	a	a	b	a	a	a	a	b	a	a	b	b	a	a	b	a	a	a	a	a	a	a	a	a	a	b	a	a	b	a	a	a	a	a	a	a	a	a	a	a	a	a	a	a	a	a	a	a
IWA1681	b	b	b	b	b	b	b	b	b	b	a	b	a	b	b	b	b	b	b	b	b	a	b	b	b	b	b	b	b	b	b	b	b	b	a	b	b	a	b	a	a	b	b	a	b	b	b	b	b
IWB34321	a	a	a	a	a	b	b	a	a	a	a	b	b	a	b	a	a	a	a	b	b	a	b	b	a	a	a	a	a	b	b	a	a	a	a	a	a	a	a	a	a	a	b	a	a	b	a	a	b
IWB72197	a	a	a	a	a	a	a	a	a	a	a	a	a	a	a	a	a	a	a	a	b	a	a	a	a	a	a	a	a	a	a	b	a	a	a	a	a	a	a	a	a	a	a	a	a	a	a	a	a
IWB35645	b	a	b	a	a	b	b	b	b	b	a	b	b	b	b	b	b	b	b	b	b	b	b	b	b	a	b	a	a	b	a	b	b	b	a	a	b	a	a	a	a	a	b	a	a	a	a	b	b
IWB1645	b	b	b	b	b	a	a	b	a	a	b	b	a	a	a	b	b	b	b	a	b	a	a	a	a	b	a	b	b	a	a	a	a	a	b	a	a	a	b	b	b	b	a	b	b	a	b	a	a
IWB45981	b	b	a	a	b	a	a	b	a	b	b	b	a	a	a	a	b	b	b	b	a	b	b	b	a	b	b	b	a	a	b	b	b	b	b	b	b	a	a	a	a	a	a	a	a	b	a	a	b
IWB34580	a	b	b	b	b	b	b	b	a	b	b	b	b	b	b	b	b	b	b	a	a	b	b	b	b	b	b	a	b	b	b	b	b	b	b	b	a	b	b	a	a	a	b	a	a	a	a	b	a
IWB48999	a	b	a	b	a	b	b	a	a	a	b	a	b	b	a	a	b	b	a	a	a	a	b	b	b	b	a	a	b	b	a	a	a	a	b	a	a	b	a	a	a	a	b	a	a	a	a	a	a
IWB46957	b	a	b	a	a	b	b	a	a	a	a	a	a	a	b	a	a	a	a	b	a	a	a	a	a	a	a	b	b	a	a	a	a	a	a	b	a	a	a	a	a	a	a	b	a	a	a	a	a
IWA7689	b	a	b	a	a	a	a	a	a	a	a	a	a	b	b	a	a	a	a	a	b	a	a	b	b	a	a	b	b	a	a	a	a	a	a	a	a	a	b	a	a	a	a	a	a	a	b	b	a
IWA3202	a	a	b	a	a	a	a	a	a	a	a	b	a	b	b	a	a	a	a	a	b	a	a	a	a	a	a	a	b	a	a	a	a	a	a	a	a	a	b	b	b	b	b	b	b	a	b	a	a
IWB43115	a	b	a	b	b	b	b	a	a	b	a	b	b	a	a	b	b	b	b	a	a	b	b	b	a	b	b	a	a	a	a	a	a	a	b	b	b	b	b	b	b	a	b	a	a	b	a	a	b
IWB60590	-	a	a	a	b	a	a	a	a	a	a	b	b	b	a	a	a	a	b	a	a	a	a	a	b	a	a	b	b	b	b	a	a	a	a	a	b	a	a	a	a	a	a	a	a	b	a	a	b
IWB52845	a	-	a	b	a	b	b	a	a	a	b	a	a	a	a	a	b	b	a	a	a	a	a	a	b	a	a	a	b	b	a	a	a	a	b	a	a	-	a	a	a	a	a	a	a	a	a	a	a
IWB40242	b	b	b	b	b	b	b	a	-	b	b	b	b	b	a	b	b	b	b	b	b	b	b	b	b	b	b	b	b	a	a	a	a	a	a	a	a	b	b	b	b	a	a	b	b	b	b	b	a
IWB21680	a	a	a	b	b	a	a	b	b	a	b	a	a	b	a	b	a	a	b	b	b	a	a	a	b	a	a	b	a	a	a	b	b	b	a	a	b	a	b	b	b	b	a	b	b	b	b	b	b
IWB55930	b	a	a	b	b	a	a	b	a	b	b	a	b	a	a	b	b	b	b	a	b	a	a	a	a	a	a	a	a	a	b	a	a	a	a	b	a	a	a	a	a	a	a	a	a	a	a	a	a
IWB24450	a	a	a	a	a	a	a	a	a	a	a	a	a	a	a	a	a	a	a	a	a	a	b	a	a	a	a	a	a	a	a	a	a	a	a	a	b	a	a	a	a	a	a	b	a	a	a	a	a
IWB50000	b	a	a	a	a	a	a	a	a	a	a	a	a	a	a	a	a	a	a	a	a	a	a	a	a	a	a	a	b	a	a	a	a	a	a	a	a	a	a	a	a	a	a	a	a	a	a	a	a
IWB68130	a	b	a	b	b	b	b	b	b	b	b	b	b	a	b	b	b	b	b	b	a	b	b	a	b	b	b	a	a	b	b	b	b	b	b	b	b	b	a	b	b	b	b	b	b	b	a	b	b
IWB60699	a	b	b	b	b	b	b	b	b	b	b	b	b	b	b	b	b	b	b	a	a	b	b	b	b	b	a	a	b	b	b	a	a	a	b	b	b	b	a	a	b	a	b	-	a	a	b	a	b
IWB47213	a	b	b	b	b	b	b	a	b	b	a	b	b	b	a	b	b	b	b	a	b	b	b	b	a	b	b	a	a	a	a	a	a	a	b	b	b	b	b	a	b	a	b	b	b	b	b	a	b
IWB27650	b	a	a	b	b	b	b	a	a	b	b	b	a	a	a	b	b	b	b	b	a	b	a	a	a	a	a	a	a	a	a	b	b	b	b	a	a	a	a	a	a	a	a	a	a	a	a	b	b
IWB25254	-	a	a	a	a	a	a	a	a	a	a	a	b	b	a	a	a	a	a	a	a	b	b	a	a	a	a	a	b	a	b	b	b	b	a	a	a	a	a	a	a	a	a	a	a	a	a	a	a
IWB553	b	b	a	b	b	b	b	b	b	a	a	a	a	a	a	b	b	b	b	a	a	a	b	a	a	b	a	a	a	b	a	a	b	b	b	b	b	a	a	a	a	a	a	a	a	b	b	b	b
IWA8129	-	a	b	a	a	a	a	a	b	a	a	a	a	a	a	a	a	a	a	a	a	a	a	a	a	a	a	a	a	a	a	b	b	b	a	a	a	a	a	a	a	a	a	a	a	a	a	a	a
IWB69845	-	a	a	a	b	a	a	a	a	a	a	a	a	b	a	a	a	a	b	a	a	a	a	a	a	a	a	a	b	a	a	a	b	b	a	a	a	a	b	a	b	a	a	b	b	a	b	a	a
IWB58450	b	b	a	b	b	b	b	b	a	b	b	a	a	a	a	b	b	b	b	a	a	b	b	a	a	b	b	a	b	a	a	a	a	a	b	b	b	b	a	b	b	a	b	b	b	b	b	a	b
IWB47293	b	b	b	b	b	a	a	a	b	b	a	a	a	a	a	b	b	b	b	b	b	b	b	a	a	b	b	b	a	a	a	a	a	a	b	b	b	b	b	b	b	a	a	a	a	a	b	a	b
IWB62933	-	a	a	b	b	b	b	a	b	-	a	b	a	b	-	b	b	b	b	b	b	a	b	b	b	b	b	a	b	a	b	b	b	b	b	b	a	a	b	b	b	b	b	a	a	a	b	b	b
IWB28186	a	a	a	a	a	a	a	a	a	a	a	a	b	a	a	a	a	a	a	a	a	b	a	a	a	a	a	b	b	b	a	b	b	b	a	a	a	b	a	a	a	b	a	b	b	a	a	a	a
IWB60897	a	b	b	b	b	b	b	b	b	b	b	b	b	b	b	b	b	b	b	b	b	b	b	b	b	b	b	b	b	b	b	b	b	b	b	b	a	b	b	b	b	b	b	b	b	b	a	b	b
IWB5623	-	a	a	a	a	a	a	a	a	a	a	a	a	a	a	a	a	a	a	a	a	a	a	a	a	a	a	a	a	a	a	a	a	a	a	a	a	a	a	a	a	a	a	a	a	a	a	a	a
IWB17506	b	a	a	a	a	a	a	b	a	b	a	a	a	a	a	a	a	a	a	a	a	a	a	a	b	a	a	a	a	a	a	a	a	a	b	a	a	a	b	b	a	a	a	a	b	b	b	a	a
IWA3694	a	b	b	b	b	b	b	b	b	b	b	a	b	a	a	a	b	b	b	a	a	b	b	b	b	b	a	a	a	b	b	b	b	b	b	b	b	a	a	a	a	a	a	a	a	a	a	b	b
IWB27012	b	b	b	a	b	b	b	b	a	a	a	b	a	a	a	b	b	b	b	a	a	b	b	a	a	a	a	b	b	a	b	a	a	a	a	a	a	a	b	b	b	b	b	a	a	a	a	a	b
IWB46046	a	b	b	a	b	b	b	b	b	b	b	a	a	b	b	b	b	b	b	a	a	b	a	b	a	b	b	a	a	b	b	a	a	a	b	a	b	b	b	b	-	b	b	b	b	b	a	b	a
IWB1318	b	a	a	a	a	a	a	a	a	a	a	b	a	b	b	b	a	a	a	b	b	a	a	a	a	a	a	b	b	a	a	b	b	b	a	a	a	b	b	-	b	b	b	b	b	b	b	a	a
IWB59446	b	b	b	b	b	b	b	b	a	b	b	b	b	b	b	b	b	b	b	b	b	b	b	a	a	b	b	b	b	b	b	a	a	a	a	b	b	a	b	a	a	a	b	b	a	b	b	b	b
IWB10705	a	b	b	b	b	b	b	b	b	b	b	b	a	b	b	b	b	b	b	b	a	b	a	b	a	b	b	b	b	a	b	b	b	b	b	b	b	a	a	a	a	a	b	a	a	b	a	b	b
IWB8268	-	b	b	b	b	b	b	b	b	b	b	b	b	b	b	b	b	b	b	b	b	b	b	b	b	b	b	a	b	b	b	a	a	a	b	b	b	a	a	b	b	a	b	b	b	b	a	b	b
IWB25561	a	b	a	a	a	a	a	a	a	a	a	a	a	a	a	a	a	a	a	a	a	a	a	b	b	a	a	b	a	a	a	b	b	b	a	a	a	a	b	b	b	b	b	b	b	a	a	a	a
IWB60403	-	a	a	b	b	b	b	b	b	b	b	b	b	a	a	b	b	b	b	b	b	a	b	b	b	a	a	b	a	a	b	b	b	b	b	a	a	b	a	a	a	b	b	a	a	a	b	a	b
IWB71703	b	b	b	a	a	a	a	a	a	a	a	-	a	b	b	a	a	a	a	a	a	b	b	a	a	a	a	a	b	a	a	b	b	b	a	a	a	a	a	a	a	a	b	a	a	a	a	b	b
IWB7554	b	b	b	b	b	b	b	a	b	b	a	b	b	b	b	b	b	b	b	b	b	a	a	b	a	b	a	a	b	b	b	b	b	b	a	a	a	a	b	b	b	b	b	b	b	b	b	b	a
IWB59887	a	a	b	a	a	a	a	a	b	a	a	b	b	b	b	a	a	a	a	b	b	b	b	b	b	a	b	b	b	a	b	b	b	b	a	a	a	b	b	b	-	b	b	b	b	b	b	b	a
IWB41262	b	a	a	b	a	a	a	a	b	b	b	b	b	a	a	a	a	a	a	b	b	b	b	b	b	a	b	b	a	b	b	b	b	b	b	b	b	a	b	b	b	b	a	b	b	b	a	b	b
IWA7731	b	a	b	b	b	b	b	b	a	b	b	b	b	a	a	b	b	b	b	a	a	a	b	b	a	a	b	a	a	b	a	b	b	b	b	b	b	b	b	b	b	a	a	a	a	a	b	b	a
IWA2894	b	a	b	b	b	b	b	b	b	b	b	b	b	a	b	b	b	b	b	b	b	a	b	a	b	b	b	b	a	a	b	a	a	a	a	a	a	a	a	a	b	a	b	a	a	b	a	b	a
IWB64830	b	b	b	b	b	b	b	b	a	b	b	b	b	b	b	b	b	b	b	a	a	b	b	a	b	b	b	a	b	b	b	a	b	b	b	b	b	a	a	b	b	b	b	b	-	b	a	b	b
IWB42012	-	a	b	a	a	b	b	a	a	a	a	a	a	a	b	a	a	a	a	b	b	a	a	a	a	a	a	a	a	a	b	a	a	b	a	a	a	a	b	b	b	b	b	b	a	b	b	a	b
IWB26709	-	b	a	a	a	a	a	b	a	a	a	b	b	a	a	a	a	a	a	b	a	a	a	b	a	a	a	a	a	b	a	a	a	a	a	b	a	b	a	a	b	b	a	b	a	a	b	a	b
IWB22760	-	a	a	b	b	b	b	b	a	a	a	a	a	a	a	b	b	b	b	b	a	a	a	a	a	a	a	a	a	a	a	b	b	b	a	b	a	a	a	a	a	b	a	a	a	a	a	a	a
IWB9009	a	b	a	b	b	b	b	b	a	b	b	a	b	b	b	b	b	b	b	b	b	b	b	b	b	b	a	b	b	b	b	a	a	a	b	b	b	b	b	b	b	b	b	b	b	b	b	b	b
IWB62855	b	a	a	b	b	b	b	b	a	b	a	b	b	a	a	b	a	a	b	b	b	b	b	b	b	b	a	a	a	b	b	b	b	b	a	b	a	b	b	b	b	b	b	b	b	b	b	a	b
IWB44621	b	a	a	b	b	b	b	b	b	a	b	b	b	a	a	b	b	b	b	b	b	b	b	a	a	b	a	b	b	b	b	b	b	b	a	b	a	b	b	b	b	b	b	b	b	b	b	a	b
IWA7884	a	b	b	a	a	a	a	b	b	a	a	b	a	b	a	a	a	a	a	a	a	b	b	b	b	b	a	b	b	b	a	a	a	a	a	b	a	a	b	a	a	a	a	b	b	b	b	a	a
IWB50373	a	a	a	a	a	a	a	a	b	b	a	a	b	a	a	a	a	a	a	b	a	a	a	a	a	b	a	b	a	a	b	a	a	a	a	b	b	a	a	a	a	b	a	a	a	a	a	a	a
IWB72833	b	b	b	b	a	b	b	b	b	a	b	b	b	a	b	b	a	a	a	b	b	b	b	b	b	b	b	b	a	a	a	a	-	-	b	b	b	b	b	b	b	b	b	b	b	b	b	a	b
IWA7554	a	b	b	b	b	b	b	b	b	b	b	a	b	a	a	a	b	b	b	b	b	b	b	b	b	b	b	b	a	b	b	a	a	a	b	b	b	b	b	b	b	b	b	b	b	b	b	b	b
IWB704	b	b	b	a	a	a	a	b	a	b	b	b	b	a	b	a	a	a	a	b	b	b	b	b	b	a	b	b	a	a	b	b	b	b	b	a	a	b	b	b	b	b	a	b	b	a	b	a	b
IWA4832	b	a	a	b	b	a	a	a	a	a	a	a	b	a	b	a	b	b	b	a	a	b	b	a	a	b	a	a	a	b	b	b	b	b	a	a	a	b	a	a	a	a	a	a	a	a	a	b	b
IWB60043	b	a	a	b	b	b	b	a	a	a	b	a	b	b	b	a	a	a	b	b	b	b	b	a	a	a	a	a	b	a	b	a	a	a	a	b	a	a	a	a	a	a	a	a	a	b	a	b	b
IWB20242	a	b	b	b	b	b	b	b	b	b	b	b	b	b	b	b	b	b	b	b	a	b	b	b	b	b	b	b	b	b	b	b	b	b	b	b	b	b	b	b	b	b	b	b	b	b	a	b	b
IWB43965	-	b	b	a	a	a	a	a	b	b	b	b	b	b	b	a	a	a	a	a	b	b	a	a	a	b	b	a	b	b	b	a	a	a	b	b	b	b	b	b	b	b	b	b	b	b	b	b	b
IWA4438	b	b	a	a	a	a	a	a	a	a	a	a	a	b	a	-	b	b	b	a	-	a	-	a	a	a	a	b	a	a	a	a	a	a	a	a	a	a	a	a	a	a	a	a	a	a	a	a	a
IWB74161	b	a	a	a	b	b	b	b	a	b	b	a	a	b	b	b	b	b	b	b	b	a	a	a	a	a	a	a	b	b	a	a	a	a	a	a	a	a	a	a	a	a	a	a	-	a	a	a	a
IWA1247	a	-	b	b	b	b	b	b	a	b	b	b	b	b	b	b	b	b	b	a	b	b	b	b	b	b	b	a	b	b	b	b	b	b	b	a	a	b	b	b	a	b	b	-	b	b	a	b	b
IWB49520	b	a	a	a	a	a	a	a	a	a	a	a	a	a	a	a	a	a	a	a	a	a	a	a	a	a	a	a	a	a	b	a	a	a	a	a	a	a	a	a	a	a	a	b	a	-	b	a	a
IWB31924	b	a	a	a	a	b	b	a	a	b	a	b	a	a	a	a	a	a	a	b	b	a	a	a	a	a	a	b	a	b	a	a	a	a	a	a	a	a	b	b	b	b	b	b	b	b	b	a	a
IWB38554	a	b	a	a	a	a	a	a	b	a	a	a	b	a	a	a	a	a	a	b	a	a	a	a	-	b	a	a	a	-	a	a	a	a	a	b	b	a	a	a	a	b	a	a	a	a	a	b	b
IWB36887	a	b	a	a	a	a	a	a	a	a	a	b	a	a	a	a	a	a	a	a	b	b	a	b	-	b	a	a	a	-	b	a	a	a	a	a	a	a	a	b	b	b	a	a	b	a	a	a	a
IWA8026	a	b	a	a	a	a	a	a	b	a	b	a	b	a	a	a	a	a	a	b	a	b	a	b	b	a	a	b	a	b	a	a	a	a	b	a	b	b	a	a	a	a	a	a	a	a	a	a	a
IWB25041	b	a	b	b	b	a	a	b	b	a	b	a	a	a	b	b	b	b	a	a	a	b	b	b	b	b	a	b	b	b	a	a	a	a	b	a	a	b	a	b	b	b	b	a	a	b	a	a	a
IWB71352	a	b	b	b	b	b	b	b	a	b	b	b	b	b	a	b	b	b	b	b	b	a	b	b	b	b	b	a	b	b	b	b	b	b	a	b	b	b	b	b	b	a	b	b	b	b	b	b	b
IWB70039	b	b	b	b	b	b	b	b	a	b	b	b	b	b	b	b	b	b	b	b	a	a	b	b	b	b	b	a	a	b	b	b	b	b	a	b	b	b	a	a	a	a	a	a	a	a	a	b	b
IWA6152	-	a	b	b	b	b	b	b	b	a	a	b	a	b	a	b	b	b	b	b	b	b	b	b	b	b	b	a	b	b	a	a	b	b	a	b	b	a	a	a	a	a	b	a	b	a	a	b	b
IWA6144	b	a	b	b	b	b	b	a	a	a	a	b	b	b	b	b	b	b	b	b	a	a	a	a	b	a	a	a	b	a	b	a	a	a	a	a	a	b	a	a	a	a	b	a	a	a	a	a	a
IWA6729	a	a	b	a	a	a	a	b	b	b	b	a	a	a	a	a	a	a	a	a	a	b	b	a	a	b	a	a	a	a	b	a	a	a	b	a	b	a	a	a	a	a	a	a	a	a	a	a	b
IWB29580	a	b	b	b	b	b	b	b	b	a	a	a	a	a	a	b	b	b	b	b	a	b	b	b	a	b	b	a	b	a	a	b	b	b	a	a	b	a	a	a	a	a	b	a	a	a	a	b	a
IWB37296	b	a	b	b	b	b	b	b	a	b	b	b	a	b	a	b	b	b	b	b	b	b	b	b	b	a	b	b	b	a	b	a	a	a	a	b	b	a	a	b	b	a	b	b	b	b	a	b	b
IWA3684	-	b	b	a	a	b	b	a	a	b	a	a	b	a	a	a	a	a	b	b	a	a	a	a	b	a	b	a	b	b	b	a	a	a	a	b	b	b	b	a	a	a	a	a	b	a	b	b	b
IWA7017	b	a	b	b	b	b	b	b	b	b	b	a	b	a	b	b	b	b	b	b	b	a	b	a	b	a	b	b	a	b	b	b	b	b	b	b	b	b	b	a	a	a	a	a	b	a	b	b	a
IWB24029	a	b	-	a	a	b	a	b	b	b	a	b	b	b	a	a	b	a	a	a	a	b	b	b	b	a	b	a	b	b	b	b	b	a	a	a	a	-	a	a	-	a	a	-	a	a	a	b	-
IWA57	-	a	a	b	b	b	b	a	a	a	a	b	b	b	b	b	b	b	b	b	b	a	a	b	b	b	b	a	b	a	a	b	b	b	a	b	a	a	b	b	b	a	b	a	b	a	a	b	a
IWB71743	a	b	a	a	a	a	a	a	a	a	a	b	b	b	a	a	a	a	a	a	b	b	a	a	b	a	a	b	b	a	b	a	a	a	a	b	a	b	b	b	b	b	b	b	b	-	-	a	b
IWA4538	b	a	a	b	b	b	b	a	a	b	b	a	a	b	a	b	b	b	b	b	a	b	a	a	b	a	b	a	b	a	b	b	b	b	a	a	a	a	a	a	a	b	b	a	a	a	a	b	a
IWB6777	-	a	a	b	a	b	b	a	b	a	b	b	b	a	a	a	b	b	b	a	b	a	a	a	b	a	a	b	a	b	b	a	a	a	a	b	a	a	a	a	a	b	a	b	a	b	b	a	a
IWB24130	b	b	a	b	b	b	b	b	b	b	b	b	b	b	a	b	b	b	b	b	b	b	a	b	b	b	b	b	a	b	a	b	b	b	b	b	b	b	b	b	b	b	b	b	b	b	b	b	a
IWB41964	-	b	a	b	b	b	b	a	b	a	a	a	a	a	a	a	b	b	b	a	b	a	b	a	b	a	a	b	a	-	a	b	b	b	a	a	a	a	b	a	a	b	a	a	a	a	b	a	a
IWB22503	b	a	a	a	a	a	a	b	b	b	b	b	a	b	b	a	a	a	a	a	b	a	a	a	b	b	b	b	b	b	a	a	a	a	a	a	b	a	a	a	a	a	a	a	a	b	a	a	a
IWB65512	a	b	b	b	b	b	b	b	a	b	b	b	b	a	b	b	b	b	b	b	b	b	b	b	a	b	b	b	b	a	b	b	b	b	b	a	b	b	b	b	b	b	b	b	b	b	b	b	a
IWB41400	b	a	b	b	b	b	b	b	b	b	b	b	b	b	b	b	a	a	a	a	b	b	b	a	a	b	b	b	b	b	b	b	b	b	b	b	b	b	b	a	b	b	a	b	a	b	b	b	a
IWB72645	b	b	b	b	b	b	b	b	b	b	b	b	b	b	b	b	b	b	b	b	b	b	b	b	b	b	b	a	b	b	b	b	b	b	b	b	b	b	b	b	b	b	b	b	b	b	b	b	b
IWB29900	b	b	b	a	a	b	b	a	b	a	a	b	a	a	b	a	a	a	a	a	b	b	b	a	-	a	a	a	b	-	b	b	b	b	b	a	a	b	a	b	a	b	b	b	a	a	a	a	a
IWB15987	b	b	b	b	b	b	b	b	b	b	b	b	b	a	b	b	b	b	b	a	a	a	b	b	a	b	b	a	b	b	b	b	b	b	a	b	b	a	a	a	a	a	b	a	a	a	a	b	b
IWB14037	a	b	b	b	b	b	b	b	b	b	b	b	b	b	b	b	b	b	b	b	b	b	b	b	b	b	b	b	b	b	b	b	b	b	b	b	b	b	b	b	b	b	b	b	b	b	b	b	b
IWA5145	b	a	b	b	b	b	b	a	b	-	b	b	b	b	b	b	b	b	b	b	b	a	b	b	a	a	b	a	b	b	b	b	b	b	a	a	b	a	b	b	b	b	b	b	b	b	b	b	b
IWB35200	-	a	a	b	a	b	b	a	a	a	b	b	b	a	a	b	b	b	b	a	a	a	a	b	a	a	b	a	a	b	b	b	a	a	b	a	b	a	b	b	b	b	a	b	b	b	b	-	a
IWA4323	b	a	b	a	b	b	b	a	b	b	a	b	b	b	a	a	a	a	b	b	b	a	b	b	a	a	b	b	a	b	b	b	b	b	b	b	b	a	b	b	b	b	a	b	b	a	a	b	b
IWB64285	-	a	a	a	a	a	a	a	a	a	a	a	b	a	a	a	a	a	a	b	b	b	b	a	a	b	b	b	a	a	b	a	a	a	a	a	b	b	a	a	b	a	a	b	a	b	b	b	b
IWA5525	-	a	b	a	a	b	b	a	b	a	a	a	a	b	b	a	a	a	a	b	b	b	b	b	b	b	b	a	b	a	b	a	a	a	a	b	a	b	a	a	a	a	b	a	a	b	a	b	b
IWB59333	b	b	b	a	a	b	b	b	b	b	b	a	b	b	a	b	b	b	b	b	b	b	b	b	b	b	b	b	a	b	a	b	a	a	b	a	a	b	a	a	a	a	a	b	a	b	b	a	a
IWB46550	b	b	b	b	b	b	b	b	b	b	b	b	b	b	b	b	b	b	b	b	b	b	b	b	b	b	b	b	b	b	a	b	b	b	a	b	b	b	b	b	b	b	b	b	b	b	b	b	b
IWB8430	a	a	a	a	a	a	a	a	b	a	a	a	a	a	a	a	a	a	a	a	a	a	a	b	b	a	b	a	a	a	a	a	a	a	a	a	a	a	a	a	a	a	a	a	a	a	a	a	a
IWB73038	a	a	a	a	a	a	a	a	a	b	a	a	b	b	a	a	b	b	a	b	b	a	b	b	a	b	a	b	a	a	a	a	a	a	b	b	b	b	b	b	b	b	b	b	b	b	b	b	b
IWA5811	a	a	b	a	a	a	a	a	a	a	a	b	b	a	b	a	a	a	a	b	b	b	a	b	b	a	b	a	a	b	a	b	b	b	a	b	a	b	a	a	a	a	a	a	a	a	a	b	a
IWB41405	-	a	b	a	b	a	a	a	b	a	a	b	b	b	b	a	a	a	a	b	b	a	a	a	a	a	a	b	b	b	b	b	b	b	a	a	a	b	b	b	b	b	b	b	b	b	b	b	b
IWB41389	a	b	a	b	b	b	b	a	a	b	b	b	a	b	a	b	b	b	b	a	a	b	b	b	b	a	b	-	b	b	a	b	b	b	b	a	a	b	a	a	a	b	a	a	a	a	a	a	a
IWB65727	b	b	b	b	b	b	b	b	b	b	b	b	a	b	a	b	b	b	b	a	b	b	b	b	b	b	a	b	a	b	b	b	b	b	b	a	b	b	b	b	b	b	b	b	b	b	b	a	a
IWA4216	-	b	a	a	a	a	a	a	b	a	a	b	a	a	a	a	a	a	a	a	a	a	a	b	b	a	a	b	a	a	b	b	b	b	a	a	a	b	b	b	b	b	a	b	b	b	a	b	b
IWB9583	-	b	b	b	b	b	b	b	b	a	a	b	b	b	b	b	b	b	b	b	b	b	a	a	a	b	b	b	b	a	a	a	a	a	b	b	b	b	b	b	b	b	b	b	b	b	b	b	a
IWB46283	a	a	b	b	b	b	b	b	b	a	a	b	a	b	b	b	b	b	b	b	b	a	b	b	b	b	b	b	b	b	a	b	b	b	a	a	a	b	b	b	b	b	b	b	b	b	b	b	b
IWB62754	a	a	b	b	b	b	b	-	b	b	b	b	a	b	b	b	b	b	b	b	a	a	b	b	a	a	b	a	b	a	a	b	b	b	a	b	b	a	b	a	a	a	b	a	a	a	a	b	b
IWB32593	a	a	b	a	a	a	a	b	a	a	a	a	a	a	b	a	a	a	a	a	a	a	a	a	a	a	a	a	a	a	b	a	a	a	a	a	a	b	b	b	b	a	b	b	b	b	b	b	a
IWB71778	b	b	a	b	b	a	a	b	a	a	b	a	b	b	b	b	a	a	b	b	b	b	b	a	b	b	b	b	b	b	a	a	a	a	a	b	b	b	b	b	b	b	a	b	b	b	b	a	b
IWB49647	b	a	b	a	a	a	a	b	a	a	a	b	b	b	a	a	a	a	a	a	a	a	a	a	a	b	a	a	a	b	b	b	b	b	a	b	a	b	a	a	a	a	a	a	a	a	a	a	a
IWA5093	a	b	a	b	a	a	a	a	a	a	b	a	a	a	b	a	a	a	b	a	b	a	a	a	a	a	a	a	a	b	b	b	b	b	b	a	a	a	a	a	a	b	b	b	b	a	a	a	a
IWB23479	a	a	a	a	a	b	b	a	b	b	b	b	a	a	a	a	a	a	a	a	b	a	b	b	a	a	b	a	a	a	b	b	b	b	a	b	a	a	b	b	b	a	b	b	b	b	a	a	a
IWB13459	a	b	b	a	a	a	a	a	a	a	a	a	a	a	a	a	a	a	a	b	a	a	a	b	b	a	a	a	a	a	a	a	a	a	b	a	a	a	a	a	a	a	a	a	b	a	a	b	a
IWB72299	-	b	b	b	b	b	b	a	a	b	b	b	a	b	b	b	b	b	b	a	a	a	b	b	b	a	b	a	b	b	a	b	b	b	b	a	a	a	b	b	b	b	b	a	b	a	b	a	b
IWB43883	a	a	b	a	a	a	a	b	-	b	b	b	b	b	b	a	a	a	b	b	a	a	a	a	b	a	b	a	b	-	b	b	b	b	b	b	a	b	b	b	b	b	b	b	b	b	b	b	b
IWB29704	a	a	b	a	a	a	a	a	a	a	a	a	b	a	b	a	b	b	b	a	a	a	a	a	a	a	a	b	a	b	a	a	a	a	a	a	a	a	b	a	a	a	b	b	b	b	a	a	a
IWB60052	-	a	b	b	b	b	a	a	b	b	b	b	b	a	b	b	b	b	b	b	b	b	b	b	b	b	b	b	b	a	b	b	a	a	b	b	b	b	a	a	a	a	b	a	a	b	b	b	b
IWB72693	b	a	a	a	a	a	a	a	a	a	a	a	b	a	a	a	a	a	a	a	a	a	a	a	a	a	a	a	a	a	a	a	a	a	a	a	a	a	a	a	a	a	a	a	a	a	a	a	b
IWB13162	b	a	b	a	a	b	b	-	b	a	b	a	a	b	b	a	a	a	b	a	a	a	a	a	a	a	b	a	a	-	b	a	a	a	a	-	b	a	a	a	b	a	b	a	a	a	a	a	a
IWB65390	a	b	b	b	a	b	b	a	b	b	b	b	b	b	b	a	b	b	b	b	a	b	a	b	b	b	a	a	a	b	b	b	b	b	b	a	b	b	b	b	b	b	b	b	b	b	b	b	b
IWB60252	a	b	b	b	b	b	b	a	b	b	b	b	a	b	a	b	b	b	b	b	b	b	b	b	b	a	b	b	b	b	b	a	a	a	b	b	b	b	b	b	b	b	b	b	b	b	-	a	b
IWB9708	a	a	b	a	a	a	a	a	a	a	a	a	a	a	b	a	a	a	a	b	b	a	a	a	b	a	a	b	b	a	a	a	a	a	a	b	a	a	b	a	b	b	a	b	b	b	b	a	a
IWB60531	a	a	b	b	b	a	a	b	b	a	a	a	a	b	a	b	b	b	b	a	b	a	b	b	b	a	b	a	a	b	a	a	a	a	a	b	b	a	a	a	a	a	a	b	a	a	a	a	a
IWB66513	a	a	b	a	a	b	b	b	b	a	a	b	b	b	b	a	a	a	a	a	a	b	a	b	b	b	b	a	b	b	a	a	a	a	a	a	a	b	a	a	a	a	b	a	a	a	a	a	a
IWB65939	-	b	b	b	b	b	b	b	b	b	b	b	b	b	b	b	b	b	b	a	b	b	b	b	b	b	b	a	b	b	b	b	b	b	b	b	b	b	b	a	b	a	b	a	a	a	a	b	b
IWB63461	a	a	b	b	a	a	a	a	b	a	a	a	b	a	b	a	b	b	a	a	a	a	a	-	b	a	b	a	a	b	a	a	a	a	a	a	b	a	a	a	a	a	b	a	a	a	a	a	a
IWB31790	a	b	b	b	b	b	b	b	b	a	b	a	a	a	b	b	b	b	b	b	a	b	b	a	b	b	a	a	b	a	b	b	b	b	b	b	a	b	a	b	b	a	b	a	a	a	a	b	b
IWB60083	-	b	a	a	a	a	a	b	b	a	a	a	a	a	a	a	a	a	a	a	a	b	a	b	a	a	b	b	b	a	a	b	a	a	b	b	a	b	b	b	b	b	a	a	a	a	b	b	a
IWB64939	b	-	a	a	a	a	a	a	a	a	a	a	b	a	a	a	a	a	a	b	a	a	a	a	a	a	a	a	a	a	a	a	a	a	a	a	a	a	a	b	b	b	a	b	a	b	a	a	a
IWA4497	b	a	b	a	b	a	a	a	a	a	a	b	a	b	b	a	b	b	b	a	b	a	a	b	a	b	a	b	b	b	a	a	a	a	a	b	a	b	b	b	b	b	b	b	b	b	a	a	b
IWB8884	a	b	b	b	a	b	b	a	b	b	a	b	a	b	b	a	a	a	b	b	b	b	b	-	b	b	b	a	b	b	b	b	b	b	b	b	a	b	b	b	b	b	b	b	b	b	b	b	b
IWB10783	b	b	a	b	b	b	b	b	a	b	b	a	b	a	a	b	b	b	b	b	b	b	b	b	b	b	a	b	a	b	b	b	b	b	b	b	b	b	b	b	b	b	b	b	b	b	b	b	b
IWA4630	-	b	a	b	b	a	a	b	b	-	b	b	b	a	a	b	b	b	b	a	a	b	a	a	a	b	a	a	a	b	a	b	b	b	a	a	a	b	a	a	a	a	b	a	a	a	a	b	b
IWB8115	b	a	b	a	a	a	a	a	a	a	b	b	b	b	b	a	a	a	a	a	a	a	b	a	b	a	a	b	a	b	b	a	b	b	a	a	b	a	a	a	a	a	b	b	b	b	a	a	a
IWB9189	-	b	a	b	b	b	b	b	b	b	b	b	a	a	b	b	b	b	b	-	b	b	b	b	b	b	b	b	b	a	b	b	b	b	b	b	a	b	b	b	b	b	b	b	b	b	b	a	b
IWB7702	b	a	b	a	b	a	a	b	b	b	a	b	a	a	b	b	a	a	b	b	b	b	a	a	a	a	b	b	a	a	b	b	b	b	a	a	b	a	b	b	b	a	a	a	a	a	b	b	b
IWB74609	a	b	b	b	b	b	b	b	a	b	b	b	b	b	b	b	b	b	b	b	b	b	b	b	b	b	b	b	b	b	b	a	a	a	b	b	b	b	b	b	b	b	b	b	b	b	b	b	b
IWB2611	a	a	a	b	b	a	a	a	a	a	b	a	a	a	a	a	a	a	a	b	a	a	a	a	a	a	a	b	a	b	a	a	a	a	a	b	a	a	b	a	a	a	a	a	a	a	a	a	a
IWB59242	a	b	b	b	b	b	b	b	b	b	b	b	b	b	b	b	b	b	b	b	b	b	b	b	b	b	b	b	-	b	b	b	b	b	b	b	b	b	b	b	b	b	b	b	b	b	b	b	b
IWB34424	a	b	b	b	a	a	a	b	a	a	a	a	b	b	b	a	a	a	b	b	b	a	b	b	b	b	a	b	b	b	a	a	b	b	b	b	b	b	b	b	b	b	a	b	b	b	b	a	b
IWB42816	a	a	a	a	a	b	a	a	a	b	a	a	a	a	a	a	a	a	a	b	a	a	a	a	a	a	b	b	a	a	b	a	a	a	a	a	a	a	a	a	a	b	b	a	a	b	a	a	a
IWB10462	a	b	a	b	b	b	b	b	b	b	b	a	a	a	a	b	b	b	b	b	b	a	b	b	a	a	a	b	a	a	b	a	a	a	b	b	a	b	a	b	a	b	b	b	b	b	a	a	b
IWB32610	b	b	a	b	b	a	a	b	b	b	b	a	b	b	b	b	b	b	b	b	b	b	b	b	b	b	b	b	a	a	b	b	b	b	a	b	b	b	b	a	b	b	b	b	b	b	b	b	b
IWB72100	a	a	a	a	a	a	a	a	a	-	a	a	a	a	a	a	a	a	a	a	b	a	a	a	a	a	a	a	a	a	a	a	a	a	b	b	a	a	b	a	a	b	a	a	a	a	a	a	a
IWB74821	-	b	b	b	b	b	b	b	b	a	a	b	b	b	a	b	b	b	b	b	b	b	b	a	b	b	b	b	a	b	b	a	b	b	b	b	b	b	b	b	b	a	a	a	a	b	a	b	b
IWB63894	b	a	a	b	b	b	b	b	b	a	a	b	b	b	a	b	b	b	b	b	a	b	b	b	b	b	b	a	a	a	b	b	b	b	b	b	b	b	b	b	b	b	b	a	a	b	b	b	b
IWB4316	-	a	a	b	b	b	b	b	b	b	b	b	b	b	b	b	b	b	b	b	b	a	b	b	b	b	a	b	b	b	b	b	b	b	a	b	b	a	b	b	b	b	a	b	b	b	b	b	a
IWB3391	a	a	a	a	a	a	a	a	b	a	b	a	a	b	a	a	a	a	a	a	a	a	a	a	a	a	a	a	a	a	a	a	a	a	a	a	a	b	a	a	a	a	a	a	a	a	b	a	a
IWB47072	a	b	a	a	a	a	a	b	b	a	a	b	b	b	b	a	b	b	a	b	a	a	b	a	-	b	b	b	b	a	b	b	b	b	b	a	a	b	a	a	a	a	a	a	a	a	-	b	b
IWB43191	-	a	a	b	b	b	b	a	a	b	b	a	a	b	a	b	a	a	b	a	b	a	a	a	a	a	a	a	b	a	b	a	a	a	a	a	a	a	a	a	a	a	a	a	a	b	b	a	a
IWB62395	a	a	b	a	a	b	b	a	a	a	a	a	a	a	b	a	a	a	a	b	a	a	a	a	a	a	a	a	a	-	b	a	a	a	a	a	a	a	b	b	b	b	b	b	a	b	b	a	b
IWB6083	-	b	b	b	b	b	b	a	b	b	b	a	b	b	b	b	b	b	b	b	b	b	a	a	a	b	b	b	b	b	b	b	b	b	b	b	b	b	b	b	b	b	b	b	b	b	b	b	b
IWB70173	b	b	b	a	a	a	a	b	a	a	a	b	b	a	b	a	a	a	a	b	b	b	a	a	a	a	b	b	b	b	b	b	b	b	b	a	b	b	b	b	b	b	b	b	b	a	b	a	b
IWA5200	a	b	a	b	b	a	a	b	b	b	b	a	a	a	a	b	a	a	b	b	a	a	a	a	b	a	a	a	a	a	b	a	a	a	b	a	b	b	a	a	a	a	a	a	a	b	a	b	a
IWB63198	b	b	b	a	b	b	b	a	a	b	b	b	-	a	b	a	a	a	a	b	a	b	a	a	a	a	b	a	a	b	a	b	b	b	b	a	b	b	a	b	b	a	b	a	b	b	b	b	b
IWB2398	-	a	a	a	a	a	a	a	a	a	a	b	a	b	a	a	a	a	a	a	b	b	a	b	a	b	a	a	a	a	a	b	b	b	b	a	a	a	a	a	a	a	a	a	a	a	b	a	b
IWB69929	-	b	b	b	b	b	b	b	b	b	b	b	b	b	b	b	b	b	b	b	b	b	b	b	b	b	b	b	b	b	b	b	b	b	b	b	b	b	b	b	b	b	b	b	b	b	a	b	b
IWB30184	a	b	b	b	b	b	b	b	b	b	b	-	b	b	b	b	b	b	b	b	b	b	b	b	b	b	b	b	b	b	a	b	b	b	b	b	b	b	b	b	b	b	b	b	b	b	b	b	b
IWB24098	-	a	a	a	a	a	a	b	a	b	b	b	b	a	a	a	a	a	a	b	a	b	a	a	b	-	-	b	a	b	a	b	b	b	b	a	b	b	a	b	a	a	b	a	a	a	a	a	b
IWB29648	b	a	b	b	a	b	b	a	b	b	a	a	b	b	b	a	a	a	b	a	a	a	a	a	a	a	a	a	a	b	a	b	b	b	a	a	a	a	a	a	a	a	b	a	a	a	a	a	b
IWB36379	-	b	b	a	b	a	a	b	b	a	b	b	b	a	a	a	b	b	a	b	b	a	b	a	a	b	b	b	b	b	b	b	b	b	b	b	a	b	b	b	b	b	b	b	b	b	b	b	a
IWB22385	-	b	a	a	a	b	b	a	b	b	b	b	a	a	a	a	a	a	a	a	a	a	a	b	b	b	b	a	a	a	b	a	a	a	a	a	b	a	a	a	a	a	a	a	a	a	a	a	a
IWB7379	b	a	a	a	a	b	b	a	a	b	b	b	a	b	b	a	a	a	a	b	b	b	a	b	a	a	b	a	a	b	b	b	b	b	b	a	a	a	b	a	b	b	a	b	b	b	b	a	a
IWA3780	b	a	a	a	a	a	a	a	a	a	b	a	b	b	b	a	a	a	a	a	b	b	a	b	a	a	b	a	a	b	b	b	b	b	a	a	a	a	b	a	b	b	a	a	a	a	b	a	a
IWB63549	b	b	b	b	b	b	b	b	b	a	a	b	b	b	a	b	b	b	b	b	b	b	b	b	a	b	b	b	b	b	b	b	b	b	b	b	b	b	b	b	b	b	b	b	b	b	b	a	a
IWB64167	-	a	a	a	a	a	a	b	a	a	a	a	b	a	a	a	a	a	a	b	b	a	a	a	a	a	a	a	b	a	a	b	a	a	a	b	a	a	a	b	b	b	a	b	b	a	a	a	a
IWB53740	b	b	b	b	b	b	b	b	a	b	a	b	b	b	a	b	b	b	b	a	a	a	b	b	b	b	b	b	b	b	b	b	b	b	a	b	b	a	b	b	b	b	b	b	b	b	b	b	a
IWB62271	a	b	b	a	a	a	a	b	b	b	b	b	a	a	a	a	a	a	a	a	a	a	a	b	a	b	a	a	a	a	a	a	a	a	a	a	a	a	a	a	a	a	a	a	a	a	a	a	b
IWA1691	b	a	b	b	b	a	a	b	b	b	b	a	b	a	a	b	b	b	b	b	b	b	a	a	a	b	a	a	b	b	a	b	b	b	b	b	b	b	a	a	a	a	a	a	a	b	a	b	b
IWB4721	b	a	b	b	b	b	b	a	a	a	a	b	b	b	b	b	b	b	b	b	b	b	a	b	a	b	b	a	b	b	b	b	b	b	b	a	b	a	a	a	a	a	b	a	a	a	b	b	b
IWA3864	a	b	b	b	b	a	a	a	b	b	b	a	a	b	b	a	b	b	a	b	b	b	a	a	a	a	b	a	b	a	b	b	a	a	a	a	b	a	a	b	b	b	b	a	a	b	b	b	a
IWB39214	b	a	a	a	b	a	a	b	b	b	b	b	a	a	a	a	a	a	a	b	b	a	a	a	a	a	a	b	b	a	b	b	b	b	a	a	a	b	b	b	b	b	b	b	b	b	b	b	a
IWA3489	a	b	a	b	b	b	b	b	b	b	b	b	b	b	b	b	b	b	b	a	b	b	b	b	b	b	b	a	a	a	b	a	a	a	a	b	b	a	a	a	b	a	a	b	b	b	b	b	b
IWA5127	b	b	b	a	a	a	a	a	a	a	a	a	a	a	a	a	b	b	a	a	b	a	a	a	a	b	b	a	b	a	a	a	a	a	a	b	a	a	b	a	a	a	a	a	a	a	a	a	a
IWB57437	-	a	b	a	a	a	a	a	a	b	b	a	a	b	b	a	a	a	a	a	a	a	a	a	b	b	b	a	b	a	a	a	a	a	a	b	a	a	a	a	a	a	a	a	a	a	a	b	b
IWB62397	b	a	b	a	a	b	b	a	a	a	a	a	a	a	b	a	a	a	a	b	a	a	a	a	a	a	a	a	a	b	b	a	a	a	a	a	a	a	b	b	b	b	b	b	a	b	b	a	b
IWB66086	b	b	a	b	a	b	b	b	b	a	a	b	b	b	a	b	a	a	b	b	b	b	a	b	b	a	b	b	a	a	b	a	b	b	b	b	a	b	b	b	b	b	a	b	b	b	b	b	b
IWB72592	a	b	a	b	b	b	b	b	b	b	a	b	a	b	b	b	b	b	b	a	a	a	b	a	a	a	b	b	b	b	b	b	b	b	b	b	a	a	a	b	a	b	b	b	b	a	a	b	a
IWB8537	b	b	b	b	b	b	a	a	b	a	b	a	b	b	b	a	b	b	a	b	b	a	b	a	a	a	a	b	a	a	a	a	a	a	b	b	a	b	b	b	b	b	b	b	b	b	b	a	a
IWB35420	b	a	b	b	b	b	b	b	b	a	a	b	b	a	a	b	b	b	b	b	b	b	b	b	a	b	b	b	b	b	b	b	b	b	a	b	a	a	b	b	b	b	b	b	b	a	a	b	b
IWA850	b	b	a	b	b	a	a	a	a	a	a	a	a	a	a	a	b	b	a	b	a	a	b	b	b	b	a	b	a	b	a	b	b	b	b	b	b	a	a	a	a	b	a	b	b	a	b	b	b
IWA5743	b	b	a	a	a	a	b	b	b	b	b	b	b	a	a	a	a	a	a	b	a	b	a	b	a	b	b	a	-	a	b	b	a	a	b	b	b	b	b	a	a	b	a	b	b	b	b	a	b
IWB62041	b	a	b	a	a	a	a	a	a	b	b	b	b	a	a	a	a	a	a	b	a	a	a	a	b	b	a	b	a	a	b	b	b	b	a	b	a	a	b	b	b	b	a	b	b	b	b	a	b
IWB8705	a	a	a	a	a	a	a	a	a	a	a	a	a	b	a	a	a	a	a	a	b	a	b	b	a	a	a	a	b	a	a	a	a	a	a	a	a	b	a	a	a	-	a	a	a	a	a	a	a
IWB11167	b	a	a	b	b	b	b	b	a	b	b	a	a	a	a	a	b	b	b	a	a	a	b	b	a	a	a	a	a	a	a	a	a	a	a	a	a	b	a	a	a	a	a	a	a	a	a	a	a
IWB10135	a	a	b	a	a	a	a	a	a	a	a	a	b	a	a	a	a	a	a	b	b	a	a	a	a	b	b	a	a	b	a	b	b	b	a	a	a	b	b	b	b	b	a	b	b	b	b	b	b
IWB7956	a	b	a	a	a	b	b	a	a	b	b	a	b	a	a	a	a	a	a	b	b	a	a	a	b	b	a	b	a	a	b	a	a	a	b	b	b	b	b	b	b	b	b	b	b	b	b	b	b
IWA5454	-	a	a	b	b	a	b	b	a	a	a	b	a	b	a	b	b	b	b	a	a	a	a	b	a	a	b	b	b	b	a	b	b	b	a	b	a	a	a	a	a	a	b	a	a	a	a	b	b
IWB8252	b	b	a	a	a	b	b	a	a	a	a	a	a	b	a	a	b	b	a	b	a	a	a	a	b	a	a	b	b	a	b	b	a	a	a	a	a	b	a	a	a	a	a	a	a	a	a	a	a
IWA4379	b	a	a	b	a	b	b	b	a	b	b	b	b	b	a	a	b	b	b	a	a	a	b	a	a	a	a	a	a	b	b	b	b	b	a	a	a	a	a	b	b	b	a	a	a	a	a	a	b
IWB8905	a	b	a	a	a	b	b	b	b	b	b	a	b	a	a	a	a	a	a	a	b	b	b	b	a	a	a	b	a	b	a	a	a	a	a	b	a	b	b	-	b	b	a	b	b	b	b	a	a
IWB8581	b	b	b	b	b	b	b	b	a	b	b	b	b	b	b	b	b	b	b	b	b	b	b	b	b	a	b	b	b	b	b	b	b	b	b	b	a	b	a	a	a	a	b	a	a	a	b	b	b
IWB8052	b	a	a	a	a	a	a	a	a	a	a	a	a	a	a	a	a	a	a	a	a	a	a	b	a	a	a	a	a	a	b	b	b	b	a	a	a	a	a	a	a	a	a	a	a	a	a	a	a
IWB48878	b	b	a	a	a	a	a	a	a	a	a	a	b	a	a	a	a	a	a	a	b	b	a	b	a	a	a	b	a	a	b	b	b	b	b	a	a	b	b	b	b	b	a	b	b	b	b	a	a
IWA3567	-	a	b	b	b	b	b	b	b	b	b	b	a	b	b	b	b	b	b	b	b	a	b	b	b	b	b	b	b	b	a	a	a	a	-	a	a	a	b	a	b	b	a	a	a	a	b	a	b
IWB9056	b	a	b	a	a	a	a	b	b	a	a	a	b	b	a	a	b	b	a	a	a	b	b	b	b	a	a	a	a	a	a	b	b	b	a	a	a	b	a	b	b	a	b	a	b	a	a	b	b
IWA6994	b	-	b	b	b	b	b	b	a	a	a	b	a	a	b	b	b	b	b	b	b	a	a	a	a	b	b	b	b	b	b	b	b	b	b	a	b	b	b	b	b	-	a	-	-	b	b	a	a
IWB49321	-	a	a	b	b	a	a	b	a	a	a	a	a	a	a	b	b	b	b	b	a	a	a	a	a	a	b	b	a	b	a	b	b	b	a	a	a	a	b	b	b	b	a	a	a	a	b	a	a
IWB48788	b	a	a	b	b	b	b	b	b	a	a	b	b	b	a	b	b	b	b	b	b	b	b	b	a	b	b	b	b	b	b	b	b	b	b	b	a	b	b	b	b	b	a	b	b	b	b	a	a
IWB3607	a	b	b	b	b	b	b	a	b	b	b	b	b	b	b	a	b	b	b	b	a	b	b	b	b	b	b	a	b	b	b	b	b	b	b	a	b	b	b	b	b	b	a	b	b	b	a	a	b
IWB41962	b	b	a	b	b	b	b	b	a	a	a	a	a	a	a	b	b	b	b	b	a	b	a	a	a	a	a	a	b	b	a	b	b	b	b	b	a	b	a	a	a	a	a	a	a	a	a	a	a
IWB3512	b	a	b	b	b	a	a	b	b	b	b	b	b	b	b	b	b	b	b	b	b	a	b	b	-	b	b	b	a	-	a	b	b	b	a	a	b	a	b	b	b	b	b	b	b	b	b	b	b
IWB41534	b	a	a	b	b	b	b	a	a	b	b	a	a	b	a	b	b	b	b	a	a	a	a	a	a	a	a	b	b	a	a	b	b	b	a	a	a	a	a	a	a	a	a	a	a	a	a	a	a
IWB230	a	a	b	b	b	b	a	b	a	a	a	b	a	a	b	b	b	b	b	a	a	a	a	a	a	a	b	b	a	b	a	a	a	a	a	a	b	a	a	a	b	a	b	a	a	a	a	b	b
IWB24915	b	b	a	a	a	a	a	b	a	b	b	a	a	a	a	a	a	a	a	a	b	b	b	b	a	a	b	b	a	a	a	b	b	b	b	b	b	b	b	b	b	a	a	b	b	b	b	a	b
IWB68625	-	b	b	b	b	a	a	a	b	a	a	-	b	b	b	a	b	b	b	b	b	a	a	b	b	a	a	b	b	b	b	b	b	b	a	b	-	a	b	b	b	b	a	b	b	b	b	b	b
IWA5154	a	a	a	b	a	a	a	a	a	a	b	b	a	a	a	a	b	b	a	b	b	a	b	a	a	b	a	b	b	b	a	a	a	a	a	-	a	a	b	b	b	b	b	b	b	a	b	b	a
IWB9252	b	b	b	a	a	a	a	a	a	a	a	a	b	a	b	a	a	a	a	a	a	b	a	b	a	b	a	a	a	a	b	a	a	a	b	a	b	b	a	a	a	a	b	a	a	b	b	b	a
IWB47615	b	a	b	a	a	b	b	a	b	b	b	a	b	b	a	a	b	b	b	b	b	b	a	a	a	a	b	b	b	b	b	a	a	a	a	a	a	b	a	a	a	a	a	a	a	a	a	b	a
IWB29386	a	a	a	a	a	a	a	a	a	a	b	a	a	a	a	a	b	b	a	a	b	a	a	a	a	a	a	b	a	a	a	a	a	a	b	b	a	b	b	b	b	a	a	a	b	a	b	a	a
IWB45605	b	b	b	b	b	b	b	b	b	b	b	b	b	b	b	b	b	b	b	a	b	b	b	b	b	b	-	a	a	b	b	b	b	b	a	a	b	b	b	b	b	b	b	b	b	b	b	b	b
IWB31075	b	a	b	b	b	b	b	a	b	a	b	b	b	b	b	a	a	a	b	b	b	a	b	b	b	a	a	b	a	b	b	b	b	b	a	a	a	a	b	b	b	b	b	b	b	b	b	b	b
IWB35169	b	a	a	a	a	a	a	a	b	a	a	b	a	b	a	a	a	a	a	a	b	b	a	a	a	a	a	a	a	a	a	b	b	b	a	a	a	a	b	b	b	b	a	b	a	a	b	a	a
IWB605	b	b	b	b	b	b	b	a	b	b	a	b	b	b	a	b	b	b	b	b	b	b	b	b	b	b	b	a	b	b	a	a	a	a	b	b	b	b	a	a	a	b	b	b	b	b	b	b	b
IWB44669	b	b	b	b	b	a	a	a	a	b	b	a	a	a	a	b	b	b	b	a	a	a	b	b	b	b	a	a	a	a	a	a	a	a	a	b	a	a	a	a	a	a	a	a	a	a	a	a	b
IWB58532	b	b	b	b	b	b	b	a	b	b	b	b	a	b	b	b	b	b	b	b	b	b	a	b	b	b	b	b	b	b	b	b	b	b	b	b	a	b	b	b	b	b	b	b	b	b	b	b	b
IWA3450	-	a	a	a	a	b	b	b	b	a	b	b	b	b	b	a	a	a	a	a	a	a	a	b	b	a	a	a	a	b	b	a	a	a	a	a	a	a	a	a	a	a	b	a	a	b	a	b	b
IWB7330	-	b	b	a	a	a	a	b	a	b	a	b	a	a	b	a	a	a	a	b	a	b	b	b	b	b	b	a	a	b	a	b	b	b	b	b	b	b	a	a	a	a	a	a	a	a	b	b	b
IWB49281	b	b	a	b	b	b	b	b	b	b	b	b	b	a	b	b	b	b	b	b	-	b	b	b	b	b	b	b	a	b	b	a	a	a	b	b	b	b	a	a	a	a	b	a	a	b	a	b	b
IWB48855	b	a	b	a	a	a	a	b	b	a	a	b	b	b	b	b	a	a	b	b	b	a	b	a	b	a	b	a	a	b	a	b	b	b	a	a	b	a	b	b	b	b	b	a	b	b	b	b	b
IWB67415	a	a	b	b	b	a	a	a	b	b	a	b	a	b	b	b	b	b	a	b	b	b	a	a	a	a	b	b	b	a	b	b	b	b	a	a	a	b	b	b	b	b	b	b	b	b	a	b	a
IWB56853	b	a	b	b	b	b	b	b	a	b	b	b	a	a	a	b	b	b	b	a	a	b	b	b	b	b	a	a	a	b	b	b	b	b	b	b	b	b	a	a	a	a	a	a	a	a	a	a	b
IWB68255	-	a	a	a	a	a	a	a	a	a	-	b	a	b	b	a	a	a	a	b	b	a	a	b	b	a	a	a	a	b	b	b	a	a	a	b	a	b	b	a	a	b	b	b	b	b	a	b	b
IWA3797	-	b	b	b	b	b	b	a	a	b	a	a	a	a	a	b	b	b	b	a	b	b	b	a	b	b	b	a	a	a	a	a	a	a	b	b	b	b	a	a	a	b	b	b	b	a	b	b	b
IWB34312	a	b	b	b	b	b	b	b	b	a	a	b	b	b	b	b	b	b	b	a	b	b	a	b	b	a	a	a	b	b	b	b	b	b	b	a	a	b	a	a	a	a	a	a	a	a	a	b	a
IWB14244	b	a	b	a	b	a	a	b	b	b	a	b	a	a	b	b	a	a	b	b	b	b	a	a	a	a	b	b	a	a	b	b	b	b	a	b	b	a	b	b	b	b	a	a	a	b	b	b	b
IWB33740	a	b	b	b	a	b	b	b	b	b	a	a	b	b	b	b	b	b	a	a	a	b	a	b	b	b	b	a	b	b	a	b	b	b	b	b	a	a	a	a	a	a	b	a	a	a	a	b	b
IWB34443	b	a	b	a	a	a	a	b	b	a	a	b	b	a	b	a	a	a	a	a	a	a	a	a	b	a	a	a	b	a	b	b	b	b	b	b	b	b	a	a	-	a	b	a	a	a	a	a	b
IWB28178	-	a	a	a	a	a	a	b	a	a	b	a	a	b	a	a	a	a	a	b	b	a	a	a	b	a	a	b	b	a	b	b	b	b	a	a	a	a	a	a	a	a	b	a	a	a	b	a	a
IWB35525	a	b	a	b	b	a	a	b	b	b	b	b	a	b	a	b	b	b	b	b	a	b	b	b	b	b	b	b	a	b	b	b	b	b	b	a	b	b	b	b	b	b	b	b	b	b	b	b	b
IWA6033	b	a	b	a	a	a	a	b	b	a	a	b	b	b	b	a	a	a	a	a	a	a	a	a	b	b	b	a	b	b	b	b	b	b	a	a	a	a	a	a	a	a	b	a	b	a	a	a	a
IWB24882	a	a	a	a	a	b	b	b	b	a	a	b	b	b	b	a	a	a	a	a	a	b	a	a	a	a	a	a	b	a	b	a	a	a	b	a	b	b	a	a	-	a	b	a	a	a	a	a	a
IWB47075	a	a	a	b	b	b	b	b	b	a	a	b	b	b	b	b	b	b	a	a	a	b	a	b	b	b	a	a	b	b	b	a	a	a	b	a	b	b	a	a	b	a	b	a	a	a	b	a	a
IWB59130	a	b	b	b	b	b	b	b	b	a	b	a	b	b	a	b	b	b	b	a	b	a	b	a	b	b	b	b	b	b	b	a	b	b	b	b	b	-	b	b	b	b	b	b	b	b	b	b	b
IWB54423	b	b	b	b	b	b	b	b	b	b	a	b	b	b	a	b	b	b	b	b	b	b	b	b	b	b	b	b	b	a	a	b	b	b	b	b	b	b	b	b	b	b	b	b	b	b	a	a	b
[truncated: 2,593 more rows]
[truncated: 286 more columns]

## Sheet: S3-Map
Table S3 Consensus map of the selected markers
Marker	Chromosome	Position ('000'000)
IWB31869	1A	42.4
IWB25590	1A	51.48
IWA6644	1A	51.66
IWB71424	1A	59.73
IWB7436	1A	60.93
IWB7470	1A	66.54
IWB57448	1A	66.54
IWB8696	1A	74.3
IWB35459	1A	89.89
IWB10730	1A	108.79
IWB38771	1A	108.79
IWB24379	1A	109.32
IWB25932	1A	109.32
IWB60070	1A	110.09
IWB45180	1A	117.68
IWB59865	1A	117.68
IWB63712	1A	117.68
IWB73615	1A	117.68
IWB5889	1A	133.63
IWB72794	1A	133.63
IWA414	1A	134.22
IWB59245	1A	141.85
IWB68663	1A	149.6
IWB21708	1A	157.77
IWA4163	1A	157.77
IWB14137	1A	159.05
IWB54363	1A	159.96
IWA7050	1A	160.39
IWB42659	1A	165.56
IWB3419	1A	170.38
IWB9425	1A	170.38
IWB46201	1A	170.38
IWB61685	1A	170.38
IWB13911	1A	173.23
IWB44045	1A	173.23
IWB47933	1A	175.43
IWB47652	1A	184.34
IWB52903	1A	184.34
IWB71771	1A	195.09
IWB43982	1A	202.05
IWB45812	1A	202.05
IWB59951	1A	202.05
IWB21167	1A	207.64
IWA2656	1A	212.53
IWB1803	1A	216.46
IWB23434	1A	216.46
IWB25890	1A	216.46
IWB51225	1A	216.46
IWB57634	1A	216.46
IWB65607	1A	216.46
IWA1613	1A	216.46
IWA5031	1A	216.46
IWB8898	1A	218.57
IWB11427	1A	218.57
IWB30482	1A	218.57
IWB43481	1A	218.57
IWB65878	1A	219.38
IWB72053	1A	219.38
IWB24089	1A	219.53
IWB30251	1A	219.53
IWB44145	1A	219.53
IWA3884	1A	219.53
IWA4797	1A	219.53
IWA8026	1A	219.53
IWA4326	1A	220.71
IWB31924	1A	224.2
IWB22535	1A	226.88
IWB42357	1A	229.38
IWB75207	1A	229.38
IWB63891	1A	230.75
IWA490	1A	230.92
IWA3666	1A	230.92
IWB52305	1A	235.11
IWB57702	1A	235.11
IWB44485	1A	237.26
IWB9607	1A	240.18
IWB10043	1A	240.18
IWB11515	1A	240.18
IWB21564	1A	240.18
IWB28550	1A	240.18
IWB35955	1A	240.18
IWA1608	1A	240.18
IWA6835	1A	240.18
IWB57961	1A	241.88
IWA7018	1A	241.97
IWB50788	1A	248.7
IWA5174	1A	251.78
IWB36076	1A	256
IWB45915	1A	256
IWB65763	1A	256
IWA162	1A	256
IWB72080	1A	258
IWB43631	1A	258.46
IWB12119	1A	260.38
IWB22613	1A	260.38
IWB64538	1A	260.38
IWB9335	1A	261.32
IWB25442	1A	262.13
IWA2703	1A	265.98
IWB46448	1A	267.41
IWB38172	1A	270.05
IWA6144	1A	271.29
IWA6729	1A	274.32
IWB65551	1A	276.27
IWB1981	1A	289.05
IWA339	1A	289.05
IWB27260	1A	289.38
IWB6354	1A	291.66
IWB13379	1A	291.66
IWB7965	1A	295.05
IWB36553	1A	295.05
IWB2243	1A	312.46
IWB29054	1A	312.46
IWB56553	1A	312.46
IWA4538	1A	313.85
IWB11558	1A	317.79
IWB72589	1A	317.79
IWB6995	1A	321.58
IWB31771	1A	321.58
IWB26829	1A	323.65
IWB29580	1A	326.51
IWB31651	1A	326.51
IWB53469	1A	326.51
IWB65422	1A	326.51
IWB50892	1A	328.14
IWA3804	1A	328.14
IWB40130	1A	329.26
IWB24480	1A	333.66
IWA691	1A	341.75
IWA1225	1A	344.08
IWB72557	1A	344.32
IWB62134	1A	344.45
IWB23299	1A	349.52
IWB7754	1A	351.3
IWB41064	1A	351.3
IWB64553	1A	351.3
IWB24001	1A	356.3
IWB37296	1A	356.3
IWB45733	1A	356.3
IWB62509	1A	357.09
IWB39439	1A	358.75
IWB72161	1A	394.41
IWA2784	1A	394.79
IWB36704	1A	397.53
IWB77	1A	401.68
IWB24000	1A	401.68
IWA3146	1A	401.68
IWA7316	1A	401.68
IWB62751	1A	404.32
IWA6191	1A	406.22
IWB29244	1A	411.15
IWB49386	1A	411.15
IWB41445	1A	411.61
IWB36475	1A	415.45
IWA6152	1A	415.71
IWB3070	1A	418.4
IWB12293	1A	423.4
IWA2317	1A	423.4
IWB7275	1A	425.16
IWA4021	1A	431.5
IWB73664	1A	432.07
IWB12340	1A	435.16
IWB36325	1A	435.16
IWA6312	1A	437.02
IWB35143	1A	439.42
IWB877	1A	440.38
IWB34620	1A	440.38
IWB8918	1A	445.92
IWB34513	1A	459.02
IWA4518	1A	459.02
IWB24575	1A	462.61
IWB30871	1A	467.04
IWA6916	1A	473.04
IWB28413	1A	474.64
IWB65294	1A	475.71
IWB65748	1A	477.23
IWB22896	1A	480.56
IWB64147	1A	481.08
IWA3661	1A	481.08
IWB42054	1B	23.78
IWB21697	1B	31.34
IWB21698	1B	31.34
IWB69597	1B	34.59
IWB3983	1B	35.47
IWB11262	1B	35.47
IWB73377	1B	35.47
IWB27196	1B	37.52
IWB60129	1B	38.96
IWB52681	1B	52.65
IWB14010	1B	63.87
IWB30468	1B	71.09
IWB44448	1B	71.09
IWB43001	1B	92.96
IWB1063	1B	95.27
IWB12258	1B	95.27
IWB6905	1B	98.13
IWB22868	1B	102.41
IWB989	1B	102.58
IWB9954	1B	102.58
IWB34847	1B	102.58
IWB16301	1B	128.78
IWB9714	1B	129.09
IWB48350	1B	133.42
IWB64595	1B	133.42
IWB65685	1B	133.8
IWB26731	1B	134.29
IWB47674	1B	134.29
IWB65667	1B	136.82
IWB1744	1B	141.97
IWB10529	1B	142.58
IWB19917	1B	142.58
IWB24465	1B	142.58
IWB40637	1B	142.58
IWB62288	1B	142.58
IWB64596	1B	142.58
IWB72107	1B	142.58
IWB73112	1B	142.58
IWB73358	1B	142.58
IWB73945	1B	147.5
IWA4349	1B	149.76
IWB11726	1B	165.28
IWB36887	1B	171.55
IWB26466	1B	172.32
IWB53745	1B	172.32
IWB6522	1B	182.66
IWB35568	1B	182.93
IWB23664	1B	183.39
IWB31875	1B	183.39
IWB63352	1B	183.39
IWB29475	1B	185.63
IWB56393	1B	185.63
IWA7117	1B	185.63
IWB7314	1B	191.51
IWB7232	1B	195.12
IWB16228	1B	195.12
IWB49423	1B	195.12
IWB54333	1B	195.12
IWB55117	1B	195.12
IWB23525	1B	201.12
IWB1262	1B	201.25
IWB15041	1B	201.25
IWB47894	1B	201.25
IWB65684	1B	201.25
IWB7186	1B	201.43
IWB26937	1B	205.07
IWB41400	1B	205.82
IWB11877	1B	206.01
IWB30161	1B	206.01
IWB31655	1B	206.01
IWB31756	1B	206.01
IWB35316	1B	206.01
IWB35833	1B	206.01
IWA7504	1B	206.01
IWA8392	1B	206.01
IWB40316	1B	206.69
IWB60859	1B	207.14
IWB5323	1B	208.49
IWB8588	1B	208.49
IWB50050	1B	208.49
IWB71887	1B	208.49
IWA3620	1B	208.49
IWB74962	1B	209.09
IWB35618	1B	209.95
IWA6965	1B	209.95
IWB4355	1B	210.15
IWB39630	1B	212.19
IWB24786	1B	214.8
IWB11880	1B	215.54
IWB57335	1B	215.54
IWB57398	1B	215.54
IWB12485	1B	218.35
IWB36032	1B	218.35
IWB62805	1B	218.35
IWB71872	1B	218.35
IWB33517	1B	223.77
IWB25239	1B	224.75
IWB47132	1B	224.75
IWB51889	1B	224.75
IWB74145	1B	224.75
IWA890	1B	224.75
IWA2221	1B	224.75
IWB4968	1B	226.52
IWB2222	1B	226.72
IWB31929	1B	226.95
IWA140	1B	226.95
IWA6684	1B	226.95
IWA141	1B	227.17
IWA188	1B	227.17
IWB45877	1B	231.25
IWB60913	1B	231.25
IWB64308	1B	231.25
IWA2084	1B	237.17
IWA6107	1B	237.62
IWB29900	1B	238.2
IWB42604	1B	238.2
IWB59384	1B	238.2
IWB59481	1B	238.2
IWB8272	1B	239.59
IWB74185	1B	239.98
IWB7684	1B	240.49
IWB38741	1B	240.49
IWB62507	1B	240.49
IWB72645	1B	240.49
IWA491	1B	240.49
IWA7017	1B	240.49
IWB36034	1B	242.72
IWB34913	1B	243.59
IWB6504	1B	246.08
IWB19579	1B	246.08
IWB60433	1B	246.08
IWB26192	1B	248.36
IWB8134	1B	249.95
IWB23054	1B	250.98
IWB25041	1B	250.98
IWB36064	1B	250.98
IWB52480	1B	250.98
IWB71352	1B	250.98
IWA6731	1B	250.98
IWA5635	1B	252.68
IWA2626	1B	253.1
IWB14950	1B	255.13
IWB38151	1B	255.13
IWA5229	1B	255.13
IWA7002	1B	255.13
IWB49695	1B	257.66
IWB22186	1B	260.88
IWB49534	1B	260.88
IWA3684	1B	260.88
IWB22510	1B	261.96
IWB36104	1B	261.96
IWB59152	1B	264.8
IWB71822	1B	266.71
IWB11437	1B	269.73
IWB21824	1B	269.73
IWB34607	1B	269.73
IWB70039	1B	269.73
IWA2586	1B	269.73
IWB11589	1B	273.29
IWB13336	1B	273.29
IWB67865	1B	274.87
IWB10104	1B	276.98
IWB31917	1B	276.98
IWB61639	1B	276.98
IWB61640	1B	276.98
IWB47886	1B	278.7
IWB67348	1B	278.7
IWB42109	1B	282.48
IWA5383	1B	285.82
IWB53316	1B	287.28
IWA3120	1B	287.98
IWA4488	1B	289.04
IWB73403	1B	294.66
IWA8313	1B	294.66
IWB9208	1B	301.51
IWB29959	1B	301.51
IWB6004	1B	303.21
IWB50693	1B	303.21
IWB14749	1B	306.49
IWB38554	1B	306.49
IWB40585	1B	306.49
IWB7161	1B	307.26
IWB27783	1B	311.35
IWB4676	1B	326.54
IWB73032	1B	330.97
IWB6443	1B	341.4
IWB6947	1B	343.59
IWB74776	1B	344.72
IWB1415	1B	344.88
IWB13489	1B	347.44
IWB8152	1B	350.34
IWB44898	1B	351.32
IWA3497	1B	351.32
IWB13006	1B	352.75
IWB62674	1B	352.75
IWB75028	1B	352.75
IWB7144	1B	355.42
IWB71194	1B	355.42
IWB29144	1B	356.34
IWB70380	1B	356.34
IWB42465	1B	357.34
IWA3095	1B	362.65
IWB20313	1B	366.1
IWB6777	1B	368.28
IWB13106	1B	368.28
IWB8409	1B	374.33
IWB41626	1B	374.33
IWB41964	1B	374.33
IWB69407	1B	374.33
IWA696	1B	375.82
IWA8543	1B	375.82
IWB46397	1B	382.27
IWB8004	1B	388.66
IWB35065	1B	389.08
IWB64154	1B	389.08
IWB631	1B	397.68
IWB3081	1B	415.34
IWB31742	1B	415.34
IWB55065	1B	425.71
IWB13172	1B	426.34
IWB31871	1B	426.34
IWB72443	1B	428.89
IWB23021	1B	434.47
IWB40483	1B	434.47
IWA7992	1B	434.47
IWB29684	1B	436.71
IWB65512	1B	449.58
IWA3892	1B	449.58
IWB4839	1B	462.05
IWB9613	1B	462.05
IWA4935	1B	463.46
IWB56410	1B	470.18
IWB73767	1B	484.13
IWB73714	1B	491.82
IWB7523	1B	502.12
IWB34947	1B	502.12
IWB49520	1B	502.12
IWB61210	1B	502.12
IWB27845	1B	509.37
IWB52079	1B	509.37
IWA4694	1B	539.91
IWB73820	1B	541.72
IWB45466	1B	541.99
IWB68524	1B	541.99
IWB7641	1B	549.23
IWB50867	1B	549.23
IWA545	1B	549.23
IWB22503	1B	550.71
IWB55047	1D	5.47
IWB11803	1D	5.63
IWB22056	1D	5.63
IWB42917	1D	5.63
IWB15585	1D	8.88
IWA5996	1D	13.64
IWB36527	1D	35.05
IWB2552	1D	39.42
IWB26984	1D	53.03
IWA7533	1D	53.03
IWB35395	1D	60.7
IWB14343	1D	60.8
IWB60471	1D	63.47
IWB60473	1D	63.47
IWB13406	1D	67.12
IWB45623	1D	71.85
IWB42324	1D	74.77
IWB24130	1D	81.32
IWB61861	1D	100.62
IWB10439	1D	104.72
IWB5767	1D	108.87
IWB7914	1D	108.87
IWB31733	1D	108.87
IWB60722	1D	108.87
IWA57	1D	108.87
IWB43011	1D	114.9
IWB21928	1D	125.23
IWB28070	1D	125.87
IWB38561	1D	125.99
IWB27449	1D	130.49
IWB47546	1D	140.45
IWB43083	1D	149.37
IWB61426	1D	160.42
IWB10655	1D	185.89
IWA3549	1D	185.89
IWB40676	1D	215.43
IWB1242	1D	263.44
IWB59938	1D	263.44
IWB8044	1D	264.24
IWB7254	1D	264.84
IWB71743	1D	264.84
IWB8982	1D	265.08
IWB57795	1D	267.99
IWB29387	1D	275.48
IWB28792	1D	277.93
IWB11800	1D	288.66
IWA6647	1D	291.84
IWB14868	2A	12.53
IWB20060	2A	20.21
IWB58693	2A	20.21
IWA1512	2A	20.21
IWA2427	2A	20.21
IWA2428	2A	20.21
IWB36634	2A	51.37
IWB39924	2A	51.37
IWA6745	2A	58.04
IWB64569	2A	62.13
IWA1562	2A	62.13
IWB45009	2A	65.57
IWB25949	2A	67.37
IWB60618	2A	67.37
IWA4989	2A	67.77
IWB59316	2A	70.88
IWB68947	2A	83.71
IWA7736	2A	83.71
IWB99	2A	86.88
IWB1879	2A	86.88
IWB4070	2A	86.88
IWB21598	2A	86.88
IWB22363	2A	86.88
IWB29102	2A	86.88
IWB37791	2A	86.88
IWB53288	2A	86.88
IWB65059	2A	86.88
IWB65061	2A	86.88
IWB65498	2A	86.88
IWB65522	2A	86.88
IWB68861	2A	86.88
IWB69913	2A	86.88
IWB71136	2A	86.88
IWB72346	2A	86.88
IWA8513	2A	86.88
IWB25230	2A	91.38
IWB66736	2A	100.38
IWB3678	2A	157.96
IWB12622	2A	157.96
IWB25031	2A	157.96
IWB32399	2A	157.96
IWB41233	2A	157.96
IWB42519	2A	157.96
IWB42972	2A	157.96
IWB61793	2A	157.96
IWB68412	2A	157.96
IWB71144	2A	157.96
IWB31559	2A	162.06
IWA5752	2A	162.06
IWB70924	2A	173.96
IWB70932	2A	173.96
IWB5525	2A	177.91
IWB15066	2A	177.91
IWB4956	2A	205.01
IWB32285	2A	209.12
IWB59049	2A	209.12
IWB11359	2A	210.11
IWB7112	2A	214.3
IWA8498	2A	217.13
IWB6086	2A	219.62
IWB22684	2A	219.62
IWB36267	2A	219.62
IWB63137	2A	219.62
IWA5087	2A	223.02
IWB63138	2A	223.11
IWB10896	2A	225.9
IWB13592	2A	225.9
IWB26493	2A	230.67
IWB38844	2A	230.73
IWB42945	2A	247.39
IWB45657	2A	247.39
IWA2433	2A	247.39
IWB54033	2A	250.08
IWB54293	2A	250.83
IWA2526	2A	250.83
IWB70375	2A	255.02
IWA4214	2A	257.26
IWB8574	2A	260.64
IWB40186	2A	260.64
IWB52304	2A	260.64
IWB72462	2A	260.64
IWA4216	2A	261.05
IWB36271	2A	263.91
IWA3280	2A	265.25
IWB7033	2A	265.4
IWB50190	2A	265.4
IWB53010	2A	272.61
IWB69417	2A	272.61
IWB69418	2A	272.61
IWB69419	2A	272.61
IWB8363	2A	273.97
IWA6477	2A	275.08
IWA6478	2A	275.08
IWB6858	2A	276.89
IWB11734	2A	276.89
IWB30108	2A	276.89
IWB72864	2A	276.89
IWB73216	2A	276.89
IWA3520	2A	276.89
IWB57588	2A	292.19
IWB28073	2A	292.43
IWB24282	2A	293.16
IWA6250	2A	296.19
IWB54547	2A	306.38
IWB5782	2A	307.61
IWB10490	2A	308.75
IWB73038	2A	310.51
IWA2730	2A	312.68
IWA8424	2A	312.68
IWB872	2A	312.97
IWA6564	2A	315.94
IWB37466	2A	320.32
IWB71778	2A	320.32
IWB36058	2A	323.27
IWB22006	2A	326.21
IWA3193	2A	326.21
IWA5893	2A	326.21
IWB55668	2A	332.13
IWB1	2A	341.14
IWB329	2A	341.14
IWB3270	2A	341.14
IWB8253	2A	341.14
IWB11681	2A	341.14
IWB13915	2A	341.14
IWB21403	2A	341.14
IWB23105	2A	341.14
IWB24027	2A	341.14
IWB26823	2A	341.14
IWB27678	2A	341.14
IWB28719	2A	341.14
IWB35580	2A	341.14
IWB36097	2A	341.14
IWB39271	2A	341.14
IWB40575	2A	341.14
IWB41389	2A	341.14
IWB50417	2A	341.14
IWB51885	2A	341.14
IWB54724	2A	341.14
IWB57603	2A	341.14
IWB65165	2A	341.14
IWB70506	2A	341.14
IWA5240	2A	341.14
IWB45445	2A	342.69
IWB4635	2A	346.65
IWB8192	2A	346.65
IWB32205	2A	346.65
IWB43505	2A	346.65
IWB44277	2A	346.65
IWB48698	2A	346.65
IWB55922	2A	346.65
IWA581	2A	346.65
IWA4099	2A	346.65
IWB65453	2A	347.82
IWA5378	2A	347.82
IWB1087	2A	348.36
IWB51504	2A	348.36
IWB64539	2A	348.36
IWA3294	2A	348.36
IWA3839	2A	348.36
IWB13477	2A	353.05
IWB26960	2A	355.61
IWB28709	2A	355.61
IWB39193	2A	355.61
IWB55761	2A	355.61
IWA991	2A	355.61
IWA1174	2A	355.61
IWA5793	2A	355.61
IWB25623	2A	355.9
IWB29111	2A	357.48
IWB3592	2A	362.85
IWB59607	2A	362.85
IWA488	2A	362.85
IWA3151	2A	362.85
IWB8551	2A	365.31
IWB39650	2A	365.31
IWB52068	2A	365.31
IWB7310	2A	366.37
IWB44739	2A	368.43
IWB6986	2A	371.31
IWB72693	2A	371.64
IWB37393	2A	375.17
IWB7051	2A	379.02
IWB25538	2A	379.02
IWB32663	2A	379.02
IWB64479	2A	379.02
IWA4396	2A	379.02
IWA5449	2A	379.02
IWA5574	2A	379.02
IWB7479	2A	384.57
IWB7202	2A	384.97
IWB34517	2A	385.17
IWB47527	2A	385.17
IWB54551	2A	385.17
IWB55262	2A	385.17
IWB68084	2A	385.17
IWA8377	2A	385.17
IWA2092	2A	388.71
IWA2640	2A	388.71
IWA8606	2A	388.71
IWA2612	2A	390.04
IWB5777	2A	390.68
IWB70002	2A	391.01
IWB29791	2A	394.36
IWB39123	2A	394.36
IWB26200	2A	401.22
IWA7593	2A	401.22
IWB59333	2A	402.04
IWB59436	2A	407.9
IWB4615	2A	409.73
IWB49915	2A	409.93
IWA5463	2A	409.93
IWB2020	2A	410.9
IWA4375	2A	410.9
IWB47578	2A	411.32
IWB64285	2A	411.32
IWA7148	2A	411.53
IWA5064	2A	413.48
IWB1036	2A	413.64
IWB7166	2A	413.64
IWB11193	2A	413.64
IWB11764	2A	413.64
IWB39857	2A	413.64
IWB60720	2A	413.64
IWB36583	2A	417.53
IWB973	2A	419.28
IWB12522	2A	419.28
IWB43664	2A	419.28
IWB35710	2A	419.6
IWB70425	2A	420.41
IWA2231	2A	426.14
IWB54273	2A	427.05
IWB64379	2A	430.56
IWB11090	2A	431.2
IWA7876	2A	431.2
IWB61745	2A	436.23
IWB32717	2A	439.71
IWA8385	2A	441.49
IWB7563	2A	443
IWB8706	2A	444.07
IWB10182	2A	444.07
IWB13862	2A	444.08
IWB46244	2A	446.22
IWB29817	2A	447.29
IWB30766	2A	447.29
IWB53046	2A	450.79
IWA5959	2A	450.79
IWB5787	2A	453.53
IWA3937	2A	453.53
IWA3919	2A	466.18
IWB10956	2A	467.84
IWB10957	2A	467.84
IWB24212	2A	467.84
IWB31368	2A	467.84
IWB55858	2A	469.34
IWA5686	2A	471.51
IWB34772	2A	473.04
IWB56801	2A	473.04
IWB11146	2A	473.89
IWB71497	2A	473.89
IWA2051	2A	473.89
IWB70188	2A	474.62
IWA8041	2A	476.23
IWB25799	2A	476.91
IWB71948	2A	476.91
IWB3601	2A	479.11
IWB8907	2A	479.11
IWB34572	2A	479.11
IWB35952	2A	479.11
IWB39577	2A	479.11
IWB45464	2A	479.11
IWB49774	2A	479.11
IWB41414	2A	480.02
IWB5740	2A	480.56
IWB12554	2A	480.56
IWB71816	2A	481.2
IWB836	2A	483.12
IWB7597	2A	483.12
IWB28311	2A	486.2
IWB23479	2A	497.75
IWB36825	2A	497.75
IWB64018	2A	497.75
IWB25650	2A	499.71
IWB65881	2A	500.02
IWB13459	2A	500.63
IWB23494	2A	500.63
IWB35540	2A	500.63
IWA2601	2A	500.63
IWA2602	2A	500.63
IWA8036	2A	500.63
IWB27309	2A	501.24
IWB28621	2A	501.34
IWB59980	2A	501.34
IWB72840	2A	501.34
IWB9045	2A	502.19
IWA6798	2A	502.19
IWB72299	2A	502.77
IWB40515	2A	505.26
IWB56077	2A	505.26
IWB64728	2A	505.26
IWB9488	2A	505.8
IWB4353	2A	506.13
IWB10610	2A	506.13
IWB26483	2A	506.13
IWB26593	2A	506.13
IWB34766	2A	506.13
IWB35139	2A	506.13
IWB35564	2A	506.13
IWB38096	2A	506.13
IWB39371	2A	506.13
IWB39958	2A	506.13
IWB51580	2A	506.13
IWB55326	2A	506.13
IWB55863	2A	506.13
IWB67648	2A	506.13
IWB72263	2A	506.13
IWA1917	2A	506.13
IWA7031	2A	506.13
IWB5752	2A	506.15
IWB44066	2A	506.15
IWB58750	2A	506.15
IWB69132	2A	506.15
IWB72501	2A	507.8
IWB41520	2A	517.73
IWB72976	2A	517.73
IWA4491	2A	522.18
IWA7335	2A	522.18
IWA6963	2A	522.66
IWB10627	2A	544.94
IWB41539	2A	544.94
IWB55638	2A	544.94
IWB11730	2A	557.54
IWB6084	2A	561.6
IWB39807	2A	561.6
IWB72112	2A	608.15
IWB27034	2A	614.77
IWB55561	2A	614.77
IWB62879	2A	614.77
IWB75252	2A	614.77
IWB7757	2A	620.45
IWB31968	2B	43.11
IWB9754	2B	54.13
IWB10002	2B	54.13
IWB12069	2B	54.13
IWB24835	2B	54.13
IWB28040	2B	54.13
IWB34938	2B	54.13
IWB45670	2B	54.13
IWB49446	2B	54.13
IWB53806	2B	54.13
IWB55821	2B	54.13
IWB57508	2B	54.13
IWB66351	2B	54.13
IWB74531	2B	54.13
IWA1413	2B	54.13
IWA3407	2B	54.13
IWA7624	2B	54.13
IWB12070	2B	57.5
IWB42101	2B	57.5
IWB29772	2B	61.43
IWB50555	2B	61.43
IWB56956	2B	61.43
IWB56957	2B	61.43
IWB65686	2B	61.43
IWB315	2B	63.24
IWB44869	2B	64.65
IWB49736	2B	64.65
IWB62175	2B	64.65
IWB62754	2B	64.65
IWB32315	2B	64.81
IWB47559	2B	64.81
IWB61884	2B	64.81
IWB7407	2B	66.08
IWB45672	2B	66.08
IWA8128	2B	66.08
IWB25258	2B	66.91
IWB41241	2B	66.91
IWB45010	2B	66.91
IWB17368	2B	75.39
IWB48525	2B	76.64
IWB2281	2B	80.52
IWB3937	2B	80.52
IWB72374	2B	83.72
IWB10931	2B	84.91
IWB24314	2B	84.91
IWB27344	2B	84.91
IWB1898	2B	87.22
IWB9583	2B	87.22
IWB24938	2B	87.22
IWB26871	2B	87.22
IWB43881	2B	87.22
IWB45886	2B	87.22
IWB46230	2B	87.22
IWB55435	2B	87.22
IWB63721	2B	87.22
IWB49863	2B	91.38
IWB22424	2B	103.14
IWB29704	2B	103.14
IWB65752	2B	103.14
IWB10434	2B	104.46
IWB17530	2B	124
IWB62297	2B	124
IWA2407	2B	124
IWB9206	2B	131.38
IWB39756	2B	131.38
IWB43883	2B	131.38
IWB47095	2B	131.38
IWA7936	2B	132.63
IWB4667	2B	135.04
IWB8132	2B	136.18
IWB45061	2B	136.18
IWA6767	2B	136.18
IWB9433	2B	137.62
IWB24177	2B	137.62
IWB32593	2B	154.15
IWB45990	2B	155.52
IWB2310	2B	155.66
IWB22739	2B	155.66
IWB26791	2B	155.66
IWA8124	2B	155.66
IWB35771	2B	159.21
IWB36282	2B	166.33
IWB64873	2B	167.08
IWB21897	2B	172.32
IWB46375	2B	172.32
IWB65469	2B	172.32
IWB66153	2B	178.86
IWB2315	2B	180.45
IWB28203	2B	182.36
IWB62184	2B	182.36
IWB47068	2B	209.3
IWB21536	2B	212.28
IWA5988	2B	212.28
IWA7799	2B	212.28
IWB42859	2B	216.59
IWA4285	2B	217.81
IWB25327	2B	221.54
IWB53473	2B	221.54
IWB23438	2B	222.3
IWB4514	2B	230.89
IWB34673	2B	230.89
IWB55506	2B	230.89
IWA6474	2B	230.89
IWB313	2B	236.5
IWB2702	2B	236.5
IWB72380	2B	236.5
IWB43273	2B	238.81
IWB35644	2B	239.48
IWB3178	2B	240.19
IWB56961	2B	245.97
IWB39654	2B	250.5
IWB2427	2B	253.32
IWB39653	2B	253.32
IWB61862	2B	253.32
IWB40809	2B	254.92
IWB55384	2B	254.92
IWB74618	2B	254.92
IWA4652	2B	254.92
IWB29747	2B	255.74
IWB67031	2B	255.74
IWB68807	2B	255.74
IWB7072	2B	259.03
IWB45731	2B	259.03
IWB61142	2B	259.03
IWB65312	2B	259.03
IWB71313	2B	259.03
IWA5697	2B	259.03
IWA6026	2B	259.03
IWA6943	2B	259.03
IWB32627	2B	261.09
IWB6159	2B	262.16
IWB12550	2B	262.16
IWB31982	2B	262.16
IWB35421	2B	262.16
IWB56017	2B	262.16
IWB35279	2B	262.81
IWB42052	2B	262.81
IWB60831	2B	263.36
IWB28020	2B	268.72
IWB59246	2B	269.95
IWA5392	2B	273.39
IWB22995	2B	277.23
IWB63879	2B	277.23
IWB58252	2B	279.38
IWB12537	2B	279.59
IWB23788	2B	279.59
IWB5684	2B	283.61
IWB8772	2B	283.61
IWB22236	2B	283.61
IWB25795	2B	283.61
IWB26247	2B	283.61
IWB34545	2B	283.61
IWB48240	2B	283.61
IWB57072	2B	283.61
IWB3454	2B	284.97
IWB22257	2B	284.97
IWA607	2B	285.18
IWA3080	2B	285.18
IWB10442	2B	291.73
IWB26101	2B	291.73
IWB32259	2B	291.73
IWB45082	2B	291.73
IWB46789	2B	291.73
IWB62112	2B	291.73
IWB74034	2B	291.73
IWA4642	2B	291.73
IWA4720	2B	291.73
IWB36153	2B	292.15
IWA4323	2B	292.15
IWA897	2B	295.65
IWB38081	2B	295.69
IWA3127	2B	295.69
IWB66885	2B	295.93
IWB47487	2B	297.16
IWB7825	2B	298.27
IWB24624	2B	298.27
IWB40021	2B	298.27
IWB58343	2B	298.27
IWB63682	2B	298.27
IWB10669	2B	299.73
IWB32069	2B	299.73
IWB65565	2B	299.73
IWA7263	2B	299.73
IWA2674	2B	300.93
IWB44316	2B	305.12
IWB58207	2B	305.12
IWB6330	2B	307.29
IWA5811	2B	307.29
IWB65377	2B	308.29
IWB4008	2B	311.02
IWB9381	2B	311.02
IWB22823	2B	311.02
IWB24069	2B	311.02
IWB34732	2B	311.02
IWB38494	2B	311.02
IWB43854	2B	311.02
IWB54789	2B	311.02
IWB62812	2B	311.02
IWA169	2B	311.02
IWA170	2B	311.02
IWA1938	2B	311.02
IWA4388	2B	311.02
IWA6075	2B	311.02
IWA6554	2B	311.02
IWB41729	2B	311.91
IWB52134	2B	311.91
IWA1145	2B	311.91
IWB4546	2B	312.26
IWB61926	2B	312.26
IWB54447	2B	313.29
IWB5274	2B	315.96
IWA2766	2B	315.96
IWB17014	2B	317.98
IWB64813	2B	317.98
IWB65727	2B	317.98
IWB22665	2B	317.99
IWB58159	2B	317.99
IWB59321	2B	317.99
IWB1520	2B	318.81
IWB57571	2B	319.27
IWB952	2B	319.82
IWB37213	2B	319.82
IWB42030	2B	319.82
IWB44294	2B	319.82
IWB52349	2B	319.82
IWA587	2B	319.82
IWA8517	2B	319.82
IWA3452	2B	320.02
IWA3453	2B	320.02
IWB64	2B	320.05
IWB9833	2B	320.05
IWB40211	2B	320.05
IWA6966	2B	320.26
IWB4602	2B	325.61
IWA5128	2B	325.61
IWB61723	2B	327.82
IWA2955	2B	327.82
IWA1689	2B	327.98
IWB50897	2B	330.59
IWB64779	2B	332.28
IWA6317	2B	333.61
IWB44417	2B	334.76
IWB63790	2B	334.76
IWB63896	2B	334.76
IWA243	2B	334.76
IWA5525	2B	334.76
IWB59442	2B	334.84
IWB67261	2B	334.84
IWB69139	2B	334.84
IWA5141	2B	336
IWB34989	2B	337.75
IWB36041	2B	337.75
IWB38293	2B	341.73
IWB71484	2B	341.73
IWA6453	2B	341.73
IWB12137	2B	342.26
IWB65792	2B	342.26
IWB27165	2B	343.15
IWB60039	2B	343.15
IWA7825	2B	343.15
IWB25007	2B	343.61
IWB39865	2B	343.61
IWB68945	2B	343.61
IWB71648	2B	344.38
IWB28591	2B	344.4
IWA5415	2B	344.4
IWB66390	2B	344.69
IWA6076	2B	344.69
IWB7263	2B	346.46
IWB10507	2B	346.46
IWB11092	2B	346.46
IWB42187	2B	346.46
IWB70131	2B	346.46
IWB70437	2B	346.46
IWB73199	2B	346.46
IWB25841	2B	347.42
IWB63105	2B	347.45
IWB32027	2B	347.79
IWB35072	2B	347.79
IWB48484	2B	347.79
IWA2130	2B	347.79
IWA8478	2B	348.3
IWB11689	2B	349.98
IWB32221	2B	349.98
IWA2261	2B	349.98
IWA4356	2B	349.98
IWB48248	2B	350.33
IWB55526	2B	350.33
IWB64817	2B	350.33
IWA1707	2B	350.33
IWA5145	2B	350.33
IWB3603	2B	351.07
IWB6433	2B	351.07
IWB28337	2B	351.07
IWB2452	2B	351.23
IWB3537	2B	351.23
IWB28478	2B	351.23
IWB31015	2B	351.23
IWB32487	2B	351.23
IWB41820	2B	351.23
IWB45055	2B	351.23
IWA7850	2B	351.23
IWB56161	2B	355.39
IWB28798	2B	356.43
IWB13162	2B	360.61
IWB35200	2B	361.95
IWB30560	2B	362.2
IWB56896	2B	363.52
IWB46242	2B	364.07
IWB35840	2B	365.1
IWB26742	2B	365.12
IWB34588	2B	365.88
IWB43278	2B	365.88
IWB45747	2B	365.88
IWB68982	2B	365.88
IWB6732	2B	367.4
IWB11942	2B	367.4
IWB56400	2B	368.5
IWB2943	2B	368.81
IWB44545	2B	368.81
IWB68283	2B	368.81
IWB73211	2B	368.81
IWA2874	2B	368.81
IWB74201	2B	369.85
IWB8386	2B	371.12
IWB41405	2B	371.12
IWB75247	2B	371.12
IWA3176	2B	371.12
IWB34377	2B	371.34
IWB53685	2B	371.34
IWA5024	2B	371.34
IWB55525	2B	371.55
IWB67251	2B	371.55
IWB19788	2B	371.86
IWB46174	2B	374.92
IWB73057	2B	377.79
IWB27746	2B	379.79
IWB44694	2B	381.84
IWB56398	2B	381.84
IWA8195	2B	381.84
IWB69431	2B	382.26
IWB34749	2B	383.58
IWB69629	2B	404.49
IWA8449	2B	404.52
IWB58747	2B	405.76
IWB68445	2B	405.76
IWB7050	2B	412.24
IWB43633	2B	413.94
IWB54357	2B	413.94
IWB6167	2B	413.97
IWB35179	2B	415.19
IWB6888	2B	417.82
IWB23232	2B	417.82
IWB26011	2B	417.82
IWB51349	2B	417.82
IWB7767	2B	418.87
IWB9024	2B	418.87
IWB38059	2B	418.87
IWA5081	2B	418.87
IWA5809	2B	418.87
IWA7112	2B	418.87
IWB10251	2B	419.13
IWB1091	2B	424.15
IWB12574	2B	424.82
IWB66266	2B	424.82
IWB53950	2B	427.34
IWA5007	2B	429.47
IWB1663	2B	431.19
IWB8430	2B	431.19
IWB28108	2B	431.19
IWB61201	2B	431.19
IWB1769	2B	443.79
IWB28564	2B	443.79
IWB44343	2B	443.79
IWB36295	2B	445.03
IWB48440	2B	447.29
IWB54597	2B	448.21
IWB61238	2B	448.21
IWB21324	2B	450.63
IWB64082	2B	452.42
IWB40501	2B	453.71
IWB54701	2B	453.71
IWB24452	2B	457.66
IWB20875	2B	458.55
IWB23686	2B	458.55
IWB61115	2B	458.55
IWB60052	2B	461.38
IWB5439	2B	462.22
IWB71	2B	462.31
IWB30421	2B	462.31
IWB63210	2B	462.31
IWB63604	2B	462.31
IWB22771	2B	465.4
IWB24454	2B	465.4
IWB27094	2B	465.4
IWB27660	2B	465.4
IWB40456	2B	465.4
IWA3474	2B	466.71
IWB1796	2B	467.4
IWB4318	2B	467.4
IWB72278	2B	467.4
IWB24056	2B	468.16
IWB74399	2B	468.25
IWB7819	2B	471.64
IWA746	2B	472.91
IWA1667	2B	472.91
IWB61940	2B	474.97
IWB5978	2B	489.18
IWB36313	2B	489.33
IWB54751	2B	489.33
IWB55807	2B	489.33
IWB62760	2B	489.33
IWA6656	2B	489.33
IWB11295	2B	491.21
IWA4118	2B	491.21
IWA5093	2B	491.21
IWB48388	2B	492.22
IWA3252	2B	495.37
IWB27274	2B	497.52
IWB14028	2B	498.37
IWB12415	2B	504.16
IWB13403	2B	504.16
IWB22135	2B	504.16
IWB23590	2B	504.16
IWB23907	2B	504.16
IWB29461	2B	504.16
IWB59762	2B	504.16
IWB62759	2B	504.16
IWB65625	2B	504.16
IWA8018	2B	504.16
IWA3315	2B	509.02
IWB50793	2B	511.99
IWB75041	2B	511.99
IWB29376	2B	513.87
IWB27000	2B	517.6
IWB8699	2B	517.63
IWB9733	2B	517.63
IWB10623	2B	517.63
IWB11333	2B	517.63
IWB13362	2B	517.63
IWB28691	2B	517.63
IWB48533	2B	517.63
IWB65019	2B	517.63
IWB65020	2B	517.63
IWB74736	2B	517.63
IWB36210	2B	522.33
IWB15636	2B	541.99
IWB46022	2B	542.93
IWB30168	2B	543.29
IWB9495	2B	554.2
IWB22131	2B	555.91
IWB24252	2B	555.91
IWB28735	2B	555.91
IWB34450	2B	555.91
IWB48199	2B	555.91
IWA2946	2B	555.91
IWB19318	2B	575.17
IWB6563	2B	582.25
IWB3970	2B	583.38
IWB36702	2B	583.38
IWB38972	2B	583.38
IWB58695	2B	583.38
IWB63909	2B	583.38
IWB62903	2D	2.48
IWB15863	2D	6.13
IWB47710	2D	12.54
IWA1601	2D	15.87
IWA5772	2D	18.13
IWB17276	2D	22.88
IWB17339	2D	22.88
IWA6156	2D	22.88
IWB16032	2D	25.49
IWB55334	2D	25.49
IWB59557	2D	25.49
IWB11455	2D	30.14
IWB15795	2D	30.14
IWB43695	2D	30.14
IWB46728	2D	30.14
IWA6301	2D	32.08
IWA6302	2D	32.08
IWB7262	2D	33.07
IWB37711	2D	33.79
IWB7001	2D	48.94
IWA989	2D	51.11
IWB27825	2D	75.71
IWB26157	2D	91.7
IWB28572	2D	91.7
IWB53449	2D	91.7
IWB53506	2D	98.12
IWB59950	2D	98.12
IWA7418	2D	98.12
IWA4496	2D	102.72
IWA3248	2D	104.01
IWB62606	2D	106.58
IWB49647	2D	107.38
IWB6461	2D	107.54
IWB12301	2D	107.54
IWB23436	2D	107.54
IWB41586	2D	107.54
IWB44900	2D	107.54
IWB4966	2D	110.3
IWB6175	2D	110.64
IWB61830	2D	110.64
IWB9114	2D	111.38
IWB46874	2D	111.38
IWB17205	2D	113.79
IWB11078	2D	117.32
IWB35998	2D	120.75
IWB8330	2D	126.51
IWB58627	2D	133.17
IWB46550	2D	136.5
IWB56904	2D	136.5
IWB65806	2D	136.5
IWA2961	2D	136.5
IWB60570	2D	138.93
IWA5542	2D	139.94
IWB64395	2D	145.58
IWB57539	2D	146.58
IWA4789	2D	149.84
IWB60488	2D	168.52
IWB64003	2D	169.42
IWB54962	2D	174.53
IWB22279	2D	177.32
IWB14037	2D	183.76
IWB15987	2D	191.17
IWB75181	2D	200.16
IWB3052	2D	205.15
IWB14402	2D	205.15
IWB31124	2D	205.15
IWB74	2D	208.94
IWB2986	2D	208.94
IWB42746	2D	208.94
IWB43946	2D	208.94
IWB23121	2D	215.77
IWB32177	2D	215.93
IWB62525	2D	215.93
IWB64821	2D	216.02
IWB25370	2D	216.17
IWB56279	2D	216.17
IWB44259	2D	216.41
IWB2685	2D	222.41
IWB4172	2D	222.41
IWB4581	2D	222.41
IWB32120	2D	222.41
IWB20375	2D	228.44
IWB2397	2D	228.47
IWB61260	2D	230.88
IWA96	2D	230.88
IWB28458	2D	251.75
IWB16884	2D	252.82
IWB24116	2D	252.82
IWB24769	2D	257.08
IWB56672	2D	257.08
IWB6065	2D	257.66
IWB6956	2D	259.43
IWB6551	2D	260.17
IWB3969	2D	260.85
IWB6133	2D	260.85
IWB21124	2D	260.85
IWB23909	2D	260.85
IWB32049	2D	260.85
IWB35404	2D	260.85
IWB36326	2D	260.85
IWB46027	2D	260.85
IWB46283	2D	260.85
IWB74555	2D	260.85
IWB8811	2D	264.77
IWB10003	2D	264.77
IWB35134	2D	264.77
IWB55640	2D	264.77
IWA551	2D	264.77
IWA3688	2D	264.77
IWB24928	2D	266.28
IWB42342	2D	266.38
IWB48969	2D	266.38
IWB57118	2D	270.11
IWB6623	2D	277.48
IWB42060	2D	277.48
IWB44771	2D	277.48
IWB55543	2D	277.48
IWB74096	2D	277.48
IWB9530	2D	278.17
IWA5978	2D	322.48
IWB73794	2D	324.89
IWB38757	2D	346.53
IWB47227	2D	346.53
IWB38687	2D	368.68
IWB13817	3A	43.03
IWB45132	3A	43.03
IWB72100	3A	43.03
IWB26392	3A	47.94
IWB28492	3A	47.94
IWB32631	3A	47.94
IWB54475	3A	47.94
IWB64734	3A	47.94
IWB72071	3A	47.94
IWB75018	3A	47.94
IWA5429	3A	49.45
IWB35638	3A	51.29
IWB40970	3A	51.29
IWB65712	3A	65.63
IWB27973	3A	66.05
IWB41434	3A	66.05
IWB61619	3A	68.36
IWB13339	3A	74.64
IWB28092	3A	76.94
IWB46311	3A	76.94
IWB57220	3A	76.94
IWA2822	3A	76.94
IWB60530	3A	82.86
IWB60531	3A	82.86
IWB12994	3A	87.97
IWA7259	3A	99.39
IWB41104	3A	107.23
IWB43889	3A	107.23
IWB45764	3A	107.23
IWB57247	3A	107.23
IWB60350	3A	107.23
IWA5969	3A	113.23
IWB3644	3A	135.85
IWB54315	3A	169.84
IWB5655	3A	175.64
IWB53481	3A	177.08
IWB1828	3A	178.89
IWB45555	3A	187.96
IWA2048	3A	187.96
IWA2049	3A	187.96
IWB73771	3A	211.75
IWB11450	3A	218.69
IWB38639	3A	218.69
IWB40102	3A	218.69
IWB47129	3A	218.69
IWA5641	3A	218.69
IWB47146	3A	233.24
IWB65736	3A	233.24
IWB53848	3A	239.06
IWB36930	3A	240.73
IWB61907	3A	242.23
IWB49014	3A	242.85
IWB29753	3A	243.49
IWB28137	3A	246.9
IWB34845	3A	246.9
IWB47000	3A	246.9
IWB55424	3A	246.9
IWB63098	3A	247.07
IWB58700	3A	254.19
IWB35234	3A	260.62
IWB64701	3A	265.37
IWB13522	3A	269.13
IWB29898	3A	269.13
IWB4227	3A	271.98
IWB12478	3A	271.98
IWB39674	3A	271.98
IWB41412	3A	271.98
IWB49539	3A	271.98
IWB2769	3A	273.07
IWB60171	3A	273.07
IWB65939	3A	273.07
IWB40479	3A	274.44
IWA2069	3A	274.44
IWA2763	3A	274.44
IWA5387	3A	274.44
IWA6877	3A	274.44
IWA7064	3A	274.44
IWB38609	3A	276.05
IWB63540	3A	276.05
IWA7114	3A	279.61
IWB37375	3A	280.36
IWA2886	3A	280.36
IWB45424	3A	283.62
IWA4075	3A	283.62
IWA1999	3A	284.21
IWB52364	3A	287.67
IWA236	3A	287.67
IWB8115	3A	288.25
IWB21475	3A	288.25
IWB10578	3A	288.43
IWB10697	3A	288.43
IWB14528	3A	288.43
IWB34796	3A	288.43
IWB49118	3A	288.43
IWB60083	3A	288.43
IWB70678	3A	288.43
IWB73166	3A	288.43
IWA132	3A	288.43
IWA3198	3A	288.43
IWB35578	3A	295.39
IWB62072	3A	295.66
IWB30296	3A	296.36
IWB54481	3A	296.36
IWB54482	3A	296.36
IWB73806	3A	297.27
IWA7073	3A	303.4
IWB8831	3A	321.73
IWA3078	3A	329.07
IWB67653	3A	330.73
IWB23583	3A	334.63
IWB44443	3A	338.65
IWB4503	3A	339.5
IWB65390	3A	339.88
IWB35610	3A	346.87
IWB53914	3A	346.87
IWB71899	3A	346.87
IWB27192	3A	350.21
IWB45321	3A	350.21
IWB65934	3A	350.21
IWB49970	3A	352.12
IWA7696	3A	354.46
IWB53846	3A	359.56
IWB47989	3A	360.5
IWB48913	3A	360.5
IWA1879	3A	360.5
IWB28028	3A	364.89
IWB32537	3A	365.87
IWB5352	3A	375
IWB52941	3A	382.87
IWB7317	3A	390.09
IWB41859	3A	390.78
IWB2973	3A	391.81
IWB11200	3A	391.81
IWB47108	3A	391.81
IWB35125	3A	395.92
IWB8793	3A	410.49
IWB899	3A	433.76
IWB11738	3A	433.76
IWB12516	3A	439.79
IWA6396	3A	450.86
IWB9995	3A	451.86
IWB50481	3A	454.75
IWB24136	3A	458.16
IWB68475	3A	460.63
IWB26070	3A	463.73
IWB26072	3A	463.73
IWB5966	3A	465.22
IWB29012	3A	465.22
IWB50625	3A	465.22
IWB58806	3A	467.8
IWB12652	3A	476.16
IWB41929	3A	476.16
IWB63186	3A	476.16
IWB71198	3A	476.16
IWB74609	3A	476.16
IWA2372	3A	476.16
IWB33546	3A	489.32
IWB72476	3A	491.32
IWB4655	3A	492.9
IWB59491	3A	492.9
IWB70483	3A	492.9
IWB55724	3A	499.53
IWB6092	3A	504.41
IWA1366	3A	504.41
IWA7812	3A	504.41
IWB7790	3A	504.74
IWB46617	3A	504.74
IWB40771	3A	537
IWB34789	3A	541.15
IWB48794	3A	541.15
IWA5111	3A	551.54
IWB39004	3A	555.33
IWB4391	3A	564.57
IWB10331	3A	564.57
IWB28780	3A	564.57
IWB57035	3A	564.57
IWB67819	3A	574.39
IWB59960	3A	595.71
IWA8038	3A	595.71
IWB30714	3A	600.04
IWB50017	3A	600.04
IWB7629	3B	23.14
IWB72603	3B	23.14
IWB24336	3B	23.43
IWB30660	3B	26.22
IWB6491	3B	29.82
IWB8884	3B	38.79
IWB64989	3B	38.79
IWB43766	3B	38.89
IWB36538	3B	42.1
IWA4796	3B	45.03
IWB49924	3B	46.23
IWB29466	3B	47.49
IWB64711	3B	50.58
IWB13199	3B	56.41
IWB19838	3B	56.41
IWB30389	3B	56.41
IWB42119	3B	56.41
IWB51276	3B	56.41
IWB61607	3B	56.41
IWB29059	3B	80.53
IWB74288	3B	85.32
IWA7230	3B	85.32
IWB7919	3B	93.4
IWA2908	3B	93.4
IWB68776	3B	94.75
IWB60771	3B	110.23
IWB6299	3B	111
IWA7231	3B	121.32
IWA7647	3B	126.12
IWB35843	3B	131.93
IWB57994	3B	131.93
IWB10462	3B	136.78
IWB12480	3B	136.78
IWB71834	3B	136.78
IWA2037	3B	136.78
IWB30208	3B	138.41
IWB9189	3B	143.05
IWB17577	3B	143.05
IWB30207	3B	143.05
IWB58617	3B	143.05
IWB8377	3B	149.13
IWB65302	3B	149.13
IWB71403	3B	149.13
IWA4340	3B	149.6
IWB2169	3B	150.54
IWB65330	3B	150.54
IWB49268	3B	169.11
IWB56030	3B	169.11
IWB64860	3B	174.06
IWB9677	3B	183.55
IWB6207	3B	187.22
IWB1583	3B	200.13
IWB35950	3B	204.26
IWB47239	3B	204.29
IWA3983	3B	214.36
IWA8460	3B	224.48
IWB30710	3B	228.92
IWB35437	3B	228.92
IWB5120	3B	229.68
IWB6373	3B	229.68
IWB6294	3B	231.85
IWB10863	3B	231.85
IWB42995	3B	231.85
IWA6632	3B	231.85
IWB5902	3B	236.61
IWB2802	3B	239.08
IWB73082	3B	239.08
IWB27582	3B	240.97
IWB7234	3B	246.52
IWB26800	3B	246.52
IWB29116	3B	246.52
IWB49982	3B	246.52
IWB52841	3B	246.52
IWB26756	3B	249.21
IWB55784	3B	249.21
IWB60996	3B	249.21
IWB66513	3B	249.21
IWA4310	3B	249.21
IWB47168	3B	250.24
IWB53148	3B	250.24
IWB4981	3B	250.63
IWB10783	3B	250.63
IWB65260	3B	250.63
IWB69999	3B	252.35
IWB25047	3B	255.31
IWB70301	3B	255.81
IWA2492	3B	256.15
IWB25473	3B	257.38
IWB27206	3B	261.18
IWB35608	3B	262.18
IWB49980	3B	262.18
IWA5351	3B	262.18
IWB968	3B	262.79
IWB41047	3B	262.85
IWA211	3B	262.85
IWB49639	3B	263.34
IWB41807	3B	266.47
IWB26271	3B	267.09
IWB32129	3B	267.09
IWB23258	3B	269.78
IWB56471	3B	269.78
IWB60252	3B	269.78
IWB60584	3B	269.78
IWB62162	3B	269.78
IWB64939	3B	269.78
IWB65774	3B	269.78
IWA3504	3B	269.78
IWA6380	3B	269.78
IWA7595	3B	269.78
IWB11270	3B	270.64
IWA7905	3B	270.64
IWB63191	3B	274.8
IWA537	3B	274.8
IWA610	3B	274.8
IWB8186	3B	275.44
IWA2800	3B	275.44
IWA4630	3B	275.44
IWB35908	3B	278.84
IWB8908	3B	280.06
IWB1301	3B	280.31
IWA3710	3B	280.31
IWB9786	3B	284.26
IWB35937	3B	284.26
IWB8114	3B	285.32
IWB11894	3B	285.32
IWB54219	3B	285.32
IWB58918	3B	285.32
IWB69438	3B	285.32
IWA4269	3B	285.32
IWA8196	3B	285.32
IWB38942	3B	286.56
IWA1703	3B	287.74
IWA7512	3B	288.43
IWB36059	3B	289.69
IWB48703	3B	292.11
IWB32559	3B	292.97
IWB9708	3B	293.37
IWB22606	3B	293.37
IWB49027	3B	293.37
IWB65525	3B	293.37
IWB53113	3B	295.62
IWA6158	3B	296.86
IWB58359	3B	297.01
IWB63113	3B	297.01
IWA344	3B	297.01
IWB25409	3B	300.72
IWA4841	3B	306.34
IWB40528	3B	307.6
IWB50898	3B	307.6
IWA8137	3B	308.87
IWB7617	3B	312.6
IWB11838	3B	312.6
IWB11839	3B	312.6
IWB38582	3B	312.6
IWB55956	3B	317.77
IWB8515	3B	318.68
IWB47200	3B	319.73
IWB6077	3B	320.47
IWB9529	3B	320.47
IWB14885	3B	320.47
IWB32621	3B	320.47
IWB51334	3B	320.47
IWB54978	3B	320.47
IWB36626	3B	323.92
IWB54440	3B	323.92
IWB3107	3B	326.32
IWA4497	3B	328.7
IWB24723	3B	330.15
IWB25761	3B	337.91
IWB1821	3B	342.02
IWB51093	3B	347.85
IWB73061	3B	347.85
IWB25872	3B	352.25
IWB9005	3B	363.44
IWB38921	3B	363.44
IWB27363	3B	364.54
IWB10344	3B	366.02
IWB23126	3B	366.02
IWB31149	3B	366.02
IWB59671	3B	366.02
IWB72807	3B	381.5
IWA4600	3B	388.05
IWB44445	3B	398.72
IWB44447	3B	398.72
IWB71664	3B	398.72
IWB493	3B	407.26
IWB7789	3B	407.26
IWB32513	3B	407.26
IWB9399	3B	423.69
IWB11935	3B	426.85
IWB72700	3B	428.55
IWB5646	3B	440.55
IWB31790	3B	440.55
IWB10449	3B	450.48
IWA787	3B	461.37
IWB47870	3B	462.46
IWB8700	3B	463.13
IWA786	3B	463.13
IWB60302	3B	468.9
IWA8058	3B	479.54
IWB34424	3B	479.99
IWB72293	3B	494.33
IWB13205	3B	501.39
IWB55652	3B	501.39
IWB29935	3B	528.3
IWB62853	3B	528.3
IWA6273	3B	528.3
IWB42890	3B	539.26
IWB65503	3B	539.26
IWB72077	3B	539.26
IWB72136	3B	539.26
IWB38308	3B	551.3
IWB28802	3B	558.39
IWB36567	3B	558.39
IWB44970	3B	558.39
IWB46870	3B	558.39
IWB67247	3B	558.39
IWB11049	3B	561.95
IWB11701	3B	561.95
IWB32729	3B	568.49
IWB57330	3B	568.49
IWB32732	3B	573.09
IWB40707	3B	573.09
IWB57331	3B	573.09
IWA1756	3B	573.68
IWB42531	3B	577.45
IWB66935	3B	577.45
IWB72194	3B	577.45
IWB5917	3B	578.89
IWB9589	3B	578.89
IWB10310	3B	578.89
IWB10667	3B	578.89
IWB19046	3B	578.89
IWB28522	3B	578.89
IWB58481	3B	578.89
IWB59625	3B	578.89
IWB74099	3B	578.89
IWB44061	3B	617.82
IWB20310	3D	0
IWB57532	3D	0
IWB63461	3D	0
IWB75016	3D	0
IWB1876	3D	11.67
IWB16848	3D	11.67
IWB29480	3D	11.67
IWB31017	3D	11.67
IWB39098	3D	11.67
IWB49841	3D	11.67
IWB65946	3D	11.67
IWB12026	3D	13.29
IWB27536	3D	13.29
IWB29062	3D	14.85
IWB8376	3D	66.85
IWB59502	3D	66.85
IWB63958	3D	68.23
IWB11375	3D	108.03
IWB35063	3D	117.98
IWB32610	3D	121.9
IWA5030	3D	190.25
IWB38826	3D	204.5
IWB50741	3D	204.5
IWB34605	3D	216.86
IWB27117	3D	223
IWB54873	3D	264.68
IWB59242	3D	276.85
IWB63045	3D	276.85
IWB42816	3D	283.69
IWB7480	3D	284.57
IWB7702	3D	284.57
IWB23347	3D	286.14
IWA2088	3D	286.14
IWB18547	3D	294.56
IWB73071	3D	311.12
IWB31419	3D	312.33
IWB18579	3D	314.33
IWB27343	3D	314.33
IWB40499	3D	324.02
IWB4562	3D	338.33
IWB73391	3D	360.83
IWB9976	3D	379.04
IWB17930	3D	379.04
IWB22532	3D	393.33
IWB56510	3D	394.02
IWB8306	3D	414.71
IWB12656	3D	414.71
IWB27498	3D	414.71
IWB152	3D	416.72
IWB5822	3D	416.72
IWB7555	3D	416.72
IWB9142	3D	416.72
IWB13144	3D	416.72
IWB15087	3D	416.72
IWB15088	3D	416.72
IWB27279	3D	416.72
IWB44062	3D	416.72
IWB53719	3D	416.72
IWB55121	3D	416.72
IWB63275	3D	416.72
IWA6777	3D	416.72
IWB7920	3D	420.15
IWA1796	3D	426.93
IWB41561	3D	431.16
IWB50751	3D	431.16
IWB18684	3D	432.46
IWB19228	3D	432.46
IWB25922	3D	432.46
IWB26909	3D	432.46
IWA8059	3D	432.46
IWB4163	3D	434.19
IWB41947	3D	442.9
IWB18421	3D	445.36
IWB1418	3D	445.74
IWB2611	3D	454.76
IWB12509	3D	454.76
IWB13871	3D	454.76
IWB37183	4A	33.66
IWB6735	4A	45.36
IWB8008	4A	45.36
IWA6137	4A	45.36
IWB34577	4A	56.05
IWB38911	4A	62.58
IWB67708	4A	66.62
IWB8337	4A	98.53
IWB11749	4A	105.92
IWB70645	4A	108.18
IWA54	4A	116.79
IWA7632	4A	116.79
IWB52625	4A	120.85
IWB21402	4A	132.07
IWA3993	4A	132.07
IWB6756	4A	138.18
IWB13323	4A	144.91
IWB40011	4A	144.91
IWB40012	4A	144.91
IWB67355	4A	147.89
IWB70442	4A	147.89
IWB40358	4A	148.41
IWA1137	4A	148.41
IWB41676	4A	148.97
IWB3922	4A	157.49
IWB47589	4A	157.49
IWA2533	4A	157.49
IWA603	4A	159.3
IWB1396	4A	160.42
IWB1397	4A	160.42
IWB4316	4A	160.42
IWB6362	4A	160.42
IWA4261	4A	160.42
IWA4479	4A	167.54
IWA1992	4A	168.93
IWB32882	4A	169.69
IWB52694	4A	169.69
IWA4251	4A	169.69
IWB56556	4A	183.88
IWA7382	4A	184.65
IWB21625	4A	185.89
IWB41008	4A	185.89
IWB49921	4A	185.89
IWB63549	4A	185.89
IWA5127	4A	185.89
IWA5457	4A	185.89
IWA7080	4A	185.89
IWA8342	4A	185.89
IWA5897	4A	188.66
IWB24852	4A	189.77
IWB26487	4A	189.77
IWB32943	4A	189.77
IWB38110	4A	189.77
IWB43914	4A	189.77
IWB45611	4A	189.77
IWB57437	4A	189.77
IWB60593	4A	189.77
IWB65778	4A	189.77
IWA1077	4A	189.77
IWA1824	4A	189.77
IWA3026	4A	189.77
IWA3029	4A	189.77
IWA7271	4A	189.77
IWA126	4A	190.28
IWA6046	4A	190.28
IWB1356	4A	191.56
IWB3924	4A	191.56
IWB5379	4A	191.56
IWB6937	4A	191.56
IWB12426	4A	191.56
IWB14639	4A	191.56
IWB15562	4A	191.56
IWB21081	4A	191.56
IWB25147	4A	191.56
IWB27969	4A	191.56
IWB44963	4A	191.56
IWB47602	4A	191.56
IWB48417	4A	191.56
IWB52118	4A	191.56
IWB55207	4A	191.56
IWB57873	4A	191.56
IWB65412	4A	191.56
IWB74979	4A	191.56
IWA40	4A	191.56
IWA1940	4A	191.56
IWA2585	4A	191.56
IWA3489	4A	191.56
IWA5335	4A	191.56
IWB74132	4A	192.07
IWB34384	4A	194.76
IWA7107	4A	194.76
IWB28877	4A	195.88
IWA7448	4A	197.32
IWB9	4A	200.05
IWB33127	4A	200.05
IWB61674	4A	200.05
IWB7495	4A	200.89
IWA482	4A	202.19
IWB6376	4A	203.25
IWB56169	4A	203.25
IWB57347	4A	207.77
IWB36833	4A	214.43
[truncated: 2,593 more rows]
